# Supplementary material
Source: publisher figshare collection journal article supplement (https://acs.figshare.com/ndownloader/files/3700516)
Supplement: Supplementary file 1 [file 3700516]

 
data_mo_150807lt_0m
 
_audit_creation_method            SHELXL-2014/6
_chemical_name_systematic         ?
_chemical_name_common             ?
_chemical_melting_point           ?
_chemical_formula_moiety          ?
_chemical_formula_sum
 'C18 H19 N O5 S' 
_chemical_formula_weight          361.40

loop_
 _atom_type_symbol
 _atom_type_description
 _atom_type_scat_dispersion_real
 _atom_type_scat_dispersion_imag
 _atom_type_scat_source
 'C'  'C'   0.0033   0.0016
 'International Tables Vol C Tables 4.2.6.8 and 6.1.1.4'
 'H'  'H'   0.0000   0.0000
 'International Tables Vol C Tables 4.2.6.8 and 6.1.1.4'
 'N'  'N'   0.0061   0.0033
 'International Tables Vol C Tables 4.2.6.8 and 6.1.1.4'
 'O'  'O'   0.0106   0.0060
 'International Tables Vol C Tables 4.2.6.8 and 6.1.1.4'
 'S'  'S'   0.1246   0.1234
 'International Tables Vol C Tables 4.2.6.8 and 6.1.1.4'
 
_space_group_crystal_system       monoclinic
_space_group_IT_number            14
_space_group_name_H-M_alt         'P 21/n'
_space_group_name_Hall            '-P 2yn'
 
_shelx_space_group_comment
;
The symmetry employed for this shelxl refinement is uniquely defined
by the following loop, which should always be used as a source of
symmetry information in preference to the above space-group names.
They are only intended as comments.
;
 
loop_
 _space_group_symop_operation_xyz
 'x, y, z'
 '-x+1/2, y+1/2, -z+1/2'
 '-x, -y, -z'
 'x-1/2, -y-1/2, z-1/2'
 
_cell_length_a                    11.8500(15)
_cell_length_b                    10.4794(13)
_cell_length_c                    13.4988(17)
_cell_angle_alpha                 90
_cell_angle_beta                  91.813(3)
_cell_angle_gamma                 90
_cell_volume                      1675.5(4)
_cell_formula_units_Z             4
_cell_measurement_temperature     100(2)
_cell_measurement_reflns_used     3187
_cell_measurement_theta_min       2.4609
_cell_measurement_theta_max       26.3579
 
_exptl_crystal_description        Lump
_exptl_crystal_colour             Colorless
_exptl_crystal_density_meas       'not measured'
_exptl_crystal_density_method     'not measured'
_exptl_crystal_density_diffrn     1.433          
_exptl_crystal_F_000              760
_exptl_transmission_factor_min    ?
_exptl_transmission_factor_max    ?
_exptl_crystal_size_max           0.25
_exptl_crystal_size_mid           0.20
_exptl_crystal_size_min           0.20
_exptl_absorpt_coefficient_mu     0.223
_shelx_estimated_absorpt_T_min    ?
_shelx_estimated_absorpt_T_max    ?
_exptl_absorpt_correction_type    multi-scan
_exptl_absorpt_correction_T_min   0.8959  
_exptl_absorpt_correction_T_max   0.9485
_exptl_absorpt_process_details    'SADABS V2014/4 (Bruker AXS Inc.)'
_exptl_absorpt_special_details    ?
_diffrn_ambient_temperature       100(2)
_diffrn_radiation_wavelength      0.71073
_diffrn_radiation_type            MoK\a
_diffrn_source                    ?
_diffrn_measurement_device_type   'Bruker APEX-II CCD'
_diffrn_measurement_method        '\f and \w scans'
_diffrn_detector_area_resol_mean  8.3333
_diffrn_reflns_number             13556
_diffrn_reflns_av_unetI/netI      0.0360
_diffrn_reflns_av_R_equivalents   0.0396
_diffrn_reflns_limit_h_min        -14
_diffrn_reflns_limit_h_max        14
_diffrn_reflns_limit_k_min        -12
_diffrn_reflns_limit_k_max        13
_diffrn_reflns_limit_l_min        -16
_diffrn_reflns_limit_l_max        13
_diffrn_reflns_theta_min          2.252
_diffrn_reflns_theta_max          26.378
_diffrn_reflns_theta_full         25.242
_diffrn_measured_fraction_theta_max   0.999
_diffrn_measured_fraction_theta_full  1.000
_diffrn_reflns_Laue_measured_fraction_max    0.999
_diffrn_reflns_Laue_measured_fraction_full   1.000
_diffrn_reflns_point_group_measured_fraction_max   0.999
_diffrn_reflns_point_group_measured_fraction_full  1.000
_reflns_number_total              3422
_reflns_number_gt                 2771
_reflns_threshold_expression      'I > 2\s(I)'
_reflns_Friedel_coverage          0.000
_reflns_Friedel_fraction_max      .
_reflns_Friedel_fraction_full     .
 
_reflns_special_details
;
 Reflections were merged by SHELXL according to the crystal
 class for the calculation of statistics and refinement.
 
 _reflns_Friedel_fraction is defined as the number of unique
 Friedel pairs measured divided by the number that would be
 possible theoretically, ignoring centric projections and
 systematic absences.
;
 
_computing_data_collection        'APEX2 (Bruker AXS, 2010)'
_computing_cell_refinement        'SAINT V8.34A (Bruker AXS Inc., 2013)'
_computing_data_reduction         'SAINT V8.34A (Bruker AXS Inc., 2013)'
_computing_structure_solution     ?
_computing_structure_refinement   'SHELXL-2014/6 (Sheldrick, 2014)'
_computing_molecular_graphics     'SHELXTL (Sheldrick, 2008)'
_computing_publication_material   'SHELXTL'
_refine_special_details           ?
_refine_ls_structure_factor_coef  Fsqd
_refine_ls_matrix_type            full
_refine_ls_weighting_scheme       calc
_refine_ls_weighting_details
'w=1/[\s^2^(Fo^2^)+(0.0381P)^2^+0.7741P] where P=(Fo^2^+2Fc^2^)/3'
_atom_sites_solution_primary      ?
_atom_sites_solution_secondary    ?
_atom_sites_solution_hydrogens    geom
_refine_ls_hydrogen_treatment     constr
_refine_ls_extinction_method      none
_refine_ls_extinction_coef        .
_refine_ls_number_reflns          3422
_refine_ls_number_parameters      228
_refine_ls_number_restraints      0
_refine_ls_R_factor_all           0.0484
_refine_ls_R_factor_gt            0.0352
_refine_ls_wR_factor_ref          0.0877
_refine_ls_wR_factor_gt           0.0807
_refine_ls_goodness_of_fit_ref    1.024
_refine_ls_restrained_S_all       1.024
_refine_ls_shift/su_max           0.001
_refine_ls_shift/su_mean          0.000
 
loop_
 _atom_site_label
 _atom_site_type_symbol
 _atom_site_fract_x
 _atom_site_fract_y
 _atom_site_fract_z
 _atom_site_U_iso_or_equiv
 _atom_site_adp_type
 _atom_site_occupancy
 _atom_site_site_symmetry_order  
 _atom_site_calc_flag
 _atom_site_refinement_flags_posn
 _atom_site_refinement_flags_adp
 _atom_site_refinement_flags_occupancy
 _atom_site_disorder_assembly
 _atom_site_disorder_group
S1 S 0.71930(4) 0.17507(4) 0.64084(3) 0.01560(12) Uani 1 1 d . . . . .
O1 O 0.27992(10) 0.00485(13) 0.91015(11) 0.0290(3) Uani 1 1 d . . . . .
O2 O 0.40835(11) -0.12332(12) 0.85824(10) 0.0264(3) Uani 1 1 d . . . . .
O3 O 0.84180(10) 0.23127(11) 0.86138(9) 0.0180(3) Uani 1 1 d . . . . .
O4 O 0.73873(11) 0.30943(11) 0.65828(9) 0.0224(3) Uani 1 1 d . . . . .
O5 O 0.75872(10) 0.12006(12) 0.55010(9) 0.0217(3) Uani 1 1 d . . . . .
N1 N 0.37726(12) -0.01852(14) 0.88768(11) 0.0192(3) Uani 1 1 d . . . . .
C1 C 0.46154(14) 0.08483(16) 0.89601(12) 0.0158(4) Uani 1 1 d . . . . .
C2 C 0.57072(14) 0.05843(15) 0.87084(12) 0.0146(3) Uani 1 1 d . . . . .
H19 H 0.5914 -0.0250 0.8508 0.017 Uiso 1 1 calc R U . . .
C3 C 0.65043(14) 0.15628(16) 0.87525(12) 0.0144(3) Uani 1 1 d . . . . .
C4 C 0.76858(14) 0.12522(15) 0.84600(13) 0.0152(4) Uani 1 1 d . . . . .
H16 H 0.7968 0.0547 0.8902 0.018 Uiso 1 1 calc R U . . .
C5 C 0.78782(14) 0.08397(15) 0.73810(12) 0.0144(3) Uani 1 1 d . . . . .
H12 H 0.7696 -0.0086 0.7297 0.017 Uiso 1 1 calc R U . . .
C6 C 0.57323(14) 0.14550(16) 0.64466(12) 0.0152(4) Uani 1 1 d . . . . .
C7 C 0.53255(14) 0.02359(16) 0.62292(12) 0.0166(4) Uani 1 1 d . . . . .
H11 H 0.5828 -0.0434 0.6069 0.020 Uiso 1 1 calc R U . . .
C8 C 0.41735(14) 0.00217(16) 0.62516(13) 0.0169(4) Uani 1 1 d . . . . .
H10 H 0.3890 -0.0811 0.6119 0.020 Uiso 1 1 calc R U . . .
C9 C 0.34205(14) 0.09973(16) 0.64636(13) 0.0173(4) Uani 1 1 d . . . . .
C10 C 0.21733(15) 0.07230(18) 0.64983(14) 0.0233(4) Uani 1 1 d . . . . .
H7 H 0.2018 0.0242 0.7102 0.035 Uiso 1 1 calc R U . . .
H6 H 0.1937 0.0219 0.5916 0.035 Uiso 1 1 calc R U . . .
H1 H 0.1754 0.1529 0.6499 0.035 Uiso 1 1 calc R U . . .
C11 C 0.42729(15) 0.20388(17) 0.92814(13) 0.0196(4) Uani 1 1 d . . . . .
H2 H 0.3514 0.2193 0.9453 0.024 Uiso 1 1 calc R U . . .
C12 C 0.94668(14) 0.19958(16) 0.81540(13) 0.0182(4) Uani 1 1 d . . . . .
H15 H 0.9790 0.2787 0.7861 0.022 Uiso 1 1 calc R U . . .
C13 C 1.03045(16) 0.1461(2) 0.89132(14) 0.0283(4) Uani 1 1 d . . . . .
H3 H 1.0411 0.2071 0.9458 0.043 Uiso 1 1 calc R U . . .
H5 H 1.1028 0.1312 0.8602 0.043 Uiso 1 1 calc R U . . .
H4 H 1.0017 0.0654 0.9172 0.043 Uiso 1 1 calc R U . . .
C14 C 0.91616(14) 0.10514(16) 0.73105(13) 0.0182(4) Uani 1 1 d . . . . .
H14 H 0.9345 0.1417 0.6659 0.022 Uiso 1 1 calc R U . . .
H13 H 0.9577 0.0238 0.7403 0.022 Uiso 1 1 calc R U . . .
C15 C 0.38462(15) 0.22150(17) 0.66465(14) 0.0211(4) Uani 1 1 d . . . . .
H9 H 0.3341 0.2896 0.6772 0.025 Uiso 1 1 calc R U . . .
C16 C 0.49965(15) 0.24477(16) 0.66479(13) 0.0199(4) Uani 1 1 d . . . . .
H8 H 0.5280 0.3279 0.6785 0.024 Uiso 1 1 calc R U . . .
C17 C 0.61842(15) 0.27664(16) 0.90761(13) 0.0173(4) Uani 1 1 d . . . . .
H17 H 0.6724 0.3436 0.9115 0.021 Uiso 1 1 calc R U . . .
C18 C 0.50785(15) 0.29938(17) 0.93422(13) 0.0208(4) Uani 1 1 d . . . . .
H18 H 0.4873 0.3817 0.9569 0.025 Uiso 1 1 calc R U . . .
 
loop_
 _atom_site_aniso_label
 _atom_site_aniso_U_11
 _atom_site_aniso_U_22
 _atom_site_aniso_U_33
 _atom_site_aniso_U_23
 _atom_site_aniso_U_13
 _atom_site_aniso_U_12
S1 0.0183(2) 0.0142(2) 0.0143(2) 0.00108(16) 0.00200(16) -0.00371(16)
O1 0.0128(6) 0.0350(8) 0.0394(9) 0.0013(6) 0.0029(6) -0.0001(5)
O2 0.0259(7) 0.0208(7) 0.0327(8) -0.0045(6) 0.0056(6) -0.0049(5)
O3 0.0157(6) 0.0176(6) 0.0209(7) -0.0052(5) 0.0038(5) -0.0041(5)
O4 0.0268(7) 0.0142(6) 0.0262(7) 0.0035(5) -0.0009(6) -0.0060(5)
O5 0.0221(7) 0.0284(7) 0.0148(7) -0.0013(5) 0.0049(5) -0.0066(5)
N1 0.0186(8) 0.0244(8) 0.0147(8) 0.0032(6) 0.0004(6) -0.0014(6)
C1 0.0166(8) 0.0188(8) 0.0121(9) 0.0022(6) 0.0004(7) -0.0018(7)
C2 0.0183(8) 0.0144(8) 0.0111(9) 0.0002(6) 0.0009(7) 0.0014(6)
C3 0.0176(8) 0.0168(8) 0.0090(8) 0.0013(6) 0.0009(7) 0.0008(6)
C4 0.0170(8) 0.0134(8) 0.0153(9) -0.0008(6) 0.0009(7) -0.0024(6)
C5 0.0161(8) 0.0117(8) 0.0157(9) 0.0006(6) 0.0033(7) -0.0005(6)
C6 0.0169(8) 0.0173(8) 0.0114(8) 0.0012(6) 0.0004(7) -0.0008(6)
C7 0.0195(9) 0.0165(8) 0.0138(9) 0.0006(7) 0.0014(7) 0.0021(7)
C8 0.0194(9) 0.0174(8) 0.0139(9) 0.0001(7) -0.0005(7) -0.0015(7)
C9 0.0179(9) 0.0217(9) 0.0123(9) 0.0010(7) -0.0008(7) 0.0026(7)
C10 0.0174(9) 0.0283(10) 0.0243(11) -0.0006(8) 0.0005(8) 0.0028(7)
C11 0.0181(9) 0.0261(10) 0.0148(9) 0.0010(7) 0.0022(7) 0.0047(7)
C12 0.0161(9) 0.0199(9) 0.0187(9) -0.0005(7) 0.0038(7) -0.0024(7)
C13 0.0237(10) 0.0384(11) 0.0228(11) -0.0023(8) -0.0012(8) 0.0035(8)
C14 0.0166(9) 0.0197(9) 0.0184(10) -0.0019(7) 0.0036(7) 0.0001(7)
C15 0.0239(9) 0.0202(9) 0.0192(10) -0.0002(7) -0.0004(8) 0.0064(7)
C16 0.0254(10) 0.0142(8) 0.0200(10) 0.0005(7) -0.0008(8) 0.0012(7)
C17 0.0220(9) 0.0163(8) 0.0137(9) -0.0013(7) 0.0016(7) -0.0018(7)
C18 0.0256(10) 0.0183(9) 0.0185(10) -0.0029(7) 0.0023(8) 0.0057(7)
 
_geom_special_details
;
 All esds (except the esd in the dihedral angle between two l.s. planes)
 are estimated using the full covariance matrix.  The cell esds are taken
 into account individually in the estimation of esds in distances, angles
 and torsion angles; correlations between esds in cell parameters are only
 used when they are defined by crystal symmetry.  An approximate (isotropic)
 treatment of cell esds is used for estimating esds involving l.s. planes.
;
 
loop_
 _geom_bond_atom_site_label_1
 _geom_bond_atom_site_label_2
 _geom_bond_distance
 _geom_bond_site_symmetry_2
 _geom_bond_publ_flag
S1 O5 1.4447(13) . ?
S1 O4 1.4449(12) . ?
S1 C6 1.7608(17) . ?
S1 C5 1.7964(17) . ?
O1 N1 1.2267(19) . ?
O2 N1 1.2284(19) . ?
O3 C4 1.4211(19) . ?
O3 C12 1.445(2) . ?
N1 C1 1.475(2) . ?
C1 C2 1.376(2) . ?
C1 C11 1.386(2) . ?
C2 C3 1.394(2) . ?
C2 H19 0.9500 . ?
C3 C17 1.391(2) . ?
C3 C4 1.502(2) . ?
C4 C5 1.543(2) . ?
C4 H16 1.0000 . ?
C5 C14 1.543(2) . ?
C5 H12 1.0000 . ?
C6 C16 1.390(2) . ?
C6 C7 1.393(2) . ?
C7 C8 1.385(2) . ?
C7 H11 0.9500 . ?
C8 C9 1.393(2) . ?
C8 H10 0.9500 . ?
C9 C15 1.391(2) . ?
C9 C10 1.508(2) . ?
C10 H7 0.9800 . ?
C10 H6 0.9800 . ?
C10 H1 0.9800 . ?
C11 C18 1.384(3) . ?
C11 H2 0.9500 . ?
C12 C13 1.512(2) . ?
C12 C14 1.543(2) . ?
C12 H15 1.0000 . ?
C13 H3 0.9800 . ?
C13 H5 0.9800 . ?
C13 H4 0.9800 . ?
C14 H14 0.9900 . ?
C14 H13 0.9900 . ?
C15 C16 1.385(3) . ?
C15 H9 0.9500 . ?
C16 H8 0.9500 . ?
C17 C18 1.390(2) . ?
C17 H17 0.9500 . ?
C18 H18 0.9500 . ?
 
loop_
 _geom_angle_atom_site_label_1
 _geom_angle_atom_site_label_2
 _geom_angle_atom_site_label_3
 _geom_angle
 _geom_angle_site_symmetry_1
 _geom_angle_site_symmetry_3
 _geom_angle_publ_flag
O5 S1 O4 118.22(8) . . ?
O5 S1 C6 107.41(8) . . ?
O4 S1 C6 108.57(8) . . ?
O5 S1 C5 104.88(8) . . ?
O4 S1 C5 109.43(7) . . ?
C6 S1 C5 107.89(8) . . ?
C4 O3 C12 106.67(12) . . ?
O1 N1 O2 123.53(15) . . ?
O1 N1 C1 118.31(15) . . ?
O2 N1 C1 118.16(14) . . ?
C2 C1 C11 123.04(16) . . ?
C2 C1 N1 118.24(15) . . ?
C11 C1 N1 118.72(15) . . ?
C1 C2 C3 118.85(15) . . ?
C1 C2 H19 120.6 . . ?
C3 C2 H19 120.6 . . ?
C17 C3 C2 119.28(16) . . ?
C17 C3 C4 122.99(15) . . ?
C2 C3 C4 117.72(15) . . ?
O3 C4 C3 111.22(13) . . ?
O3 C4 C5 104.43(13) . . ?
C3 C4 C5 118.39(14) . . ?
O3 C4 H16 107.4 . . ?
C3 C4 H16 107.4 . . ?
C5 C4 H16 107.4 . . ?
C14 C5 C4 101.15(13) . . ?
C14 C5 S1 107.59(11) . . ?
C4 C5 S1 117.65(11) . . ?
C14 C5 H12 110.0 . . ?
C4 C5 H12 110.0 . . ?
S1 C5 H12 110.0 . . ?
C16 C6 C7 120.83(16) . . ?
C16 C6 S1 119.83(13) . . ?
C7 C6 S1 119.28(13) . . ?
C8 C7 C6 118.61(16) . . ?
C8 C7 H11 120.7 . . ?
C6 C7 H11 120.7 . . ?
C7 C8 C9 121.60(16) . . ?
C7 C8 H10 119.2 . . ?
C9 C8 H10 119.2 . . ?
C15 C9 C8 118.60(16) . . ?
C15 C9 C10 121.31(16) . . ?
C8 C9 C10 120.09(16) . . ?
C9 C10 H7 109.5 . . ?
C9 C10 H6 109.5 . . ?
H7 C10 H6 109.5 . . ?
C9 C10 H1 109.5 . . ?
H7 C10 H1 109.5 . . ?
H6 C10 H1 109.5 . . ?
C18 C11 C1 117.48(16) . . ?
C18 C11 H2 121.3 . . ?
C1 C11 H2 121.3 . . ?
O3 C12 C13 110.43(15) . . ?
O3 C12 C14 106.24(13) . . ?
C13 C12 C14 113.34(15) . . ?
O3 C12 H15 108.9 . . ?
C13 C12 H15 108.9 . . ?
C14 C12 H15 108.9 . . ?
C12 C13 H3 109.5 . . ?
C12 C13 H5 109.5 . . ?
H3 C13 H5 109.5 . . ?
C12 C13 H4 109.5 . . ?
H3 C13 H4 109.5 . . ?
H5 C13 H4 109.5 . . ?
C5 C14 C12 104.78(13) . . ?
C5 C14 H14 110.8 . . ?
C12 C14 H14 110.8 . . ?
C5 C14 H13 110.8 . . ?
C12 C14 H13 110.8 . . ?
H14 C14 H13 108.9 . . ?
C16 C15 C9 120.88(16) . . ?
C16 C15 H9 119.6 . . ?
C9 C15 H9 119.6 . . ?
C15 C16 C6 119.44(16) . . ?
C15 C16 H8 120.3 . . ?
C6 C16 H8 120.3 . . ?
C18 C17 C3 120.34(16) . . ?
C18 C17 H17 119.8 . . ?
C3 C17 H17 119.8 . . ?
C11 C18 C17 120.98(16) . . ?
C11 C18 H18 119.5 . . ?
C17 C18 H18 119.5 . . ?
 
_refine_diff_density_max    0.393
_refine_diff_density_min   -0.370
_refine_diff_density_rms    0.049

_shelxl_version_number 2014/6

_shelx_res_file
;
TITL mo_150807lt_0m in P2(1)/n
CELL 0.71073 11.8500 10.4794 13.4988 90.000 91.813 90.000
ZERR 4.00 0.0015 0.0013 0.0017 0.000 0.003 0.000
LATT 1
SYMM -x+1/2, y+1/2, -z+1/2
SFAC C  H  N  O  S
UNIT 72  76  4  20  4
L.S. 4
ACTA
BOND $H
FMAP 2
PLAN 5
TEMP -173.000
WGHT    0.038100    0.774100
FVAR       0.59518
S1    5    0.719295    0.175070    0.640837    11.00000    0.01833    0.01422 =
         0.01435    0.00108    0.00200   -0.00371
O1    4    0.279919    0.004845    0.910148    11.00000    0.01277    0.03501 =
         0.03938    0.00129    0.00290   -0.00009
O2    4    0.408348   -0.123321    0.858242    11.00000    0.02591    0.02083 =
         0.03268   -0.00448    0.00563   -0.00487
O3    4    0.841799    0.231266    0.861385    11.00000    0.01569    0.01757 =
         0.02089   -0.00522    0.00380   -0.00412
O4    4    0.738734    0.309434    0.658280    11.00000    0.02684    0.01415 =
         0.02621    0.00347   -0.00087   -0.00598
O5    4    0.758724    0.120057    0.550097    11.00000    0.02210    0.02839 =
         0.01483   -0.00129    0.00490   -0.00663
N1    3    0.377264   -0.018523    0.887684    11.00000    0.01859    0.02443 =
         0.01472    0.00320    0.00042   -0.00143
C1    1    0.461536    0.084830    0.896011    11.00000    0.01656    0.01875 =
         0.01214    0.00219    0.00036   -0.00177
C2    1    0.570724    0.058430    0.870844    11.00000    0.01826    0.01438 =
         0.01110    0.00016    0.00088    0.00142
AFIX  43
H19   2    0.591428   -0.025035    0.850816    11.00000   -1.20000
AFIX   0
C3    1    0.650427    0.156281    0.875247    11.00000    0.01758    0.01681 =
         0.00898    0.00125    0.00093    0.00077
C4    1    0.768581    0.125219    0.846004    11.00000    0.01699    0.01337 =
         0.01530   -0.00076    0.00088   -0.00237
AFIX  13
H16   2    0.796754    0.054746    0.890189    11.00000   -1.20000
AFIX   0
C5    1    0.787824    0.083974    0.738097    11.00000    0.01611    0.01167 =
         0.01566    0.00055    0.00334   -0.00047
AFIX  13
H12   2    0.769646   -0.008650    0.729651    11.00000   -1.20000
AFIX   0
C6    1    0.573227    0.145502    0.644655    11.00000    0.01693    0.01732 =
         0.01139    0.00120    0.00044   -0.00082
C7    1    0.532547    0.023590    0.622919    11.00000    0.01953    0.01652 =
         0.01376    0.00056    0.00145    0.00213
AFIX  43
H11   2    0.582791   -0.043419    0.606900    11.00000   -1.20000
AFIX   0
C8    1    0.417353    0.002167    0.625160    11.00000    0.01939    0.01736 =
         0.01392    0.00013   -0.00045   -0.00146
AFIX  43
H10   2    0.388999   -0.081101    0.611915    11.00000   -1.20000
AFIX   0
C9    1    0.342047    0.099735    0.646359    11.00000    0.01791    0.02165 =
         0.01229    0.00103   -0.00082    0.00262
C10   1    0.217335    0.072295    0.649826    11.00000    0.01737    0.02827 =
         0.02433   -0.00063    0.00051    0.00275
AFIX 137
H7    2    0.201847    0.024239    0.710175    11.00000   -1.50000
H6    2    0.193705    0.021922    0.591624    11.00000   -1.50000
H1    2    0.175393    0.152890    0.649932    11.00000   -1.50000
AFIX   0
C11   1    0.427288    0.203882    0.928141    11.00000    0.01808    0.02611 =
         0.01476    0.00098    0.00221    0.00468
AFIX  43
H2    2    0.351379    0.219342    0.945339    11.00000   -1.20000
AFIX   0
C12   1    0.946678    0.199575    0.815395    11.00000    0.01612    0.01986 =
         0.01873   -0.00054    0.00378   -0.00239
AFIX  13
H15   2    0.978958    0.278723    0.786119    11.00000   -1.20000
AFIX   0
C13   1    1.030447    0.146134    0.891315    11.00000    0.02372    0.03842 =
         0.02276   -0.00231   -0.00116    0.00349
AFIX 137
H3    2    1.041061    0.207149    0.945834    11.00000   -1.50000
H5    2    1.102849    0.131179    0.860157    11.00000   -1.50000
H4    2    1.001740    0.065427    0.917175    11.00000   -1.50000
AFIX   0
C14   1    0.916164    0.105141    0.731050    11.00000    0.01661    0.01975 =
         0.01843   -0.00185    0.00360    0.00006
AFIX  23
H14   2    0.934508    0.141666    0.665866    11.00000   -1.20000
H13   2    0.957655    0.023802    0.740334    11.00000   -1.20000
AFIX   0
C15   1    0.384623    0.221496    0.664654    11.00000    0.02392    0.02016 =
         0.01918   -0.00018   -0.00037    0.00639
AFIX  43
H9    2    0.334104    0.289572    0.677217    11.00000   -1.20000
AFIX   0
C16   1    0.499645    0.244771    0.664792    11.00000    0.02540    0.01419 =
         0.02001    0.00053   -0.00082    0.00117
AFIX  43
H8    2    0.528026    0.327902    0.678538    11.00000   -1.20000
AFIX   0
C17   1    0.618419    0.276640    0.907607    11.00000    0.02197    0.01634 =
         0.01374   -0.00125    0.00162   -0.00183
AFIX  43
H17   2    0.672402    0.343616    0.911532    11.00000   -1.20000
AFIX   0
C18   1    0.507846    0.299381    0.934225    11.00000    0.02561    0.01834 =
         0.01850   -0.00293    0.00228    0.00567
AFIX  43
H18   2    0.487285    0.381716    0.956930    11.00000   -1.20000
AFIX   0
HKLF 4 1 1 0 0 0 1 0 0 0 1

REM  mo_150807lt_0m in P2(1)/n
REM R1 =  0.0352 for    2771 Fo > 4sig(Fo)  and  0.0484 for all    3422 data
REM    228 parameters refined using      0 restraints

END

WGHT      0.0381      0.7739

REM Highest difference peak  0.393,  deepest hole -0.370,  1-sigma level  0.049
Q1    1   0.6386  0.1566  0.6455  11.00000  0.05    0.39
Q2    1   0.7602  0.1339  0.7000  11.00000  0.05    0.34
Q3    1   0.7690  0.1125  0.7835  11.00000  0.05    0.29
Q4    1   0.6120  0.1119  0.8649  11.00000  0.05    0.26
Q5    1   0.9334  0.1506  0.7733  11.00000  0.05    0.25
;
_shelx_res_checksum   23099

_shelx_hkl_file
;
   1   0   0 0.39049 0.59935   1
   2   0   0 221.812 5.98647   1
   3   0   0 1.90511 2.15475   1
   4   0   0 1543.95 26.2082   1
   5   0   0 0.38296 2.35404   1
   6   0   0 2039.83 36.2352   1
   7   0   0 2.76808 3.25188   1
   8   0   0 158.840 10.4088   1
   9   0   0 -0.7240 3.39470   1
  10   0   0 5.60179 4.66937   4
  10   0   0 4.26108 4.48142   1
  11   0   0 0.89943 4.42352   1
  11   0   0 1.57670 4.47721   4
  12   0   0 9.70776 5.58840   4
  12   0   0 5.09020 5.89556   1
  13   0   0 -1.2354 4.57654   1
  14   0   0 379.829 22.2224   1
 -14   0   0 406.143 21.5449   1
   0  -1   0 0.27319 0.62109   2
   0  -1   0 -0.7847 0.66869   1
   0   1   0 -0.9161 0.70642   4
   1  -1   0 2981.88 37.1381   1
  -1  -1   0 2947.13 37.9770   2
  -1   1   0 2976.13 37.3545   4
   1   1   0 2953.11 37.4846   1
   1   1   0 2962.80 37.5882   4
  -2   1   0 -1.4462 1.53879   4
   2   1   0 -0.6643 1.40261   4
   2   1   0 -1.3214 1.28947   1
   3  -1   0 90.9718 5.17625   1
  -3   1   0 92.1868 5.13340   4
   3   1   0 95.4536 2.89094   3
   3   1   0 91.4905 5.24908   1
   4  -1   0 36.6428 4.39815   1
  -4   1   0 31.0913 3.95582   4
   4   1   0 27.0151 3.80617   1
   5  -1   0 1027.20 21.3642   1
   5   1   0 1032.02 21.5683   1
   6  -1   0 126.180 8.02845   1
   6   1   0 137.364 8.19317   1
   7  -1   0 34.4871 5.30692   1
   7   1   0 28.1534 5.31665   1
   8  -1   0 435.880 16.3715   1
   8   1   0 427.714 16.0676   4
   8   1   0 440.443 16.6237   1
   9  -1   0 6.31599 4.47128   1
   9   1   0 7.59405 4.66111   1
   9   1   0 3.18219 4.39852   4
  10  -1   0 348.458 16.9758   1
  10   1   0 368.845 17.1697   4
  10   1   0 336.236 16.8735   1
  10   1   0 351.618 15.1460   3
  11  -1   0 5.78550 5.35626   1
  11   1   0 9.39717 5.51697   1
  11   1   0 7.51310 4.80942   4
  12  -1   0 3.40362 5.06764   4
  12  -1   0 0.00894 4.91659   1
  12   1   0 -2.8510 4.22437   4
  12   1   0 6.69167 5.70787   1
  13  -1   0 13.8584 6.78373   1
 -13  -1   0 0.77745 5.08325   1
  13   1   0 7.19146 6.12160   1
  13   1   0 11.6353 6.45467   4
  14  -1   0 13.0723 7.42984   1
 -14  -1   0 10.5050 6.90928   1
  14   1   0 27.4163 9.43964   1
 -14   1   0 16.6144 6.98950   1
   0  -2   0 813.764 12.5346   2
   0  -2   0 816.027 13.3373   1
   0   2   0 787.795 13.3588   4
  -1  -2   0 3283.19 42.9015   1
  -1  -2   0 3213.64 42.5342   2
   1  -2   0 3226.39 42.1741   1
   1  -2   0 3241.50 41.4373   2
  -1   2   0 3332.57 42.6570   4
   1   2   0 3264.72 42.9388   4
   1   2   0 3237.94 42.3968   1
  -2  -2   0 43.0479 3.91696   1
   2  -2   0 50.5292 3.93437   1
  -2  -2   0 54.2881 4.59824   2
  -2   2   0 41.5795 3.66754   4
   2   2   0 45.1045 3.92970   4
   2   2   0 52.6149 4.46434   1
   3  -2   0 29.3190 3.58498   1
   3   2   0 35.6977 4.13057   1
  -3   2   0 38.7710 4.12867   4
   3   2   0 36.1704 4.21623   4
   4  -2   0 4.44277 2.28922   1
  -4   2   0 1.79266 2.27435   4
   4   2   0 3.28767 2.59852   1
   4   2   0 -0.7100 2.11745   4
   5  -2   0 623.642 16.0293   1
   5   2   0 610.858 16.4262   4
  -5   2   0 622.640 16.3288   4
   5   2   0 642.702 16.4584   1
   6  -2   0 318.465 12.0301   1
   6   2   0 309.276 12.1243   1
  -6   2   0 299.673 12.1059   4
   6   2   0 325.082 12.5352   4
   7  -2   0 544.709 17.3007   1
  -7   2   0 581.730 18.1538   4
   7   2   0 542.378 17.4227   1
   7   2   0 578.921 18.0962   4
   8  -2   0 163.686 10.7043   1
   8   2   0 177.421 11.0292   1
   8   2   0 172.181 10.8057   4
   9  -2   0 186.193 12.1715   1
   9   2   0 201.897 12.5152   1
   9   2   0 188.279 12.0230   4
  10  -2   0 23.0834 6.24822   1
  10   2   0 13.2223 5.64447   4
  10   2   0 20.5451 5.79756   1
  11  -2   0 51.3875 8.80414   1
 -11  -2   0 39.1104 9.09317   1
  11   2   0 48.4113 8.78088   1
  11   2   0 34.8322 7.78444   4
  12  -2   0 44.3014 9.09671   1
 -12  -2   0 44.6481 8.96135   1
  12   2   0 43.6503 8.85643   1
  12   2   0 73.6751 10.7277   4
  13  -2   0 56.2555 10.9978   1
 -13  -2   0 57.3950 11.7865   2
 -13  -2   0 54.4521 9.81280   1
  13   2   0 73.5266 11.6206   4
  13   2   0 54.5297 10.0310   1
 -14  -2   0 11.7589 7.40868   1
  14  -2   0 7.90824 7.27516   1
 -14  -2   0 4.54162 7.73649   2
  14   2   0 8.11348 6.40072   1
   0  -3   0 -0.1709 2.04658   1
   0  -3   0 0.51643 1.71292   2
   0   3   0 -0.6394 2.03419   4
   1  -3   0 1042.36 16.6091   2
  -1  -3   0 1045.66 18.4610   1
   1  -3   0 1032.35 17.7863   1
  -1  -3   0 1009.08 17.6227   2
   1   3   0 1003.08 17.4907   1
  -1   3   0 1025.90 18.0995   4
   1   3   0 1027.16 18.4032   4
  -2  -3   0 496.268 12.2671   2
   2  -3   0 499.282 11.6335   1
  -2  -3   0 506.932 12.4305   1
  -2   3   0 483.787 11.8265   4
   2   3   0 509.038 11.9627   1
   2   3   0 525.319 12.5706   4
  -3  -3   0 565.585 14.7255   2
  -3  -3   0 584.871 14.5116   1
   3  -3   0 587.988 13.6579   1
   3   3   0 563.456 13.7189   1
  -3   3   0 573.174 13.8625   4
   3   3   0 561.148 14.3237   4
  -4  -3   0 366.081 12.2614   1
   4  -3   0 378.226 11.5193   1
  -4  -3   0 353.132 12.5914   2
   4   3   0 376.853 11.7068   1
  -4   3   0 357.779 11.5427   4
   4   3   0 343.068 11.8130   4
  -5  -3   0 11.6645 4.23978   2
   5  -3   0 17.4890 4.08579   1
   5   3   0 13.3044 3.66623   1
  -5   3   0 12.4616 3.63364   4
   5   3   0 8.94299 3.21459   4
   6  -3   0 161.798 9.19951   1
   6   3   0 188.062 10.0530   4
   6   3   0 193.828 9.95846   1
  -6   3   0 164.449 9.51587   4
   7  -3   0 93.9049 9.32361   1
   7   3   0 80.4945 8.42371   4
   7   3   0 76.2640 7.92806   1
  -7   3   0 75.3059 8.02791   4
   8  -3   0 56.8571 8.38482   1
  -8   3   0 40.8690 6.88612   4
   8   3   0 41.5761 6.91752   4
   8   3   0 41.7023 6.49643   1
  -9  -3   0 1.39676 4.43879   1
   9  -3   0 -4.2659 3.36697   1
   9   3   0 -2.3898 3.81783   1
   9   3   0 0.61989 4.36648   4
 -10  -3   0 145.881 14.8845   2
  10  -3   0 154.926 13.2823   1
 -10  -3   0 163.534 15.0485   1
  10   3   0 172.204 12.8136   4
  10   3   0 151.384 12.1225   1
 -11  -3   0 2.81135 6.04894   2
  11  -3   0 0.78664 4.72292   1
 -11  -3   0 1.53308 5.17751   1
  11   3   0 1.69069 4.63180   1
  11   3   0 7.42356 5.34944   4
 -12  -3   0 3.64211 5.35229   1
 -12  -3   0 7.28533 6.62570   2
  12  -3   0 -2.5767 5.25983   1
  12   3   0 2.47192 4.90814   4
  12   3   0 0.50054 5.05796   1
 -13  -3   0 38.9302 8.86447   1
  13  -3   0 47.5783 10.3615   1
 -13  -3   0 40.3655 10.6531   2
  13   3   0 46.2215 9.40661   1
  13   3   0 55.7482 10.4376   4
  14  -3   0 17.0077 7.86143   1
 -14  -3   0 5.09080 7.99149   2
 -14  -3   0 10.3155 7.29085   1
  14   3   0 22.9621 7.19084   1
  14   3   0 13.7083 7.63039   4
   0  -4   0 23.7387 3.13921   2
   0  -4   0 29.4335 3.82408   1
   0   4   0 23.8644 3.62809   4
   1  -4   0 62.8558 4.93501   1
  -1  -4   0 54.9890 4.35072   2
  -1  -4   0 63.2166 5.29861   1
   1  -4   0 59.8762 4.03400   2
  -1   4   0 62.4071 5.31356   4
   1   4   0 64.9610 5.65345   4
   1   4   0 59.5059 4.54898   1
  -2  -4   0 510.522 13.6489   1
   2  -4   0 516.263 12.8483   1
  -2  -4   0 493.936 12.9680   2
   2   4   0 517.754 12.7855   1
   2   4   0 490.695 13.4763   4
  -2   4   0 496.562 13.1466   4
  -3  -4   0 597.569 15.7666   1
   3  -4   0 604.240 14.9118   1
  -3  -4   0 561.583 15.2536   2
  -3   4   0 590.405 15.2229   4
   3   4   0 607.478 15.0428   1
   3   4   0 597.608 15.6645   4
  -4  -4   0 220.224 10.4167   2
   4  -4   0 257.472 10.0494   1
  -4  -4   0 243.430 10.6205   1
   4   4   0 217.214 10.1842   4
  -4   4   0 244.017 10.0995   4
   4   4   0 236.711 9.89828   1
  -5  -4   0 54.9932 7.35069   1
   5  -4   0 55.5047 6.03020   1
  -5  -4   0 54.2417 6.72313   2
   5   4   0 52.5381 6.56551   4
  -5   4   0 49.7032 6.17368   4
   5   4   0 46.2379 6.04327   1
   6  -4   0 473.943 15.5703   1
  -6  -4   0 448.830 17.2534   2
  -6  -4   0 444.288 16.2279   1
  -6   4   0 417.397 15.2889   4
   6   4   0 441.925 16.0415   4
   6   4   0 442.033 15.3565   1
   7  -4   0 181.174 10.9887   1
  -7  -4   0 186.484 11.7401   1
  -7  -4   0 191.674 12.6479   2
   7   4   0 201.351 11.9501   4
  -7   4   0 189.031 11.2612   4
   7   4   0 173.896 10.6484   1
  -8  -4   0 40.5825 7.98850   2
  -8  -4   0 33.5443 7.00449   1
   8  -4   0 54.2555 8.34843   1
   8   4   0 48.2398 7.84120   4
  -8   4   0 35.7975 6.83405   4
   8   4   0 44.1051 7.47738   1
  -9  -4   0 3.39561 5.34537   2
  -9  -4   0 5.94028 5.02389   1
   9  -4   0 0.65074 4.94610   1
   9   4   0 2.76341 4.78340   4
   9   4   0 6.93944 5.12537   1
  -9   4   0 -0.3458 4.09956   4
 -10  -4   0 49.0502 9.95421   2
  10  -4   0 46.8210 8.00714   1
 -10  -4   0 52.3341 9.28972   1
  10   4   0 49.4403 8.99490   1
 -10   4   0 62.6591 9.62190   4
  10   4   0 51.3203 8.90791   4
  11  -4   0 2.75750 4.83003   1
 -11  -4   0 7.75086 6.65138   2
 -11  -4   0 2.03210 5.27743   1
  11   4   0 0.50447 4.50823   1
  11   4   0 13.2853 6.30022   4
 -12  -4   0 23.1571 8.07214   1
 -12  -4   0 49.3579 11.1499   2
  12  -4   0 30.3792 8.32037   1
  12   4   0 47.5603 9.65824   4
  12   4   0 35.2290 7.86987   1
 -13  -4   0 135.334 17.4703   2
 -13  -4   0 127.408 15.2876   1
  13  -4   0 152.811 15.7131   1
  13   4   0 172.395 17.5590   4
  13   4   0 119.141 14.9946   1
 -14  -4   0 -3.6923 5.55833   1
 -14  -4   0 10.3489 8.56643   2
  14  -4   0 -5.5630 5.68242   1
  14   4   0 -11.155 5.70977   4
  14   4   0 -4.1026 4.52039   1
   0  -5   0 0.05701 1.96127   2
   0  -5   0 3.18234 2.61278   1
   0   5   0 0.88058 2.47801   4
   1  -5   0 7.38490 2.37171   2
   1  -5   0 10.2437 3.07921   1
  -1  -5   0 16.0974 3.17712   2
  -1  -5   0 8.37709 3.25296   1
  -1   5   0 4.31445 2.79798   4
   1   5   0 10.9688 3.20953   4
  -2  -5   0 719.847 16.9226   2
   2  -5   0 691.988 15.0165   2
   2  -5   0 711.793 17.1354   1
  -2  -5   0 705.876 17.8615   1
   2   5   0 729.089 18.1269   4
  -2   5   0 723.225 21.7522   1
   2   5   0 720.306 16.5460   1
  -2   5   0 713.004 17.6289   4
  -3  -5   0 344.089 12.7094   1
  -3  -5   0 339.814 12.1037   2
   3  -5   0 335.999 11.6756   1
   3   5   0 333.460 12.5277   4
  -3   5   0 347.679 12.2833   4
   3   5   0 324.407 11.4175   1
  -4  -5   0 98.8866 8.75948   1
  -4  -5   0 108.635 7.88343   2
   4  -5   0 109.016 7.40550   1
   4   5   0 105.563 7.96645   4
   4   5   0 107.767 7.36776   1
  -4   5   0 109.580 7.79158   4
  -5  -5   0 103.978 9.65665   2
   5  -5   0 112.282 8.08718   1
  -5  -5   0 111.558 8.72270   1
  -5   5   0 120.183 8.64726   4
   5   5   0 118.223 9.02293   4
   5   5   0 116.547 8.14838   1
  -6  -5   0 109.173 10.3138   2
   6  -5   0 122.170 10.0184   1
  -6  -5   0 129.480 10.0319   1
  -6   5   0 127.587 9.39003   4
   6   5   0 119.146 10.4465   4
   6   5   0 111.393 8.65258   1
   7  -5   0 1002.72 26.1178   1
  -7  -5   0 974.853 27.3013   1
  -7  -5   0 1006.79 28.5761   2
   7   5   0 982.815 27.1946   4
   7   5   0 961.443 25.6148   1
  -7   5   0 973.039 26.6736   4
  -8  -5   0 -0.6976 4.55102   2
   8  -5   0 -1.2946 4.16304   1
  -8  -5   0 5.45546 4.87211   1
   8   5   0 4.38023 3.75958   1
  -8   5   0 -1.5278 3.84977   4
   8   5   0 -6.2862 3.53207   4
  -9  -5   0 721.912 25.4629   1
   9  -5   0 729.248 24.3431   1
  -9  -5   0 722.208 27.0111   2
   9   5   0 757.310 25.5852   4
   9   5   0 701.798 23.7659   1
  -9   5   0 723.630 24.7917   4
 -10  -5   0 -5.4997 4.78944   2
 -10  -5   0 5.04773 5.19189   1
  10  -5   0 5.35357 4.93972   1
  10   5   0 4.90287 5.22730   4
 -10   5   0 12.9457 5.74556   4
  10   5   0 10.2174 5.33244   1
 -11  -5   0 93.5290 13.6282   2
  11  -5   0 121.336 14.0196   1
 -11  -5   0 96.8759 12.5751   1
  11   5   0 129.683 14.5788   4
  11   5   0 115.809 12.7813   1
 -11   5   0 105.119 12.7559   4
 -12  -5   0 22.1541 8.76777   2
  12  -5   0 38.9542 8.74985   1
 -12  -5   0 41.6801 9.85327   1
  12   5   0 19.6059 7.43220   1
  12   5   0 19.8274 7.64345   4
 -13  -5   0 38.9184 10.3636   2
 -13  -5   0 47.6844 9.99476   1
  13  -5   0 42.2179 10.1514   1
  13   5   0 84.8006 12.7273   1
  13   5   0 71.7883 12.4766   4
   0  -6   0 346.341 12.3708   1
   0  -6   0 353.296 10.6526   2
   0   6   0 320.689 12.3127   4
  -1  -6   0 573.990 16.5773   1
   1  -6   0 583.798 16.2826   1
  -1  -6   0 549.962 14.4256   2
   1  -6   0 592.836 13.9510   2
  -1   6   0 555.735 16.3521   4
  -1   6   0 550.565 13.5691   1
   1   6   0 570.000 16.7272   4
  -2  -6   0 305.819 11.1276   2
   2  -6   0 304.388 9.93650   2
  -2  -6   0 303.061 12.3058   1
   2  -6   0 319.183 11.8709   1
  -2   6   0 299.748 9.66676   1
   2   6   0 303.209 10.9433   1
   2   6   0 301.317 12.4916   4
  -2   6   0 290.881 12.0119   4
  -3  -6   0 11.0760 4.30596   1
   3  -6   0 6.44516 3.43042   1
  -3  -6   0 11.5199 3.66675   2
  -3   6   0 7.97075 3.65298   4
   3   6   0 7.91445 3.80814   4
   3   6   0 12.9639 3.55600   1
  -3   6   0 8.66201 2.83719   1
  -4  -6   0 226.720 11.8563   1
  -4  -6   0 251.362 11.8772   2
   4  -6   0 241.316 11.3837   1
  -4   6   0 251.315 9.45348   1
   4   6   0 238.149 10.9778   1
   4   6   0 251.739 12.3376   4
  -4   6   0 247.527 11.9677   4
  -5  -6   0 302.647 14.4702   1
  -5  -6   0 254.911 12.8933   2
   5  -6   0 294.367 12.9815   1
   5   6   0 278.826 12.3088   1
  -5   6   0 305.469 10.8166   1
  -5   6   0 294.976 13.4617   4
   5   6   0 306.799 14.2409   4
   6  -6   0 268.153 13.4483   1
  -6  -6   0 315.341 15.2646   2
  -6  -6   0 270.374 14.6523   1
   6   6   0 307.875 15.1763   4
  -6   6   0 273.582 11.1346   1
  -6   6   0 313.739 14.6380   4
   6   6   0 281.409 13.2794   1
  -7  -6   0 876.468 27.5246   2
  -7  -6   0 910.529 27.2756   1
   7  -6   0 871.796 25.2239   1
   7   6   0 900.626 26.7459   4
  -7   6   0 836.669 25.3780   4
   7   6   0 872.571 24.6555   1
  -8  -6   0 3.78063 4.94036   1
   8  -6   0 6.26129 4.28841   1
  -8  -6   0 1.73062 4.96859   2
   8   6   0 9.58102 5.10297   4
   8   6   0 -5.1644 3.32923   1
  -8   6   0 0.83995 4.09710   4
  -9  -6   0 23.5779 6.90453   1
  -9  -6   0 22.6030 7.40480   2
   9  -6   0 14.2437 5.76180   1
  -9   6   0 22.0038 6.66372   4
   9   6   0 7.45231 5.68173   4
   9   6   0 18.2131 6.26581   1
 -10  -6   0 9.11369 6.55893   2
 -10  -6   0 0.55631 4.87362   1
  10  -6   0 4.38417 5.13427   1
  10   6   0 -1.6959 4.11600   1
 -10   6   0 5.03653 5.25607   4
  10   6   0 -8.8225 4.15574   4
 -11  -6   0 19.0211 8.19853   2
  11  -6   0 15.7527 6.65144   1
 -11  -6   0 11.5922 6.85156   1
  11   6   0 19.0146 6.98386   1
 -11   6   0 14.6534 6.69703   4
  11   6   0 9.28755 6.57284   4
 -12  -6   0 45.0969 10.7063   1
 -12  -6   0 35.2640 9.92593   2
 -12   6   0 34.8785 9.52843   4
  12   6   0 45.0413 10.2190   4
  12   6   0 48.9020 9.28062   1
 -13  -6   0 54.8747 12.3505   2
 -13  -6   0 41.0964 10.0711   1
  13   6   0 67.1636 12.0628   1
  13   6   0 69.6727 12.6286   4
   0  -7   0 -0.5374 2.91233   1
   0  -7   0 1.39651 2.19192   2
   0   7   0 -2.5770 2.95944   4
   1  -7   0 220.624 8.76093   2
  -1  -7   0 217.025 9.33867   2
   1  -7   0 215.326 10.8765   1
  -1  -7   0 201.170 10.7500   1
  -1   7   0 204.055 10.9785   4
   1   7   0 206.292 11.3061   4
  -1   7   0 199.002 8.34243   1
  -2  -7   0 581.241 18.5455   1
   2  -7   0 593.916 17.8969   1
  -2  -7   0 599.954 16.7192   2
   2  -7   0 562.613 14.8132   2
   2   7   0 564.650 18.5248   4
  -2   7   0 576.994 14.5164   1
  -2   7   0 595.294 18.7231   4
  -3  -7   0 318.735 12.9475   2
   3  -7   0 337.005 13.7471   1
  -3  -7   0 337.290 14.6327   1
   3   7   0 319.441 12.4529   1
  -3   7   0 324.030 13.9805   4
   3   7   0 329.050 14.6497   4
  -3   7   0 332.229 10.7200   1
  -4  -7   0 437.470 16.1164   2
   4  -7   0 400.999 15.6863   1
  -4  -7   0 437.944 17.2479   1
  -4   7   0 443.293 16.8060   4
  -4   7   0 432.948 12.6420   1
   4   7   0 396.640 14.5208   1
   4   7   0 419.437 16.8238   4
  -5  -7   0 17.9942 5.72981   1
  -5  -7   0 18.1775 5.15142   2
   5  -7   0 16.8870 5.18996   1
  -5   7   0 14.5216 3.70588   1
   5   7   0 10.2437 5.06572   4
   5   7   0 8.46414 4.08909   1
  -5   7   0 10.5296 4.83915   4
   6  -7   0 450.145 17.8631   1
  -6  -7   0 435.076 18.3749   2
  -6  -7   0 424.603 18.6161   1
  -6   7   0 442.959 18.2641   4
   6   7   0 448.976 19.1443   4
   6   7   0 452.552 16.9556   1
   7  -7   0 62.7880 9.29706   1
  -7  -7   0 37.1035 8.09827   2
  -7  -7   0 39.8559 7.60738   1
  -7   7   0 48.9568 7.99149   4
   7   7   0 35.8415 7.49598   4
   7   7   0 39.9108 6.84389   1
  -8  -7   0 44.6374 8.88543   2
  -8  -7   0 37.2647 8.32186   1
   8  -7   0 53.0180 9.08900   1
   8   7   0 34.5994 8.12433   4
   8   7   0 49.3485 8.12633   1
  -8   7   0 45.7842 8.53077   4
  -9  -7   0 81.7170 11.5714   2
   9  -7   0 100.317 12.9100   1
  -9  -7   0 70.4058 10.4961   1
   9   7   0 77.9960 10.0195   1
  -9   7   0 96.2194 12.2534   4
   9   7   0 83.4052 11.3756   4
 -10  -7   0 308.313 19.4327   1
 -10  -7   0 358.284 20.8518   2
  10   7   0 325.557 19.5125   4
  10   7   0 308.438 17.0728   1
 -10   7   0 294.815 18.1392   4
 -11  -7   0 10.6201 6.89356   2
 -11  -7   0 6.80556 6.26984   1
  11   7   0 14.6835 6.42988   1
 -11   7   0 13.1900 6.42681   4
  11   7   0 34.5445 9.38616   4
 -12  -7   0 136.677 15.7795   1
 -12  -7   0 171.783 18.8054   2
  12   7   0 171.465 16.2488   1
 -12   7   0 154.601 17.2885   4
  12   7   0 155.479 17.4807   4
   0  -8   0 43.1090 6.83633   1
   0  -8   0 27.2858 4.65697   2
   0   8   0 38.6802 6.59667   4
  -1  -8   0 265.295 13.1856   1
   1  -8   0 247.832 9.90740   2
  -1  -8   0 258.810 10.8588   2
   1  -8   0 258.109 12.8997   1
  -1   8   0 252.303 13.1614   4
   1   8   0 247.390 13.1190   4
  -2  -8   0 89.0171 8.37482   2
   2  -8   0 82.0411 7.08160   2
   2  -8   0 93.0843 9.88548   1
  -2  -8   0 76.2441 8.73808   1
  -2   8   0 77.6354 5.97826   1
   2   8   0 79.0742 9.24085   4
  -2   8   0 101.894 10.5388   4
  -3  -8   0 57.4090 7.28418   2
   3  -8   0 54.7970 7.49007   1
  -3  -8   0 34.3962 6.71307   1
  -3   8   0 45.3597 7.18671   4
  -3   8   0 50.0203 5.41995   1
   3   8   0 51.1223 6.52831   1
   3   8   0 42.0299 7.32289   4
   4  -8   0 217.260 12.5563   1
  -4  -8   0 231.576 12.7077   2
  -4  -8   0 264.135 14.3725   1
   4   8   0 214.133 13.6094   4
  -4   8   0 221.957 9.14951   1
  -4   8   0 265.239 14.1980   4
   4   8   0 258.158 12.2202   1
   5  -8   0 9.79948 4.67704   1
  -5  -8   0 3.30071 4.18345   1
  -5  -8   0 2.03430 4.30112   2
   5   8   0 5.40727 5.28496   4
  -5   8   0 -1.2227 3.83974   4
   5   8   0 3.15462 4.07824   1
  -6  -8   0 -0.9979 3.45507   2
  -6  -8   0 -0.1121 4.07836   1
   6  -8   0 1.17801 4.53530   1
   6   8   0 -4.4050 4.22707   4
  -6   8   0 -2.7424 3.73801   4
   6   8   0 2.29966 3.60279   1
  -7  -8   0 10.8180 5.77867   2
  -7  -8   0 9.20039 5.79619   1
   7   8   0 19.2222 6.90097   4
   7   8   0 10.2821 4.91613   1
  -7   8   0 8.00011 5.39576   4
  -8  -8   0 72.6064 10.8173   2
  -8  -8   0 88.0966 11.5129   1
   8   8   0 79.3616 11.4489   4
   8   8   0 64.2297 8.87235   1
  -8   8   0 63.0733 10.0827   4
  -9  -8   0 74.3935 11.6025   2
  -9  -8   0 69.5640 11.0556   1
   9   8   0 68.6547 11.4795   4
   9   8   0 49.0426 8.41206   1
  -9   8   0 60.3307 10.2393   4
 -10  -8   0 2.82094 6.05021   1
 -10  -8   0 -7.1552 4.70463   2
  10   8   0 -9.6435 4.97267   4
  10   8   0 5.33261 5.56268   1
 -10   8   0 3.68474 5.84426   4
 -11  -8   0 -5.2692 5.79714   2
 -11  -8   0 10.4413 7.01177   1
 -11   8   0 11.4105 7.06541   4
  11   8   0 16.5702 6.78126   1
  11   8   0 14.4259 8.14421   4
   0  -9   0 -4.8951 3.61552   1
   0  -9   0 -0.9850 2.81015   2
   0   9   0 3.80707 4.52519   4
  -1  -9   0 1.12524 3.10012   2
   1  -9   0 8.53275 4.48273   1
  -1  -9   0 4.46935 4.49455   1
   1  -9   0 3.44636 3.02479   2
  -1   9   0 -1.8357 3.83994   4
   1   9   0 6.13682 4.92936   4
  -2  -9   0 194.438 12.5843   1
   2  -9   0 170.751 11.8766   1
  -2  -9   0 168.870 10.1823   2
   2   9   0 171.607 12.6546   4
  -2   9   0 170.021 12.6406   4
  -3  -9   0 83.9637 8.90321   2
   3  -9   0 63.7785 9.11952   1
  -3  -9   0 73.7041 9.35216   1
  -3   9   0 79.7390 9.83761   4
   3   9   0 67.1645 9.44744   4
  -4  -9   0 401.908 18.6557   1
  -4  -9   0 377.005 15.9867   2
  -4   9   0 381.070 17.8441   4
   4   9   0 403.963 15.4962   1
   4   9   0 375.246 18.0994   4
  -5  -9   0 101.963 12.7170   1
  -5  -9   0 73.8475 9.40549   2
  -5   9   0 82.4570 10.0708   4
   5   9   0 76.1513 8.78570   1
   5   9   0 74.4897 10.5056   4
  -6  -9   0 4.90025 5.00406   2
  -6  -9   0 6.47852 5.04739   1
  -6   9   0 9.74730 5.57130   4
   6   9   0 5.93923 4.07002   1
   6   9   0 -5.6092 4.20822   4
  -7  -9   0 49.5029 9.50604   2
  -7  -9   0 55.0708 9.50662   1
  -7   9   0 44.0162 9.05729   4
   7   9   0 45.8897 9.19516   4
   7   9   0 59.6398 8.44573   1
  -8  -9   0 147.897 15.2627   2
  -8  -9   0 101.379 12.5053   1
  -8   9   0 128.860 14.0808   4
   8   9   0 113.791 11.7139   1
   8   9   0 136.009 15.2749   4
  -9  -9   0 6.23165 6.59118   1
  -9  -9   0 4.95764 6.22236   2
   9   9   0 -0.3265 4.44099   1
   9   9   0 5.42252 6.63721   4
  -9   9   0 2.57411 5.88285   4
 -10  -9   0 18.0882 7.37759   1
 -10  -9   0 43.9642 10.4384   2
  10   9   0 46.9491 10.5721   4
 -10   9   0 49.5286 10.4449   4
  10   9   0 46.5572 8.55330   1
   0 -10   0 229.336 13.6241   2
   0  10   0 243.536 14.9931   4
  -1 -10   0 8.42812 6.13771   1
  -1 -10   0 6.28644 3.67632   2
  -1  10   0 2.60626 4.60647   4
   1  10   0 1.29656 4.59578   4
  -2 -10   0 20.6261 5.07343   2
  -2 -10   0 16.1325 5.79706   1
   2  10   0 20.6384 6.65165   4
  -2  10   0 22.6466 6.50819   4
  -3 -10   0 59.0495 7.91499   2
  -3 -10   0 53.6688 8.83693   1
  -3  10   0 53.7850 9.05653   4
   3  10   0 32.8674 7.89153   4
  -4 -10   0 13.6084 5.17013   2
  -4 -10   0 25.9387 7.33398   1
  -4  10   0 8.05738 5.60224   4
   4  10   0 12.9799 5.93035   4
  -5 -10   0 8.73613 5.94639   1
  -5 -10   0 2.87764 4.61453   2
   5  10   0 15.6785 6.21176   4
  -5  10   0 11.1475 5.78154   4
  -6 -10   0 104.384 14.2489   1
  -6 -10   0 99.8457 11.8184   2
   6  10   0 89.8489 12.5299   4
   6  10   0 84.4623 9.77552   1
  -6  10   0 89.3802 11.7598   4
  -7 -10   0 5.98244 5.60607   1
  -7 -10   0 4.99218 5.67223   2
   7  10   0 0.68640 5.84623   4
   7  10   0 9.08420 5.01549   1
  -7  10   0 8.87860 6.32193   4
  -8 -10   0 1.35306 5.41088   1
  -8 -10   0 -2.8096 5.32222   2
   8  10   0 -1.1784 6.11347   4
   8  10   0 -3.5129 3.53370   1
  -8  10   0 13.0662 6.26223   4
  -9 -10   0 101.567 13.6006   2
  -9 -10   0 61.9730 11.5802   1
   9  10   0 86.2007 13.5353   4
  -9  10   0 76.9252 12.4984   4
   9  10   0 75.9856 10.2887   1
   0  11   0 0.94110 4.78775   4
   1  11   0 4.59474 5.26290   4
  -1  11   0 5.29335 5.49424   4
   2  11   0 83.2897 11.3453   4
  -2  11   0 81.6668 11.0734   4
   3  11   0 121.620 13.7928   4
  -3  11   0 116.548 13.3848   4
  -4  11   0 1.79843 5.03480   4
   4  11   0 8.46941 6.24072   4
  -5 -11   0 126.514 13.2715   2
   5  11   0 113.195 13.9130   4
  -5  11   0 111.836 13.1101   4
  -6 -11   0 89.2810 11.4006   2
   6  11   0 73.0926 12.0993   4
  -6  11   0 75.4263 12.1250   4
  -7 -11   0 6.52646 5.79954   2
  -7  11   0 2.01266 5.73202   4
   7  11   0 6.01446 6.75515   4
   7  11   0 -0.8148 4.25740   1
  -8 -11   0 71.1354 12.2414   2
   8  11   0 75.9958 13.3945   4
   8  11   0 71.6889 9.88337   1
  -8  11   0 81.2281 12.4713   4
   0  12   0 60.4885 10.9484   4
  -1  12   0 4.07981 5.71014   4
   1  12   0 10.2264 6.49115   4
   2  12   0 121.776 14.4128   4
  -2  12   0 107.572 13.7964   4
  -3  12   0 6.31724 5.77463   4
   3  12   0 5.43220 5.82066   4
  -4  12   0 68.1878 11.2286   4
   4  12   0 53.9640 10.7154   4
   5  12   0 21.1296 8.42523   4
  -5  12   0 23.8973 7.82291   4
   0  13   0 -0.5039 5.94749   4
  -1  13   0 33.8801 9.28001   4
   1  13   0 37.8672 9.83986   4
  14   0  -1 4.23015 6.27077   1
  13   0  -1 7.32641 6.37028   4
  13   0  -1 38.4652 9.71479   1
  12   0  -1 1.30194 4.52523   4
  12   0  -1 -0.0225 4.76624   1
  11   0  -1 195.871 13.9463   1
  10   0  -1 -5.8994 3.86832   1
   9   0  -1 4.70307 4.09108   1
   8   0  -1 0.40138 3.28607   1
   7   0  -1 3.84741 3.26850   1
   6   0  -1 4.28140 3.28019   1
   5   0  -1 3011.46 46.0110   1
   4   0  -1 -3.5932 1.94821   1
   3   0  -1 763.740 15.0351   1
   2   0  -1 -1.4098 1.36941   1
   1   0  -1 2045.88 26.0080   1
  -1   0   1 2012.72 26.1340   4
   0   0  -1 0.30087 0.79018   3
   0   0  -1 -1.0059 0.62397   2
   0   0  -1 -1.0663 0.44171   4
  -1   0  -1 3971.07 48.4431   1
   1   0   1 4107.87 49.5079   1
   1   0   1 4045.42 48.6744   4
  -1   0  -1 3974.34 49.9354   2
  -2   0  -1 -0.4364 1.37496   1
   2   0   1 -1.3032 1.27592   4
   2   0   1 -1.5882 1.30894   1
   3   0   1 1759.04 26.7469   1
   3   0   1 1763.29 26.7019   4
   4   0   1 1.26010 2.32157   1
   4   0   1 -0.8226 2.00278   4
   5   0   1 357.101 11.1390   4
   5   0   1 339.779 11.4188   1
   6   0   1 2.69452 2.72923   1
   6   0   1 -3.0528 2.29045   4
   7   0   1 1.34033 2.69200   4
   7   0   1 -0.5490 2.60621   1
   8   0   1 3.43244 3.49365   1
   8   0   1 2.04458 3.36796   4
   9   0   1 80.7753 8.82010   4
   9   0   1 108.570 10.1816   1
  10   0   1 1.00910 4.48091   1
  10   0   1 1.34821 3.92000   4
  11   0   1 37.6833 7.77645   1
 -11   0  -1 42.6615 7.82808   1
  11   0   1 46.9532 8.13462   4
  12   0   1 -2.4321 4.72220   4
 -12   0  -1 -0.7689 4.74904   1
  12   0   1 -6.5028 4.35478   1
  13   0   1 116.279 14.1343   1
 -13   0  -1 124.889 14.0793   1
 -14   0  -1 3.43206 5.48294   1
 -14   0  -1 2.01653 6.71746   2
  14   0   1 -0.7652 6.17172   1
  14  -1  -1 -3.7697 5.21978   1
  14   1  -1 3.90232 6.35525   4
  14   1  -1 -0.3078 5.89425   1
  13  -1  -1 71.2821 11.2165   1
  13   1  -1 78.3705 12.7132   1
  13   1  -1 78.8463 11.7184   4
  12  -1  -1 20.1648 7.15718   1
  12   1  -1 28.8935 7.40262   1
  12   1  -1 23.8486 7.40813   4
  11  -1  -1 36.2834 7.39460   1
  11   1  -1 31.3820 7.31248   4
  11   1  -1 28.8216 7.04905   1
  10  -1  -1 3.62568 4.67586   1
  10   1  -1 1.34574 2.64664   3
  10   1  -1 1.27501 4.16817   1
   9  -1  -1 292.976 14.6377   1
   9   1  -1 290.650 10.1292   3
   9   1  -1 272.343 14.2158   1
   8  -1  -1 105.131 9.99588   1
   8   1  -1 105.166 6.27494   3
   8   1  -1 115.228 10.4379   1
   7  -1  -1 55.9094 7.36948   1
   7   1  -1 34.2167 5.39496   1
   6  -1  -1 76.5174 7.02002   1
   6   1  -1 74.1873 7.24839   1
   5  -1  -1 1290.00 25.2942   1
  -5   1   1 1303.28 25.7247   4
   5   1  -1 1312.97 25.1738   1
   5   1  -1 1354.19 21.3249   3
   4  -1  -1 74.5178 5.41929   1
   4   1  -1 74.7198 5.40710   1
  -4   1   1 66.8761 5.61013   4
   4   1  -1 84.7628 4.13011   3
   3  -1  -1 725.037 14.7512   1
  -3   1   1 718.129 14.8002   4
   3   1  -1 707.648 12.4183   3
   3   1  -1 723.583 14.3103   1
   2  -1  -1 1847.44 26.7139   1
   2   1  -1 1817.85 25.0532   3
   2   1  -1 1848.98 25.8997   1
   1  -1  -1 134.312 4.50572   2
  -1   1   1 129.481 4.36573   4
   1   1  -1 137.182 3.33222   1
   0  -1  -1 50.4129 2.69286   2
   0  -1  -1 53.6260 2.61844   1
   0   1   1 58.3065 2.67320   1
   0   1   1 56.5243 2.66975   4
  -1  -1  -1 371.956 8.27185   2
  -1  -1  -1 382.678 7.84472   1
   1   1   1 361.524 7.59994   1
   1   1   1 371.668 7.78712   4
  -1   1  -1 392.269 6.04783   4
   2  -1   1 376.610 7.72332   1
  -2  -1  -1 364.191 5.49802   3
  -2  -1  -1 366.485 8.88540   1
  -2   1  -1 381.256 8.02376   4
  -2   1  -1 378.000 7.30126   1
   2   1   1 378.560 8.87816   4
   2   1   1 367.639 8.72278   1
   3  -1   1 1065.53 17.9271   1
  -3  -1  -1 1041.30 18.9493   1
  -3  -1  -1 1029.09 20.3686   2
   3   1   1 1048.80 18.7889   1
   3   1   1 1022.43 18.7915   4
  -3   1  -1 1040.78 18.0305   4
  -4  -1  -1 179.458 7.94667   1
   4  -1   1 189.388 7.42100   1
   4   1   1 184.125 7.83672   4
  -4   1  -1 171.817 7.40361   4
   4   1   1 183.884 7.88388   1
   5  -1   1 3337.12 49.1685   1
   5   1   1 3351.56 50.1764   1
   5   1   1 3260.29 49.5354   4
   6  -1   1 32.8783 5.17918   1
   6   1   1 28.6009 5.06095   1
   6   1   1 29.0389 4.76091   4
   7  -1   1 0.24117 2.99833   1
   7   1   1 -0.0300 2.82947   1
   7   1   1 3.71936 3.27814   4
   8  -1   1 93.1304 8.82877   1
   8   1   1 86.2872 8.62737   1
   8   1   1 88.2889 8.85031   4
  -9  -1  -1 213.472 12.8548   1
   9  -1   1 216.546 12.0244   4
   9  -1   1 225.974 13.1271   1
   9   1   1 206.270 12.9606   1
   9   1   1 221.898 12.6232   4
  10  -1   1 2.31103 4.26906   1
  10  -1   1 -4.3487 3.65469   4
 -10  -1  -1 8.32102 5.42892   1
  10   1   1 7.13091 5.08591   1
  10   1   1 5.87065 4.75588   4
  11  -1   1 30.1477 7.44425   1
  11  -1   1 40.5104 7.74283   4
 -11  -1  -1 19.2921 6.68905   1
  11   1   1 16.7216 6.23522   4
  11   1   1 22.4428 6.40270   1
 -12  -1  -1 18.6966 6.67986   1
  12  -1   1 26.5512 7.38119   1
 -12   1  -1 24.6083 6.84920   1
  12   1   1 22.1560 7.37733   1
  12   1   1 14.7229 6.24248   4
 -13  -1  -1 4.98694 5.79756   1
 -13  -1  -1 2.02641 6.59920   2
  13  -1   1 -1.0302 5.08844   1
  13   1   1 16.3972 8.04397   1
 -13   1  -1 -6.1359 4.42472   1
 -14  -1  -1 11.2033 7.97955   2
  14  -1   1 28.9792 9.71097   1
 -14  -1  -1 16.0901 7.31109   1
  14   1   1 28.2703 9.11734   1
 -14   1  -1 8.34395 5.92587   1
  14  -2  -1 229.726 18.1714   1
 -14  -2   1 178.738 17.4023   1
  14   2  -1 228.331 17.6097   4
  14   2  -1 249.554 18.1186   1
  13  -2  -1 -1.9439 5.27432   1
  13   2  -1 5.12566 5.63154   1
  13   2  -1 6.95430 6.06984   4
  12  -2  -1 1.35427 4.79964   1
  12   2  -1 2.76915 5.10873   4
  12   2  -1 -1.3772 4.77215   1
  11  -2  -1 204.098 14.3325   1
  11   2  -1 180.256 13.4665   1
  11   2  -1 226.016 14.9624   4
  10  -2  -1 182.526 12.9338   1
  10   2  -1 191.176 12.9513   1
  10   2  -1 170.381 12.5932   4
   9  -2  -1 301.552 14.9487   1
   9   2  -1 287.483 14.5375   4
   9   2  -1 285.801 8.31920   3
   9   2  -1 257.817 13.9216   1
   8  -2  -1 14.6909 4.66377   1
   8   2  -1 14.1085 4.61584   1
   8   2  -1 14.8649 2.69488   3
   7  -2  -1 283.050 12.5864   1
   7   2  -1 298.721 8.00684   3
  -7   2   1 270.904 12.8248   4
   7   2  -1 305.849 12.7962   1
   6  -2  -1 790.901 20.0839   1
   6   2  -1 809.127 19.9969   1
   6   2  -1 800.184 14.4115   3
  -6   2   1 794.312 20.3312   4
   5  -2  -1 419.264 13.1924   1
  -5   2   1 428.984 13.5285   4
   5   2  -1 425.606 9.33800   3
   5   2  -1 437.467 13.1153   1
   4  -2  -1 642.275 15.4686   1
   4   2  -1 641.318 15.0365   1
  -4   2   1 651.575 15.8872   4
   3  -2  -1 1857.28 29.6646   1
  -3   2   1 1849.95 29.8362   4
   3   2  -1 1883.31 28.7540   1
   2  -2  -1 210.002 7.26841   1
  -2   2   1 215.559 7.48773   4
   2   2  -1 210.247 6.38463   1
   1  -2  -1 3032.53 41.3573   2
   1  -2  -1 3135.60 41.6895   1
  -1   2   1 3111.64 41.8698   4
   1   2  -1 3099.36 39.9875   4
   1   2  -1 3093.68 38.7563   1
   0   2   1 9999.99 121.192   4
  -1  -2  -1 1964.10 28.9458   1
  -1  -2  -1 1962.55 29.0167   2
   1   2   1 1973.51 28.6793   1
   1   2   1 1993.72 28.9677   4
  -1   2  -1 1976.46 26.1428   4
  -2  -2  -1 519.351 12.0616   1
  -2  -2  -1 513.946 12.3891   2
  -2   2  -1 513.626 8.80462   1
  -2   2  -1 523.377 10.4463   4
   2   2   1 511.757 11.8949   4
   3  -2   1 29.5210 3.38654   1
  -3  -2  -1 22.9473 3.68252   1
  -3  -2  -1 33.9434 4.59673   2
  -3   2  -1 25.0966 2.92962   1
   3   2   1 22.9941 3.60330   4
   3   2   1 26.8652 3.65996   1
  -3   2  -1 27.8678 3.39763   4
  -4  -2  -1 125.886 7.32604   1
  -4  -2  -1 129.551 7.99967   2
   4  -2   1 134.500 6.47273   1
   4   2   1 138.613 7.37128   4
  -4   2  -1 134.730 6.74225   4
   4   2   1 129.011 7.12326   1
  -5  -2  -1 360.127 13.7084   2
  -5  -2  -1 359.061 12.5681   1
   5  -2   1 359.220 11.5151   1
   5   2   1 356.400 12.2709   4
  -5   2  -1 330.734 11.3937   4
   5   2   1 350.355 12.1302   1
  -6  -2  -1 116.556 8.32594   1
  -6  -2  -1 141.619 9.69332   2
   6  -2   1 121.388 7.67643   1
   6   2   1 119.415 8.13200   1
  -6   2  -1 127.638 7.95733   4
   6   2   1 133.998 8.59803   4
   7  -2   1 85.1759 7.73227   1
  -7  -2  -1 92.4532 9.12752   1
   7   2   1 83.9451 7.94289   1
   7   2   1 90.1263 8.51864   4
   8  -2   1 337.872 14.6160   1
  -8  -2  -1 334.669 15.1380   1
   8   2   1 350.477 14.8139   4
   8   2   1 358.038 15.2650   1
  -9  -2  -1 17.5707 5.80375   1
  -9  -2  -1 40.1310 8.14112   2
   9  -2   1 39.3506 7.19417   1
   9   2   1 35.9131 7.04626   4
   9   2   1 29.2274 6.20929   1
 -10  -2  -1 2.04164 5.22700   2
 -10  -2  -1 0.66879 4.32048   1
  10  -2   1 -1.8658 4.22432   1
  10   2   1 2.71935 4.21256   1
  10   2   1 -1.0902 4.13511   4
 -11  -2  -1 141.609 15.6417   2
 -11  -2  -1 132.771 13.7182   1
  11  -2   1 141.185 13.4766   1
  11   2   1 141.241 13.2036   4
  11   2   1 148.144 15.0500   1
 -12  -2  -1 132.263 14.3515   1
  12  -2   1 131.209 13.7803   1
 -12  -2  -1 115.180 15.2641   2
  12   2   1 91.7120 11.6616   4
  12   2   1 103.542 13.7888   1
 -13  -2  -1 68.7226 12.6981   2
  13  -2   1 91.7281 13.5260   1
 -13  -2  -1 72.5189 11.1819   1
  13   2   1 81.2258 12.2501   1
  13   2   1 77.2466 11.4480   4
 -13   2  -1 63.9804 9.60505   1
  14  -2   1 102.010 14.2415   1
 -14  -2  -1 92.1853 15.3249   2
 -14  -2  -1 111.025 14.6364   1
  14   2   1 121.627 16.2904   1
 -14   2  -1 98.3610 12.4492   1
  14  -3  -1 96.9238 14.2536   1
 -14  -3   1 71.0373 13.6901   2
 -14  -3   1 57.2483 11.3060   1
  14   3  -1 66.4336 10.8032   1
  14   3  -1 78.0498 12.8652   4
 -13  -3   1 38.5602 10.5750   2
 -13  -3   1 24.6102 8.37608   1
  13  -3  -1 41.7616 8.95007   1
  13   3  -1 32.5388 7.89162   1
  13   3  -1 35.3043 8.99142   4
  12  -3  -1 171.745 15.6421   1
 -12  -3   1 161.961 16.7070   1
  12   3  -1 161.367 15.2973   4
  12   3  -1 181.899 17.1818   1
  11  -3  -1 36.1559 8.47601   1
  11   3  -1 44.3252 8.72802   4
  11   3  -1 57.5308 9.92953   1
  10  -3  -1 341.192 17.2918   1
  10   3  -1 364.248 17.2220   1
  10   3  -1 361.903 17.5951   4
   9   3  -1 2010.97 41.9158   1
   9   3  -1 1964.25 42.2492   4
  -9   3   1 2027.53 43.4033   4
   8  -3  -1 -1.8952 3.62486   1
   8   3  -1 11.0809 4.92173   1
   8   3  -1 1.97476 3.87717   4
  -8   3   1 1.62303 3.81370   4
   7  -3  -1 87.3619 8.28057   1
   7   3  -1 98.1697 9.06990   4
  -7   3   1 100.902 9.48501   4
   7   3  -1 113.876 8.55202   1
   6  -3  -1 3.22801 3.61362   1
   6   3  -1 3.66825 3.23445   4
   6   3  -1 6.54413 3.23507   1
  -6   3   1 3.76816 3.39313   4
   5  -3  -1 6.23347 3.06652   1
   5   3  -1 7.67213 3.04299   1
   5   3  -1 12.6141 3.80047   4
  -5   3   1 13.1646 3.87093   4
   4  -3  -1 50.4977 5.47858   1
   4   3  -1 40.6642 4.47830   1
   4   3  -1 54.1188 5.65467   4
  -4   3   1 55.6338 5.95638   4
   3  -3  -1 3.56100 2.54108   1
  -3   3   1 3.64902 2.76767   4
   3   3  -1 2.25422 2.33811   4
   3   3  -1 6.66402 2.55286   1
   2  -3  -1 1041.06 19.8078   1
  -2  -3   1 1061.65 19.2187   2
   2  -3  -1 1092.51 19.6870   2
  -2   3   1 1109.67 20.5425   4
   2   3  -1 1049.53 19.1410   4
   2   3  -1 1066.98 18.1055   1
  -1  -3   1 297.456 7.32602   2
   1  -3  -1 281.347 8.88773   1
   1  -3  -1 291.792 8.50082   2
  -1  -3   1 305.623 8.10643   1
  -1   3   1 289.719 9.08863   4
   1   3  -1 301.788 7.05125   1
   1   3  -1 300.757 8.11458   4
   0  -3   1 166.632 4.37106   2
   0  -3  -1 153.720 6.67234   1
   0  -3  -1 157.894 6.29571   2
   0   3  -1 171.866 5.75664   4
   0   3   1 161.040 6.55164   1
   0   3   1 171.321 7.11808   4
  -1  -3  -1 329.703 9.90858   1
  -1  -3  -1 334.630 9.60366   2
  -1   3  -1 352.311 8.36149   4
   1   3   1 319.767 9.32644   1
   1   3   1 337.492 9.92021   4
   2  -3   1 895.221 20.0761   1
  -2  -3  -1 874.448 18.2110   2
  -2  -3  -1 821.446 17.7445   1
  -2   3  -1 884.490 16.0087   4
   2   3   1 892.983 18.1660   4
  -2   3  -1 865.621 13.4449   1
   2   3   1 868.046 17.5502   1
  -3  -3  -1 182.141 8.46641   1
  -3  -3  -1 201.088 8.97718   2
   3  -3   1 195.123 7.06833   1
   3   3   1 182.346 7.90973   1
  -3   3  -1 186.996 7.33518   4
  -3   3  -1 191.173 5.94767   1
   3   3   1 187.474 8.51518   4
   4  -3   1 1102.78 21.2356   1
  -4  -3  -1 1116.80 24.5595   2
  -4  -3  -1 1125.39 23.5214   1
  -4   3  -1 1098.30 21.6057   4
  -4   3  -1 1096.33 19.2753   1
   4   3   1 1097.55 23.1587   4
   4   3   1 1140.14 23.0064   1
   5  -3   1 1.04801 2.40753   1
  -5  -3  -1 -0.7328 2.70942   1
  -5  -3  -1 1.43786 3.18718   2
   5   3   1 4.60210 2.98181   4
  -5   3  -1 -0.1023 2.50180   4
   5   3   1 1.71781 2.61227   1
  -6  -3  -1 88.8777 8.88511   2
   6  -3   1 118.554 7.85536   1
  -6  -3  -1 120.697 8.79912   1
  -6   3  -1 105.060 7.76347   4
   6   3   1 130.647 8.62550   1
   6   3   1 106.213 9.10666   4
  -7  -3  -1 416.756 17.7801   2
  -7  -3  -1 436.371 16.5030   1
   7  -3   1 409.244 15.0243   1
   7   3   1 397.934 15.4392   1
   7   3   1 397.412 15.6626   4
  -7   3  -1 431.488 15.4465   4
   8  -3   1 385.419 15.7187   1
  -8  -3  -1 421.536 19.1113   2
  -8  -3  -1 427.457 17.3556   1
   8   3   1 388.550 16.2884   1
   8   3   1 402.929 16.7431   4
  -8   3  -1 412.617 16.6165   4
  -9  -3  -1 365.439 19.0576   2
   9  -3   1 363.469 16.3152   1
  -9  -3  -1 376.242 17.4459   1
   9   3   1 339.094 16.3497   1
   9   3   1 363.473 16.6716   4
 -10  -3  -1 1.36849 5.50921   2
  10  -3   1 -0.0751 4.23895   1
 -10  -3  -1 -1.5131 4.21725   1
  10   3   1 0.19787 4.31271   1
  10   3   1 -2.5805 3.86402   4
 -11  -3  -1 1.47901 5.65830   1
 -11  -3  -1 -0.3011 5.70228   2
  11  -3   1 4.82037 4.51251   1
  11   3   1 -3.7130 4.93184   4
  11   3   1 1.48055 5.05839   1
 -12  -3  -1 7.11776 5.64695   1
  12  -3   1 7.67361 5.96278   1
 -12  -3  -1 1.21100 6.12220   2
  12   3   1 13.3159 6.39673   4
  12   3   1 -4.6512 4.78571   1
  13  -3   1 4.29225 5.61718   1
 -13  -3  -1 3.21209 6.65854   2
 -13  -3  -1 13.9065 6.68457   1
 -13   3  -1 9.54520 5.60235   1
  13   3   1 1.28223 5.00665   1
  13   3   1 5.47293 6.58593   4
  14  -3   1 43.3664 10.2409   1
 -14  -3  -1 22.6385 8.56765   1
 -14  -3  -1 38.3086 11.0190   2
  14   3   1 27.5753 8.09239   1
 -14   3  -1 52.0743 9.33458   1
 -14  -4   1 -5.4341 6.85545   2
  14  -4  -1 7.09308 7.23953   1
 -14  -4   1 3.26251 6.41268   1
  14   4  -1 7.16449 6.70015   1
  14   4  -1 -7.6646 5.68587   4
  13  -4  -1 58.9302 11.5558   1
 -13  -4   1 42.3843 9.64993   1
 -13  -4   1 49.9110 11.6337   2
  13   4  -1 36.0978 8.45137   1
  13   4  -1 50.3731 10.6546   4
 -12  -4   1 -7.8965 4.67303   2
 -12  -4   1 0.10734 5.04803   1
  12  -4  -1 -3.2421 4.81027   1
  12   4  -1 6.88869 6.05229   1
  12   4  -1 -3.5697 4.83561   4
 -11  -4   1 56.0876 10.6527   2
 -11  -4   1 59.3686 10.9762   1
  11  -4  -1 48.0785 8.96596   1
  11   4  -1 64.9401 10.3065   1
  11   4  -1 59.7461 9.68405   4
 -10  -4   1 3.80115 5.94482   2
 -10  -4   1 7.38446 5.48976   1
  10  -4  -1 4.99282 4.49960   1
  10   4  -1 6.50267 5.07793   4
 -10   4   1 7.34233 5.32653   4
  10   4  -1 5.46753 4.45123   1
   9  -4  -1 0.22817 3.99099   1
   9   4  -1 -1.8931 3.55402   1
   9   4  -1 0.22235 4.54492   4
  -9   4   1 -3.0211 4.06719   4
   8  -4  -1 81.1587 8.94137   1
   8   4  -1 123.469 11.4434   1
   8   4  -1 117.341 11.1901   4
  -8   4   1 99.4396 10.3411   4
   7  -4  -1 647.308 20.2537   1
   7   4  -1 640.550 19.1280   1
   7   4  -1 563.176 19.4423   4
  -7   4   1 616.675 20.2115   4
   6  -4  -1 0.32141 2.74983   1
  -6  -4   1 -3.4006 2.96438   2
   6   4  -1 -0.6241 2.97083   4
   6   4  -1 -0.4479 2.58904   1
  -6   4   1 4.16817 3.78859   4
   5  -4  -1 302.834 12.0954   1
  -5  -4   1 272.308 12.3229   2
   5   4  -1 294.733 11.2566   1
  -5   4   1 298.991 12.3817   4
   5   4  -1 293.810 12.0678   4
   4  -4  -1 281.091 10.9790   1
  -4  -4   1 280.354 11.2895   2
  -4   4   1 271.839 11.1267   4
   4   4  -1 268.297 10.8546   4
   4   4  -1 280.878 10.1697   1
   3  -4  -1 578.883 15.2196   1
  -3  -4   1 578.999 15.1412   1
  -3  -4   1 573.123 14.8639   2
  -3   4   1 575.280 15.6392   4
   3   4  -1 582.283 15.0964   4
   3   4  -1 570.917 13.7145   1
   2  -4  -1 287.644 10.0361   1
  -2  -4   1 294.871 9.60159   1
   2  -4  -1 281.185 9.28079   2
  -2  -4   1 272.483 8.85901   2
   2   4  -1 300.542 8.56793   1
  -2   4   1 282.809 10.2767   4
   2   4  -1 286.135 9.65339   4
   1  -4  -1 176.962 7.88763   1
   1  -4  -1 190.100 7.46328   2
  -1  -4   1 192.143 7.31491   1
  -1  -4   1 201.028 6.45691   2
  -1   4   1 188.677 8.25010   4
   1   4  -1 194.621 7.46030   4
   0  -4  -1 18.8635 3.24195   2
   0  -4   1 19.6512 3.11136   1
   0  -4  -1 14.8243 3.44363   1
   0  -4   1 13.0624 2.11227   2
   0   4  -1 14.1322 2.89014   4
   0   4   1 17.5936 3.49796   4
  -1  -4  -1 858.903 17.9212   2
  -1  -4  -1 876.995 18.7537   1
   1  -4   1 857.208 16.1640   1
   1  -4   1 865.088 13.8950   2
  -1   4  -1 843.687 16.5885   4
   1   4   1 880.652 17.9750   1
   1   4   1 816.571 18.3122   4
   2  -4   1 494.411 11.7991   1
  -2  -4  -1 488.404 13.8511   1
  -2  -4  -1 480.413 13.4519   2
   2   4   1 505.988 13.3712   1
  -2   4  -1 487.539 12.2697   4
   2   4   1 475.367 13.8013   4
   3  -4   1 59.4280 5.24821   1
  -3  -4  -1 40.2921 5.29431   2
  -3  -4  -1 46.2414 5.29489   1
   3   4   1 45.5044 5.47725   4
  -3   4  -1 56.6116 5.19434   4
   3   4   1 49.4419 5.24606   1
  -3   4  -1 52.8295 3.65781   1
   4  -4   1 233.196 9.22552   1
  -4  -4  -1 239.699 10.9198   1
  -4  -4  -1 221.694 10.6274   2
   4   4   1 242.471 10.3123   1
  -4   4  -1 217.092 7.35260   1
  -4   4  -1 226.553 9.50963   4
   4   4   1 219.943 10.4930   4
   5  -4   1 60.8843 6.40271   1
  -5  -4  -1 50.3247 6.74284   1
  -5  -4  -1 79.7724 8.34546   2
   5   4   1 68.4973 7.16299   4
  -5   4  -1 63.4384 4.83073   1
   5   4   1 51.8186 5.93423   1
  -5   4  -1 63.1602 6.44626   4
  -6  -4  -1 3.80058 4.09581   1
   6  -4   1 7.24447 3.47720   1
  -6  -4  -1 5.80471 3.97970   2
   6   4   1 9.10530 3.65377   1
   6   4   1 8.32788 3.99589   4
  -6   4  -1 2.77270 3.49491   4
  -6   4  -1 0.56336 2.36343   1
   7  -4   1 162.992 10.4383   1
  -7  -4  -1 151.195 11.3374   2
  -7  -4  -1 136.789 10.5506   1
   7   4   1 141.314 10.0199   1
  -7   4  -1 153.225 10.2414   4
   7   4   1 151.270 10.5952   4
  -8  -4  -1 137.597 13.5879   2
   8  -4   1 155.858 10.8823   1
  -8  -4  -1 166.350 12.0853   1
   8   4   1 137.787 11.7735   4
   8   4   1 175.543 11.7080   1
  -8   4  -1 147.260 10.8610   4
  -9  -4  -1 325.197 18.3869   2
  -9  -4  -1 327.790 16.8106   1
   9  -4   1 305.075 15.2945   1
   9   4   1 313.126 16.3905   4
  -9   4  -1 297.177 15.6441   4
   9   4   1 318.671 15.9055   1
 -10  -4  -1 21.4926 6.74066   1
  10  -4   1 15.7583 5.86706   1
 -10  -4  -1 17.6982 7.72879   2
  10   4   1 16.7029 6.20591   1
  10   4   1 8.00085 5.35081   4
 -11  -4  -1 66.3205 11.4363   2
  11  -4   1 67.8859 10.0231   1
 -11  -4  -1 70.2209 10.7009   1
  11   4   1 59.8014 8.95782   1
  11   4   1 70.6868 11.0671   4
 -12  -4  -1 121.395 14.5179   1
 -12  -4  -1 119.470 15.1311   2
  12  -4   1 163.125 14.9854   1
  12   4   1 141.438 14.7445   4
  12   4   1 132.023 13.8287   1
 -13  -4  -1 27.0533 8.74207   1
 -13  -4  -1 43.3864 10.4591   2
  13  -4   1 51.1703 10.2438   1
  13   4   1 59.1451 11.2351   1
 -13   4  -1 45.3192 8.21622   1
  13   4   1 35.5801 9.29577   4
 -14  -4  -1 20.9908 9.15303   2
 -14  -4  -1 23.9075 8.90200   1
  14  -4   1 16.0204 9.32720   1
  14   4   1 39.4548 9.42132   1
 -14   4  -1 21.4590 6.90128   1
  13  -5  -1 133.117 15.3028   1
 -13  -5   1 73.5516 11.6995   1
 -13  -5   1 159.769 18.3596   2
  13   5  -1 119.268 14.8680   4
  13   5  -1 123.380 14.3256   1
 -12  -5   1 21.3991 7.73028   1
  12  -5  -1 32.5778 8.48068   1
 -12  -5   1 32.2898 9.25602   2
  12   5  -1 26.8306 7.85258   1
  12   5  -1 31.4743 8.47953   4
 -11  -5   1 80.8162 12.6998   2
  11  -5  -1 95.7269 12.6619   1
 -11  -5   1 100.535 13.6456   1
 -11   5   1 109.205 13.4853   4
  11   5  -1 102.739 12.4882   4
  11   5  -1 93.2237 11.5112   1
 -10  -5   1 248.482 17.4405   2
  10  -5  -1 219.555 14.8963   1
 -10  -5   1 241.749 15.9352   1
  10   5  -1 234.197 15.3014   4
 -10   5   1 278.227 16.6674   4
  10   5  -1 230.948 14.2746   1
   9  -5  -1 6.21826 4.68012   1
  -9  -5   1 0.79508 5.11300   2
  -9  -5   1 5.01715 5.97487   1
  -9   5   1 10.8772 5.67669   4
   9   5  -1 3.38404 4.36106   4
   9   5  -1 4.62931 4.35014   1
   8  -5  -1 36.1940 7.56528   1
  -8  -5   1 21.0408 6.48690   2
  -8  -5   1 34.1556 7.65727   1
   8   5  -1 25.3300 6.86887   4
  -8   5   1 41.8988 7.84182   4
   8   5  -1 31.1676 6.49894   1
  -7  -5   1 0.68648 3.58766   1
  -7  -5   1 1.84662 4.60996   2
   7  -5  -1 -2.8583 3.53930   1
  -7   5   1 4.07481 4.20785   4
   7   5  -1 1.34152 3.33544   1
   7   5  -1 -2.3823 3.74350   4
   6  -5  -1 248.649 12.5477   1
  -6  -5   1 248.032 13.0525   2
  -6  -5   1 255.966 13.1124   1
  -6   5   1 249.712 12.6651   4
   6   5  -1 244.678 11.5457   1
   6   5  -1 244.370 12.6418   4
  -5  -5   1 21.2465 4.85312   1
   5  -5  -1 14.1537 4.31624   1
  -5  -5   1 28.0050 5.35854   2
   5   5  -1 19.2704 4.27934   1
  -5   5   1 16.5723 4.64700   4
   5   5  -1 13.9195 4.22623   4
  -4  -5   1 71.8642 7.21477   2
  -4  -5   1 54.3242 6.42256   1
   4  -5  -1 56.8423 6.85635   1
   4   5  -1 75.0309 6.02044   1
   4   5  -1 69.9585 7.23363   4
  -4   5   1 74.5690 7.58337   4
  -3  -5   1 587.480 16.2498   1
   3  -5  -1 572.902 16.2866   1
  -3  -5   1 574.726 15.3983   2
   3   5  -1 584.816 16.1792   4
   3   5  -1 572.199 14.2960   1
  -3   5   1 581.624 16.7543   4
  -2  -5   1 628.213 14.8006   2
  -2  -5   1 629.895 16.1869   1
   2  -5  -1 648.591 16.7214   1
   2  -5  -1 618.913 15.3044   2
  -2   5   1 629.375 16.9751   4
   2   5  -1 634.180 16.2233   4
   2   5  -1 618.010 13.9855   1
   1  -5  -1 1240.48 24.7468   1
  -1  -5   1 1222.41 20.9272   2
  -1  -5   1 1251.62 23.4188   1
   1  -5  -1 1215.17 22.9806   2
   1   5  -1 1203.15 23.5458   4
  -1   5   1 1182.34 24.8375   4
   0  -5   1 32.1949 4.42492   1
   0  -5  -1 21.2614 3.70167   2
   0  -5   1 30.2063 3.14220   2
   0  -5  -1 24.7811 4.10496   1
   0   5   1 29.4936 4.64291   4
   0   5  -1 31.8824 4.24276   4
   1  -5   1 197.528 6.19330   2
   1  -5   1 196.380 7.95825   1
  -1  -5  -1 206.033 9.38458   1
  -1  -5  -1 192.187 8.43781   2
   1   5   1 218.525 8.97643   1
  -1   5  -1 193.995 8.23908   4
   1   5   1 192.726 9.44088   4
   2  -5   1 832.945 18.0027   1
  -2  -5  -1 882.515 20.1211   2
  -2  -5  -1 878.930 20.9038   1
  -2   5  -1 842.007 14.3908   1
  -2   5  -1 848.277 18.9011   4
   2   5   1 859.039 20.6502   4
   2   5   1 825.905 19.2696   1
   3  -5   1 1010.91 20.8629   1
  -3  -5  -1 1020.99 23.1755   2
  -3  -5  -1 1010.61 23.5158   1
  -3   5  -1 1008.06 17.0117   1
   3   5   1 1000.87 23.4131   4
  -3   5  -1 1024.88 21.7099   4
   3   5   1 980.039 22.2268   1
  -4  -5  -1 143.722 9.30704   2
   4  -5   1 139.868 7.93279   1
  -4  -5  -1 123.540 8.94400   1
  -4   5  -1 148.444 8.36461   4
  -4   5  -1 150.461 6.12722   1
   4   5   1 153.043 8.97903   1
   4   5   1 143.119 9.35747   4
   5  -5   1 445.783 14.5795   1
  -5  -5  -1 449.890 16.4468   1
  -5  -5  -1 421.148 16.4434   2
   5   5   1 448.623 16.4576   4
   5   5   1 464.963 15.8285   1
  -5   5  -1 455.456 15.2008   4
  -5   5  -1 452.954 11.7174   1
  -6  -5  -1 65.5317 8.34469   2
  -6  -5  -1 59.1603 7.90870   1
   6  -5   1 62.5306 7.55307   1
  -6   5  -1 75.3108 7.93674   4
  -6   5  -1 68.0528 5.87115   1
   6   5   1 43.9166 7.03384   4
   6   5   1 67.5425 7.78225   1
  -7  -5  -1 201.861 13.1020   1
  -7  -5  -1 196.198 13.3886   2
   7  -5   1 204.911 11.6405   1
  -7   5  -1 193.763 12.1213   4
   7   5   1 217.567 12.4443   1
  -7   5  -1 204.941 9.35836   1
   7   5   1 213.295 12.7736   4
   8  -5   1 29.0207 6.58380   1
  -8  -5  -1 33.4579 7.78739   2
  -8  -5  -1 27.3347 6.85274   1
   8   5   1 29.5251 6.33680   1
   8   5   1 34.2940 7.38279   4
  -8   5  -1 35.9690 7.08255   4
  -9  -5  -1 1.28400 4.90695   1
  -9  -5  -1 2.13661 5.13640   2
   9  -5   1 -0.6599 3.98570   1
   9   5   1 1.89843 4.39431   1
  -9   5  -1 -0.3979 4.00181   4
   9   5   1 11.1648 5.55873   4
 -10  -5  -1 104.662 12.5207   1
 -10  -5  -1 94.5434 13.2853   2
  10  -5   1 103.157 12.0451   1
 -10   5  -1 83.4935 10.7981   4
  10   5   1 83.3632 11.2240   4
  10   5   1 104.246 12.3984   1
  11  -5   1 63.7399 9.86380   1
 -11  -5  -1 64.0538 10.9950   1
 -11  -5  -1 54.6654 11.0041   2
  11   5   1 56.0947 9.93114   4
  11   5   1 61.5708 9.65525   1
 -11   5  -1 57.8019 10.1766   4
 -12  -5  -1 16.9360 8.14214   2
 -12  -5  -1 23.1678 7.86360   1
  12   5   1 16.8928 7.52578   4
  12   5   1 32.3687 7.97484   1
 -13  -5  -1 13.4942 8.12514   2
 -13  -5  -1 16.4330 7.80277   1
  13   5   1 -2.5648 5.50518   4
  13   5   1 8.44623 6.30989   1
 -13   5  -1 12.4405 5.64798   1
 -13  -6   1 24.3360 9.85274   2
 -13  -6   1 40.2413 10.3562   1
  13  -6  -1 20.9965 8.71210   1
  13   6  -1 32.4740 8.52583   1
  13   6  -1 34.6550 10.0127   4
  12  -6  -1 43.3211 9.47839   1
 -12  -6   1 37.7689 10.7783   2
 -12  -6   1 31.3525 8.32938   1
  12   6  -1 51.6828 10.1063   1
 -12   6   1 43.8837 10.0990   4
  12   6  -1 42.1033 10.0670   4
 -11  -6   1 36.0520 9.42748   2
  11  -6  -1 45.5169 8.87076   1
 -11  -6   1 30.4789 8.54725   1
  11   6  -1 26.4175 7.04358   1
 -11   6   1 24.4313 7.61585   4
  11   6  -1 32.5997 8.84521   4
 -10  -6   1 -2.3542 4.87658   1
  10  -6  -1 1.22807 5.25038   1
 -10  -6   1 -1.4848 5.35247   2
  10   6  -1 -2.5663 4.01636   1
  10   6  -1 -2.9943 4.68091   4
 -10   6   1 0.83698 5.20776   4
   9  -6  -1 196.191 14.0097   1
  -9  -6   1 144.663 13.3567   1
  -9  -6   1 167.194 15.9988   2
  -9   6   1 163.733 14.9557   4
   9   6  -1 189.173 12.6245   1
   9   6  -1 171.304 14.9123   4
  -8  -6   1 191.747 13.6965   2
  -8  -6   1 183.256 13.3847   1
   8  -6  -1 209.482 13.4976   1
   8   6  -1 198.500 12.3198   1
   8   6  -1 170.334 12.7514   4
  -8   6   1 201.716 13.8630   4
  -7  -6   1 399.492 18.2893   2
  -7  -6   1 416.018 18.2513   1
   7  -6  -1 436.814 17.8030   1
   7   6  -1 398.564 15.9563   1
   7   6  -1 412.248 18.1463   4
  -7   6   1 392.134 17.5662   4
  -6  -6   1 30.6503 6.69750   1
  -6  -6   1 37.0516 6.65401   2
   6  -6  -1 29.2470 6.05105   1
   6   6  -1 29.5142 6.25898   4
   6   6  -1 29.1519 5.54228   1
  -6   6   1 38.7695 7.04322   4
   5  -6  -1 181.298 10.9713   1
  -5  -6   1 188.925 11.3576   1
  -5  -6   1 199.399 11.3125   2
   5   6  -1 186.426 9.84154   1
  -5   6   1 182.991 11.3758   4
   5   6  -1 184.648 11.1024   4
  -4  -6   1 39.4544 6.35969   1
   4  -6  -1 36.6516 6.22014   1
  -4  -6   1 31.4545 5.42586   2
  -4   6   1 41.5930 6.34054   4
   4   6  -1 30.2510 5.70673   4
   4   6  -1 57.4787 6.13339   1
  -3  -6   1 6.73070 3.80324   1
   3  -6  -1 4.81504 3.42018   1
  -3  -6   1 9.80086 3.38949   2
   3   6  -1 1.94263 3.36366   4
  -3   6   1 11.1532 4.21377   4
   3   6  -1 6.12442 2.86488   1
   2  -6  -1 20.3163 4.47245   1
  -2  -6   1 18.0274 4.04837   1
  -2  -6   1 18.2422 3.72962   2
   2  -6  -1 18.4252 3.69257   2
   2   6  -1 9.88741 3.74620   4
  -2   6   1 17.7519 4.44854   4
  -1  -6   1 330.103 9.83788   2
  -1  -6   1 327.877 11.8439   1
   1  -6  -1 320.745 11.1137   2
   1  -6  -1 350.550 12.9638   1
  -1   6   1 330.766 13.1025   4
   1   6  -1 345.692 12.4085   4
   0  -6  -1 -1.2097 2.49536   1
   0  -6   1 3.68231 2.76731   1
   0  -6   1 -0.4582 1.60118   2
   0  -6  -1 1.14250 2.29257   2
   0   6   1 -1.2750 2.76932   4
   0   6  -1 0.62035 2.66963   4
   1  -6   1 29.1530 3.37171   2
   1  -6   1 27.8175 4.78795   1
  -1  -6  -1 15.9850 3.92981   2
  -1  -6  -1 24.8201 5.16910   1
  -1   6  -1 31.9235 4.97914   4
   1   6   1 14.3105 4.14904   4
   1   6   1 18.6083 3.92392   1
  -2  -6  -1 795.833 20.9894   1
  -2  -6  -1 783.805 19.7346   2
   2  -6   1 759.505 18.4113   1
  -2   6  -1 744.014 19.0296   4
   2   6   1 775.817 19.4826   1
   2   6   1 728.150 20.4160   4
  -3  -6  -1 586.735 17.6334   2
   3  -6   1 588.641 16.2438   1
  -3  -6  -1 585.282 18.4816   1
   3   6   1 592.196 17.1832   1
   3   6   1 586.651 18.4872   4
  -3   6  -1 597.962 17.0720   4
   4  -6   1 44.3165 5.88828   1
  -4  -6  -1 42.2114 6.30012   2
  -4  -6  -1 42.2253 6.84023   1
   4   6   1 47.1222 6.29800   1
  -4   6  -1 45.3727 4.17628   1
   4   6   1 35.9677 6.21836   4
  -4   6  -1 42.4391 6.13482   4
  -5  -6  -1 68.5471 8.52077   2
  -5  -6  -1 82.9096 10.0562   1
   5  -6   1 66.1558 7.80722   1
   5   6   1 62.2175 7.73482   1
  -5   6  -1 55.0163 7.46290   4
  -5   6  -1 62.0768 5.19592   1
   5   6   1 58.2883 7.95944   4
  -6  -6  -1 70.6048 8.95981   1
   6  -6   1 88.8221 8.89687   1
  -6  -6  -1 92.8485 10.4779   2
   6   6   1 81.2945 9.00052   1
  -6   6  -1 72.8388 8.48838   4
   6   6   1 89.9026 9.91907   4
  -6   6  -1 84.5370 5.71295   1
  -7  -6  -1 531.307 21.3835   2
   7  -6   1 541.732 19.3892   1
  -7  -6  -1 580.155 21.6425   1
  -7   6  -1 525.249 14.3791   1
   7   6   1 529.275 20.7722   4
   7   6   1 555.204 19.8680   1
  -7   6  -1 570.642 20.0982   4
  -8  -6  -1 94.6274 11.8523   1
  -8  -6  -1 73.5851 10.4453   2
   8  -6   1 85.0940 10.0955   1
   8   6   1 107.987 12.0525   4
  -8   6  -1 86.6978 10.3561   4
   8   6   1 76.0618 9.27007   1
  -9  -6  -1 -0.4576 5.00600   2
  -9  -6  -1 4.61449 5.38807   1
   9  -6   1 6.38552 4.81101   1
  -9   6  -1 4.28369 4.87964   4
   9   6   1 5.02475 5.77015   4
   9   6   1 8.62815 5.14593   1
 -10  -6  -1 54.1755 10.8477   2
 -10  -6  -1 53.7451 9.57551   1
  10   6   1 57.0836 9.83114   4
  10   6   1 38.7763 7.89176   1
 -10   6  -1 46.8654 9.01651   4
 -11  -6  -1 91.4947 13.5760   2
 -11  -6  -1 79.0996 12.4028   1
 -11   6  -1 78.6381 11.1418   4
  11   6   1 83.1849 11.5305   1
  11   6   1 82.9569 12.7990   4
 -12  -6  -1 31.4074 8.80177   1
 -12  -6  -1 26.8628 9.45067   2
  12   6   1 37.8118 9.70011   4
  12   6   1 30.0753 8.16101   1
 -12   6  -1 40.3764 6.71019   1
 -13  -6  -1 4.45355 7.55154   2
 -13  -6  -1 2.48968 7.35454   1
 -13   6  -1 3.05725 4.52365   1
  13   6   1 14.4329 8.54492   4
  13   6   1 1.06049 5.61949   1
 -12  -7   1 47.2778 10.9107   1
 -12  -7   1 42.0839 11.1517   2
 -12   7   1 59.1814 11.4364   4
  12   7  -1 60.7674 10.6410   1
  12   7  -1 79.8265 12.8821   4
  11  -7  -1 100.008 12.8277   1
 -11  -7   1 61.9491 11.1666   1
 -11  -7   1 83.8369 13.1384   2
  11   7  -1 72.4629 11.8223   4
  11   7  -1 72.8555 10.4398   1
 -11   7   1 107.155 13.9589   4
 -10  -7   1 44.3482 9.68410   2
 -10  -7   1 49.7034 9.36544   1
  10  -7  -1 45.4351 8.81920   1
  10   7  -1 36.8473 7.88468   1
 -10   7   1 44.5386 9.44968   4
  10   7  -1 54.4625 10.4231   4
  -9  -7   1 224.757 15.6913   1
   9  -7  -1 211.690 14.9864   1
  -9  -7   1 208.888 15.5576   2
   9   7  -1 205.275 15.3586   4
   9   7  -1 206.504 13.3389   1
  -9   7   1 213.764 15.6247   4
  -8  -7   1 6.07489 5.31086   1
   8  -7  -1 0.60019 4.33738   1
  -8  -7   1 9.67563 5.16971   2
   8   7  -1 -0.2147 4.77544   4
  -8   7   1 -4.7495 4.36886   4
   8   7  -1 -0.5571 3.62090   1
  -7  -7   1 415.150 18.7340   2
   7  -7  -1 454.665 19.1978   1
  -7  -7   1 461.500 19.8983   1
   7   7  -1 455.547 19.7677   4
  -7   7   1 411.355 18.8266   4
   7   7  -1 458.205 17.1133   1
  -6  -7   1 66.2679 8.81149   2
   6  -7  -1 44.6836 7.61791   1
  -6  -7   1 67.8507 9.86331   1
  -6   7   1 63.2922 8.69924   4
   6   7  -1 50.5135 8.26887   4
   6   7  -1 61.9069 7.63734   1
  -5  -7   1 34.1448 6.22246   2
  -5  -7   1 27.4860 6.44146   1
   5  -7  -1 39.2118 6.89173   1
  -5   7   1 42.2140 7.43052   4
   5   7  -1 27.9085 5.24514   1
   5   7  -1 40.8913 7.06440   4
  -4  -7   1 21.6009 5.40592   1
  -4  -7   1 14.9465 4.35602   2
   4  -7  -1 19.0149 5.38489   1
   4   7  -1 24.1648 4.82481   1
  -4   7   1 15.9617 5.32871   4
   4   7  -1 21.3764 5.45789   4
   3  -7  -1 46.7251 7.10947   1
  -3  -7   1 36.9971 5.97435   1
  -3  -7   1 54.3982 6.21777   2
   3   7  -1 39.1202 5.43711   1
   3   7  -1 32.6656 6.10809   4
  -3   7   1 39.4410 6.65744   4
  -2  -7   1 256.503 10.2038   2
  -2  -7   1 267.555 12.1652   1
   2  -7  -1 283.634 11.2051   2
   2  -7  -1 287.156 12.8726   1
  -2   7   1 260.086 13.0063   4
   2   7  -1 253.264 12.2019   4
  -1  -7   1 61.8782 5.56426   2
   1  -7  -1 69.3443 6.80626   2
  -1  -7   1 61.5022 7.45006   1
   1  -7  -1 50.4553 7.01126   1
   1   7  -1 58.0881 7.21239   4
  -1   7   1 45.1179 6.82146   4
   0  -7  -1 3.09447 2.73973   2
   0  -7  -1 0.62914 3.12763   1
   0  -7   1 1.35611 2.97228   1
   0  -7   1 2.31422 2.05163   2
   0   7   1 -0.2538 3.33857   4
   0   7  -1 -1.1808 3.09386   4
   1  -7   1 528.923 16.2064   1
  -1  -7  -1 529.813 17.7147   1
  -1  -7  -1 537.224 16.0636   2
   1  -7   1 521.251 12.4934   2
   1   7   1 531.669 17.9277   4
  -1   7  -1 529.698 16.7886   4
  -2  -7  -1 42.5149 6.12348   2
  -2  -7  -1 46.7258 7.00731   1
   2  -7   1 41.2041 6.10335   1
   2   7   1 36.9744 6.38227   4
  -2   7  -1 38.9312 6.01345   4
   2   7   1 39.8341 5.81247   1
  -3  -7  -1 480.239 16.5168   2
  -3  -7  -1 464.992 17.7097   1
   3  -7   1 469.797 15.7956   1
  -3   7  -1 456.623 16.2109   4
   3   7   1 501.975 16.5416   1
   3   7   1 508.391 18.1299   4
   4  -7   1 9.98094 4.09412   1
  -4  -7  -1 3.27001 4.04666   1
  -4  -7  -1 12.4603 4.44632   2
  -4   7  -1 9.71518 4.40774   4
   4   7   1 9.18189 4.48516   1
   4   7   1 9.77403 4.91114   4
   5  -7   1 166.968 10.5269   1
  -5  -7  -1 170.179 12.1155   1
  -5  -7  -1 163.524 11.5205   2
   5   7   1 177.157 12.4203   4
   5   7   1 159.800 10.6753   1
  -5   7  -1 186.833 11.5068   4
  -6  -7  -1 98.4111 11.1361   2
  -6  -7  -1 87.2895 10.4740   1
   6  -7   1 97.9516 9.95621   1
  -6   7  -1 112.280 10.7992   4
   6   7   1 97.6648 11.2392   4
   6   7   1 92.4160 9.77130   1
  -7  -7  -1 647.698 24.1990   2
   7  -7   1 634.012 22.4374   1
  -7   7  -1 611.393 21.9240   4
   7   7   1 643.131 23.6008   4
   7   7   1 619.179 21.6911   1
  -8  -7  -1 621.943 24.8528   2
   8   7   1 569.131 21.6798   1
   8   7   1 626.724 24.5796   4
  -8   7  -1 603.815 23.0325   4
  -9  -7  -1 68.7566 11.2113   2
  -9  -7  -1 62.0384 10.0143   1
   9   7   1 68.8004 9.75644   1
  -9   7  -1 69.3621 10.0834   4
   9   7   1 78.2982 11.1697   4
 -10  -7  -1 156.861 16.8508   1
 -10  -7  -1 153.371 16.9258   2
  10   7   1 130.387 14.5109   4
  10   7   1 132.311 13.3718   1
 -10   7  -1 152.437 14.7460   4
 -11  -7  -1 12.3514 6.96651   1
 -11  -7  -1 18.9059 8.27434   2
  11   7   1 10.4255 7.13041   4
  11   7   1 10.9865 6.61602   1
 -11   7  -1 25.5043 7.75688   4
 -12  -7  -1 80.2155 12.6621   1
 -12  -7  -1 89.6146 14.4034   2
  12   7   1 82.7606 13.2152   1
 -12   7  -1 44.9031 9.71714   4
 -12   7  -1 68.6886 7.59700   1
  12   7   1 72.7383 12.8769   4
 -11  -8   1 18.1582 8.17518   1
 -11  -8   1 21.6981 8.47788   2
  11   8  -1 13.5922 8.02852   4
  11   8  -1 12.0662 6.19914   1
 -11   8   1 16.6194 7.56456   4
 -10  -8   1 10.8587 6.66869   2
 -10  -8   1 6.31703 6.50327   1
  10   8  -1 4.51050 4.69368   1
  10   8  -1 7.60902 6.19723   4
 -10   8   1 12.2405 6.43158   4
  -9  -8   1 49.1426 9.59807   1
   9  -8  -1 65.2808 11.4910   1
  -9  -8   1 51.2376 9.97932   2
   9   8  -1 46.0967 9.62482   4
  -9   8   1 32.9961 8.59365   4
   9   8  -1 39.8340 7.39216   1
   8  -8  -1 142.458 14.1058   1
  -8  -8   1 136.715 15.5198   1
  -8  -8   1 118.558 13.1607   2
  -8   8   1 137.455 14.0159   4
   8   8  -1 131.377 11.8514   1
   8   8  -1 137.961 14.1034   4
  -7  -8   1 148.305 13.5434   1
  -7  -8   1 168.757 12.9309   2
   7  -8  -1 165.464 14.3187   1
  -7   8   1 168.052 15.1217   4
   7   8  -1 142.351 13.9457   4
   7   8  -1 170.705 11.0899   1
  -6  -8   1 114.464 11.5814   2
  -6  -8   1 107.196 12.6227   1
   6  -8  -1 100.201 11.2039   1
   6   8  -1 96.8441 9.28799   1
   6   8  -1 95.5319 10.9453   4
  -6   8   1 73.5952 9.88168   4
  -5  -8   1 174.228 12.6167   1
  -5  -8   1 180.780 11.2255   2
   5  -8  -1 176.377 12.4960   1
   5   8  -1 197.575 10.6950   1
   5   8  -1 181.435 12.7212   4
  -5   8   1 178.689 12.7920   4
   4  -8  -1 256.613 14.1626   1
  -4  -8   1 269.224 12.6536   2
  -4  -8   1 275.758 14.5865   1
   4   8  -1 280.117 14.6640   4
  -4   8   1 254.377 14.4833   4
   4   8  -1 283.853 11.8027   1
  -3  -8   1 212.629 12.5680   1
   3  -8  -1 240.944 13.2546   1
  -3  -8   1 225.849 10.9175   2
  -3   8   1 222.049 13.2607   4
   3   8  -1 222.513 12.9819   4
  -2  -8   1 37.6905 5.44961   2
   2  -8  -1 33.4417 6.86613   1
  -2  -8   1 41.1514 7.45835   1
   2  -8  -1 31.0086 5.25088   2
  -2   8   1 25.5750 6.22636   4
   2   8  -1 27.2158 6.01942   4
   1  -8  -1 54.8330 6.55316   2
  -1  -8   1 65.7141 6.12907   2
  -1  -8   1 64.5774 8.48780   1
   1  -8  -1 63.2500 8.89437   1
  -1   8   1 46.2098 7.48356   4
   1   8  -1 52.0685 7.43297   4
   0  -8  -1 8.34737 3.51580   2
   0  -8   1 6.81965 2.79154   2
   0  -8   1 10.6903 4.56473   1
   0  -8  -1 7.31254 4.23941   1
   0   8   1 9.60942 5.03497   4
   0   8  -1 7.36694 4.58033   4
  -1  -8  -1 521.964 19.0092   1
   1  -8   1 533.495 17.8511   1
  -1  -8  -1 514.202 16.4342   2
   1  -8   1 522.771 13.1233   2
   1   8   1 488.181 18.8530   4
  -1   8  -1 519.189 18.0361   4
  -2  -8  -1 79.6827 9.70319   1
   2  -8   1 71.3903 8.18044   1
  -2  -8  -1 83.8343 8.57515   2
  -2   8  -1 59.1407 7.81259   4
   2   8   1 75.0833 9.27957   4
   3  -8   1 133.680 9.80120   1
  -3  -8  -1 129.950 9.64170   2
  -3  -8  -1 154.648 11.4595   1
   3   8   1 134.848 12.0615   4
   3   8   1 136.644 9.72402   1
  -3   8  -1 134.004 10.3600   4
  -4  -8  -1 15.4217 5.81237   1
   4  -8   1 13.5982 5.02265   1
  -4  -8  -1 12.7429 4.95626   2
   4   8   1 7.34704 4.37059   1
   4   8   1 14.4441 5.57431   4
  -4   8  -1 2.80667 4.20751   4
  -5  -8  -1 21.6707 6.95184   1
  -5  -8  -1 39.8180 7.37608   2
   5   8   1 29.3014 7.16215   4
   5   8   1 53.1337 7.55237   1
  -5   8  -1 37.5733 7.03161   4
  -6  -8  -1 22.7877 6.74998   2
  -6  -8  -1 14.0297 5.51773   1
   6   8   1 24.4264 6.81129   4
  -6   8  -1 15.1681 5.48637   4
   6   8   1 27.5737 6.29364   1
  -7  -8  -1 21.8821 6.86792   2
  -7  -8  -1 23.5598 7.01605   1
   7   8   1 31.4941 7.88419   4
  -7   8  -1 25.2215 6.93866   4
   7   8   1 18.7278 5.82961   1
  -8  -8  -1 55.2530 10.9780   1
  -8  -8  -1 52.9955 9.86286   2
   8   8   1 48.3388 9.68787   4
  -8   8  -1 58.6742 9.28530   4
   8   8   1 51.0458 8.43776   1
  -9  -8  -1 188.447 17.9423   2
   9   8   1 214.184 16.3820   4
   9   8   1 242.018 15.1354   1
  -9   8  -1 200.763 15.3411   4
 -10  -8  -1 0.06698 5.63440   1
 -10  -8  -1 3.92708 6.08301   2
  10   8   1 8.42893 5.57095   1
 -10   8  -1 3.46347 5.60414   4
  10   8   1 1.76631 5.89812   4
 -11  -8  -1 182.460 19.6505   1
 -11  -8  -1 181.241 18.7873   2
 -11   8  -1 195.343 18.3608   4
  11   8   1 161.806 15.6167   1
  11   8   1 236.709 21.0345   4
 -10  -9   1 50.7809 10.7304   1
 -10  -9   1 60.4103 11.5197   2
  10   9  -1 59.1325 9.24915   1
  10   9  -1 57.3190 11.2175   4
 -10   9   1 36.9322 9.56528   4
  -9  -9   1 19.7699 7.64968   1
  -9  -9   1 17.0932 7.47447   2
   9   9  -1 32.4479 7.06865   1
  -9   9   1 20.1300 7.54280   4
   9   9  -1 29.0421 8.66733   4
  -8  -9   1 330.917 19.6814   1
  -8  -9   1 311.409 18.2257   2
   8   9  -1 307.358 19.0362   4
   8   9  -1 330.961 15.7388   1
  -8   9   1 305.876 18.6134   4
  -7  -9   1 24.8225 6.86642   2
  -7  -9   1 26.5607 7.07267   1
  -7   9   1 34.0506 8.02476   4
   7   9  -1 48.0596 7.49244   1
   7   9  -1 16.9122 6.79400   4
  -6  -9   1 4.42222 4.67474   1
  -6  -9   1 12.7720 5.49087   2
   6  -9  -1 7.69169 5.46529   1
   6   9  -1 1.44566 5.10846   4
  -6   9   1 8.93233 5.42227   4
   6   9  -1 20.7238 5.31319   1
  -5  -9   1 3.91527 4.35090   1
  -5  -9   1 16.6178 5.13648   2
   5  -9  -1 5.02062 4.62044   1
  -5   9   1 4.39901 5.08600   4
   5   9  -1 11.1735 5.67801   4
   5   9  -1 9.40392 4.33212   1
   4  -9  -1 27.7154 6.69311   1
  -4  -9   1 20.4791 6.42913   1
  -4  -9   1 22.5738 5.47477   2
  -4   9   1 18.5382 6.15583   4
   4   9  -1 16.5051 6.04093   4
   3  -9  -1 34.7416 6.82198   1
  -3  -9   1 41.1500 6.42656   2
  -3  -9   1 30.3889 6.98648   1
  -3   9   1 28.5813 7.00845   4
   3   9  -1 25.5920 6.72791   4
  -2  -9   1 264.142 11.2512   2
  -2  -9   1 265.296 14.2889   1
   2  -9  -1 253.417 11.7457   2
   2  -9  -1 257.278 14.5474   1
  -2   9   1 258.092 14.9335   4
   2   9  -1 234.667 13.9531   4
  -1  -9   1 61.6786 6.29689   2
   1  -9  -1 78.1029 7.86392   2
  -1  -9   1 70.9960 8.57153   1
   1  -9  -1 68.0501 9.57402   1
  -1   9   1 54.9522 8.41315   4
   1   9  -1 59.1834 8.43540   4
   0  -9   1 9.76926 5.08479   1
   0  -9   1 12.9547 3.58784   2
   0  -9  -1 9.21343 5.25382   1
   0  -9  -1 9.40914 3.94980   2
   0   9  -1 8.69587 4.79423   4
   0   9   1 8.57270 4.99955   4
  -1  -9  -1 79.7683 10.4803   1
  -1  -9  -1 87.6037 8.70557   2
   1  -9   1 70.8491 6.10471   2
  -1   9  -1 58.0389 8.22743   4
   1   9   1 90.7481 10.3358   4
  -2  -9  -1 1766.15 36.4052   2
  -2   9  -1 1738.67 38.7184   4
   2   9   1 1744.29 40.4895   4
  -3  -9  -1 67.5814 8.47033   2
  -3  -9  -1 63.8234 9.19281   1
  -3   9  -1 67.2427 9.02028   4
   3   9   1 60.6613 9.40632   4
  -4  -9  -1 57.4519 8.77173   1
  -4  -9  -1 71.6489 9.13908   2
   4   9   1 62.5937 8.30499   1
   4   9   1 73.4273 10.5267   4
  -4   9  -1 66.8276 9.07897   4
  -5  -9  -1 0.02940 4.07847   1
  -5  -9  -1 12.8757 5.53512   2
   5   9   1 12.2373 5.73567   4
  -5   9  -1 -1.7506 4.12113   4
   5   9   1 8.73402 4.55617   1
  -6  -9  -1 73.3006 10.3883   2
  -6  -9  -1 71.7688 11.4431   1
   6   9   1 82.3728 9.78718   1
   6   9   1 76.4328 11.0912   4
  -6   9  -1 86.6004 10.8925   4
  -7  -9  -1 24.5042 7.37926   1
  -7  -9  -1 24.4432 7.50494   2
  -7   9  -1 41.0989 8.26703   4
   7   9   1 38.0449 9.16281   4
   7   9   1 28.7794 6.69539   1
  -8  -9  -1 93.1866 12.5344   2
  -8  -9  -1 101.407 13.8661   1
  -8   9  -1 104.743 12.6411   4
   8   9   1 91.8432 12.7589   4
   8   9   1 117.948 12.5055   1
  -9  -9  -1 -3.1459 4.73197   2
  -9  -9  -1 0.05459 4.91783   1
  -9   9  -1 0.57727 5.58673   4
   9   9   1 -3.6878 4.04843   1
   9   9   1 6.73955 6.83281   4
 -10  -9  -1 7.87052 6.56949   2
 -10  -9  -1 3.08589 6.00698   1
  10   9   1 -2.3116 4.23876   1
 -10   9  -1 13.2684 7.02624   4
  10   9   1 0.02897 6.66444   4
  -9 -10   1 25.7133 8.00710   2
   9  10  -1 22.3021 6.37842   1
   9  10  -1 22.9422 8.44050   4
  -9  10   1 25.8885 8.67120   4
  -8 -10   1 35.3339 8.47654   2
   8  10  -1 35.0532 9.32273   4
   8  10  -1 45.6788 7.52684   1
  -8  10   1 43.2279 9.72195   4
  -7 -10   1 2.42665 5.12966   2
   7  10  -1 5.94033 4.12782   1
  -7  10   1 -1.9576 4.64779   4
   7  10  -1 1.16437 5.41359   4
  -6 -10   1 103.726 11.5840   2
  -6  10   1 81.2434 11.5618   4
   6  10  -1 73.7993 11.4371   4
  -5 -10   1 4.52104 4.46546   2
  -5  10   1 15.3075 6.70080   4
   5  10  -1 5.38732 5.37763   4
  -4 -10   1 15.4840 5.04253   2
  -4  10   1 26.9932 7.29731   4
   4  10  -1 29.2503 7.76034   4
  -3 -10   1 186.831 11.0318   2
   3 -10  -1 189.711 18.6060   1
  -3  10   1 219.137 14.8645   4
   3  10  -1 191.827 13.9563   4
   2 -10  -1 91.7577 10.7223   1
   2 -10  -1 90.4866 8.77653   2
   2  10  -1 103.907 11.5764   4
  -2  10   1 81.0206 10.6876   4
   1 -10  -1 71.8416 7.95466   2
   1 -10  -1 90.3066 11.2416   1
  -1  10   1 80.2113 10.5013   4
   1  10  -1 82.2389 10.4799   4
   0 -10  -1 60.5842 8.95213   1
   0 -10  -1 67.2382 7.88330   2
   0  10   1 75.1187 10.4268   4
   0  10  -1 61.0544 9.22517   4
  -1 -10  -1 6.22430 3.99465   2
  -1 -10  -1 15.1217 5.64947   1
   1  10   1 5.06964 5.29864   4
  -1  10  -1 1.44368 4.42013   4
  -2 -10  -1 44.3175 7.23999   2
  -2 -10  -1 27.2379 7.49441   1
  -2  10  -1 37.4008 7.68398   4
   2  10   1 33.4359 7.63613   4
  -3 -10  -1 4.37958 5.07944   1
  -3 -10  -1 -1.2810 3.51237   2
   3  10   1 -1.5942 4.55925   4
  -3  10  -1 -2.3496 3.81184   4
  -4 -10  -1 -1.6094 4.04227   1
  -4 -10  -1 0.55950 4.01216   2
   4  10   1 8.88312 5.71202   4
  -4  10  -1 0.70055 4.31054   4
  -5 -10  -1 128.865 12.9072   2
  -5 -10  -1 170.032 17.5056   1
   5  10   1 148.273 15.1071   4
  -5  10  -1 116.454 12.2209   4
   5  10   1 159.815 11.5954   1
  -6 -10  -1 -1.8452 4.15697   1
  -6 -10  -1 -1.4296 4.51094   2
   6  10   1 -3.0190 3.78455   1
  -6  10  -1 0.33041 4.40239   4
   6  10   1 -3.4746 4.66604   4
  -7 -10  -1 9.05062 5.41084   2
  -7 -10  -1 8.20858 6.36695   1
  -7  10  -1 -2.7592 4.78438   4
   7  10   1 1.52915 4.86354   1
   7  10   1 6.86113 6.56007   4
  -8 -10  -1 170.557 16.7957   2
  -8  10  -1 137.331 14.7270   4
   8  10   1 181.854 13.3934   1
   8  10   1 146.826 16.2645   4
  -9 -10  -1 35.1287 9.77070   1
  -9 -10  -1 49.2691 10.5892   2
   9  10   1 67.2886 12.7048   4
  -9  10  -1 59.3808 11.1901   4
   9  10   1 66.0816 10.0542   1
  -8  11   1 85.3799 13.3797   4
   8  11  -1 65.6299 12.4418   4
   8  11  -1 95.5806 10.1190   1
  -7  11   1 8.65565 6.87093   4
   7  11  -1 7.64998 7.20445   4
   6  11  -1 4.85895 6.19846   4
  -6  11   1 -10.386 4.28811   4
   5  11  -1 13.3651 7.03574   4
  -5  11   1 5.62166 5.90008   4
  -4  11   1 51.8807 9.98109   4
   4  11  -1 77.8018 11.0756   4
   3  11  -1 9.03935 5.71716   4
  -3  11   1 13.6107 6.17383   4
   2  11  -1 33.0171 7.96941   4
  -2  11   1 31.6753 7.86495   4
   1  11  -1 42.8570 8.56734   4
  -1  11   1 51.0367 9.47521   4
   0  11  -1 35.5528 7.93817   4
   0  11   1 32.1553 8.29808   4
  -1  11  -1 44.2358 8.53077   4
   1  11   1 62.5536 10.2859   4
  -2 -11  -1 21.3735 7.52882   2
   2  11   1 35.5312 9.13141   4
  -2  11  -1 20.7389 6.63290   4
  -3 -11  -1 6.27287 4.61858   2
  -3 -11  -1 7.61671 6.06158   1
  -3  11  -1 7.85666 5.24092   4
   3  11   1 8.00781 6.51610   4
  -4 -11  -1 115.345 13.1398   1
  -4 -11  -1 101.596 11.5315   2
   4  11   1 114.437 13.7219   4
  -4  11  -1 106.344 12.6904   4
  -5 -11  -1 31.6558 7.40861   2
  -5 -11  -1 28.0939 8.33716   1
  -5  11  -1 29.7356 7.63108   4
   5  11   1 19.8043 7.98732   4
  -6 -11  -1 17.2082 7.75621   1
  -6 -11  -1 12.8668 6.49321   2
   6  11   1 24.9943 8.32804   4
  -6  11  -1 20.2218 7.47468   4
   6  11   1 16.5909 5.85334   1
  -7 -11  -1 35.6585 8.99742   1
  -7 -11  -1 30.8705 8.46302   2
  -7  11  -1 35.3098 8.96785   4
   7  11   1 42.8306 9.95853   4
   7  11   1 31.9766 7.69497   1
  -5  12   1 12.5408 7.38594   4
   5  12  -1 13.6754 7.49180   4
  -4  12   1 -10.542 4.85985   4
   4  12  -1 -6.2733 5.34664   4
  -3  12   1 17.7078 7.83973   4
   3  12  -1 18.7526 7.75064   4
   2  12  -1 1.94775 5.36675   4
  -2  12   1 -2.3546 4.86436   4
  -1  12   1 98.4387 13.1106   4
   1  12  -1 97.8095 12.8548   4
   0  12  -1 9.38878 6.74324   4
   0  12   1 -8.4504 4.22380   4
  -1  12  -1 4.77192 5.90301   4
   1  12   1 -2.3259 5.06592   4
   2  12   1 -6.7044 4.55112   4
  -2  12  -1 12.1775 6.68071   4
  -3  12  -1 22.4315 7.53669   4
   3  12   1 29.8190 8.70649   4
  -4  12  -1 28.2857 7.99172   4
   4  12   1 40.5378 10.0079   4
  -5  12  -1 12.0026 6.48347   4
   5  12   1 15.9061 7.79600   4
  -1  13   1 28.1103 9.12242   4
   1  13  -1 29.5375 8.64296   4
   0  13  -1 3.44742 6.00516   4
   0  13   1 -0.7261 6.29867   4
   1  13   1 98.3235 14.4463   4
  -1  13  -1 79.3365 12.2824   4
  14   0  -2 -2.7257 5.45607   4
  14   0  -2 -1.0544 5.41491   1
  13   0  -2 4.77607 5.73429   1
  12   0  -2 287.102 17.2046   1
  11   0  -2 -5.2111 3.60141   1
  10   0  -2 354.733 16.8962   1
   9   0  -2 -3.7501 3.23736   1
   8   0  -2 386.606 15.4961   1
   7   0  -2 -3.3685 2.62883   1
   6   0  -2 3950.29 59.6572   1
   5   0  -2 1.12304 2.52528   1
   4   0  -2 313.382 9.98697   1
   3   0  -2 -2.2623 1.92209   1
   2   0  -2 1469.38 21.8782   1
  -1   0   2 -0.2443 1.02027   4
   1   0  -2 0.35164 1.03438   1
   1   0  -2 -0.7751 1.36779   2
   1   0  -2 0.24837 1.49646   3
   0   0  -2 1162.46 17.5096   2
   0   0  -2 1146.87 18.1861   3
   0   0  -2 1177.27 15.4959   4
  -1   0  -2 -0.6798 1.47678   3
  -1   0  -2 -0.6395 1.35479   2
  -2   0  -2 335.160 9.08686   2
  -2   0  -2 332.663 7.17914   1
  -2   0  -2 356.936 8.89435   1
   2   0   2 347.243 7.62452   1
   2   0   2 324.893 7.39895   4
  -3   0  -2 0.27248 1.91535   1
  -3   0  -2 -1.4652 2.19249   2
   3   0   2 -2.9296 1.67160   4
   3   0   2 -1.4793 1.99008   1
   4   0   2 740.121 15.3470   4
  -4   0  -2 704.586 15.1138   1
  -4   0  -2 716.738 17.6389   2
   4   0   2 743.349 15.8794   1
   5   0   2 -0.4066 2.28610   1
   5   0   2 -3.7265 1.93146   4
  -5   0  -2 0.48935 2.52103   1
  -6   0  -2 2002.66 34.5046   1
   6   0   2 1999.08 35.3510   1
   6   0   2 1964.86 34.3510   4
   7   0   2 1.47638 2.89348   1
   7   0   2 -1.3866 2.74680   4
  -7   0  -2 0.51491 2.87822   1
   8   0   2 1415.55 30.1918   4
  -8   0  -2 1371.43 29.9203   1
   8   0   2 1345.07 30.8049   1
   9   0   2 3.70883 3.57173   4
  -9   0  -2 -3.5547 3.70557   1
   9   0   2 -2.8018 3.47053   1
 -10   0  -2 613.530 21.1380   1
  10   0   2 635.147 21.4686   4
  10   0   2 640.291 22.7593   1
 -11   0  -2 -1.1353 4.24733   1
  11   0   2 -7.9889 3.37232   4
 -11   0  -2 -0.3214 5.49465   2
  11   0   2 -3.7365 3.66447   1
 -12   0  -2 341.993 17.4243   1
  12   0   2 309.572 18.1809   1
 -12   0  -2 327.799 20.5540   2
 -13   0  -2 -3.5307 6.10940   2
 -13   0  -2 -3.1155 4.63423   1
  13   0   2 -1.9637 5.20142   1
 -14   0  -2 145.367 14.5730   1
 -14   0  -2 125.762 17.3307   2
  14   0   2 125.247 15.9221   1
  14  -1  -2 73.8978 12.4053   1
  14   1  -2 89.6299 13.5008   4
  14   1  -2 88.5981 13.7139   1
  13  -1  -2 3.25481 5.74093   1
  13   1  -2 -0.7898 5.06240   4
  13   1  -2 -3.8082 4.58774   1
  12  -1  -2 42.5127 9.21340   1
  12   1  -2 36.3236 8.65785   1
  11  -1  -2 180.975 13.4977   1
  11   1  -2 182.161 13.4978   1
  10  -1  -2 228.764 14.1369   1
  10   1  -2 203.694 9.70785   3
  10   1  -2 191.109 13.0589   1
   9  -1  -2 85.0229 9.70157   1
   9   1  -2 83.3411 6.67122   3
   9   1  -2 89.9007 9.70588   1
   8  -1  -2 6.05224 3.90711   1
   8   1  -2 5.34857 2.81539   3
   8   1  -2 11.6821 4.67965   1
   7  -1  -2 300.476 12.8047   1
   7   1  -2 291.820 10.0201   3
   7   1  -2 290.272 12.3894   1
   6  -1  -2 714.826 18.8354   1
   6   1  -2 690.696 15.5190   3
   6   1  -2 700.569 18.1917   1
   5  -1  -2 827.860 19.2922   1
  -5   1   2 848.088 19.8064   4
   5   1  -2 836.809 16.9139   3
   5   1  -2 887.776 19.2007   1
   4  -1  -2 521.927 13.5678   1
  -4   1   2 534.505 13.7798   4
   4   1  -2 522.445 12.2289   3
   4   1  -2 525.823 13.0061   1
   3  -1  -2 1.31253 2.23105   1
   3   1  -2 -0.3446 1.78283   1
   3   1  -2 -2.3570 1.77154   3
  -3   1   2 -2.0789 2.10834   4
   2  -1  -2 4213.37 54.7854   1
  -2   1   2 4161.93 54.9347   4
   2   1  -2 4141.54 52.3240   1
   2   1  -2 4173.30 54.8176   3
   1  -1  -2 521.470 10.3472   1
   1  -1  -2 522.783 11.2598   2
  -1   1   2 547.438 10.6505   4
   1   1  -2 541.438 11.3761   3
   0  -1  -2 252.350 7.14742   2
   0  -1  -2 252.020 6.24829   1
   0   1   2 253.113 6.31902   1
   0   1   2 246.238 6.27440   4
   0   1  -2 256.570 5.24242   2
  -1  -1  -2 3.47393 2.22413   2
  -1  -1  -2 5.83731 2.04184   1
  -1  -1  -2 2.46534 1.86724   3
   1   1   2 3.38830 1.80515   4
   1   1   2 6.89772 1.93258   1
  -1   1  -2 7.26597 1.62565   2
  -2  -1  -2 1120.35 20.3719   2
  -2  -1  -2 1145.89 16.8830   3
  -2  -1  -2 1142.79 18.8810   1
   2   1   2 1126.09 18.7214   1
  -2   1  -2 1143.69 17.9001   4
  -2   1  -2 1119.75 18.3948   2
   2   1   2 1120.73 18.8156   4
  -2   1  -2 1158.95 16.7311   4
  -3  -1  -2 342.596 9.75600   1
  -3  -1  -2 340.747 11.0089   2
   3  -1   2 359.275 8.38134   4
   3  -1   2 355.958 8.57456   1
   3   1   2 330.199 9.70898   4
  -3   1  -2 356.594 7.60529   1
  -3   1  -2 362.829 7.68494   1
   3   1   2 340.050 9.71089   1
  -3   1  -2 349.650 8.89558   4
   4  -1   2 1097.13 19.9384   1
  -4  -1  -2 1058.68 23.1190   2
  -4  -1  -2 1124.31 21.3520   1
   4  -1   2 1092.27 19.2532   4
   4   1   2 1092.15 21.0611   4
  -4   1  -2 1093.27 18.8570   1
   4   1   2 1091.93 21.1629   1
  -5  -1  -2 405.342 14.5199   2
  -5  -1  -2 417.374 12.8486   1
   5  -1   2 406.556 12.0536   1
   5  -1   2 417.545 11.5378   4
  -5   1  -2 416.704 11.4582   1
   5   1   2 421.920 12.8624   4
   5   1   2 431.763 13.1634   1
   6  -1   2 1238.92 24.1716   4
  -6  -1  -2 1194.75 25.4948   1
  -6  -1  -2 1214.07 28.7613   2
   6  -1   2 1213.72 25.0068   1
   6   1   2 1235.70 26.2212   1
   6   1   2 1217.51 25.4437   4
  -6   1  -2 1197.47 23.8842   1
  -7  -1  -2 153.899 10.8037   2
  -7  -1  -2 133.661 9.02590   1
   7  -1   2 129.527 8.69488   1
   7  -1   2 152.187 8.48547   4
  -7   1  -2 135.129 8.24691   1
   7   1   2 136.266 9.23519   1
   7   1   2 138.613 8.99438   4
  -8  -1  -2 261.717 12.8539   1
  -8  -1  -2 252.714 14.7403   2
   8  -1   2 250.457 12.5763   1
   8  -1   2 242.611 11.5843   4
   8   1   2 271.492 13.4670   1
  -8   1  -2 247.756 11.8406   1
   8   1   2 269.408 12.8769   4
  -9  -1  -2 24.3365 7.01525   2
  -9  -1  -2 10.9393 5.02867   1
   9  -1   2 15.7202 4.68833   4
   9  -1   2 8.95622 5.08433   1
  -9   1  -2 11.5432 4.90927   1
   9   1   2 15.8726 5.07882   4
   9   1   2 8.51378 5.04888   1
  10  -1   2 225.407 13.9262   1
 -10  -1  -2 241.154 16.3595   2
  10  -1   2 213.847 12.6397   4
 -10  -1  -2 239.719 14.1193   1
  10   1   2 221.667 14.2651   1
  10   1   2 206.377 13.0861   4
 -10   1  -2 214.550 12.6047   1
 -11  -1  -2 400.256 18.4230   1
  11  -1   2 426.345 19.6017   1
 -11  -1  -2 359.051 20.6919   2
 -11   1  -2 384.641 17.0992   1
  11   1   2 406.300 19.4374   1
  11   1   2 437.787 19.0462   4
 -12  -1  -2 5.45308 7.02687   2
  12  -1   2 12.5830 6.64105   1
 -12  -1  -2 1.77422 5.19837   1
 -12   1  -2 13.3927 5.88765   1
  12   1   2 4.63194 6.01966   1
  13  -1   2 3.71383 5.51215   1
 -13  -1  -2 -8.0936 5.76391   2
 -13  -1  -2 -1.8313 4.95660   1
 -13   1  -2 8.85785 5.86993   1
 -13   1  -2 4.28522 7.00878   2
  13   1   2 3.34454 5.92116   1
 -14  -1  -2 19.2857 7.97323   1
 -14  -1  -2 3.64481 7.05236   2
  14  -1   2 10.4207 7.00008   1
 -14   1  -2 9.78522 8.10242   2
 -14   1  -2 10.8205 5.92004   1
  14   1   2 9.82151 7.12252   1
  14  -2  -2 141.265 15.5899   1
  14   2  -2 119.334 14.9414   4
  14   2  -2 162.663 17.9353   1
  13  -2  -2 -3.7691 4.32319   1
  13   2  -2 -0.5494 5.38351   1
  13   2  -2 -2.6171 4.98273   4
  12  -2  -2 151.499 14.5727   1
  12   2  -2 138.179 13.8605   1
  12   2  -2 165.591 15.8836   4
  11  -2  -2 1.26166 5.02648   1
  11   2  -2 -1.1717 4.10872   1
  11   2  -2 3.68904 5.04678   4
  10  -2  -2 300.720 16.0574   1
  10   2  -2 276.579 15.0192   1
   9  -2  -2 7.40895 4.88107   1
   9   2  -2 6.87573 4.58001   1
   9   2  -2 12.0228 3.17007   3
   8  -2  -2 111.006 10.7924   1
   8   2  -2 122.605 10.3956   1
   8   2  -2 100.570 6.15423   3
   7  -2  -2 -1.6394 2.73632   1
   7   2  -2 0.61794 1.95393   3
  -7   2   2 0.95525 3.41332   4
   7   2  -2 2.17816 3.05962   1
   6  -2  -2 144.513 8.77103   1
   6   2  -2 154.788 6.59615   3
   6   2  -2 159.345 8.74734   1
  -6   2   2 159.627 9.22878   4
   5  -2  -2 150.058 8.28901   1
   5   2  -2 143.458 6.33150   3
   5   2  -2 152.067 7.63092   1
  -5   2   2 134.948 8.08845   4
   4  -2  -2 13.5869 3.41694   1
  -4   2   2 15.6210 3.64650   4
   4   2  -2 15.6514 3.03754   1
   4   2  -2 16.1378 3.05301   3
   3  -2  -2 410.790 11.4083   1
  -3   2   2 405.785 11.5681   4
   3   2  -2 415.315 9.95713   1
   2  -2  -2 55.3634 4.46579   1
   2  -2  -2 65.9982 5.11247   2
  -2   2   2 61.6426 5.05346   4
   2   2  -2 56.3436 3.23061   1
   1  -2  -2 1756.99 26.9911   1
   1  -2  -2 1732.29 27.4839   2
  -1   2   2 1756.58 27.1990   4
   0  -2  -2 75.1522 4.88935   2
   0  -2  -2 75.7769 4.81205   1
   0   2   2 69.1183 4.66016   1
   0   2   2 78.2046 5.04078   4
  -1  -2  -2 577.914 12.6941   1
  -1  -2  -2 582.924 13.2930   2
   1   2   2 600.341 12.7397   1
  -1   2  -2 592.633 8.64376   2
   1   2   2 599.709 12.7963   4
  -2  -2  -2 17.6700 3.52271   2
  -2  -2  -2 19.2822 3.24261   1
  -2   2  -2 20.7483 2.34942   4
   2   2   2 12.6406 2.59615   1
   2   2   2 26.4084 3.71411   4
  -3  -2  -2 967.956 19.4094   1
  -3  -2  -2 942.240 14.3558   3
  -3  -2  -2 997.048 20.9308   2
   3   2   2 964.979 19.4038   4
   3   2   2 997.640 19.4574   1
  -3   2  -2 956.956 16.8603   4
   4  -2   2 67.0270 4.70146   1
  -4  -2  -2 78.4477 6.70684   1
   4  -2   2 86.5567 4.67680   4
  -4  -2  -2 74.6068 6.97852   2
  -4   2  -2 80.2180 4.13320   1
   4   2   2 75.2500 6.28694   4
  -4   2  -2 74.0238 5.11299   4
   4   2   2 77.0645 5.97768   1
  -4   2  -2 80.4150 4.15705   1
   5  -2   2 28.1558 3.75083   4
   5  -2   2 25.5557 4.25892   1
  -5  -2  -2 28.3718 5.02573   1
  -5  -2  -2 27.1244 5.10538   2
   5   2   2 27.6925 5.06386   1
   5   2   2 24.1843 4.41475   4
  -5   2  -2 24.2151 4.03104   4
  -5   2  -2 35.1179 4.11782   1
  -5   2  -2 27.0250 3.50997   1
   6  -2   2 142.041 7.40653   4
   6  -2   2 139.609 8.01182   1
  -6  -2  -2 132.962 9.72444   2
  -6  -2  -2 135.950 8.81826   1
   6   2   2 150.043 9.04023   1
  -6   2  -2 141.452 8.42272   4
   6   2   2 125.129 8.23939   4
   7  -2   2 118.999 7.75809   4
   7  -2   2 133.220 8.86498   1
  -7  -2  -2 140.305 10.9077   2
  -7  -2  -2 131.625 9.44340   1
   7   2   2 125.749 8.82620   4
   7   2   2 144.392 9.61861   1
   8  -2   2 22.2999 4.87782   4
  -8  -2  -2 13.1504 4.81033   1
   8  -2   2 8.44770 4.36349   1
  -8  -2  -2 -2.0452 4.31904   2
   8   2   2 7.93658 4.83463   1
   8   2   2 8.87562 4.63139   4
  -8   2  -2 11.9461 4.09327   1
   9  -2   2 569.149 19.9636   1
   9  -2   2 527.450 17.7393   4
  -9  -2  -2 565.657 20.3557   1
  -9  -2  -2 551.407 23.0558   2
   9   2   2 576.379 20.8727   1
   9   2   2 542.419 19.9644   4
  -9   2  -2 572.974 18.1722   1
 -10  -2  -2 565.543 21.5947   1
 -10  -2  -2 567.981 24.7770   2
  10  -2   2 601.778 21.8623   1
  10   2   2 594.261 22.3645   1
  10   2   2 618.396 22.1821   4
 -10   2  -2 575.489 19.3938   1
  11  -2   2 25.5551 7.75648   1
 -11  -2  -2 33.5067 9.26393   2
 -11  -2  -2 41.1249 8.05239   1
  11   2   2 34.5130 7.89523   4
  11   2   2 31.1164 7.78966   1
 -11   2  -2 25.1273 6.21390   1
 -12  -2  -2 268.273 19.6471   2
 -12  -2  -2 299.571 17.6357   1
  12  -2   2 312.372 18.1451   1
  12   2   2 301.994 17.5593   4
 -12   2  -2 265.562 14.7955   1
  12   2   2 282.711 17.7713   1
 -13  -2  -2 71.8374 12.5875   2
 -13  -2  -2 62.7083 10.7139   1
  13  -2   2 51.7753 9.76774   1
  13   2   2 55.2040 10.7857   1
 -13   2  -2 63.2920 9.29118   1
  14  -2   2 60.8102 11.3618   1
 -14  -2  -2 61.2973 12.8242   2
 -14  -2  -2 51.8411 9.92414   1
 -14   2  -2 59.0616 9.47801   1
  14   2   2 99.4420 14.9156   1
 -14   2  -2 67.6746 12.9537   2
  14  -3  -2 4.67281 6.54349   1
 -14  -3   2 4.70438 6.55366   1
  14   3  -2 -0.0750 4.87394   1
  14   3  -2 7.84307 6.52731   4
  13  -3  -2 4.08409 5.75322   1
  13   3  -2 2.61525 4.78739   1
  13   3  -2 6.35048 5.95304   4
  12  -3  -2 44.5476 8.88849   1
  12   3  -2 39.0230 8.34526   1
  12   3  -2 62.8901 10.2916   4
  11  -3  -2 30.1654 7.43033   1
  11   3  -2 30.9443 7.48922   4
  11   3  -2 18.5631 6.30601   1
  10  -3  -2 -5.3376 4.04283   1
  10   3  -2 -3.1384 3.44278   1
  10   3  -2 -0.0983 4.23462   4
   9  -3  -2 1243.29 31.8601   1
  -9   3   2 1227.97 32.3781   4
   9   3  -2 1159.86 29.9806   1
   9   3  -2 1233.95 31.7599   4
   8  -3  -2 8.29916 5.10995   1
   8   3  -2 7.74914 4.08852   1
  -8   3   2 11.2402 4.81743   4
   7  -3  -2 45.7178 6.81525   1
   7   3  -2 39.4889 6.18984   1
  -7   3   2 41.5474 6.64181   4
   6  -3  -2 -4.4750 2.45834   1
  -6   3   2 -0.0584 2.92959   4
   6   3  -2 2.27911 2.58569   1
   5   3  -2 237.378 9.57047   1
  -5   3   2 277.385 11.8150   4
   4  -3  -2 580.151 15.8117   1
  -4   3   2 576.723 15.9781   4
   4   3  -2 575.561 13.8794   1
   3  -3  -2 470.286 13.2316   1
   3   3  -2 455.826 10.7310   1
  -3   3   2 458.373 13.3150   4
   2  -3  -2 100.584 6.16906   1
   2  -3  -2 109.958 6.24517   2
   2   3  -2 115.569 4.21690   1
  -2   3   2 120.007 6.92254   4
   1  -3  -2 8.44622 2.99930   2
   1  -3  -2 14.9866 3.23599   1
  -1   3   2 10.3099 3.09289   4
   1   3  -2 13.8799 2.26593   4
   0  -3  -2 602.394 14.0667   1
   0  -3  -2 599.359 14.1386   2
   0   3   2 594.222 13.8963   1
   0   3  -2 617.576 10.5477   4
   0   3   2 594.679 14.0363   4
  -1  -3  -2 77.9253 5.51997   1
  -1  -3  -2 74.6060 5.51988   2
  -1   3  -2 88.5220 3.70632   4
   1   3   2 75.5095 5.53193   4
   1   3   2 76.3603 5.34173   1
  -2  -3  -2 118.930 6.70498   1
  -2  -3  -2 105.238 6.61296   2
  -2   3  -2 112.875 4.76536   4
   2   3   2 108.214 6.63725   4
   2   3   2 108.655 6.34818   1
  -3  -3  -2 216.621 9.74570   2
  -3  -3  -2 228.222 9.45786   1
   3   3   2 201.456 8.94254   4
  -3   3  -2 207.748 7.21026   4
   3   3   2 229.664 9.20442   1
  -4  -3  -2 969.026 23.1296   2
  -4  -3  -2 1000.63 22.2717   1
   4  -3   2 1028.22 19.2977   1
  -4   3  -2 997.389 19.6529   4
   4   3   2 990.339 21.7441   1
   4   3   2 971.993 21.8078   4
  -5  -3  -2 1365.24 30.2663   2
  -5  -3  -2 1353.16 28.1496   1
   5  -3   2 1307.89 24.9015   1
  -5   3  -2 1342.22 21.7608   1
  -5   3  -2 1338.99 25.9441   4
   5   3   2 1384.97 28.2868   4
   5   3   2 1335.97 27.7121   1
   6  -3   2 35.0166 5.07530   1
  -6  -3  -2 30.9599 5.52960   1
  -6  -3  -2 41.6939 6.57354   2
   6   3   2 32.2467 5.77616   1
  -6   3  -2 36.9408 4.41299   1
  -6   3  -2 28.0326 5.10069   4
   6   3   2 31.3074 5.48249   4
   7  -3   2 8.33082 3.57370   1
  -7  -3  -2 3.04490 4.06446   1
  -7  -3  -2 3.47826 4.00592   2
  -7   3  -2 7.86164 3.82566   4
   7   3   2 5.36522 4.01249   1
  -7   3  -2 0.43828 2.63072   1
   7   3   2 3.30099 3.62785   4
   8  -3   2 99.9825 10.0565   1
   8  -3   2 93.6601 8.40071   4
  -8  -3  -2 96.4138 11.4717   2
  -8  -3  -2 90.2828 9.93248   1
  -8   3  -2 99.4449 9.85322   4
   8   3   2 105.220 10.9508   1
   8   3   2 115.302 10.8511   4
   9  -3   2 167.970 11.6238   1
  -9  -3  -2 159.841 12.3012   1
  -9  -3  -2 179.224 14.2249   2
  -9   3  -2 151.117 9.73277   1
   9   3   2 160.868 13.2017   4
   9   3   2 162.201 12.2310   1
 -10  -3  -2 71.9395 11.2132   2
 -10  -3  -2 59.3162 9.25981   1
  10  -3   2 47.0485 8.17540   1
 -10   3  -2 54.9976 7.33346   1
  10   3   2 43.6949 8.70061   1
  10   3   2 45.7393 8.14051   4
 -11  -3  -2 -1.7530 4.84774   1
 -11  -3  -2 -2.8872 5.19452   2
  11  -3   2 10.2247 5.87991   1
  11   3   2 -3.4462 4.68732   1
 -11   3  -2 -0.6930 3.69421   1
  11   3   2 3.39116 5.30521   4
 -12  -3  -2 13.8582 6.82763   1
  12  -3   2 5.95271 5.93955   1
 -12  -3  -2 9.73504 7.05500   2
  12   3   2 15.0888 6.45645   4
  12   3   2 12.4289 6.91512   1
 -12   3  -2 5.10321 4.61435   1
 -13  -3  -2 1.44713 6.58501   2
  13  -3   2 -7.1167 5.03976   1
 -13  -3  -2 2.77901 5.78886   1
 -13   3  -2 -2.3219 4.30508   1
  13   3   2 3.02437 5.33775   1
 -14  -3  -2 16.2737 7.95281   1
 -14  -3  -2 7.03485 7.46536   2
 -14   3  -2 18.1570 6.47329   1
  14   3   2 6.95852 6.03024   1
 -14  -4   2 41.7246 11.4507   1
  14  -4  -2 45.1698 10.4497   1
 -14  -4   2 34.8497 11.3899   2
  14   4  -2 52.3983 10.7188   1
  14   4  -2 53.8647 11.5465   4
 -13  -4   2 3.13318 7.23976   2
  13  -4  -2 1.02850 5.79564   1
 -13  -4   2 7.76282 7.16467   1
  13   4  -2 2.21010 4.82932   1
  13   4  -2 -0.9953 5.41304   4
  12  -4  -2 12.7050 6.26427   1
  12   4  -2 18.1073 7.59048   4
  12   4  -2 20.7076 6.90752   1
  11  -4  -2 134.904 13.4725   1
  11   4  -2 156.433 15.0617   4
  11   4  -2 157.905 14.7041   1
  10  -4  -2 126.045 13.6881   1
  10   4  -2 86.4764 10.2557   1
  10   4  -2 103.317 11.6319   4
 -10   4   2 84.6103 10.8479   4
   9  -4  -2 258.678 14.6364   1
  -9   4   2 201.379 13.7384   4
   9   4  -2 244.073 14.5250   4
   9   4  -2 202.557 12.5765   1
   8  -4  -2 375.769 16.6886   1
   8   4  -2 382.773 16.7807   4
   8   4  -2 379.862 15.4683   1
  -8   4   2 384.457 17.1056   4
   7  -4  -2 324.338 14.7337   1
   7   4  -2 314.982 14.2976   4
  -7   4   2 325.046 14.9547   4
   7   4  -2 349.621 13.7091   1
   6  -4  -2 42.1995 6.92019   1
  -6   4   2 45.4675 6.71589   4
   6   4  -2 48.0903 5.90579   1
   6   4  -2 35.7044 5.94654   4
   5  -4  -2 282.330 12.1453   1
   5   4  -2 282.301 10.5450   1
  -5   4   2 280.213 12.3420   4
   5   4  -2 262.880 11.4113   4
   4  -4  -2 1230.49 26.4066   1
  -4   4   2 1285.48 27.1451   4
   4   4  -2 1267.91 25.4043   4
   4   4  -2 1286.08 23.3970   1
   3  -4  -2 58.6480 5.90553   1
   3   4  -2 63.4205 4.53731   1
   3   4  -2 61.2899 5.47846   4
  -3   4   2 75.5247 7.06257   4
   2  -4  -2 6.01782 2.87042   2
   2  -4  -2 5.01421 2.63864   1
  -2  -4   2 5.94476 2.24813   2
   2   4  -2 5.72436 1.75789   1
   2   4  -2 5.81986 2.40387   4
  -2   4   2 7.66010 3.14033   4
  -1  -4   2 861.719 14.4289   2
   1  -4  -2 820.049 18.5786   1
   1  -4  -2 853.697 18.5837   2
   1   4  -2 850.417 16.2037   4
  -1   4   2 864.689 19.3645   4
   0  -4   2 74.9824 2.67093   2
   0  -4  -2 80.0684 5.75580   2
   0  -4  -2 88.1226 6.15790   1
   0   4  -2 89.2364 4.71170   4
   0   4   2 77.5465 6.62311   4
   0   4   2 90.6845 6.04021   1
  -1  -4  -2 737.787 17.3616   2
  -1  -4  -2 694.409 17.0511   1
   1   4   2 730.371 17.3951   4
  -1   4  -2 733.492 14.0392   4
   1   4   2 727.671 16.9588   1
  -2  -4  -2 23.4280 4.61708   1
  -2  -4  -2 29.7653 4.72369   2
   2   4   2 27.7747 4.88297   4
   2   4   2 34.1016 4.99210   1
  -2   4  -2 40.9321 4.00429   4
  -3  -4  -2 62.6520 6.14140   1
  -3  -4  -2 60.5727 6.50371   2
   3   4   2 57.9339 6.01540   1
   3   4   2 62.9477 6.34646   4
  -3   4  -2 58.4461 5.14402   4
   4  -4   2 181.790 7.74872   1
  -4  -4  -2 189.815 10.4417   2
   4   4   2 189.868 9.63126   1
   4   4   2 196.468 9.89782   4
  -4   4  -2 181.438 8.16091   4
  -5  -4  -2 213.575 11.8306   2
   5  -4   2 213.768 9.33252   1
  -5  -4  -2 223.449 11.4562   1
   5   4   2 242.189 11.5062   4
  -5   4  -2 215.488 9.66185   4
   5   4   2 203.944 10.5712   1
   6  -4   2 55.2948 6.48339   1
  -6  -4  -2 52.5379 7.00631   1
  -6  -4  -2 48.8694 7.50317   2
  -6   4  -2 55.4459 6.63085   4
  -6   4  -2 57.4477 4.57382   1
   6   4   2 39.1292 6.02261   1
   6   4   2 44.2944 6.57226   4
   7  -4   2 698.591 20.2262   1
  -7  -4  -2 701.584 22.3119   1
  -7  -4  -2 745.915 24.6261   2
  -7   4  -2 716.818 16.1005   1
  -7   4  -2 737.626 21.0923   4
   7   4   2 711.006 21.8522   1
   7   4   2 689.054 21.9867   4
  -8  -4  -2 1051.56 29.0714   1
   8  -4   2 1025.30 26.4915   1
  -8  -4  -2 1025.98 30.9982   2
   8   4   2 1002.47 27.8521   4
  -8   4  -2 1004.01 21.4250   1
   8   4   2 1024.67 27.8994   1
  -8   4  -2 948.010 25.9891   4
   9  -4   2 185.539 12.1882   1
  -9  -4  -2 160.593 12.8633   1
  -9  -4  -2 169.362 15.6647   2
  -9   4  -2 182.573 9.76605   1
   9   4   2 169.110 12.5755   1
   9   4   2 179.447 12.9371   4
  -9   4  -2 177.510 12.4329   4
 -10  -4  -2 9.21630 6.04304   1
  10  -4   2 -0.9547 4.21357   1
 -10  -4  -2 13.0603 6.37167   2
 -10   4  -2 7.86945 4.24797   1
  10   4   2 13.8871 5.46868   1
  10   4   2 6.53366 5.55914   4
 -11  -4  -2 90.5626 12.5450   1
 -11  -4  -2 81.4485 12.7658   2
  11  -4   2 93.9578 11.8877   1
  11   4   2 75.9634 11.7707   1
  11   4   2 81.1323 11.1871   4
 -11   4  -2 76.2969 8.51839   1
 -12  -4  -2 2.44849 5.77065   1
 -12  -4  -2 6.60350 6.65137   2
 -12   4  -2 5.46499 4.46055   1
  12   4   2 5.73736 6.09014   1
  12   4   2 -11.570 4.63332   4
 -13  -4  -2 37.3235 10.1326   2
 -13  -4  -2 23.9329 7.79032   1
  13   4   2 14.9433 7.05836   1
  13   4   2 24.9328 10.0942   4
 -13   4  -2 27.0457 6.26470   1
 -13  -5   2 107.411 15.0018   1
  13  -5  -2 130.883 16.2301   1
 -13  -5   2 130.784 17.7381   2
  13   5  -2 117.510 14.7779   4
  13   5  -2 120.495 13.4463   1
  12  -5  -2 17.6390 7.63812   1
 -12  -5   2 16.7047 7.34596   1
 -12  -5   2 10.4505 7.21733   2
  12   5  -2 14.0278 6.06430   1
  12   5  -2 13.1132 6.90261   4
 -11  -5   2 70.1754 10.7154   1
  11  -5  -2 79.5079 11.6470   1
 -11  -5   2 77.0223 12.5904   2
  11   5  -2 81.3383 10.1988   1
 -11   5   2 79.6651 11.5499   4
  11   5  -2 79.9865 11.5121   4
 -10  -5   2 -4.7042 4.94262   2
  10  -5  -2 4.42531 4.89199   1
 -10   5   2 1.60760 5.03086   4
  10   5  -2 1.84204 4.20266   1
  10   5  -2 1.60716 4.78221   4
   9  -5  -2 56.2473 8.71602   1
  -9  -5   2 56.7046 9.52156   2
  -9   5   2 70.4392 9.92353   4
   9   5  -2 81.0075 10.0334   1
   9   5  -2 75.4772 10.1109   4
  -8  -5   2 217.308 14.3484   2
   8  -5  -2 223.617 13.7712   1
   8   5  -2 234.839 13.7974   4
  -8   5   2 207.779 13.8011   4
   8   5  -2 201.564 11.8166   1
   7  -5  -2 0.75704 4.31072   1
  -7  -5   2 4.10579 4.41681   2
  -7   5   2 -0.0252 4.28537   4
   7   5  -2 2.00994 3.80751   4
   7   5  -2 2.52777 3.50148   1
  -6  -5   2 472.021 17.5967   2
   6  -5  -2 448.515 16.9068   1
   6   5  -2 464.044 16.9185   4
  -6   5   2 480.494 17.7428   4
   6   5  -2 435.685 14.7257   1
   5  -5  -2 30.4540 5.42226   1
  -5  -5   2 34.1686 5.94060   2
   5   5  -2 32.2473 5.02460   1
   5   5  -2 33.6554 5.71454   4
  -5   5   2 27.2784 5.50156   4
  -4  -5   2 25.7202 4.73679   2
   4  -5  -2 24.4495 4.71360   1
  -4   5   2 28.6912 5.51953   4
   4   5  -2 30.7974 5.04209   4
   4   5  -2 25.9710 3.95212   1
   3  -5  -2 473.927 14.6106   2
   3  -5  -2 471.078 15.1945   1
  -3  -5   2 482.780 13.5302   2
   3   5  -2 474.730 11.6153   1
   3   5  -2 471.829 14.1689   4
  -3   5   2 484.864 15.8313   4
  -2  -5   2 39.7796 4.28979   2
   2  -5  -2 49.9052 5.68940   2
  -2  -5   2 36.8609 4.63963   1
   2  -5  -2 47.0880 5.81741   1
  -2   5   2 37.0963 5.47225   4
   2   5  -2 43.6485 5.02515   4
   1  -5  -2 108.042 7.39475   1
   1  -5  -2 101.335 6.72329   2
  -1  -5   2 103.016 4.69105   2
  -1  -5   2 105.917 5.96668   1
   1   5  -2 105.550 6.23173   4
  -1   5   2 100.604 7.55043   4
   0  -5   2 470.033 8.75595   2
   0  -5  -2 478.057 14.6169   1
   0  -5  -2 487.465 14.1503   2
   0   5  -2 483.273 12.3905   4
   0   5   2 463.093 14.8163   4
   0   5   2 452.425 13.8427   1
  -1  -5  -2 291.036 11.5909   1
  -1  -5  -2 283.399 11.0719   2
   1   5   2 287.996 11.6318   4
  -1   5  -2 314.526 9.69471   4
   1   5   2 288.248 11.1946   1
  -2  -5  -2 478.211 15.2701   1
  -2  -5  -2 462.260 14.8128   2
   2   5   2 527.127 15.9671   4
  -2   5  -2 479.413 12.7117   4
   2   5   2 437.086 14.1149   1
   3  -5   2 381.053 14.0729   1
  -3  -5  -2 340.121 13.4681   1
  -3  -5  -2 349.929 13.3927   2
   3   5   2 342.487 12.8107   1
   3   5   2 325.487 13.1270   4
  -3   5  -2 367.791 11.4760   4
  -4  -5  -2 -0.6421 2.67092   2
  -4  -5  -2 2.31912 3.27072   1
   4  -5   2 1.69467 2.51329   1
  -4   5  -2 -0.8870 2.36969   4
   4   5   2 2.03315 2.95468   1
   4   5   2 9.39900 3.96716   4
  -5  -5  -2 1.89532 3.25321   1
   5  -5   2 1.01949 2.98935   1
  -5  -5  -2 0.01708 3.58627   2
   5   5   2 -1.4869 3.03876   1
  -5   5  -2 0.61076 2.81345   4
   5   5   2 -2.9172 3.13891   4
  -6  -5  -2 422.352 17.1291   1
  -6  -5  -2 417.613 17.6890   2
   6  -5   2 374.818 14.1658   1
   6   5   2 402.708 15.9758   1
  -6   5  -2 401.700 14.8267   4
   6   5   2 399.958 16.5926   4
   7  -5   2 10.9035 4.37009   1
  -7  -5  -2 14.8737 5.99761   2
  -7  -5  -2 5.49514 5.14772   1
  -7   5  -2 11.2343 4.93728   4
   7   5   2 10.5011 4.65419   1
  -7   5  -2 11.5122 3.05387   1
   7   5   2 5.48046 4.88034   4
  -8  -5  -2 49.7018 8.83631   1
   8  -5   2 49.6145 7.73198   1
  -8  -5  -2 45.6540 8.85474   2
  -8   5  -2 47.7234 5.12499   1
  -8   5  -2 50.1870 7.82526   4
   8   5   2 43.6123 8.24720   4
   8   5   2 50.5774 7.82803   1
  -9  -5  -2 68.5997 10.5465   2
   9  -5   2 76.2488 10.1065   1
  -9  -5  -2 59.9592 9.90565   1
   9   5   2 67.3354 9.18905   1
  -9   5  -2 60.1202 8.71360   4
  -9   5  -2 69.9721 6.75583   1
   9   5   2 74.7490 10.3464   4
 -10  -5  -2 22.0822 7.99240   2
 -10  -5  -2 7.79648 5.44118   1
  10   5   2 21.6875 7.09894   4
  10   5   2 12.4117 6.03389   1
 -10   5  -2 13.1459 4.14253   1
 -10   5  -2 14.7573 6.12005   4
 -11  -5  -2 256.954 19.3493   2
 -11  -5  -2 252.307 17.1980   1
  11   5   2 240.628 16.3608   1
  11   5   2 239.969 16.6223   4
 -11   5  -2 262.970 11.8651   1
 -12  -5  -2 32.1914 9.40073   2
 -12  -5  -2 12.5303 6.55678   1
  12   5   2 23.4046 8.21178   1
 -12   5  -2 50.8005 6.91958   1
  12   5   2 31.7506 8.82621   4
 -13  -5  -2 157.372 16.3515   1
 -13  -5  -2 145.150 18.1615   2
 -13   5  -2 186.006 11.3426   1
  13   5   2 183.452 18.2578   4
  13   5   2 162.126 17.5958   1
 -13  -6   2 121.807 16.4973   1
 -13  -6   2 165.895 19.1961   2
  13  -6  -2 121.213 14.8762   1
  13   6  -2 119.446 13.7823   1
  13   6  -2 110.884 15.3509   4
  12  -6  -2 62.2949 12.1761   1
 -12  -6   2 60.8196 12.0761   1
 -12  -6   2 81.6832 13.4976   2
  12   6  -2 48.2397 8.98327   1
 -12   6   2 79.2447 13.0079   4
  12   6  -2 58.5590 11.3377   4
 -11  -6   2 62.0598 10.2560   1
  11  -6  -2 78.4465 11.9399   1
 -11  -6   2 85.3986 12.9248   2
  11   6  -2 96.2619 11.7693   1
 -11   6   2 74.8223 11.5521   4
  11   6  -2 80.6212 11.9460   4
  10  -6  -2 445.775 21.1441   1
 -10  -6   2 418.501 22.0863   2
 -10  -6   2 409.169 20.8276   1
  10   6  -2 411.268 18.3052   1
 -10   6   2 486.363 22.3440   4
  10   6  -2 409.077 20.6807   4
  -9  -6   2 84.6820 11.2612   2
  -9  -6   2 67.1795 9.66723   1
   9  -6  -2 72.1193 9.85106   1
   9   6  -2 77.7891 10.4203   4
  -9   6   2 68.3421 10.5116   4
   9   6  -2 85.5996 9.65856   1
  -8  -6   2 639.488 24.3275   2
  -8  -6   2 652.345 23.7787   1
   8  -6  -2 662.138 23.4955   1
   8   6  -2 668.925 20.9098   1
   8   6  -2 643.531 23.4012   4
  -8   6   2 641.843 23.9706   4
  -7  -6   2 463.860 19.2153   1
  -7  -6   2 478.243 19.4776   2
   7  -6  -2 445.407 18.5317   1
   7   6  -2 471.653 16.6536   1
  -7   6   2 484.806 19.7515   4
   7   6  -2 500.667 19.5592   4
  -6  -6   2 265.205 13.8482   1
  -6  -6   2 270.455 13.6956   2
   6  -6  -2 265.652 13.9828   1
   6   6  -2 271.414 13.9703   4
   6   6  -2 254.810 11.4467   1
  -6   6   2 243.613 13.9390   4
   5  -6  -2 100.528 9.73292   1
  -5  -6   2 116.349 9.25614   1
  -5  -6   2 124.304 9.03386   2
  -5   6   2 105.348 9.96926   4
   5   6  -2 107.528 7.49558   1
   5   6  -2 105.108 9.61516   4
  -4  -6   2 136.575 8.47828   2
  -4  -6   2 134.702 9.05184   1
   4  -6  -2 144.364 9.84115   1
  -4   6   2 128.627 9.82233   4
   4   6  -2 128.318 7.15275   1
   4   6  -2 112.406 8.71691   4
  -3  -6   2 45.6592 5.35192   2
   3  -6  -2 45.4351 6.38502   1
   3  -6  -2 51.1707 6.25442   2
  -3  -6   2 52.7318 6.78881   1
   3   6  -2 54.3988 6.40470   4
  -3   6   2 40.6572 6.10651   4
   3   6  -2 44.5345 4.45859   1
  -2  -6   2 137.674 6.69733   2
   2  -6  -2 133.845 8.08636   2
   2  -6  -2 136.936 8.92974   1
  -2  -6   2 147.483 8.16566   1
  -2   6   2 144.263 9.48828   4
   2   6  -2 135.017 8.15748   4
   1  -6  -2 53.5469 7.05603   1
  -1  -6   2 69.5292 6.23887   1
  -1  -6   2 47.4642 3.83751   2
   1  -6  -2 57.5376 6.19704   2
  -1   6   2 64.3572 7.66036   4
   1   6  -2 54.6934 5.87460   4
   0  -6  -2 72.8879 7.11443   2
   0  -6   2 77.5946 3.82722   2
   0  -6   2 73.3342 5.68667   1
   0  -6  -2 76.3829 8.15407   1
   0   6  -2 76.0432 6.49688   4
   0   6   2 75.4095 7.80646   4
   1  -6   2 3.00401 2.31574   1
  -1  -6  -2 1.01739 2.72637   1
  -1  -6  -2 1.55528 2.68444   2
  -1   6  -2 -0.3773 2.65495   4
   1   6   2 3.34934 2.74011   1
   1   6   2 1.08886 3.40118   4
  -2  -6  -2 151.525 9.08327   2
  -2  -6  -2 134.296 9.17215   1
   2  -6   2 141.936 7.47580   1
  -2   6  -2 138.852 7.88958   4
   2   6   2 143.301 8.75009   1
   2   6   2 140.153 9.54552   4
   3  -6   2 5.85714 2.95321   1
  -3  -6  -2 2.61055 3.42097   2
  -3  -6  -2 5.47396 3.53586   1
   3   6   2 13.5814 4.50740   4
   3   6   2 2.94072 3.02851   1
  -3   6  -2 7.15531 3.33525   4
  -4  -6  -2 71.9755 8.73386   1
  -4  -6  -2 75.2909 8.68686   2
   4  -6   2 72.4718 6.99195   1
  -4   6  -2 53.5707 6.52853   4
   4   6   2 78.5363 8.83217   1
   4   6   2 65.1584 8.23165   4
   5  -6   2 21.0132 4.85305   1
  -5  -6  -2 10.6990 4.84039   2
  -5  -6  -2 23.4073 5.84885   1
   5   6   2 12.4737 4.31398   1
   5   6   2 14.1191 5.09518   4
  -5   6  -2 13.7657 4.37168   4
   6  -6   2 83.6487 8.68920   1
  -6  -6  -2 95.7682 10.6480   1
  -6  -6  -2 63.1215 9.10168   2
   6   6   2 70.5057 9.04512   4
   6   6   2 85.0021 10.0088   1
  -6   6  -2 69.4413 8.02551   4
  -7  -6  -2 171.384 13.0823   2
  -7  -6  -2 173.280 12.9880   1
   7  -6   2 155.915 11.1606   1
   7   6   2 176.062 12.7897   4
  -7   6  -2 177.892 11.8486   4
   7   6   2 178.635 12.3179   1
  -8  -6  -2 535.046 22.1879   1
  -8  -6  -2 539.102 23.1287   2
   8   6   2 552.045 22.1313   4
   8   6   2 527.429 20.8647   1
  -8   6  -2 551.747 20.7660   4
  -9  -6  -2 -6.2841 4.84846   2
  -9  -6  -2 -0.3906 5.13810   1
   9   6   2 7.92852 5.54153   4
   9   6   2 7.62953 5.13561   1
  -9   6  -2 4.81787 4.61551   4
 -10  -6  -2 83.0011 12.4349   2
 -10  -6  -2 56.8287 9.89512   1
 -10   6  -2 67.1730 9.86074   4
  10   6   2 73.0433 10.8458   1
  10   6   2 65.9608 10.9927   4
 -11  -6  -2 5.08026 6.65470   1
 -11  -6  -2 11.3428 7.31492   2
  11   6   2 7.06660 6.26067   1
 -11   6  -2 5.84298 5.82696   4
  11   6   2 9.82421 6.91231   4
 -12  -6  -2 97.7788 13.8126   1
 -12  -6  -2 105.809 14.9457   2
  12   6   2 98.8770 12.8666   1
  12   6   2 84.2287 13.5457   4
 -12  -7   2 342.214 22.8306   2
 -12  -7   2 362.890 22.2204   1
  12  -7  -2 352.572 21.8017   1
  12   7  -2 339.691 18.4787   1
 -12   7   2 340.796 21.7919   4
  12   7  -2 361.718 22.3983   4
 -11  -7   2 -3.5278 5.23763   2
  11  -7  -2 5.21532 6.03711   1
 -11  -7   2 2.37411 6.35084   1
  11   7  -2 -6.5739 5.38630   4
 -11   7   2 -1.3161 5.56186   4
  11   7  -2 4.82074 5.07719   1
 -10  -7   2 0.51317 5.53589   2
 -10  -7   2 -2.0139 4.80499   1
  10  -7  -2 10.4313 6.16297   1
  10   7  -2 -3.0761 5.17649   4
 -10   7   2 16.4708 7.15964   4
  10   7  -2 -6.0567 3.88894   1
  -9  -7   2 35.4958 8.24597   1
  -9  -7   2 57.3038 9.96048   2
   9  -7  -2 51.1855 9.29120   1
   9   7  -2 44.1856 9.07573   4
  -9   7   2 42.0902 9.12210   4
   9   7  -2 34.8610 6.89721   1
  -8  -7   2 11.8068 6.13734   1
  -8  -7   2 22.7814 7.10546   2
   8  -7  -2 20.8940 6.80614   1
  -8   7   2 -0.0468 5.37574   4
   8   7  -2 17.5335 6.23564   4
   8   7  -2 18.4970 5.01037   1
  -7  -7   2 23.9033 6.64464   1
   7  -7  -2 31.2330 7.30515   1
  -7  -7   2 34.7466 7.13174   2
   7   7  -2 31.0374 5.84934   1
  -7   7   2 18.7103 6.50723   4
   7   7  -2 18.1047 6.22167   4
  -6  -7   2 9.23551 5.36911   1
   6  -7  -2 14.0998 5.82366   1
  -6  -7   2 6.27691 4.45481   2
   6   7  -2 6.68868 3.81064   1
  -6   7   2 10.1001 5.25012   4
   6   7  -2 9.33008 4.83024   4
  -5  -7   2 79.4934 8.88571   2
  -5  -7   2 68.5130 8.45660   1
   5  -7  -2 84.4037 9.43610   1
   5   7  -2 71.9006 6.94250   1
   5   7  -2 92.4544 9.68292   4
  -5   7   2 73.4992 9.22103   4
  -4  -7   2 91.2872 9.74000   1
  -4  -7   2 95.7190 8.77155   2
   4  -7  -2 88.3981 9.67089   1
  -4   7   2 75.3895 8.89098   4
   4   7  -2 81.6160 6.24607   1
   4   7  -2 75.7665 8.69762   4
  -3  -7   2 2.06862 2.72111   2
  -3  -7   2 -0.9154 3.27218   1
   3  -7  -2 -0.3183 3.15817   1
   3  -7  -2 -1.6561 2.89375   2
   3   7  -2 -3.4151 3.00887   4
  -3   7   2 -2.9866 3.63577   4
   2  -7  -2 288.631 12.2702   2
  -2  -7   2 315.364 10.4098   2
   2  -7  -2 296.704 13.7508   1
  -2  -7   2 301.002 12.4874   1
  -2   7   2 334.173 14.7277   4
   2   7  -2 312.249 13.0537   4
  -1  -7   2 452.698 11.2978   2
   1  -7  -2 459.985 15.2478   2
  -1  -7   2 444.291 14.5032   1
   1  -7  -2 404.613 15.9071   1
   1   7  -2 427.915 14.7454   4
  -1   7   2 403.056 16.2885   4
   0  -7   2 166.044 8.97472   1
   0  -7  -2 159.194 10.4305   1
   0  -7   2 181.106 6.21582   2
   0  -7  -2 153.695 9.09474   2
   0   7  -2 189.376 9.98254   4
   0   7   2 166.909 10.8451   4
  -1  -7  -2 594.758 19.4823   1
  -1  -7  -2 580.318 17.8676   2
   1  -7   2 602.242 16.5571   1
   1   7   2 594.752 19.7291   4
  -1   7  -2 608.211 17.3012   4
   2  -7   2 998.605 22.4079   1
  -2  -7  -2 983.140 24.6537   2
  -2  -7  -2 959.051 25.8072   1
   2   7   2 1002.88 24.6556   1
   2   7   2 942.337 25.8076   4
  -2   7  -2 981.191 23.1973   4
   3  -7   2 16.0949 4.47274   1
  -3  -7  -2 8.97311 4.72486   1
  -3  -7  -2 5.74774 4.06667   2
  -3   7  -2 13.4687 4.44966   4
   3   7   2 19.7533 4.87711   1
   3   7   2 12.3653 5.11247   4
  -4  -7  -2 334.862 15.8479   1
  -4  -7  -2 333.126 15.4760   2
   4  -7   2 341.835 13.3691   1
  -4   7  -2 328.547 13.8305   4
   4   7   2 363.232 15.1092   1
   4   7   2 344.008 16.1311   4
  -5  -7  -2 112.151 11.5408   2
  -5  -7  -2 112.087 12.3074   1
   5  -7   2 93.5380 10.0931   1
   5   7   2 100.451 9.96623   1
   5   7   2 93.0793 10.6870   4
  -5   7  -2 108.705 9.96027   4
  -6  -7  -2 65.7030 10.0709   1
  -6  -7  -2 68.5546 9.76214   2
   6   7   2 45.5142 7.52733   1
   6   7   2 70.3206 9.68984   4
  -6   7  -2 61.8789 8.51087   4
  -7  -7  -2 137.569 13.5878   2
  -7  -7  -2 118.320 11.7945   1
  -7   7  -2 159.171 11.7871   4
   7   7   2 138.892 13.3744   4
   7   7   2 132.648 11.9982   1
  -8  -7  -2 126.381 14.6365   1
  -8  -7  -2 174.110 16.6929   2
   8   7   2 158.690 12.3620   1
   8   7   2 137.374 13.7601   4
  -8   7  -2 152.719 13.4449   4
  -9  -7  -2 13.1562 6.87349   2
  -9  -7  -2 11.7757 6.21564   1
   9   7   2 17.6484 6.61507   1
  -9   7  -2 2.97789 4.87692   4
   9   7   2 1.65502 5.32373   4
 -10  -7  -2 -0.9209 4.59561   1
 -10  -7  -2 -2.0916 5.55086   2
  10   7   2 -8.5140 4.90931   4
 -10   7  -2 13.7847 6.50728   4
  10   7   2 -1.1542 4.95463   1
 -11  -7  -2 7.55355 6.65890   2
 -11  -7  -2 -0.5174 5.43270   1
  11   7   2 2.55621 5.14017   1
  11   7   2 11.4639 7.06595   4
 -11   7  -2 7.66676 5.89143   4
 -12  -7  -2 95.6306 13.2217   1
 -12  -7  -2 165.804 19.0211   2
 -12   7  -2 108.354 14.6461   4
  12   7   2 119.643 14.1224   1
  12   7   2 136.720 16.5351   4
 -11  -8   2 65.7144 12.4565   1
 -11  -8   2 57.9967 11.4892   2
  11  -8  -2 43.1492 10.1296   1
 -11   8   2 67.5807 11.9383   4
  11   8  -2 56.7907 9.13385   1
  11   8  -2 51.8050 10.6177   4
  10  -8  -2 179.620 18.4693   1
 -10  -8   2 178.833 17.7427   2
 -10  -8   2 141.628 16.4133   1
  10   8  -2 169.772 12.2073   1
  10   8  -2 107.893 13.5440   4
 -10   8   2 161.177 16.3798   4
   9  -8  -2 116.397 13.2497   1
  -9  -8   2 103.838 13.0689   2
  -9  -8   2 127.213 14.1749   1
  -9   8   2 124.750 14.4809   4
   9   8  -2 105.862 10.8677   1
   9   8  -2 95.9866 12.7488   4
  -8  -8   2 91.1571 11.9057   2
  -8  -8   2 92.8080 12.4019   1
   8  -8  -2 107.577 12.6575   1
  -8   8   2 95.4799 11.9253   4
   8   8  -2 112.821 13.1253   4
   8   8  -2 99.1572 9.83235   1
  -7  -8   2 462.471 20.8344   1
  -7  -8   2 459.794 19.7910   2
   7  -8  -2 471.352 20.9293   1
   7   8  -2 482.266 16.6890   1
  -7   8   2 428.169 20.4798   4
   7   8  -2 448.547 20.5052   4
  -6  -8   2 361.943 17.9284   1
  -6  -8   2 338.476 15.7797   2
   6  -8  -2 348.262 17.3795   1
   6   8  -2 346.233 17.3584   4
   6   8  -2 359.030 13.6441   1
  -6   8   2 345.347 18.0408   4
  -5  -8   2 30.1270 5.96487   2
  -5  -8   2 41.1041 7.81198   1
   5  -8  -2 48.2435 8.28305   1
   5   8  -2 33.3951 7.22231   4
   5   8  -2 39.3408 5.62853   1
  -5   8   2 29.6375 7.21260   4
  -4  -8   2 229.223 11.2758   2
  -4  -8   2 217.972 12.6730   1
   4  -8  -2 219.201 13.5289   1
   4   8  -2 218.415 13.1475   4
  -4   8   2 206.559 13.8684   4
   3  -8  -2 22.5508 5.02951   2
  -3  -8   2 24.6600 5.86072   1
  -3  -8   2 31.0162 5.03217   2
   3  -8  -2 12.3358 5.05550   1
   3   8  -2 23.9762 5.75682   4
  -3   8   2 13.4960 5.43754   4
  -2  -8   2 207.157 8.91351   2
   2  -8  -2 209.016 12.7569   1
   2  -8  -2 193.602 10.7197   2
  -2  -8   2 208.178 11.5362   1
   2   8  -2 190.674 11.5301   4
  -2   8   2 200.853 13.0315   4
   1  -8  -2 2.00206 4.12483   1
   1  -8  -2 1.06615 2.85118   2
  -1  -8   2 -0.5362 2.16497   2
  -1  -8   2 -0.8168 3.24773   1
  -1   8   2 -2.6705 3.69842   4
   1   8  -2 2.88045 3.68476   4
   0  -8   2 20.0273 3.03519   2
   0  -8  -2 28.5788 5.62842   2
   0  -8   2 14.0123 4.38663   1
   0  -8  -2 24.9361 5.85658   1
   0   8  -2 13.4813 4.72904   4
   0   8   2 13.7564 5.10911   4
  -1  -8  -2 24.9071 5.49276   2
  -1  -8  -2 18.1205 6.19056   1
   1  -8   2 25.0406 5.15554   1
   1   8   2 24.9282 6.21140   4
  -1   8  -2 28.5696 5.89871   4
  -2  -8  -2 269.681 13.2986   2
  -2  -8  -2 225.750 13.4768   1
   2   8   2 252.459 12.8353   1
   2   8   2 226.331 13.5952   4
  -2   8  -2 258.150 12.7395   4
  -3  -8  -2 278.490 14.0115   2
  -3  -8  -2 277.524 15.0529   1
   3   8   2 301.880 14.1932   1
   3   8   2 314.136 16.3136   4
  -3   8  -2 278.136 13.4786   4
  -4  -8  -2 -3.2611 3.39091   2
  -4  -8  -2 1.05741 4.02084   1
   4   8   2 -7.8237 3.87508   4
   4   8   2 3.88159 3.75474   1
  -4   8  -2 -2.3319 3.74565   4
  -5  -8  -2 67.3293 9.40730   1
  -5  -8  -2 74.8817 9.61483   2
   5   8   2 57.6774 9.05054   4
  -5   8  -2 69.1936 8.81456   4
   5   8   2 66.6917 8.79468   1
  -6  -8  -2 49.9070 9.46754   1
  -6  -8  -2 50.9942 8.91901   2
   6   8   2 55.1636 8.32188   1
   6   8   2 53.8173 9.17153   4
  -6   8  -2 63.8531 8.70973   4
  -7  -8  -2 340.676 18.6077   2
  -7  -8  -2 322.358 18.3935   1
   7   8   2 330.400 16.7738   1
  -7   8  -2 346.384 17.0929   4
   7   8   2 347.069 18.6897   4
  -8  -8  -2 68.9223 11.2431   2
  -8  -8  -2 66.6028 9.97192   1
   8   8   2 51.0051 10.0402   4
   8   8   2 48.8423 8.45013   1
  -8   8  -2 81.9883 10.8310   4
  -9  -8  -2 11.1200 7.24719   1
  -9  -8  -2 7.11966 6.46380   2
   9   8   2 4.78357 5.90151   4
   9   8   2 10.9949 5.82055   1
  -9   8  -2 1.92965 5.06650   4
 -10  -8  -2 27.0385 8.96714   1
 -10  -8  -2 16.7495 7.52176   2
  10   8   2 16.4881 7.67159   4
  10   8   2 12.5681 6.00087   1
 -10   8  -2 15.3096 6.69053   4
 -11  -8  -2 28.8075 9.15448   1
 -11  -8  -2 59.7182 12.5363   2
  11   8   2 54.3244 11.3210   4
 -11   8  -2 47.8470 10.1374   4
  11   8   2 44.5313 9.73868   1
 -10  -9   2 -7.5325 5.56605   1
 -10  -9   2 3.44223 6.46442   2
  10   9  -2 -2.1092 3.85449   1
  10   9  -2 -5.9310 5.64268   4
 -10   9   2 -2.0975 5.83410   4
  -9  -9   2 -0.8845 5.02051   2
   9  -9  -2 8.66701 7.52463   1
   9   9  -2 11.5854 6.99796   4
   9   9  -2 2.68586 4.41891   1
  -9   9   2 -6.4428 5.26317   4
   8  -9  -2 8.97003 6.43431   1
  -8  -9   2 2.18706 5.13106   2
   8   9  -2 8.10069 5.91251   4
  -8   9   2 4.60319 6.04689   4
   8   9  -2 5.86351 4.40152   1
  -7  -9   2 105.472 12.0263   2
   7  -9  -2 96.2596 12.1742   1
  -7   9   2 109.682 13.1136   4
   7   9  -2 115.969 9.01513   1
   7   9  -2 106.401 12.6847   4
  -6  -9   2 2.26909 3.79262   2
   6  -9  -2 3.42052 4.59327   1
  -6   9   2 0.75715 4.85297   4
   6   9  -2 1.93181 3.51982   1
   6   9  -2 1.12571 4.59414   4
   5  -9  -2 -3.9943 4.18991   1
  -5  -9   2 -3.5093 3.45457   2
  -5   9   2 -3.1431 4.22075   4
   5   9  -2 0.40761 4.38139   4
   4  -9  -2 23.3357 6.45403   1
  -4  -9   2 31.9145 5.83528   2
  -4   9   2 23.7819 6.80731   4
   4   9  -2 30.1973 7.04248   4
  -3  -9   2 91.2972 8.22899   2
   3  -9  -2 90.7873 11.8753   1
  -3   9   2 76.3192 10.1753   4
   3   9  -2 68.8029 8.97539   4
   2  -9  -2 1155.06 31.6696   1
  -2  -9   2 1209.82 24.2570   2
   2  -9  -2 1172.31 28.1470   2
   2   9  -2 1198.14 30.5358   4
  -2   9   2 1180.81 32.5951   4
   1  -9  -2 23.6775 7.10343   1
   1  -9  -2 41.6399 6.51448   2
   1   9  -2 28.0627 6.49803   4
  -1   9   2 33.0346 7.44990   4
   0  -9  -2 4.27521 3.70541   2
   0  -9  -2 4.67736 4.69111   1
   0   9  -2 5.25161 4.53532   4
   0   9   2 2.19112 4.82757   4
  -1  -9  -2 61.3222 9.00394   1
  -1  -9  -2 72.2320 8.35939   2
   1   9   2 75.5855 10.4541   4
  -1   9  -2 63.5380 8.44703   4
  -2  -9  -2 975.911 26.5536   2
  -2  -9  -2 994.693 29.3231   1
  -2   9  -2 963.526 26.6790   4
   2   9   2 906.962 28.6902   4
  -3  -9  -2 113.653 11.3108   2
  -3  -9  -2 129.779 14.0314   1
  -3   9  -2 147.638 12.3206   4
   3   9   2 110.081 10.6592   1
   3   9   2 146.315 13.4468   4
  -4  -9  -2 44.8204 7.69864   2
  -4  -9  -2 58.3936 10.1555   1
  -4   9  -2 42.2422 7.59647   4
   4   9   2 37.7130 8.52658   4
   4   9   2 33.3299 6.76642   1
  -5  -9  -2 2.02654 4.36070   1
  -5  -9  -2 -0.9800 3.88902   2
   5   9   2 1.99697 5.21838   4
   5   9   2 5.04116 4.20988   1
  -5   9  -2 5.42935 4.51738   4
  -6  -9  -2 16.3467 6.56654   2
  -6  -9  -2 6.49262 5.58904   1
   6   9   2 13.9430 6.35995   4
  -6   9  -2 7.96368 5.29221   4
   6   9   2 10.7960 5.21184   1
  -7  -9  -2 20.4521 7.45511   2
  -7  -9  -2 24.9744 8.87606   1
  -7   9  -2 22.4355 6.91492   4
   7   9   2 6.90555 5.95865   4
   7   9   2 14.7627 5.60837   1
  -8  -9  -2 4.33514 5.27557   1
  -8  -9  -2 -3.0236 5.12123   2
   8   9   2 3.55518 6.30196   4
   8   9   2 -1.2966 4.83477   1
  -8   9  -2 10.8770 5.69446   4
  -9  -9  -2 4.84209 6.68500   2
  -9  -9  -2 7.11574 5.63127   1
  -9   9  -2 0.07192 5.57649   4
   9   9   2 5.21262 5.31176   1
   9   9   2 3.34582 6.55856   4
 -10  -9  -2 8.74469 6.94725   1
 -10  -9  -2 15.8381 8.24350   2
  10   9   2 8.45230 7.59765   4
 -10   9  -2 13.6690 6.51329   4
  10   9   2 12.5132 6.13915   1
  -9 -10   2 35.3402 9.09743   2
   9  10  -2 15.3384 8.26283   4
   9  10  -2 25.3747 5.92918   1
  -9  10   2 22.0416 8.76705   4
  -8 -10   2 28.1710 7.56864   2
  -8  10   2 33.7380 8.97846   4
   8  10  -2 20.8784 5.37287   1
   8  10  -2 19.3423 7.90447   4
  -7 -10   2 131.045 13.3426   2
  -7  10   2 140.116 15.4421   4
   7  10  -2 101.182 13.2881   4
   6 -10  -2 84.8603 13.6882   1
  -6 -10   2 90.3792 10.4774   2
   6  10  -2 103.394 12.6280   4
  -6  10   2 94.6627 12.5471   4
   5 -10  -2 189.800 15.0960   1
  -5 -10   2 238.307 13.4960   2
   5  10  -2 214.675 15.2562   4
  -5  10   2 253.282 16.8319   4
   4 -10  -2 29.9316 8.45756   1
   4  10  -2 39.4194 8.20415   4
  -4  10   2 32.4013 8.14313   4
   3 -10  -2 24.4770 7.23861   1
   3  10  -2 21.0058 6.30794   4
  -3  10   2 34.7943 8.25248   4
   2 -10  -2 16.6733 5.47720   2
   2 -10  -2 14.2302 5.60934   1
   2  10  -2 11.7397 5.50211   4
  -2  10   2 34.9522 7.92474   4
   1 -10  -2 229.515 12.4771   2
   1 -10  -2 223.037 14.7382   1
  -1  10   2 200.194 14.8889   4
   1  10  -2 243.796 14.3500   4
   0 -10  -2 -4.6418 3.11287   2
   0 -10  -2 -0.5337 4.22621   1
   0  10   2 -1.1783 4.64133   4
   0  10  -2 -0.0700 4.13743   4
  -1 -10  -2 462.079 18.0076   2
  -1 -10  -2 452.385 20.6119   1
   1  10   2 476.190 21.4060   4
  -1  10  -2 450.062 18.8935   4
  -2 -10  -2 0.31851 4.52577   1
  -2 -10  -2 4.85131 4.58140   2
   2  10   2 7.14604 5.63262   4
  -2  10  -2 -3.3363 3.67242   4
  -3 -10  -2 26.4256 6.58364   2
  -3 -10  -2 26.8410 7.63738   1
   3  10   2 23.4587 7.68255   4
  -3  10  -2 8.24464 5.02121   4
  -4 -10  -2 -2.5471 3.91854   1
  -4 -10  -2 -7.4683 3.58859   2
   4  10   2 9.50331 6.21966   4
   4  10   2 6.92654 4.73602   1
  -4  10  -2 -2.1469 4.02762   4
  -5 -10  -2 112.530 13.4547   1
  -5 -10  -2 108.287 12.3076   2
   5  10   2 108.259 13.2680   4
   5  10   2 105.717 11.5149   1
  -5  10  -2 87.0572 10.7182   4
  -6 -10  -2 14.8089 6.58700   2
  -6 -10  -2 18.6595 6.95669   1
   6  10   2 5.79805 4.75529   1
   6  10   2 9.63123 6.65544   4
  -6  10  -2 3.29549 4.75621   4
  -7 -10  -2 88.4338 11.9619   1
  -7 -10  -2 147.115 15.3108   2
  -7  10  -2 139.534 14.3430   4
   7  10   2 128.268 13.3592   1
   7  10   2 132.684 15.3336   4
  -8 -10  -2 -5.7020 5.27355   2
  -8 -10  -2 -0.7843 6.45971   1
  -8  10  -2 -2.8591 4.61096   4
   8  10   2 6.02040 5.28784   1
   8  10   2 -1.4227 5.94737   4
  -9 -10  -2 0.05721 6.47791   2
  -9 -10  -2 18.5006 8.82220   1
   9  10   2 8.92990 7.13306   4
   9  10   2 3.71732 4.97417   1
  -9  10  -2 6.44574 6.68037   4
   7  11  -2 1.58481 5.95815   4
  -7  11   2 0.54406 6.14639   4
  -6  11   2 5.94655 6.78951   4
   6  11  -2 4.64714 6.12447   4
   5  11  -2 -0.6331 5.07255   4
  -5  11   2 -5.7606 4.19966   4
  -4  11   2 231.161 17.2948   4
   4  11  -2 243.853 16.4466   4
  -3  11   2 151.824 15.5779   4
   3  11  -2 158.124 15.0447   4
   2 -11  -2 -1.2679 5.09036   1
   2  11  -2 9.47857 5.58919   4
  -2  11   2 -0.5339 4.94664   4
   1 -11  -2 238.408 16.3280   1
   1 -11  -2 272.880 19.9771   2
   1  11  -2 237.577 15.3632   4
  -1  11   2 217.573 16.3090   4
   0 -11  -2 -2.5173 4.47739   1
   0 -11  -2 4.25018 4.41992   2
   0  11  -2 1.94592 4.87973   4
   0  11   2 -3.2084 4.95682   4
  -1 -11  -2 13.7040 5.32203   2
  -1 -11  -2 26.7041 7.14262   1
  -1  11  -2 17.2132 6.30100   4
   1  11   2 25.4169 8.31949   4
  -2 -11  -2 57.1348 8.70873   2
  -2 -11  -2 43.5139 8.88431   1
   2  11   2 37.3787 9.23571   4
  -2  11  -2 39.4515 8.49375   4
  -3 -11  -2 121.101 13.4343   1
  -3 -11  -2 136.763 13.2161   2
  -3  11  -2 128.926 13.0086   4
   3  11   2 131.095 14.4069   4
  -4 -11  -2 97.1326 11.4909   2
  -4 -11  -2 80.5417 11.4516   1
  -4  11  -2 88.1511 11.2322   4
   4  11   2 130.825 15.4264   4
  -5 -11  -2 19.3653 6.84054   2
  -5 -11  -2 9.59666 5.92460   1
  -5  11  -2 21.4285 6.29716   4
   5  11   2 25.4751 8.41143   4
  -6 -11  -2 18.2864 8.13203   1
  -6 -11  -2 11.0365 6.17550   2
  -6  11  -2 15.0746 6.75129   4
   6  11   2 6.79809 7.12339   4
   6  11   2 12.4471 5.85250   1
  -7 -11  -2 30.5465 8.69523   2
  -7 -11  -2 22.9699 7.75062   1
  -7  11  -2 45.5486 9.28073   4
   7  11   2 45.8449 11.3472   4
   7  11   2 22.2002 6.91195   1
   5  12  -2 81.4242 12.3606   4
  -5  12   2 89.1665 13.2505   4
  -4  12   2 185.577 17.8784   4
   4  12  -2 191.257 17.7187   4
   3  12  -2 -2.2441 5.30957   4
  -3  12   2 -6.7354 4.95412   4
  -2  12   2 3.74862 5.94698   4
   2  12  -2 7.99437 6.50300   4
  -1  12   2 -5.6370 5.03798   4
   1  12  -2 13.9222 6.70110   4
   0  12   2 29.7598 8.96547   4
   0  12  -2 39.0643 8.74220   4
  -1  12  -2 8.61296 5.89824   4
   1  12   2 2.18215 6.39261   4
  -2  12  -2 8.30661 5.20282   4
   2  12   2 15.5308 7.63711   4
   3  12   2 13.5401 7.47341   4
  -3  12  -2 13.3302 6.57090   4
  -4 -12  -2 13.3666 6.97345   1
  -4  12  -2 22.7445 7.55071   4
   4  12   2 19.2786 7.79335   4
  -5 -12  -2 28.1678 8.08670   1
  -5 -12  -2 25.0450 11.9242   2
   5  12   2 16.3526 8.40078   4
  -5  12  -2 20.9377 6.98379   4
   0  13  -2 422.599 22.4342   4
   0  13   2 387.486 23.2619   4
  14   0  -3 5.06406 5.92614   1
  13   0  -3 132.211 15.0528   1
  12   0  -3 2.21821 5.02321   1
  11   0  -3 73.5860 8.88561   3
  11   0  -3 51.4082 9.46804   1
  10   0  -3 0.56266 4.61239   1
   9   0  -3 12.2743 5.14830   1
   8   0  -3 -0.2065 3.15799   1
   7   0  -3 5.96473 3.68486   1
   6   0  -3 0.31006 2.82712   1
   5   0  -3 2828.20 44.1702   1
   4   0  -3 -2.2413 2.13414   1
   3   0  -3 1071.17 18.9662   1
   2   0  -3 -1.4719 2.46741   3
   2   0  -3 -0.4830 1.69809   1
   1   0  -3 2796.55 39.8842   3
   1   0  -3 2731.71 38.3233   2
   1   0  -3 2637.40 34.0483   1
   1   0  -3 2690.26 34.1336   1
   0   0  -3 2.21577 1.34687   4
   0   0  -3 -0.1851 1.80909   2
   0   0  -3 1.12167 2.41575   3
  -1   0  -3 1677.35 25.8941   2
  -1   0  -3 1654.18 23.9949   4
  -1   0  -3 1714.12 26.6173   3
  -2   0  -3 -1.3243 1.20872   1
  -2   0  -3 -1.3598 1.29063   1
  -2   0  -3 -0.5304 2.17060   2
   3   0   3 1216.34 19.7695   4
   3   0   3 1192.17 20.1147   1
  -3   0  -3 1243.04 23.1523   2
  -3   0  -3 1204.08 18.6513   1
  -3   0  -3 1228.99 19.0297   1
   4   0   3 -1.0429 1.81921   4
  -4   0  -3 -1.1264 2.58305   2
  -4   0  -3 -2.2186 1.93354   1
   4   0   3 0.83414 2.14312   1
  -5   0  -3 411.674 11.7208   1
  -5   0  -3 427.957 14.6074   2
   5   0   3 411.014 11.9534   4
   5   0   3 427.837 12.6436   1
   6   0   3 -0.7085 2.64036   1
  -6   0  -3 -1.7130 2.85593   2
  -6   0  -3 0.84057 2.61291   1
   6   0   3 -0.0208 2.41984   4
  -7   0  -3 101.320 7.66661   1
   7   0   3 85.5371 7.59703   4
   7   0   3 101.032 8.10210   1
  -7   0  -3 71.5633 8.67135   2
  -8   0  -3 0.37079 4.48748   2
  -8   0  -3 3.27299 3.83871   1
   8   0   3 0.58774 3.35066   1
   8   0   3 -2.6745 2.83273   4
   9   0   3 443.964 17.9779   1
   9   0   3 454.650 17.0216   4
  -9   0  -3 490.284 21.0466   2
  -9   0  -3 453.723 16.9585   1
 -10   0  -3 3.51839 4.69601   1
  10   0   3 2.56747 4.19203   4
 -10   0  -3 -0.8287 5.08571   2
  10   0   3 0.33514 4.14568   1
 -11   0  -3 383.318 21.0518   2
 -11   0  -3 395.124 17.5642   1
  11   0   3 370.216 18.6539   1
  12   0   3 1.43584 5.10689   1
 -12   0  -3 -3.7497 4.27886   1
 -12   0  -3 0.01550 5.28055   2
 -13   0  -3 260.471 19.5635   2
 -13   0  -3 232.223 15.0076   1
  13   0   3 237.873 17.4841   1
 -14   0  -3 -0.5721 4.82146   1
  14   0   3 -3.2925 5.44019   1
 -14   0  -3 -7.2052 5.57828   2
  14  -1  -3 46.9403 9.67464   1
  14   1  -3 41.4969 9.99413   1
  14   1  -3 54.1468 11.2223   4
  13  -1  -3 -0.0982 5.59355   1
  13   1  -3 -3.1120 4.29354   1
  12  -1  -3 22.0051 7.46682   1
  12   1  -3 11.1735 6.20036   1
  11  -1  -3 38.0201 7.62785   1
  11   1  -3 52.5456 8.62896   1
  11   1  -3 34.5691 6.09969   3
  10  -1  -3 141.050 13.5586   1
  10   1  -3 115.288 11.8743   1
  10   1  -3 128.102 8.84976   3
   9  -1  -3 5.01576 4.42159   1
   9   1  -3 0.33225 3.95000   1
   9   1  -3 1.31250 3.32618   3
   8  -1  -3 220.159 12.1140   1
   8   1  -3 200.971 11.4428   1
   8   1  -3 175.202 9.31096   3
   7  -1  -3 219.743 11.3179   1
   7   1  -3 225.650 9.76671   3
   7   1  -3 208.544 10.6485   1
   6  -1  -3 20.1311 4.47676   1
   6   1  -3 20.3159 4.43420   1
   6   1  -3 18.6235 3.73643   3
   5  -1  -3 1122.32 23.0927   1
   5   1  -3 1053.62 21.7794   3
  -5   1   3 1080.71 23.3567   4
   5   1  -3 1076.48 21.9667   1
   4  -1  -3 43.9010 4.97066   1
   4   1  -3 47.4905 5.09686   3
   4   1  -3 35.1002 4.01859   1
  -4   1   3 42.8560 4.87561   4
   3  -1  -3 1283.58 22.5857   1
   3   1  -3 1269.02 20.6203   1
   3   1  -3 1277.52 23.2039   3
  -3   1   3 1275.36 22.8202   4
   2  -1  -3 13.3935 3.16622   2
   2  -1  -3 11.1184 2.58583   1
  -2   1   3 7.88529 2.60746   4
   2   1  -3 10.7040 1.85128   1
   2   1  -3 6.44011 2.91778   3
   1  -1  -3 482.350 10.1846   1
   1  -1  -3 458.075 11.7156   2
  -1   1   3 472.714 10.4052   4
  -1   1   3 455.491 10.3630   1
   1   1  -3 468.960 12.0459   3
   0  -1  -3 4.31234 2.79897   2
   0  -1  -3 7.31760 2.22724   1
   0   1  -3 6.53825 2.09287   2
   0   1   3 10.7049 2.45126   4
   0   1   3 7.48278 2.34226   1
  -1  -1  -3 2878.50 38.6452   1
  -1  -1  -3 2925.36 41.8347   2
  -1  -1  -3 2931.00 40.6665   3
   1   1   3 2830.65 39.0341   1
   1   1   3 2885.53 39.1363   4
  -1   1  -3 2953.40 38.6575   2
  -2  -1  -3 160.495 6.09731   1
  -2  -1  -3 155.626 7.29827   2
  -2  -1  -3 173.499 6.30304   3
   2   1   3 163.031 6.38387   4
  -2   1  -3 176.414 4.70883   4
  -2   1  -3 166.225 6.36258   2
   2   1   3 158.945 6.34034   1
  -2   1  -3 169.242 4.59431   4
  -3  -1  -3 1069.61 19.4324   1
   3   1   3 1069.64 19.8274   1
  -3   1  -3 1109.13 20.5411   2
   3   1   3 1102.31 19.8242   4
   4  -1   3 68.4101 4.66458   1
  -4  -1  -3 56.3376 5.16590   1
  -4  -1  -3 59.1396 6.19578   2
   4   1   3 68.6931 5.43857   1
  -4   1  -3 68.5228 6.22637   2
  -4   1  -3 55.4375 3.64134   1
  -4   1  -3 63.2464 3.61490   1
   4   1   3 65.7205 5.66830   4
   5  -1   3 839.294 18.2752   1
  -5  -1  -3 840.237 18.9995   1
   5  -1   3 856.048 17.2389   4
  -5  -1  -3 815.379 21.6884   2
   5   1   3 848.536 19.5231   1
  -5   1  -3 845.156 16.3571   1
   5   1   3 848.113 19.2381   4
  -5   1  -3 829.938 15.9678   1
  -5   1  -3 808.416 20.3713   2
  -6  -1  -3 302.643 13.7795   2
  -6  -1  -3 322.445 12.0168   1
   6  -1   3 306.743 10.6967   4
   6  -1   3 310.027 11.4911   1
   6   1   3 324.376 12.5285   1
   6   1   3 305.937 11.7040   4
  -6   1  -3 309.080 13.3017   2
  -6   1  -3 328.029 10.5438   1
  -7  -1  -3 36.8274 5.61808   1
   7  -1   3 54.0973 6.46961   1
   7  -1   3 48.2684 5.75638   4
  -7  -1  -3 47.5487 7.47199   2
   7   1   3 59.3964 7.03351   1
  -7   1  -3 52.1924 7.47358   2
   7   1   3 48.2703 6.36225   4
  -7   1  -3 53.7256 6.01758   1
  -8  -1  -3 32.6057 6.10703   1
   8  -1   3 30.2370 5.06454   4
   8  -1   3 29.6268 5.99702   1
  -8  -1  -3 34.8455 7.42212   2
  -8   1  -3 32.2064 5.61658   1
  -8   1  -3 18.7551 5.68166   2
   8   1   3 31.9947 6.32866   1
   8   1   3 18.0867 5.20846   4
  -9  -1  -3 123.315 13.1184   2
  -9  -1  -3 96.2339 9.70932   1
   9  -1   3 107.426 9.51049   4
   9  -1   3 98.1941 10.1035   1
  -9   1  -3 108.318 11.9340   2
  -9   1  -3 104.942 9.41323   1
   9   1   3 105.622 10.2997   4
   9   1   3 107.330 10.8026   1
 -10  -1  -3 1.80831 5.60802   2
 -10  -1  -3 2.84990 4.98259   1
  10  -1   3 4.62083 5.03805   1
 -10   1  -3 3.83772 4.43394   1
  10   1   3 5.40346 4.63856   4
  10   1   3 3.12510 4.77491   1
 -10   1  -3 10.1649 5.98015   2
  11  -1   3 184.146 13.7780   1
 -11  -1  -3 132.738 12.5504   1
 -11  -1  -3 139.232 15.2857   2
 -11   1  -3 153.093 11.3805   1
 -11   1  -3 183.526 17.1206   2
  11   1   3 183.211 13.9594   1
  11   1   3 164.045 18.9933   4
 -12  -1  -3 18.8590 6.76270   1
 -12  -1  -3 5.42854 6.51287   2
  12  -1   3 14.1195 6.56945   1
 -12   1  -3 14.7631 5.82932   1
 -12   1  -3 6.65741 6.32987   2
  12   1   3 13.0771 6.56049   1
  13  -1   3 102.904 13.3513   1
 -13  -1  -3 82.3213 11.2292   1
 -13  -1  -3 126.823 16.3496   2
 -13   1  -3 79.1106 10.2533   1
 -13   1  -3 83.9792 13.7322   2
  13   1   3 102.382 14.1878   1
 -14  -1  -3 60.7475 9.93323   1
 -14  -1  -3 63.9304 12.5371   2
  14  -1   3 41.6950 9.85328   1
 -14   1  -3 33.1763 7.85739   1
 -14   1  -3 55.2447 11.9750   2
  14   1   3 49.4530 10.5714   1
  14  -2  -3 3.82878 6.38395   1
  14   2  -3 5.54543 7.08777   4
  14   2  -3 2.05285 5.76382   1
  13  -2  -3 170.310 16.9243   1
  13   2  -3 130.380 14.5608   1
  13   2  -3 142.502 15.4313   4
  12  -2  -3 197.912 18.1277   1
  12   2  -3 157.783 14.6772   1
  11  -2  -3 325.389 17.6371   1
  11   2  -3 310.724 16.6073   1
  10  -2  -3 5.51340 5.06777   1
  10   2  -3 5.69641 3.12029   3
  10   2  -3 1.94393 3.75163   1
   9  -2  -3 144.369 13.5012   1
   9   2  -3 104.055 7.50682   3
   9   2  -3 101.213 9.79848   1
   8  -2  -3 184.562 11.7683   1
   8   2  -3 184.431 8.95952   3
   8   2  -3 167.326 10.4887   1
   7  -2  -3 13.6167 4.72214   1
   7   2  -3 19.3689 4.00791   3
   7   2  -3 18.9775 4.43668   1
  -7   2   3 11.9665 4.58219   4
   6  -2  -3 845.981 21.6273   1
   6   2  -3 868.088 20.3864   1
  -6   2   3 902.883 22.3011   4
   6   2  -3 852.115 18.9147   3
   5  -2  -3 697.684 18.2609   1
   5   2  -3 695.425 16.4051   3
  -5   2   3 691.760 18.4474   4
   5   2  -3 711.302 16.5211   1
   4  -2  -3 8.44446 3.39243   1
   4   2  -3 13.2098 3.21571   3
  -4   2   3 25.6184 4.30585   4
   4   2  -3 19.2695 3.23176   1
   3  -2  -3 1.97357 2.48575   1
  -3   2   3 -1.0128 2.13622   4
   3   2  -3 -0.4940 1.55756   1
   3   2  -3 -2.1484 2.09816   3
   2  -2  -3 574.150 14.6161   2
   2  -2  -3 583.522 13.7095   1
  -2   2   3 567.955 13.7853   4
   1  -2  -3 64.5774 4.85035   1
   1  -2  -3 57.1308 5.36987   2
  -1   2   3 62.0772 5.18577   1
  -1   2   3 56.9371 4.85933   4
   0  -2  -3 1219.98 21.0894   1
   0  -2  -3 1219.78 22.5928   2
   0   2  -3 1251.34 17.4197   2
   0   2   3 1267.28 21.6163   4
   0   2   3 1230.52 21.3022   1
  -1  -2  -3 8117.61 104.097   2
  -1  -2  -3 8181.29 101.866   1
   1   2   3 8029.68 101.933   4
  -1   2  -3 8137.23 96.8233   2
   1   2   3 8060.55 101.903   1
  -2  -2  -3 3.72773 2.54805   1
  -2  -2  -3 2.95217 2.56530   2
  -2   2  -3 5.00690 1.92715   2
   2   2   3 0.88367 2.07011   1
   2   2   3 2.92957 2.45431   4
  -2   2  -3 3.30547 1.27485   4
  -2   2  -3 2.52078 1.14091   4
  -3  -2  -3 820.778 17.6804   1
  -3  -2  -3 820.166 14.5899   3
  -3  -2  -3 794.805 19.4557   2
  -3   2  -3 799.406 15.9901   2
   3   2   3 842.142 17.8899   4
  -3   2  -3 821.860 14.5473   4
   3   2   3 816.726 17.7236   1
  -4  -2  -3 1453.13 27.1183   1
  -4   2  -3 1444.22 26.3376   2
   4   2   3 1440.82 27.0424   4
  -4   2  -3 1462.63 24.5541   4
   4   2   3 1456.45 27.2182   1
  -5  -2  -3 47.0722 5.57674   1
  -5  -2  -3 46.8011 6.26565   2
   5  -2   3 55.7518 5.43253   1
   5   2   3 57.8168 6.54811   1
  -5   2  -3 61.6922 5.78007   4
   5   2   3 47.8266 5.78699   4
  -5   2  -3 56.1190 3.69575   1
   6  -2   3 895.715 18.4746   4
  -6  -2  -3 866.822 24.3933   2
   6  -2   3 820.648 19.6412   1
  -6  -2  -3 874.399 21.7754   1
  -6   2  -3 846.699 16.8541   1
  -6   2  -3 854.463 16.6234   1
   6   2   3 860.822 21.9470   1
   6   2   3 860.295 21.6988   4
   7  -2   3 413.671 13.1178   4
  -7  -2  -3 449.093 18.3542   2
  -7  -2  -3 396.973 15.2460   1
   7  -2   3 432.019 14.7021   1
  -7   2  -3 413.448 12.4063   1
   7   2   3 417.305 15.4099   4
   7   2   3 407.103 15.7932   1
  -7   2  -3 435.904 12.2054   1
  -8  -2  -3 148.681 10.6615   1
  -8  -2  -3 143.310 13.2516   2
   8  -2   3 146.740 8.90561   4
   8  -2   3 149.309 10.1537   1
   8   2   3 152.045 11.0818   1
  -8   2  -3 146.776 8.47572   1
   8   2   3 137.305 10.3061   4
  -8   2  -3 164.694 8.55428   1
  -9  -2  -3 280.364 14.6701   1
  -9  -2  -3 273.855 16.6240   2
   9  -2   3 272.909 14.1536   1
   9   2   3 249.150 14.0183   4
   9   2   3 238.752 14.1897   1
  -9   2  -3 258.743 11.7093   1
  10  -2   3 792.916 25.4841   1
 -10  -2  -3 882.721 30.3654   2
 -10  -2  -3 775.697 25.2223   1
 -10   2  -3 826.840 22.1089   1
  10   2   3 826.548 26.9402   1
  10   2   3 777.948 25.1855   4
 -11  -2  -3 1.40462 4.72741   1
  11  -2   3 -2.2712 4.45504   1
 -11  -2  -3 2.06588 5.42156   2
 -11   2  -3 -2.1403 5.45909   2
  11   2   3 0.74041 5.37488   1
  11   2   3 -7.0584 4.06435   4
 -11   2  -3 -6.3367 3.69398   1
  12  -2   3 82.6164 11.1333   1
 -12  -2  -3 54.0632 9.76044   1
 -12  -2  -3 82.7039 13.0946   2
  12   2   3 63.8931 10.4115   1
 -12   2  -3 65.6270 11.7485   2
 -12   2  -3 63.2367 8.79345   1
 -13  -2  -3 1.23862 5.72283   1
  13  -2   3 5.19768 6.04837   1
 -13  -2  -3 5.67955 6.39551   2
 -13   2  -3 5.21206 6.52619   2
 -13   2  -3 4.33246 4.73025   1
  13   2   3 -3.5440 5.59911   1
 -14  -2  -3 -0.5860 6.57783   2
 -14  -2  -3 1.94455 6.26997   1
 -14   2  -3 1.77596 4.82017   1
 -14   2  -3 -8.9723 6.12753   2
  14   2   3 8.21186 6.52006   1
  14  -3  -3 67.6143 11.5533   1
  14   3  -3 89.2692 12.2295   1
  14   3  -3 95.7104 13.5826   4
  13  -3  -3 8.33989 6.54487   1
  13   3  -3 8.84871 6.47454   4
  13   3  -3 6.51805 5.36904   1
  12  -3  -3 16.3569 7.20739   1
  12   3  -3 17.7534 6.26410   1
  12   3  -3 12.4686 6.52226   4
  11  -3  -3 5.19482 5.45466   1
  11   3  -3 1.25905 3.87066   1
  11   3  -3 -4.1843 4.43517   4
  10  -3  -3 3.91262 4.75679   1
  10   3  -3 -0.9726 3.54060   1
   9  -3  -3 122.682 11.4679   1
   9   3  -3 147.872 10.7528   1
  -9   3   3 111.986 11.4912   4
   8  -3  -3 39.7309 6.85047   1
   8   3  -3 35.7467 5.91343   1
  -8   3   3 60.0801 8.65132   4
   7  -3  -3 126.917 9.56692   1
   7   3  -3 113.313 8.25295   1
  -7   3   3 107.802 9.87570   4
   6  -3  -3 72.7049 7.88491   1
   6   3  -3 77.5867 7.00569   1
  -6   3   3 66.0936 7.53130   4
   5  -3  -3 47.4081 6.11447   1
   5   3  -3 51.4303 5.29419   1
  -5   3   3 46.1732 6.18524   4
   4  -3  -3 3.60934 2.72245   1
  -4   3   3 -3.3654 2.65390   4
   4   3  -3 -0.5494 1.87385   1
   3  -3  -3 777.281 18.3654   1
   3  -3  -3 771.569 18.8778   2
   3   3  -3 799.124 13.4936   1
  -3   3   3 739.486 18.2591   4
   2  -3  -3 406.589 12.5848   2
   2  -3  -3 387.988 11.9187   1
  -2   3   3 391.552 12.1592   4
   1  -3  -3 382.672 11.4547   1
   1  -3  -3 409.046 12.2646   2
  -1   3   3 372.417 11.5236   4
  -1   3   3 372.859 11.4060   1
   0  -3  -3 293.045 9.80690   1
   0  -3  -3 276.795 10.0269   2
   0   3   3 274.574 9.52104   1
   0   3   3 266.791 9.69129   4
  -1  -3  -3 438.766 13.1076   2
  -1  -3  -3 437.561 12.3937   1
   1   3   3 453.544 12.7500   4
  -2  -3  -3 23.2697 4.44462   2
  -2  -3  -3 22.7305 4.17601   1
   2   3   3 13.9892 3.69127   4
  -2   3  -3 19.4250 2.22162   2
   2   3   3 15.1186 3.28965   1
  -2   3  -3 20.9976 2.19236   4
  -3  -3  -3 1023.19 21.8636   1
  -3  -3  -3 962.963 22.9201   2
   3   3   3 1013.01 21.6443   1
   3   3   3 1046.30 21.9655   4
  -3   3  -3 1013.23 17.4386   4
  -3   3  -3 1037.10 18.0623   2
  -4  -3  -3 509.998 15.4692   1
  -4  -3  -3 510.388 10.5031   3
  -4  -3  -3 510.773 16.7780   2
   4   3   3 499.257 15.1996   4
   4   3   3 501.368 15.0469   1
  -4   3  -3 531.178 12.7284   4
   5  -3   3 314.503 10.2910   1
  -5  -3  -3 316.739 12.6808   1
  -5  -3  -3 300.074 13.6183   2
  -5   3  -3 320.694 10.9047   4
   5   3   3 306.136 12.4089   4
   5   3   3 311.977 12.4573   1
   6  -3   3 48.7879 5.71996   1
  -6  -3  -3 57.5792 8.18100   2
  -6  -3  -3 50.3623 6.61924   1
   6   3   3 31.8201 5.75279   4
   6   3   3 54.4253 6.64426   1
  -6   3  -3 51.1754 6.14373   4
   7  -3   3 312.161 12.6500   1
  -7  -3  -3 278.025 15.2435   2
   7  -3   3 293.298 11.0536   4
  -7  -3  -3 301.598 14.1263   1
   7   3   3 291.926 13.7081   1
   7   3   3 303.861 13.9373   4
  -7   3  -3 289.224 9.05526   1
  -7   3  -3 285.663 9.32119   1
  -7   3  -3 309.703 13.0632   4
  -8  -3  -3 232.845 14.9598   2
  -8  -3  -3 240.992 13.5764   1
   8  -3   3 250.352 12.4875   1
  -8   3  -3 238.027 9.57815   1
   8   3   3 218.251 13.0523   4
   8   3   3 214.756 12.9068   1
  -8   3  -3 242.622 9.32222   1
   9  -3   3 211.674 12.7705   1
  -9  -3  -3 189.148 13.1447   1
  -9  -3  -3 224.801 15.7188   2
   9   3   3 216.944 13.7206   4
   9   3   3 196.567 13.3003   1
  -9   3  -3 212.127 9.97122   1
  10  -3   3 404.458 18.0256   1
 -10  -3  -3 436.712 19.3980   1
 -10  -3  -3 396.509 21.2468   2
 -10   3  -3 395.903 14.2909   1
  10   3   3 403.223 18.4544   4
  10   3   3 455.175 20.0598   1
 -11  -3  -3 16.1808 7.13903   2
  11  -3   3 4.92098 5.75909   1
 -11  -3  -3 9.34661 5.87141   1
  11   3   3 -2.4914 4.62321   4
  11   3   3 7.30284 5.40802   1
 -11   3  -3 6.65881 4.59116   1
 -12  -3  -3 261.939 16.9627   1
 -12  -3  -3 277.432 20.3276   2
  12   3   3 270.153 17.7649   1
 -12   3  -3 250.371 12.8243   1
 -12   3  -3 243.388 17.7423   2
 -13  -3  -3 -3.1355 5.27205   1
 -13  -3  -3 7.23955 7.33605   2
 -13   3  -3 -5.8302 5.70484   2
  13   3   3 -0.4671 5.21728   1
 -13   3  -3 -2.1039 3.85397   1
 -14  -3  -3 144.850 19.0500   2
 -14  -3  -3 112.328 14.4541   1
 -14   3  -3 117.672 11.1471   1
 -14   3  -3 132.990 17.1480   2
  14   3   3 85.0432 12.6986   1
  13  -4  -3 53.9691 10.6151   1
  13   4  -3 40.4300 8.34953   1
  13   4  -3 62.2007 11.4724   4
  12  -4  -3 104.549 12.8127   1
  12   4  -3 113.003 13.0634   1
  12   4  -3 123.568 14.0003   4
  11  -4  -3 35.1626 7.81681   1
  11   4  -3 47.5367 9.40793   4
  11   4  -3 66.2704 9.68197   1
  10  -4  -3 4.00344 5.11419   1
  10   4  -3 3.30043 4.95917   4
  10   4  -3 1.22363 3.86526   1
 -10   4   3 -1.1435 4.85714   4
   9  -4  -3 32.4470 7.31948   1
  -9   4   3 32.3544 7.51608   4
   9   4  -3 35.9172 6.86462   1
   9   4  -3 30.2151 6.89544   4
   8  -4  -3 130.621 11.5479   1
   8   4  -3 137.854 11.8574   4
  -8   4   3 140.935 12.6922   4
   8   4  -3 146.503 9.84722   1
   7  -4  -3 17.7137 5.76302   1
   7   4  -3 11.3324 4.12255   1
  -7   4   3 12.2157 4.90194   4
   6  -4  -3 1.20426 3.53682   1
  -6   4   3 -0.6303 3.79705   4
   6   4  -3 9.51595 3.37226   1
   5  -4  -3 -0.1077 2.83415   1
   5   4  -3 -0.3537 2.30037   1
  -5   4   3 -4.9984 2.53246   4
   4  -4  -3 165.766 9.23182   1
  -4   4   3 150.469 9.06835   4
   4   4  -3 170.691 6.74018   1
   3  -4  -3 334.447 12.5398   2
   3  -4  -3 330.774 12.3029   1
  -3   4   3 337.602 12.5215   4
   2  -4  -3 18.1041 3.98991   2
   2  -4  -3 17.8710 3.78941   1
  -2   4   3 19.7377 4.28618   4
   2   4  -3 21.3367 3.30987   4
  -1  -4   3 1641.35 23.3425   2
   1  -4  -3 1615.90 29.7827   1
   1  -4  -3 1620.80 30.2790   2
  -1   4   3 1621.74 30.1343   4
   1   4  -3 1659.59 24.9033   4
   0  -4  -3 58.5276 6.41718   1
   0  -4  -3 57.1327 5.87504   2
   0   4  -3 69.8504 3.70459   4
   0   4   3 48.0244 5.55583   4
   0   4   3 58.3155 5.67650   1
  -1  -4  -3 86.2686 6.60536   2
  -1  -4  -3 72.2526 6.36185   1
   1   4   3 67.5030 6.37198   4
  -1   4  -3 70.0646 3.82086   4
   1   4   3 76.4805 6.14189   1
  -2  -4  -3 897.893 21.8549   2
  -2  -4  -3 977.641 21.7893   1
  -2   4  -3 956.077 16.3188   4
   2   4   3 959.375 21.8040   4
   2   4   3 938.232 21.1793   1
  -3  -4  -3 975.261 22.5177   1
  -3  -4  -3 928.472 23.0545   2
   3   4   3 950.688 22.2886   4
  -3   4  -3 945.745 17.7560   4
   3   4   3 930.156 21.9422   1
  -4  -4  -3 32.9602 5.66568   1
  -4  -4  -3 27.4411 5.14924   2
   4   4   3 31.3311 5.09595   1
   4   4   3 41.6394 6.16374   4
  -4   4  -3 36.5997 4.47425   4
   5  -4   3 246.856 9.64791   1
  -5  -4  -3 260.755 12.3828   1
  -5  -4  -3 263.536 6.81095   3
  -5  -4  -3 255.369 13.1898   2
   5   4   3 244.611 11.8463   4
  -5   4  -3 278.893 10.4880   4
   5   4   3 266.239 12.2536   1
  -6  -4  -3 203.996 11.7726   1
   6  -4   3 203.133 9.74105   1
  -6  -4  -3 229.218 13.2582   2
   6   4   3 215.078 11.9075   4
   6   4   3 216.283 11.8697   1
  -6   4  -3 190.010 10.0268   4
  -7  -4  -3 536.886 21.2101   2
  -7  -4  -3 585.731 20.3160   1
   7  -4   3 557.863 17.5478   1
   7   4   3 573.495 19.9001   4
   7   4   3 579.791 19.7986   1
  -7   4  -3 555.465 17.9817   4
  -8  -4  -3 20.3639 6.77248   2
  -8  -4  -3 24.3827 7.06769   1
   8  -4   3 16.6102 5.23580   1
  -8   4  -3 19.3264 5.33986   4
   8   4   3 29.9372 6.96122   4
   8   4   3 16.2725 5.51728   1
   9  -4   3 12.3659 5.58447   1
  -9  -4  -3 18.3486 6.20984   1
  -9  -4  -3 30.3588 7.99017   2
   9   4   3 23.0511 6.50134   4
   9   4   3 26.0818 6.40710   1
  -9   4  -3 18.2819 3.91718   1
  -9   4  -3 20.1961 5.85790   4
 -10  -4  -3 55.3602 10.3674   2
 -10  -4  -3 28.4624 7.52024   1
  10   4   3 42.8101 8.41144   4
  10   4   3 59.1958 9.89387   1
 -10   4  -3 41.0533 5.63465   1
 -11  -4  -3 300.260 17.8931   1
 -11  -4  -3 287.676 19.9399   2
 -11   4  -3 296.255 11.9570   1
  11   4   3 266.836 17.0200   1
  11   4   3 306.093 17.9094   4
 -12  -4  -3 50.1680 9.41279   1
 -12  -4  -3 63.9106 12.4115   2
  12   4   3 75.5357 12.4809   1
 -12   4  -3 73.7701 7.49332   1
  12   4   3 40.4236 9.32725   4
 -13  -4  -3 14.5043 7.57013   1
 -13  -4  -3 14.1961 8.20118   2
 -13   4  -3 27.0795 8.85356   2
 -13   4  -3 21.6898 5.44081   1
  13   4   3 13.0705 7.16640   1
 -13  -5   3 -1.8800 5.93511   1
 -13  -5   3 -5.7898 6.40128   2
  13  -5  -3 1.57392 6.19037   1
  13   5  -3 -1.8217 4.87818   1
  13   5  -3 2.89020 6.25928   4
 -12  -5   3 31.3555 9.69288   2
  12  -5  -3 19.3274 7.41546   1
  12   5  -3 36.7283 9.09588   4
  12   5  -3 22.1337 6.94546   1
  11  -5  -3 1.29295 4.60070   1
  11   5  -3 3.66143 5.58119   4
  11   5  -3 3.42242 4.62005   1
 -11   5   3 5.15272 5.99092   4
  10  -5  -3 56.0054 9.11543   1
  10   5  -3 55.1025 9.39071   4
 -10   5   3 36.3682 8.21070   4
  10   5  -3 50.1237 7.78145   1
   9  -5  -3 21.3914 6.95907   1
   9   5  -3 22.2296 5.48984   1
  -9   5   3 37.3122 7.93653   4
   9   5  -3 25.3424 6.81084   4
   8  -5  -3 87.9659 10.7760   1
   8   5  -3 124.032 10.9504   1
   8   5  -3 113.720 11.2859   4
  -8   5   3 98.6759 11.2364   4
   7  -5  -3 8.43625 4.46248   1
  -7   5   3 10.9668 5.28986   4
   7   5  -3 7.12804 3.86428   1
   7   5  -3 10.0358 4.74111   4
   6  -5  -3 441.291 17.1342   1
  -6   5   3 413.479 17.0551   4
   6   5  -3 466.924 14.3253   1
   6   5  -3 470.820 16.8935   4
   5  -5  -3 40.0244 6.95139   1
  -5   5   3 47.1908 7.23996   4
   5   5  -3 45.5300 6.13295   4
   5   5  -3 47.0223 5.07303   1
   4  -5  -3 79.9948 8.05011   1
   4   5  -3 80.7411 7.31486   4
  -4   5   3 68.6345 7.65520   4
   4   5  -3 79.0473 4.92262   1
   3  -5  -3 303.159 12.4694   1
   3  -5  -3 322.665 12.8179   2
  -3  -5   3 300.823 10.4107   2
  -3   5   3 295.895 12.9248   4
   3   5  -3 310.756 11.0953   4
   2  -5  -3 502.227 15.5503   2
   2  -5  -3 514.893 15.9502   1
  -2  -5   3 509.539 11.9280   2
  -2   5   3 508.080 16.2996   4
   2   5  -3 486.809 13.1436   4
   1  -5  -3 153.300 8.87363   1
  -1  -5   3 140.188 4.81408   2
   1  -5  -3 142.288 8.51510   2
  -1   5   3 142.796 8.85294   4
   1   5  -3 138.760 6.54409   4
   0  -5  -3 65.1803 6.73189   2
   0  -5  -3 53.4517 6.04253   1
   0   5  -3 57.7437 4.76331   4
   0   5   3 51.8415 6.19792   4
   0   5   3 53.7521 5.85453   1
  -1  -5  -3 942.149 22.3046   1
  -1  -5  -3 879.021 21.9339   2
   1   5   3 874.862 21.8872   4
  -1   5  -3 940.438 17.2960   4
   1   5   3 881.648 21.3000   1
  -2  -5  -3 242.888 11.1974   1
  -2  -5  -3 216.673 10.7221   2
  -2   5  -3 220.780 7.88391   4
   2   5   3 226.803 10.6360   1
   2   5   3 236.930 11.2292   4
  -3  -5  -3 328.473 13.4287   1
  -3  -5  -3 307.347 13.3643   2
   3   5   3 344.075 13.3282   1
   3   5   3 306.370 13.0193   4
  -3   5  -3 321.539 10.2931   4
  -4  -5  -3 18.1071 4.75345   1
  -4  -5  -3 26.6477 5.60133   2
   4   5   3 23.7176 5.46676   4
   4   5   3 24.4343 5.51112   1
  -4   5  -3 19.5492 3.93666   4
  -5  -5  -3 13.2477 4.92997   1
  -5  -5  -3 6.57615 4.34272   2
   5  -5   3 18.1528 4.02836   1
  -5   5  -3 15.9315 4.10064   4
   5   5   3 11.8352 4.57335   1
   5   5   3 17.0621 5.10672   4
  -6  -5  -3 53.9077 8.05341   1
   6  -5   3 55.4345 6.74956   1
  -6  -5  -3 60.9212 9.02338   2
  -6   5  -3 53.2521 6.78680   4
   6   5   3 48.6578 7.14338   1
   6   5   3 36.7652 6.99890   4
  -7  -5  -3 16.7335 6.05728   1
   7  -5   3 17.0984 5.00049   1
  -7  -5  -3 8.80858 5.62419   2
   7   5   3 15.5066 5.73565   1
   7   5   3 23.2020 6.38598   4
  -7   5  -3 12.0839 4.65664   4
  -8  -5  -3 138.732 14.1198   2
  -8  -5  -3 164.340 12.6664   1
   8   5   3 168.507 14.0099   4
   8   5   3 160.196 12.1787   1
  -8   5  -3 161.394 11.3011   4
  -9  -5  -3 43.5542 9.50866   2
  -9  -5  -3 34.3184 7.73132   1
   9   5   3 28.1857 6.92784   1
   9   5   3 40.3196 7.92034   4
  -9   5  -3 30.1197 6.68188   4
 -10  -5  -3 230.285 17.1097   2
 -10  -5  -3 205.345 15.1619   1
  10   5   3 218.238 15.1004   1
  10   5   3 201.257 14.8256   4
 -10   5  -3 194.180 14.0149   4
 -11  -5  -3 18.0071 7.64880   2
 -11  -5  -3 -0.3256 5.31917   1
  11   5   3 17.0513 7.64712   4
  11   5   3 3.35104 5.07047   1
 -12  -5  -3 22.9999 8.32233   1
 -12  -5  -3 19.9548 8.28331   2
  12   5   3 20.1224 8.19605   4
  12   5   3 15.3311 6.87068   1
 -13  -5  -3 161.303 18.6237   2
 -13  -5  -3 164.933 16.9117   1
 -13   5  -3 218.222 19.9741   2
  13   5   3 159.153 16.8840   1
 -12  -6   3 11.8558 7.97497   2
 -12  -6   3 30.7135 9.17523   1
  12  -6  -3 18.8653 8.06369   1
 -12   6   3 24.3816 8.77643   4
  12   6  -3 15.6165 6.26273   1
  12   6  -3 17.4565 7.74578   4
 -11  -6   3 167.331 17.6747   2
 -11  -6   3 179.758 17.9978   1
  11  -6  -3 204.612 15.8842   1
 -11   6   3 160.516 15.8091   4
  11   6  -3 175.509 16.5930   4
  11   6  -3 183.511 13.0255   1
  10  -6  -3 1.49387 5.21635   1
 -10  -6   3 -5.3091 4.96271   2
  10   6  -3 -0.7863 4.04691   1
  10   6  -3 0.99074 5.40928   4
 -10   6   3 -0.3124 5.20530   4
   9  -6  -3 118.167 12.7363   1
  -9  -6   3 128.692 14.0692   2
  -9   6   3 134.666 13.8484   4
   9   6  -3 132.281 10.2093   1
   9   6  -3 136.921 13.4146   4
   8  -6  -3 56.6769 9.59739   1
  -8  -6   3 72.0101 10.3204   2
  -8   6   3 71.9322 10.4877   4
   8   6  -3 79.2483 8.57053   1
   8   6  -3 57.0337 8.73315   4
  -7  -6   3 1622.34 38.2139   2
   7  -6  -3 1626.94 37.9337   1
   7   6  -3 1678.30 32.7609   1
  -7   6   3 1637.54 38.8052   4
   7   6  -3 1620.08 37.2575   4
  -6  -6   3 2.07296 3.91271   2
   6  -6  -3 0.40798 3.93475   1
   6   6  -3 -0.0552 2.80699   1
   6   6  -3 -2.6780 3.19371   4
  -6   6   3 -0.6189 4.12508   4
   5  -6  -3 7.96439 4.34111   1
  -5  -6   3 5.73912 3.62293   2
   5   6  -3 3.08453 2.73412   1
   5   6  -3 9.92539 4.31987   4
  -5   6   3 8.76040 4.70929   4
   4  -6  -3 68.8367 8.19730   1
  -4  -6   3 65.9371 7.00958   2
  -4   6   3 52.4979 7.51023   4
   4   6  -3 71.5830 7.51921   4
  -3  -6   3 173.550 8.20938   2
   3  -6  -3 149.215 9.55545   2
   3  -6  -3 174.953 10.7188   1
   3   6  -3 169.207 9.19349   4
  -3   6   3 183.867 11.2456   4
  -2  -6   3 192.497 8.82009   1
   2  -6  -3 184.460 10.6252   1
   2  -6  -3 185.862 10.0418   2
  -2  -6   3 180.379 7.16052   2
  -2   6   3 182.785 10.7197   4
   2   6  -3 192.216 9.04290   4
  -1  -6   3 3.05850 1.63236   2
   1  -6  -3 -2.8966 2.60814   2
   1  -6  -3 1.80111 3.28762   1
   1   6  -3 0.74287 2.54198   4
  -1   6   3 4.55572 3.53601   4
   0  -6  -3 4.58380 3.12256   2
   0  -6  -3 0.01289 2.95852   1
   0   6  -3 -1.0334 2.37836   4
   0   6   3 9.01652 4.27795   4
  -1  -6  -3 102.340 8.89202   1
  -1  -6  -3 107.448 8.04301   2
   1   6   3 121.083 10.6339   4
  -1   6  -3 98.9736 6.47291   4
   1   6   3 92.8081 8.41553   1
  -2  -6  -3 21.2288 4.96441   1
  -2  -6  -3 25.1835 5.21080   2
  -2   6  -3 26.8481 4.26703   4
   2   6   3 30.8946 5.76608   1
   2   6   3 19.6638 5.15983   4
  -3  -6  -3 6.62904 4.17752   1
  -3  -6  -3 7.44646 4.16123   2
  -3   6  -3 8.99436 3.32195   4
   3   6   3 4.46387 3.36324   1
   3   6   3 8.69448 4.73827   4
  -4  -6  -3 17.7031 5.59530   1
  -4  -6  -3 15.0866 5.25363   2
  -4   6  -3 10.8073 3.88942   4
   4   6   3 9.72043 4.13180   1
   4   6   3 8.68632 4.54029   4
   5  -6   3 168.597 9.09140   1
  -5  -6  -3 154.521 11.5710   2
  -5  -6  -3 157.145 11.6456   1
  -5   6  -3 164.358 9.60296   4
   5   6   3 168.644 11.2352   1
   5   6   3 166.594 11.5670   4
  -6  -6  -3 74.4841 9.66444   2
  -6  -6  -3 76.9303 10.0379   1
   6   6   3 82.5974 9.98038   1
   6   6   3 67.3695 9.06359   4
  -6   6  -3 64.9862 7.69880   4
  -7  -6  -3 655.449 25.0765   2
  -7  -6  -3 696.543 24.4900   1
   7   6   3 655.756 22.9711   1
   7   6   3 708.618 24.5412   4
  -7   6  -3 673.948 21.4616   4
  -8  -6  -3 438.260 21.5722   2
  -8  -6  -3 431.127 20.0398   1
  -8   6  -3 444.257 18.2639   4
   8   6   3 480.295 20.2668   1
   8   6   3 470.140 20.4675   4
  -9  -6  -3 131.355 14.7874   2
  -9  -6  -3 137.169 14.7784   1
   9   6   3 173.923 15.6313   4
   9   6   3 138.114 13.0552   1
  -9   6  -3 161.497 12.3003   4
 -10  -6  -3 30.1908 8.70418   2
 -10  -6  -3 39.5518 9.28023   1
  10   6   3 33.0084 7.93422   4
  10   6   3 29.9213 7.57889   1
 -10   6  -3 48.7372 8.87624   4
 -11  -6  -3 77.4469 13.0702   2
 -11  -6  -3 48.8354 10.6771   1
  11   6   3 57.9112 10.8393   4
  11   6   3 56.9143 10.2916   1
 -11   6  -3 63.9695 10.4194   4
 -12  -6  -3 -3.1636 5.87779   2
 -12  -6  -3 0.22823 5.28159   1
  12   6   3 2.00681 6.11491   4
  12   6   3 17.0130 8.01047   1
  12  -7  -3 2.32387 5.82714   1
 -12  -7   3 2.82983 6.32370   1
 -12  -7   3 9.21619 7.92910   2
  12   7  -3 1.83805 6.10040   4
 -12   7   3 10.7972 7.53991   4
  12   7  -3 2.32834 4.79891   1
 -11  -7   3 1.88275 6.71722   1
 -11  -7   3 -0.5725 6.19886   2
  11  -7  -3 10.0520 6.69642   1
 -11   7   3 9.80563 6.46621   4
  11   7  -3 0.17034 4.53732   1
  11   7  -3 26.8937 8.22898   4
  10  -7  -3 45.7046 10.1048   1
 -10  -7   3 45.7207 10.4566   1
 -10  -7   3 62.5008 10.7897   2
  10   7  -3 43.4193 9.67262   4
 -10   7   3 40.8164 9.29646   4
  10   7  -3 29.3144 6.73831   1
  -9  -7   3 64.3911 10.0625   1
   9  -7  -3 85.1234 12.3400   1
  -9  -7   3 90.6249 12.1279   2
   9   7  -3 90.9849 9.73985   1
   9   7  -3 60.9838 10.2935   4
  -9   7   3 63.1663 10.3800   4
   8  -7  -3 788.152 27.1401   1
  -8  -7   3 780.474 26.7767   2
  -8  -7   3 794.516 27.0509   1
   8   7  -3 721.460 25.9256   4
  -8   7   3 737.028 27.3586   4
   8   7  -3 785.018 21.8081   1
  -7  -7   3 205.302 13.6803   1
  -7  -7   3 208.346 13.3068   2
   7  -7  -3 192.291 13.8721   1
   7   7  -3 214.536 13.8284   4
  -7   7   3 237.471 15.2007   4
   7   7  -3 210.264 10.7785   1
  -6  -7   3 0.88146 4.30890   1
   6  -7  -3 2.52506 4.56600   1
  -6  -7   3 7.73958 4.47668   2
   6   7  -3 5.74499 3.26384   1
   6   7  -3 2.44433 4.08307   4
  -6   7   3 -2.3188 4.49729   4
  -5  -7   3 513.822 18.6069   1
   5  -7  -3 496.240 19.5494   1
  -5  -7   3 521.612 17.5562   2
  -5   7   3 460.368 19.3690   4
   5   7  -3 501.633 18.4449   4
   5   7  -3 505.688 13.1094   1
  -4  -7   3 9.48949 3.69657   2
  -4  -7   3 9.81407 4.76780   1
   4  -7  -3 8.09234 4.85203   1
  -4   7   3 14.9488 5.35105   4
   4   7  -3 2.95698 3.74019   4
  -3  -7   3 523.178 14.5633   2
   3  -7  -3 501.033 17.5472   2
  -3  -7   3 517.291 16.7133   1
   3  -7  -3 510.579 18.8348   1
  -3   7   3 527.913 19.4648   4
   3   7  -3 519.505 17.1732   4
  -2  -7   3 32.4510 5.48011   1
  -2  -7   3 33.5854 4.08528   2
   2  -7  -3 21.8721 5.30848   2
   2  -7  -3 25.3480 5.89835   1
  -2   7   3 31.2561 6.33921   4
   2   7  -3 24.2334 4.85620   4
  -1  -7   3 1250.07 19.9525   2
   1  -7  -3 1238.44 29.9991   1
   1  -7  -3 1250.08 28.6977   2
  -1  -7   3 1290.05 25.7600   1
   1   7  -3 1289.84 26.6260   4
  -1   7   3 1173.35 30.0736   4
   0  -7  -3 -2.0209 3.26470   1
   0  -7  -3 -4.4252 2.64383   2
   0   7   3 4.57800 4.51877   4
   0   7  -3 0.06246 3.17638   4
  -1  -7  -3 772.725 22.2839   2
  -1  -7  -3 830.468 23.7102   1
   1   7   3 752.020 23.2995   4
   1   7   3 784.820 22.2775   1
  -1   7  -3 783.229 19.3158   4
  -2  -7  -3 164.964 10.9260   2
  -2  -7  -3 154.975 11.0450   1
  -2   7  -3 161.900 8.95393   4
   2   7   3 166.341 11.7378   4
   2   7   3 155.915 10.5257   1
  -3  -7  -3 383.828 16.7819   1
  -3  -7  -3 383.520 16.4468   2
  -3   7  -3 438.658 14.6247   4
   3   7   3 412.240 17.4767   4
   3   7   3 407.492 16.2300   1
  -4  -7  -3 113.582 11.5857   1
  -4  -7  -3 127.891 11.8460   2
   4   7   3 104.893 10.7574   4
   4   7   3 108.118 10.3117   1
  -4   7  -3 106.590 9.14193   4
  -5  -7  -3 -1.1875 3.99103   2
  -5  -7  -3 -0.4041 3.74076   1
   5   7   3 2.53932 4.77692   4
   5   7   3 3.41588 3.92351   1
  -5   7  -3 -0.5528 3.41275   4
  -6  -7  -3 39.6386 8.12009   2
  -6  -7  -3 30.5491 6.88143   1
   6   7   3 28.3761 6.23739   1
   6   7   3 29.1651 7.37593   4
  -6   7  -3 22.0375 5.70408   4
  -7  -7  -3 0.19073 4.25928   1
  -7  -7  -3 -2.5818 4.45253   2
   7   7   3 -0.2418 4.91797   4
  -7   7  -3 4.38393 4.21480   4
   7   7   3 -4.8915 3.52981   1
  -8  -7  -3 23.2941 6.81278   1
  -8  -7  -3 29.0431 8.30067   2
  -8   7  -3 34.5955 7.21700   4
   8   7   3 41.6237 8.67285   4
   8   7   3 37.1767 7.84379   1
  -9  -7  -3 -0.2183 5.12445   1
  -9  -7  -3 8.26383 6.41299   2
  -9   7  -3 4.83377 4.94251   4
   9   7   3 0.60752 4.57638   1
   9   7   3 1.96401 5.00003   4
 -10  -7  -3 43.3494 10.4469   2
 -10  -7  -3 26.0552 7.72621   1
  10   7   3 31.5065 8.52870   4
 -10   7  -3 33.2427 7.93363   4
  10   7   3 20.1454 7.34701   1
 -11  -7  -3 43.2512 10.0811   1
 -11  -7  -3 10.4307 8.45488   2
  11   7   3 26.4076 8.83244   1
  11   7   3 47.9006 10.4912   4
 -11   7  -3 46.0407 9.02861   4
 -12  -7  -3 66.0997 13.5618   2
 -12  -7  -3 43.0591 9.93564   1
  12   7   3 58.4879 11.1448   1
  12   7   3 82.0035 13.1250   4
 -12   7  -3 73.7675 11.8178   4
 -11  -8   3 94.8325 15.1804   1
 -11  -8   3 95.4795 14.0952   2
  11  -8  -3 75.1321 13.3775   1
  11   8  -3 92.4264 13.8590   4
 -11   8   3 102.214 14.3332   4
  11   8  -3 72.3409 9.28476   1
 -10  -8   3 94.0338 16.6356   1
 -10  -8   3 87.3305 12.6712   2
  10  -8  -3 70.5436 11.2155   1
 -10   8   3 75.9124 12.8702   4
  10   8  -3 87.9902 9.52511   1
  10   8  -3 85.0286 12.7442   4
   9  -8  -3 179.250 16.0837   1
  -9  -8   3 159.035 15.6675   2
  -9  -8   3 189.832 25.5144   1
   9   8  -3 166.174 15.7812   4
  -9   8   3 142.137 15.6738   4
   9   8  -3 160.116 11.0296   1
   8  -8  -3 106.133 13.1105   1
  -8  -8   3 71.7914 10.5954   2
   8   8  -3 59.4545 9.68753   4
  -8   8   3 97.3819 12.4436   4
   8   8  -3 84.0900 8.60535   1
   7  -8  -3 28.6046 7.53784   1
  -7  -8   3 36.1185 7.28460   2
   7   8  -3 35.7647 5.44038   1
   7   8  -3 20.7546 6.48810   4
  -7   8   3 32.2742 7.97962   4
   6  -8  -3 4.46028 5.21912   1
  -6  -8   3 2.16406 3.88223   2
   6   8  -3 10.1047 3.33531   1
   6   8  -3 -5.7279 3.53721   4
  -6   8   3 3.09776 5.06855   4
  -5  -8   3 7.46039 4.01946   2
   5  -8  -3 -2.0887 3.92065   1
   5   8  -3 8.94073 4.86605   4
  -5   8   3 0.92698 4.69273   4
   4  -8  -3 33.0690 7.20052   1
  -4  -8   3 29.4430 5.29584   2
  -4   8   3 42.6888 7.85357   4
   4   8  -3 24.7030 5.98300   4
   3  -8  -3 92.6725 10.3573   1
  -3  -8   3 85.7336 7.20493   2
   3  -8  -3 89.6117 9.53524   2
   3   8  -3 94.3857 9.32928   4
  -3   8   3 85.2999 10.3917   4
  -2  -8   3 0.07071 2.32333   2
   2  -8  -3 2.44119 3.63752   2
   2  -8  -3 6.10096 4.93162   1
  -2   8   3 -5.0381 3.66155   4
   2   8  -3 -0.6546 3.58815   4
   1  -8  -3 95.3402 10.3327   1
   1  -8  -3 113.327 10.2740   2
  -1  -8   3 108.345 5.02965   2
  -1   8   3 93.2230 10.5403   4
   1   8  -3 108.140 9.57362   4
   0  -8  -3 158.786 10.6949   2
   0  -8  -3 197.044 12.5815   1
   0   8  -3 193.124 10.8043   4
   0   8   3 153.224 13.2787   4
  -1  -8  -3 26.9642 6.05573   2
  -1  -8  -3 17.1827 5.63430   1
  -1   8  -3 10.3985 4.10727   4
   1   8   3 22.0908 6.30693   4
  -2  -8  -3 12.6550 5.34472   1
  -2  -8  -3 12.9822 5.11817   2
  -2   8  -3 26.3372 5.50329   4
   2   8   3 11.9965 5.82484   4
   2   8   3 12.3243 4.76340   1
  -3  -8  -3 20.0280 6.10474   1
  -3  -8  -3 8.33878 4.97408   2
  -3   8  -3 20.1396 5.28769   4
   3   8   3 17.7155 5.65845   1
   3   8   3 6.68794 5.49976   4
  -4  -8  -3 68.4712 9.72757   2
  -4  -8  -3 47.8167 7.92761   1
  -4   8  -3 57.1252 7.70063   4
   4   8   3 38.8525 8.13620   4
   4   8   3 48.4162 7.69906   1
  -5  -8  -3 14.7840 5.89637   2
  -5  -8  -3 4.23467 4.91200   1
  -5   8  -3 11.3798 4.65496   4
   5   8   3 14.1177 5.89590   4
   5   8   3 8.67594 4.99402   1
  -6  -8  -3 68.0117 10.5557   2
  -6  -8  -3 65.7207 10.0731   1
   6   8   3 61.5971 8.96263   1
   6   8   3 62.6658 9.71673   4
  -6   8  -3 80.4641 9.27005   4
  -7  -8  -3 137.110 13.5068   1
  -7  -8  -3 156.870 15.4992   2
   7   8   3 155.112 14.9537   4
   7   8   3 166.087 15.6191   1
  -7   8  -3 170.461 12.3417   4
  -8  -8  -3 169.200 17.0011   2
  -8  -8  -3 108.458 12.5419   1
   8   8   3 141.916 15.2040   4
   8   8   3 148.858 15.0024   1
  -8   8  -3 139.930 13.2500   4
  -9  -8  -3 -1.4266 5.38999   2
  -9  -8  -3 1.70600 5.23807   1
   9   8   3 9.66795 7.03109   4
  -9   8  -3 0.64882 4.63604   4
   9   8   3 -2.8409 4.52877   1
 -10  -8  -3 8.45568 6.74784   1
 -10  -8  -3 10.9349 7.56118   2
 -10   8  -3 -2.3140 4.88182   4
  10   8   3 6.77700 5.53618   1
  10   8   3 10.6722 7.60763   4
 -11  -8  -3 3.03819 6.12683   1
 -11  -8  -3 4.32658 6.72604   2
  11   8   3 6.45675 6.36752   1
  11   8   3 -0.3486 6.54770   4
 -11   8  -3 -3.0271 4.96016   4
  10  -9  -3 22.9452 9.42943   1
 -10  -9   3 24.9800 7.86094   2
  10   9  -3 29.4301 6.27511   1
  10   9  -3 22.2529 8.24842   4
 -10   9   3 26.3995 8.94623   4
   9  -9  -3 45.2103 10.4793   1
  -9  -9   3 29.5993 8.60899   2
   9   9  -3 62.2020 7.60761   1
  -9   9   3 42.0427 9.85629   4
   9   9  -3 38.5929 9.09563   4
  -8  -9   3 85.9282 11.3207   2
   8  -9  -3 91.1192 12.6792   1
   8   9  -3 75.3535 11.2624   4
  -8   9   3 71.9744 11.5311   4
   8   9  -3 76.3176 7.76609   1
  -7  -9   3 214.360 14.0431   2
   7  -9  -3 208.636 15.8108   1
  -7   9   3 216.921 15.9338   4
   7   9  -3 232.883 16.0167   4
   7   9  -3 228.055 10.1360   1
  -6  -9   3 93.5859 10.5623   2
   6  -9  -3 105.835 12.5024   1
   6   9  -3 126.013 12.6276   4
  -6   9   3 116.943 13.3560   4
  -5  -9   3 24.4211 5.60431   2
   5  -9  -3 19.8583 6.92653   1
  -5   9   3 32.2002 8.00917   4
   5   9  -3 23.3088 6.61388   4
  -4  -9   3 336.161 13.2889   2
   4  -9  -3 313.298 16.9649   1
   4   9  -3 328.003 16.3423   4
  -4   9   3 333.552 18.1927   4
   3  -9  -3 201.582 12.5139   2
  -3  -9   3 202.024 12.4459   2
   3  -9  -3 190.163 13.5627   1
  -3   9   3 207.184 14.6959   4
   3   9  -3 209.693 13.1116   4
   2  -9  -3 1347.61 34.7200   1
   2  -9  -3 1271.95 31.3776   2
  -2   9   3 1253.55 34.5670   4
   2   9  -3 1301.61 31.5055   4
   1  -9  -3 626.506 21.0133   2
   1  -9  -3 661.790 23.7119   1
   1   9  -3 646.191 20.8696   4
  -1   9   3 663.682 24.3472   4
   0  -9  -3 103.197 11.6255   1
   0  -9  -3 107.496 10.5389   2
   0   9  -3 109.049 10.0116   4
   0   9   3 102.808 11.5308   4
  -1  -9  -3 3.64772 4.31679   1
  -1  -9  -3 10.1638 4.68078   2
  -1   9  -3 -0.6440 3.65055   4
   1   9   3 5.89661 5.15671   4
  -2  -9  -3 6.54062 4.51955   2
  -2  -9  -3 1.95117 4.24479   1
   2   9   3 0.46309 4.71608   4
  -2   9  -3 -0.0552 3.65746   4
  -3  -9  -3 161.190 12.1572   2
  -3  -9  -3 173.921 13.3858   1
   3   9   3 168.509 12.0056   1
   3   9   3 143.943 13.8103   4
  -3   9  -3 154.889 10.9017   4
  -4  -9  -3 49.1439 8.32035   1
  -4  -9  -3 79.7401 10.5765   2
   4   9   3 55.2410 8.95334   1
   4   9   3 65.6360 10.2259   4
  -4   9  -3 82.9332 9.61768   4
  -5  -9  -3 6.76828 5.56302   1
  -5  -9  -3 6.62006 5.18246   2
   5   9   3 6.08427 4.87142   1
   5   9   3 12.9676 6.72551   4
  -5   9  -3 4.87240 4.32371   4
  -6  -9  -3 -2.3521 5.05655   1
  -6  -9  -3 -5.2729 4.20783   2
   6   9   3 -1.2502 3.96321   1
   6   9   3 0.32890 5.87728   4
  -6   9  -3 0.92100 3.96597   4
  -7  -9  -3 23.8546 7.56131   2
  -7  -9  -3 34.3827 8.07586   1
  -7   9  -3 19.3958 6.53177   4
   7   9   3 18.6208 6.97670   1
   7   9   3 27.3119 8.22348   4
  -8  -9  -3 25.0201 7.65340   1
  -8  -9  -3 31.3536 8.99239   2
  -8   9  -3 24.0067 6.99428   4
   8   9   3 25.3950 7.11862   1
   8   9   3 24.3324 8.17228   4
  -9  -9  -3 -1.5646 5.89145   2
  -9  -9  -3 -0.7717 4.70135   1
  -9   9  -3 4.38767 5.71482   4
   9   9   3 1.46581 5.15965   1
   9   9   3 0.99080 6.08942   4
 -10  -9  -3 72.5797 14.0733   1
 -10  -9  -3 68.3775 12.9616   2
 -10   9  -3 71.1914 11.0269   4
  10   9   3 55.0832 11.6591   4
  10   9   3 47.2115 10.3613   1
  -9 -10   3 153.619 15.8725   2
  -9  10   3 115.587 14.8077   4
   9  10  -3 90.8902 13.2035   4
   8 -10  -3 136.054 15.7796   1
  -8 -10   3 161.012 15.4509   2
   8  10  -3 112.848 13.9715   4
  -8  10   3 130.366 14.9303   4
  -7 -10   3 26.8377 8.45398   2
   7 -10  -3 28.4268 8.33443   1
   7  10  -3 31.5902 8.03365   4
  -7  10   3 13.2580 7.04398   4
   6 -10  -3 -3.8966 4.32895   1
  -6  10   3 0.56648 5.40892   4
   6  10  -3 2.02544 5.00285   4
   5 -10  -3 5.13198 5.28871   1
  -5  10   3 11.1772 6.42739   4
   5  10  -3 8.13304 5.42244   4
   4 -10  -3 81.3096 11.3511   1
   4  10  -3 69.7829 9.82156   4
  -4  10   3 67.3860 10.8465   4
   3 -10  -3 17.1057 6.51684   1
   3 -10  -3 13.9452 5.42083   2
  -3  10   3 10.2951 5.97178   4
   3  10  -3 2.20019 4.68473   4
   2 -10  -3 67.3082 10.7983   1
   2 -10  -3 61.8038 8.37612   2
  -2  10   3 35.4469 8.16747   4
   2  10  -3 61.2573 8.89195   4
   1 -10  -3 217.914 14.9017   1
   1 -10  -3 182.181 11.8610   2
  -1  10   3 194.564 14.7761   4
   1  10  -3 198.071 13.0562   4
   0 -10  -3 53.2120 10.1299   1
   0 -10  -3 24.5427 6.26438   2
   0  10   3 31.1807 8.06012   4
   0  10  -3 27.8856 6.73347   4
  -1 -10  -3 105.952 13.6997   1
  -1 -10  -3 110.914 11.6506   2
  -1  10  -3 87.2959 9.97331   4
   1  10   3 88.5341 11.8533   4
  -2 -10  -3 23.2672 6.05228   2
  -2 -10  -3 27.9153 7.71517   1
  -2  10  -3 21.6042 6.39351   4
   2  10   3 14.4476 6.72898   4
  -3 -10  -3 171.506 12.8230   2
  -3 -10  -3 200.307 15.3259   1
   3  10   3 202.298 17.6140   4
  -3  10  -3 175.000 12.5230   4
  -4 -10  -3 18.3575 6.33181   2
  -4 -10  -3 10.6088 6.51035   1
  -4  10  -3 12.5138 5.62229   4
   4  10   3 11.7238 5.67779   1
   4  10   3 9.18961 6.91806   4
  -5 -10  -3 16.6212 6.33578   1
  -5 -10  -3 22.4305 7.08548   2
   5  10   3 15.5318 6.28028   1
  -5  10  -3 11.3546 5.23436   4
   5  10   3 22.5808 7.87158   4
  -6 -10  -3 53.6790 11.1931   1
  -6 -10  -3 37.3083 8.81786   2
  -6  10  -3 37.1348 7.85782   4
   6  10   3 46.3218 10.3662   4
   6  10   3 35.1893 7.93890   1
  -7 -10  -3 6.59353 5.99235   1
  -7 -10  -3 3.51150 5.87982   2
  -7  10  -3 -7.9360 4.14280   4
   7  10   3 9.57796 5.76422   1
   7  10   3 -1.6933 5.97969   4
  -8 -10  -3 219.951 17.4272   2
   8  10   3 214.331 20.1991   4
   8  10   3 200.993 15.1596   1
  -8  10  -3 142.812 14.5595   4
  -9 -10  -3 1.91983 6.17444   2
  -9 -10  -3 6.93283 5.88948   1
   9  10   3 13.6830 8.14534   4
  -9  10  -3 -0.4400 5.28323   4
   9  10   3 8.23273 5.60052   1
  -7  11   3 41.1074 10.0273   4
   7  11  -3 46.3963 9.99899   4
  -6  11   3 -2.5800 5.55185   4
   6  11  -3 -5.3125 4.78010   4
   5 -11  -3 29.2670 9.36332   1
  -5  11   3 12.8926 7.03329   4
   5  11  -3 13.4245 6.70254   4
   4 -11  -3 133.085 15.0039   1
  -4  11   3 128.626 15.1806   4
   4  11  -3 113.652 12.6890   4
   3 -11  -3 77.8335 11.6936   1
  -3  11   3 36.7235 9.12764   4
   3  11  -3 42.7104 8.74581   4
   2 -11  -3 211.154 13.3698   2
   2 -11  -3 197.381 15.6147   1
   2  11  -3 176.019 13.6265   4
  -2  11   3 190.932 17.7203   4
   1 -11  -3 6.04195 5.50302   1
   1 -11  -3 3.07564 4.63330   2
  -1  11   3 7.59072 6.29759   4
   1  11  -3 -2.2550 4.78924   4
   0 -11  -3 145.508 14.6513   1
   0 -11  -3 147.914 11.8862   2
   0  11   3 145.907 15.0836   4
   0  11  -3 160.083 14.1547   4
  -1 -11  -3 129.388 15.7943   1
  -1 -11  -3 126.404 12.5484   2
  -1  11  -3 91.5152 11.0352   4
   1  11   3 108.654 13.3436   4
  -2 -11  -3 104.354 11.7530   2
  -2 -11  -3 89.7732 11.5808   1
   2  11   3 71.3983 11.4002   4
  -2  11  -3 81.5478 10.5266   4
  -3 -11  -3 72.3520 10.1165   2
  -3 -11  -3 49.0785 9.13245   1
  -3  11  -3 76.1079 10.3298   4
   3  11   3 73.5494 12.2274   4
  -4 -11  -3 21.3645 6.71195   2
  -4 -11  -3 18.3419 7.15693   1
  -4  11  -3 21.0324 6.44221   4
   4  11   3 27.0609 8.55421   4
  -5 -11  -3 17.0775 7.13516   2
  -5 -11  -3 18.5838 7.49747   1
  -5  11  -3 26.8556 6.87723   4
   5  11   3 18.2744 8.68929   4
   5  11   3 6.76061 5.57038   1
  -6 -11  -3 3.42640 6.02555   2
  -6 -11  -3 -0.3997 6.29306   1
   6  11   3 7.41905 7.01975   4
   6  11   3 4.03250 4.67947   1
  -6  11  -3 2.46419 5.29402   4
  -7 -11  -3 -0.2552 5.22602   1
  -7 -11  -3 17.6138 8.07960   2
   7  11   3 1.27316 6.94475   4
  -7  11  -3 12.6813 6.70870   4
   7  11   3 12.3461 6.09215   1
  -5  12   3 31.2898 9.15358   4
   5  12  -3 22.3471 7.84718   4
   4  12  -3 24.7724 7.96871   4
  -4  12   3 33.2352 9.28849   4
  -3  12   3 10.3823 7.26194   4
   3  12  -3 5.67818 6.00310   4
   2  12  -3 38.3713 8.60423   4
  -2  12   3 37.1828 9.44846   4
   1 -12  -3 44.3553 9.12995   1
  -1  12   3 25.4076 8.25540   4
   1  12  -3 21.5007 7.18462   4
   0 -12  -3 18.3672 8.04333   1
   0  12  -3 24.4127 7.41087   4
   0  12   3 24.5077 8.18367   4
  -1 -12  -3 2.22775 5.36819   1
   1  12   3 6.58632 6.91187   4
  -1  12  -3 5.49620 5.38929   4
  -2 -12  -3 13.8638 9.14874   2
  -2 -12  -3 10.0096 6.79980   1
   2  12   3 20.6130 8.48433   4
  -2  12  -3 22.5922 7.07438   4
  -3 -12  -3 5.86625 6.01565   1
  -3 -12  -3 0.90567 4.57595   2
  -3  12  -3 2.25404 4.44109   4
   3  12   3 0.25712 6.07027   4
  -4 -12  -3 5.96891 7.12697   1
  -4 -12  -3 9.13255 5.85428   2
  -4  12  -3 1.42580 5.33091   4
   4  12   3 0.68784 6.53175   4
  -5 -12  -3 1.62345 6.09363   2
  -5 -12  -3 -1.1508 6.07510   1
   5  12   3 5.29864 6.65413   4
  -5  12  -3 6.58584 5.78000   4
  14   0  -4 231.025 17.5289   1
  13   0  -4 -0.6610 4.82299   1
  12   0  -4 120.964 12.1814   3
  12   0  -4 102.485 12.3808   1
  11   0  -4 0.64017 3.77636   3
  11   0  -4 3.00165 4.57200   1
  10   0  -4 40.5184 7.19005   1
  10   0  -4 39.0211 7.26610   3
   9   0  -4 -0.4252 3.72439   3
   9   0  -4 0.24354 3.58903   1
   8   0  -4 1.18803 3.23713   1
   8   0  -4 7.67132 3.98995   3
   7   0  -4 -2.6974 2.83202   1
   6   0  -4 12.8286 3.60187   1
   5   0  -4 -2.7699 2.08217   1
   5   0  -4 -0.2523 2.90366   3
   4   0  -4 101.904 6.09193   1
   4   0  -4 125.132 7.68789   3
   3   0  -4 -3.6999 1.67614   1
   3   0  -4 -0.2023 2.46320   3
   2   0  -4 14.3862 3.20117   2
   2   0  -4 15.2159 2.43930   1
   2   0  -4 17.7504 3.75055   3
   2   0  -4 20.6081 2.58166   1
   1   0  -4 1.27066 2.34207   2
   1   0  -4 -1.0141 2.58392   3
  -1   0  -4 -0.8060 2.50174   3
  -1   0  -4 8.99803 2.81186   2
  -1   0  -4 -2.4337 1.45338   4
  -2   0  -4 44.0172 4.74455   2
   3   0   4 -1.8462 1.63455   1
  -3   0  -4 -2.1523 1.34331   1
  -3   0  -4 5.09107 2.84769   2
   4   0   4 3.62721 2.42714   1
  -4   0  -4 6.84552 2.09352   1
  -4   0  -4 7.08698 2.28378   1
  -4   0  -4 4.89474 3.00809   2
   4   0   4 6.30216 2.35685   4
   5   0   4 -0.5926 2.17974   1
   5   0   4 -1.2056 1.89437   4
  -5   0  -4 0.56289 2.01673   1
  -5   0  -4 -1.5231 2.09283   1
  -5   0  -4 0.03647 2.94338   2
   6   0   4 872.299 20.7099   1
  -6   0  -4 852.860 18.8176   1
   6   0   4 877.198 19.5650   4
  -6   0  -4 836.432 23.3680   2
  -7   0  -4 0.10996 2.88756   1
   7   0   4 -2.3909 2.51663   4
   7   0   4 0.40845 3.08908   1
  -7   0  -4 -2.7719 3.31969   2
  -8   0  -4 122.374 12.1913   2
  -8   0  -4 110.162 8.36588   1
   8   0   4 117.114 8.62752   4
   8   0   4 122.079 9.68691   1
   9   0   4 -0.1768 3.96586   1
  -9   0  -4 9.04636 5.62873   2
  -9   0  -4 2.39057 3.99291   1
   9   0   4 1.68895 3.70944   4
 -10   0  -4 234.586 12.8741   1
  10   0   4 260.520 15.0573   1
 -10   0  -4 251.366 16.4178   2
  11   0   4 -3.4776 4.44447   1
 -11   0  -4 7.84968 6.21997   2
 -11   0  -4 1.99240 4.21450   1
 -12   0  -4 0.22417 5.51501   2
  12   0   4 -5.2093 5.15885   1
 -12   0  -4 4.53181 4.59931   1
 -13   0  -4 -2.2531 6.15722   2
 -13   0  -4 4.14867 5.03094   1
  13   0   4 2.85879 6.02900   1
 -14   0  -4 22.0814 9.19510   2
 -14   0  -4 23.5069 7.22137   1
  14   0   4 6.40548 7.28552   1
  14  -1  -4 15.4500 7.40542   1
  14   1  -4 3.47271 5.65027   1
  13  -1  -4 53.2152 9.81255   1
  13   1  -4 69.2325 10.5113   1
  12  -1  -4 60.0059 10.6466   1
  12   1  -4 35.3519 7.97441   1
  11  -1  -4 13.3968 5.95286   1
  11   1  -4 13.1003 5.56557   1
  11   1  -4 16.0533 5.12916   3
  10  -1  -4 4.62656 4.28629   1
  10   1  -4 2.42377 3.62028   3
  10   1  -4 4.55918 4.12762   1
   9  -1  -4 49.4032 8.19448   1
   9   1  -4 47.0148 6.80314   3
   9   1  -4 45.5790 7.40933   1
   8  -1  -4 1255.88 30.1681   1
   8   1  -4 1252.02 27.9794   3
   8   1  -4 1284.36 29.4247   1
   7  -1  -4 323.502 13.7294   1
   7   1  -4 330.811 13.1111   1
   7   1  -4 349.139 13.2779   3
   6  -1  -4 446.657 14.8814   1
   6   1  -4 467.105 14.8501   3
   6   1  -4 463.109 14.2772   1
   5  -1  -4 831.144 20.0088   1
   5   1  -4 882.431 19.0726   1
  -5   1   4 892.933 20.9239   4
   5   1  -4 886.095 20.7466   3
   4  -1  -4 4.10136 2.74280   1
   4   1  -4 2.17272 2.64136   3
  -4   1   4 -0.3198 2.36913   4
   4   1  -4 6.14103 2.39817   1
   3  -1  -4 9.10812 2.87572   1
  -3   1   4 8.86091 2.81295   4
   3   1  -4 18.6428 3.98526   3
   3   1  -4 8.97266 2.23709   1
   2  -1  -4 57.5416 5.72250   2
   2  -1  -4 59.0636 4.45369   1
   2   1  -4 63.1018 6.12339   3
  -2   1   4 63.2870 4.80244   4
   1  -1  -4 976.994 20.1048   2
   1  -1  -4 1008.59 17.1764   1
  -1   1   4 1007.11 17.6089   4
   1   1  -4 1029.52 21.0529   3
  -1   1   4 987.437 17.9750   1
   1   1  -4 1007.13 18.3046   2
   0  -1  -4 4279.99 54.3393   1
   0  -1  -4 4171.43 58.8227   2
   0  -1  -4 4196.56 59.0812   3
   0   1   4 4183.72 55.3332   1
   0   1   4 4220.65 54.9900   4
   0   1  -4 4265.97 55.8435   2
   0   1  -4 4274.59 60.2322   3
  -1  -1  -4 9661.44 119.167   1
  -1  -1  -4 9697.51 121.505   3
  -1  -1  -4 9575.06 116.761   1
   1   1   4 9629.16 117.679   4
   1   1   4 9608.70 118.137   1
  -1   1  -4 9699.20 118.621   2
  -2  -1  -4 1958.63 33.1896   2
  -2  -1  -4 1936.49 28.5952   1
  -2  -1  -4 1999.39 31.3472   3
  -2   1  -4 1965.04 26.1801   4
   2   1   4 1961.26 29.4215   4
   2   1   4 1944.55 29.7418   1
  -2   1  -4 1955.52 30.4753   2
  -3  -1  -4 845.061 19.8624   2
  -3  -1  -4 838.016 17.0252   3
  -3  -1  -4 835.827 16.2136   1
   3   1   4 841.696 16.8791   4
   3   1   4 849.042 17.3056   1
  -3   1  -4 845.260 17.0313   4
  -3   1  -4 870.787 18.2875   2
  -4  -1  -4 52.5494 6.11576   2
  -4  -1  -4 44.1751 4.63423   1
  -4   1  -4 45.9070 5.31293   2
   4   1   4 49.5120 5.03683   4
   4   1   4 50.9678 5.59923   1
  -5  -1  -4 -2.7551 2.70047   2
   5  -1   4 -1.4080 1.96880   1
  -5  -1  -4 3.09849 2.63570   1
   5   1   4 2.82668 2.71336   4
   5   1   4 0.70468 2.42971   1
  -5   1  -4 -0.3228 1.57914   1
  -5   1  -4 1.55496 1.77286   1
  -5   1  -4 2.36546 3.04448   2
   6  -1   4 364.211 11.0826   4
   6  -1   4 354.266 12.3077   1
  -6  -1  -4 352.307 15.2331   2
  -6  -1  -4 342.114 12.2983   1
  -6   1  -4 355.616 10.0642   1
   6   1   4 376.763 13.5467   1
  -6   1  -4 347.188 9.67155   1
   6   1   4 332.309 12.2416   4
  -6   1  -4 339.433 14.0104   2
   7  -1   4 466.667 14.0362   4
  -7  -1  -4 456.875 15.3327   1
   7  -1   4 500.698 16.1711   1
  -7  -1  -4 467.974 18.7011   2
   7   1   4 482.498 15.7514   4
  -7   1  -4 482.570 17.9458   2
  -7   1  -4 501.120 13.5674   1
   7   1   4 475.691 16.6168   1
  -7   1  -4 491.821 13.0237   1
  -8  -1  -4 312.439 16.5936   2
   8  -1   4 325.115 14.3501   1
  -8  -1  -4 333.331 13.8354   1
   8  -1   4 316.468 12.5207   4
   8   1   4 307.163 14.4718   1
   8   1   4 287.878 13.3650   4
  -8   1  -4 332.871 12.0307   1
  -8   1  -4 327.519 15.9859   2
  -8   1  -4 316.782 11.3351   1
   9  -1   4 227.319 12.9430   1
  -9  -1  -4 221.361 12.4494   1
  -9  -1  -4 224.528 15.3183   2
   9   1   4 184.384 11.9902   4
   9   1   4 219.181 13.4455   1
  -9   1  -4 239.857 15.1525   2
  -9   1  -4 236.376 11.3127   1
 -10  -1  -4 679.781 27.0359   2
  10  -1   4 665.269 23.2279   1
 -10  -1  -4 672.047 22.1032   1
  10   1   4 668.748 23.9565   1
 -10   1  -4 713.084 26.7082   2
  10   1   4 666.009 29.7180   4
 -10   1  -4 668.032 19.8021   1
 -11  -1  -4 19.5141 7.36706   2
  11  -1   4 17.1587 6.70819   1
 -11  -1  -4 12.4291 5.62038   1
  11   1   4 17.3481 6.50615   1
 -11   1  -4 14.3335 5.38933   1
 -11   1  -4 9.04714 6.57601   2
 -12  -1  -4 30.8677 7.04228   1
  12  -1   4 22.9585 7.81188   1
 -12  -1  -4 17.2819 7.79439   2
 -12   1  -4 29.0511 9.21402   2
 -12   1  -4 30.2801 6.47125   1
  12   1   4 38.9633 8.70467   1
  13  -1   4 44.1630 10.0361   1
 -13  -1  -4 43.6565 8.51000   1
 -13  -1  -4 49.0861 11.5357   2
  13   1   4 42.9537 9.89175   1
 -13   1  -4 39.3881 7.40882   1
 -13   1  -4 42.8296 10.7527   2
 -14  -1  -4 118.819 16.7114   2
 -14  -1  -4 97.6886 12.3992   1
 -14   1  -4 145.398 17.3976   2
  14   1   4 83.0771 13.2750   1
 -14   1  -4 114.229 11.6212   1
  14  -2  -4 56.7123 11.3074   1
  14   2  -4 33.9276 8.51313   1
  14   2  -4 26.6363 8.97950   4
  13  -2  -4 130.696 14.8579   1
  13   2  -4 156.932 15.8390   1
  12  -2  -4 10.5732 6.07315   1
  12   2  -4 7.23984 5.19452   1
  11  -2  -4 20.6356 7.01335   1
  11   2  -4 23.7888 6.77432   1
  10  -2  -4 61.6504 8.54483   1
  10   2  -4 61.6974 8.38939   1
  10   2  -4 89.6841 8.53942   3
   9  -2  -4 43.8994 7.53939   1
   9   2  -4 52.1885 6.79715   3
   9   2  -4 40.1679 7.22894   1
   8  -2  -4 35.6346 6.25926   1
   8   2  -4 29.8146 5.41984   3
   8   2  -4 38.5999 6.26007   1
   7  -2  -4 18.5665 4.82973   1
   7   2  -4 14.2506 3.97115   1
   7   2  -4 13.4677 3.97918   3
  -7   2   4 26.8399 5.63840   4
   6  -2  -4 587.956 17.8778   1
  -6   2   4 583.213 18.0203   4
   6   2  -4 589.073 16.5308   3
   6   2  -4 583.113 15.7851   1
   5  -2  -4 31.4302 5.11213   1
   5   2  -4 32.7900 4.32737   1
   5   2  -4 23.8007 4.35439   3
  -5   2   4 26.9610 5.05522   4
   4  -2  -4 3.40479 3.05296   1
   4   2  -4 2.44752 2.09344   1
  -4   2   4 4.99143 3.05301   4
   4   2  -4 2.68598 2.67259   3
   3  -2  -4 272.921 9.97721   1
   3  -2  -4 306.773 11.5902   2
  -3   2   4 268.311 10.1686   4
   3   2  -4 313.110 11.3490   3
   2  -2  -4 74.6726 5.44557   1
   2  -2  -4 82.7138 6.42511   2
  -2   2   4 72.9057 5.60549   4
   2   2  -4 89.4920 6.47353   3
   1  -2  -4 1.87001 2.63286   2
   1  -2  -4 -0.3964 1.99750   1
  -1   2   4 2.61507 2.22688   1
  -1   2   4 -2.3155 1.97671   4
   0  -2  -4 95.1059 6.58833   2
   0  -2  -4 105.574 5.81821   1
   0   2   4 100.451 5.73675   4
   0   2  -4 106.578 4.46845   2
   0   2   4 101.518 5.91354   1
  -1  -2  -4 315.469 11.1718   2
  -1  -2  -4 321.608 9.57632   1
   1   2   4 297.774 9.65411   1
  -1   2  -4 306.240 7.67339   2
   1   2   4 332.618 10.0794   4
  -2  -2  -4 1727.44 31.7446   2
  -2  -2  -4 1727.84 28.7431   1
  -2  -2  -4 1780.25 28.8958   3
  -2   2  -4 1751.19 26.6072   2
   2   2   4 1780.75 29.5423   1
   2   2   4 1760.03 29.0673   4
  -3  -2  -4 21.6413 3.80227   1
  -3  -2  -4 28.6609 3.72524   3
  -3  -2  -4 19.7623 4.22104   2
  -3   2  -4 25.5820 2.80293   4
  -3   2  -4 29.2997 3.69225   2
   3   2   4 35.7589 4.49925   1
  -3   2  -4 34.9649 3.01894   4
   3   2   4 33.1588 4.43515   4
  -4  -2  -4 105.837 6.82702   1
  -4  -2  -4 115.945 5.57224   3
  -4  -2  -4 103.723 8.01781   2
  -4   2  -4 95.7951 6.46757   2
   4   2   4 103.825 6.84014   4
  -4   2  -4 111.856 5.60751   4
   4   2   4 106.960 7.06166   1
  -5  -2  -4 56.3975 6.27988   1
  -5  -2  -4 48.6503 6.74825   2
   5  -2   4 52.8400 5.18351   1
  -5   2  -4 50.2211 5.22347   4
   5   2   4 71.0250 6.86851   4
  -5   2  -4 55.7466 6.26248   2
   5   2   4 41.4617 5.47827   1
  -6  -2  -4 29.9509 6.09289   2
  -6  -2  -4 32.5787 5.34339   1
   6  -2   4 29.0122 4.74872   1
  -6   2  -4 24.4886 5.12182   2
   6   2   4 29.4990 5.29067   4
   6   2   4 44.7786 6.62788   1
   7  -2   4 455.258 15.1438   1
  -7  -2  -4 427.419 15.7715   1
  -7  -2  -4 440.881 18.6088   2
   7   2   4 422.432 16.2778   1
  -7   2  -4 421.820 10.9204   1
  -7   2  -4 446.056 16.8867   2
   7   2   4 441.345 15.9443   4
  -7   2  -4 427.394 10.7006   1
   8  -2   4 63.6189 7.57923   1
  -8  -2  -4 69.1123 9.74405   2
  -8  -2  -4 59.4509 8.49202   1
  -8   2  -4 77.9209 9.57995   2
   8   2   4 74.9409 8.53976   4
  -8   2  -4 74.2622 6.09554   1
   8   2   4 69.6044 8.82210   1
  -8   2  -4 64.3884 6.11843   1
  -9  -2  -4 75.5202 9.70568   1
   9  -2   4 91.1629 10.1046   1
  -9  -2  -4 88.5653 12.0156   2
   9   2   4 88.0259 9.79066   4
  -9   2  -4 67.7228 9.82433   2
   9   2   4 77.3868 10.4386   1
  -9   2  -4 84.0411 7.45665   1
 -10  -2  -4 104.545 11.3696   1
 -10  -2  -4 105.394 13.3263   2
  10  -2   4 132.582 12.4987   1
  10   2   4 107.218 12.5999   1
  10   2   4 110.445 11.2283   4
 -10   2  -4 112.877 8.19679   1
 -10   2  -4 89.6846 11.6030   2
 -11  -2  -4 99.5614 13.6513   2
  11  -2   4 84.9578 11.2947   1
 -11  -2  -4 87.6041 10.9900   1
 -11   2  -4 110.131 9.60422   1
 -11   2  -4 96.7984 13.3821   2
  11   2   4 106.317 12.6178   1
 -12  -2  -4 43.7464 8.63032   1
 -12  -2  -4 60.8359 12.2017   2
  12   2   4 36.9896 9.41799   1
 -12   2  -4 54.1417 11.0064   2
 -12   2  -4 44.5568 6.97968   1
 -13  -2  -4 -3.8892 5.80702   2
 -13  -2  -4 0.07106 5.04818   1
  13   2   4 -0.9537 5.67540   1
 -13   2  -4 0.45047 6.00621   2
 -13   2  -4 5.26458 4.50545   1
 -14  -2  -4 -0.3647 6.82540   2
 -14  -2  -4 6.24547 6.37354   1
 -14   2  -4 4.34518 7.06092   2
  14   2   4 9.41402 7.02836   1
 -14   2  -4 8.61561 5.06844   1
  14  -3  -4 9.16701 6.58258   1
  14   3  -4 10.9614 7.73483   4
  14   3  -4 18.3321 6.85900   1
  13  -3  -4 7.67654 6.74562   1
  13   3  -4 14.3011 6.17034   1
  13   3  -4 11.3733 7.54258   4
  12  -3  -4 3.01303 5.40403   1
  12   3  -4 3.09075 4.42737   1
  11  -3  -4 38.0102 7.96710   1
  11   3  -4 45.4369 7.90556   1
  10  -3  -4 18.7797 6.79372   1
  10   3  -4 17.4197 5.53325   1
   9  -3  -4 63.7063 9.61527   1
   9   3  -4 68.9149 8.70964   1
   9   3  -4 50.9790 6.53145   3
  -9   3   4 57.9622 9.36700   4
   8  -3  -4 87.0851 9.56866   1
   8   3  -4 119.794 8.97444   1
   8   3  -4 96.1587 7.69263   3
  -8   3   4 110.966 10.9008   4
   7  -3  -4 173.074 11.1290   1
  -7   3   4 139.344 10.3762   4
   7   3  -4 142.427 8.82311   1
   7   3  -4 159.622 8.98890   3
   6  -3  -4 35.6361 6.37370   1
  -6   3   4 21.6056 5.11410   4
   6   3  -4 35.1757 4.82964   1
   5  -3  -4 20.0823 4.40464   1
   5   3  -4 25.9762 3.92671   1
  -5   3   4 18.5632 4.59892   4
   4  -3  -4 426.088 14.0866   1
  -4   3   4 428.191 14.2606   4
   4   3  -4 440.879 10.0018   1
   3  -3  -4 368.065 13.3980   2
   3  -3  -4 345.944 12.1285   1
  -3   3   4 361.925 12.5605   4
   2  -3  -4 565.875 16.0763   2
   2  -3  -4 550.725 14.9373   1
  -2   3   4 548.595 15.1187   4
   1  -3  -4 383.619 11.8772   1
  -1   3   4 380.110 12.0963   4
  -1   3   4 390.089 12.1338   1
   0  -3  -4 133.031 7.15726   1
   0  -3  -4 135.924 7.95894   2
   0   3   4 113.766 6.99623   4
   0   3   4 130.155 7.14127   1
  -1  -3  -4 31.0847 4.83813   2
  -1  -3  -4 23.6979 4.21142   1
   1   3   4 31.2567 4.48081   4
  -1   3  -4 27.5439 2.21307   2
   1   3   4 24.1169 4.34022   1
  -2  -3  -4 1247.51 24.3324   1
  -2  -3  -4 1228.39 26.3722   2
   2   3   4 1214.76 24.2653   4
  -2   3  -4 1204.85 18.6432   2
   2   3   4 1277.37 24.7710   1
  -3  -3  -4 135.769 8.89830   2
  -3  -3  -4 146.633 6.99419   3
  -3  -3  -4 152.850 8.26278   1
   3   3   4 160.964 8.42978   1
   3   3   4 125.031 7.87296   4
  -3   3  -4 144.738 6.00238   2
  -3   3  -4 131.907 5.13627   4
  -4  -3  -4 2.55913 2.75558   1
  -4  -3  -4 -0.1123 2.07823   3
  -4  -3  -4 1.32630 3.27254   2
  -4   3  -4 0.44071 1.92549   4
   4   3   4 4.11966 3.02609   4
  -4   3  -4 0.96800 2.31311   2
   4   3   4 -1.9246 2.42463   1
  -5  -3  -4 172.975 11.0483   2
  -5  -3  -4 160.608 9.60095   1
  -5  -3  -4 172.365 6.02311   3
   5   3   4 164.399 9.58196   4
  -5   3  -4 167.023 8.47694   2
   5   3   4 167.755 9.62983   1
  -5   3  -4 172.146 8.01539   4
   6  -3   4 33.8469 5.15009   1
  -6  -3  -4 49.8266 7.65340   2
  -6  -3  -4 32.0704 6.11151   1
  -6   3  -4 31.4676 5.49387   2
   6   3   4 40.1001 6.61356   1
   6   3   4 47.5637 6.49495   4
  -6   3  -4 35.6688 5.13261   4
  -7  -3  -4 110.894 10.2393   1
   7  -3   4 102.973 7.82733   1
  -7  -3  -4 112.168 11.5151   2
   7   3   4 118.392 10.3253   4
  -7   3  -4 114.201 10.2046   2
  -7   3  -4 97.5674 8.91812   4
   7   3   4 106.585 10.1571   1
  -8  -3  -4 627.952 24.1629   2
   8  -3   4 624.070 19.5972   1
  -8  -3  -4 640.083 21.4506   1
   8   3   4 671.250 22.2153   1
   8   3   4 655.551 21.5384   4
  -8   3  -4 635.122 21.5503   2
   9  -3   4 265.365 14.0836   1
  -9  -3  -4 298.490 15.5569   1
  -9  -3  -4 286.488 17.5757   2
   9   3   4 277.975 15.1513   4
  -9   3  -4 337.243 16.8809   2
   9   3   4 282.251 15.6562   1
 -10  -3  -4 105.556 12.2191   1
 -10  -3  -4 111.727 13.5473   2
 -10   3  -4 114.652 12.7719   2
  10   3   4 80.9780 10.2524   1
  10   3   4 120.000 12.2542   4
 -11  -3  -4 81.6641 12.7103   2
 -11  -3  -4 62.6488 10.1349   1
  11   3   4 58.0030 9.32445   1
 -11   3  -4 54.9713 10.2325   2
 -11   3  -4 64.6571 6.89847   1
 -12  -3  -4 22.1052 8.58480   2
 -12  -3  -4 8.99802 6.19225   1
  12   3   4 18.8819 7.25849   1
 -12   3  -4 35.9989 9.46790   2
 -12   3  -4 11.6047 4.41800   1
 -13  -3  -4 267.995 17.6996   1
 -13  -3  -4 265.945 20.5391   2
 -13   3  -4 208.657 19.7429   2
 -13   3  -4 271.708 12.1989   1
  13  -4  -4 179.347 18.8264   1
  13   4  -4 153.153 14.9473   1
  13   4  -4 199.406 18.5108   4
  12  -4  -4 13.7376 6.37421   1
  12   4  -4 17.2608 7.66887   4
  12   4  -4 16.9023 5.89140   1
  11  -4  -4 45.5933 9.86370   1
  11   4  -4 59.5226 9.01307   1
  11   4  -4 31.2682 7.93285   4
  10  -4  -4 13.2669 6.23869   1
 -10   4   4 14.0007 6.54101   4
  10   4  -4 12.6435 4.85706   1
   9  -4  -4 22.0227 6.16278   1
  -9   4   4 17.2554 6.20509   4
   9   4  -4 13.0649 4.60668   1
   8  -4  -4 440.715 18.5621   1
  -8   4   4 409.750 18.3097   4
   8   4  -4 478.014 16.2329   1
   7  -4  -4 484.479 18.5431   1
  -7   4   4 510.066 19.1475   4
   7   4  -4 510.882 15.6968   1
   6  -4  -4 53.7575 7.62181   1
  -6   4   4 48.6656 7.38831   4
   6   4  -4 57.4680 6.12031   1
   5  -4  -4 27.5096 5.22730   1
  -5   4   4 39.8871 6.22664   4
   5   4  -4 40.2770 4.30223   1
   4  -4  -4 14.0833 4.27426   1
  -4   4   4 12.4518 4.21728   4
   3  -4  -4 165.757 9.30833   1
   3  -4  -4 202.461 10.4694   2
  -3   4   4 179.500 9.76197   4
   2  -4  -4 51.5989 6.18202   2
   2  -4  -4 59.8306 6.73157   1
  -2   4   4 51.0850 6.41349   4
   1  -4  -4 443.887 14.6924   2
   1  -4  -4 436.065 13.9266   1
  -1   4   4 437.043 14.0769   4
  -1   4   4 450.742 14.1944   1
   0  -4  -4 110.751 7.39999   1
   0  -4  -4 124.399 8.06402   2
   0   4   4 119.833 7.96214   4
   0   4   4 121.578 7.69807   1
  -1  -4  -4 1007.17 22.3800   1
  -1  -4  -4 983.236 23.4899   2
   1   4   4 994.652 22.4444   4
   1   4   4 995.085 22.3249   1
  -2  -4  -4 92.9379 7.21801   1
  -2  -4  -4 100.237 7.89077   2
  -2   4  -4 101.059 4.07478   4
   2   4   4 94.4024 8.02133   4
   2   4   4 100.705 7.35028   1
  -3  -4  -4 816.941 22.2000   2
  -3  -4  -4 794.085 20.4904   1
  -3   4  -4 802.976 15.0256   4
   3   4   4 776.580 20.3308   4
   3   4   4 761.904 20.2177   1
  -3   4  -4 803.698 14.2707   2
  -4  -4  -4 111.135 8.40282   1
  -4  -4  -4 104.807 9.97873   2
  -4   4  -4 101.579 5.65828   2
  -4   4  -4 107.980 6.14029   4
   4   4   4 110.330 8.44102   4
   4   4   4 114.017 8.37177   1
  -5  -4  -4 20.2575 3.11076   3
  -5  -4  -4 27.0334 5.77194   2
  -5  -4  -4 9.32611 4.39865   1
   5   4   4 17.0228 4.69043   1
  -5   4  -4 12.8862 3.58837   4
  -5   4  -4 21.2414 4.03769   2
   5   4   4 11.5534 4.33429   4
  -6  -4  -4 85.0391 10.2862   2
  -6  -4  -4 109.543 10.5086   1
   6  -4   4 93.7986 7.10510   1
   6   4   4 90.6173 9.87073   1
   6   4   4 98.5197 9.80095   4
  -6   4  -4 97.4388 7.50957   4
  -6   4  -4 113.636 8.06861   2
  -7  -4  -4 56.6049 8.26107   1
   7  -4   4 76.5731 7.93235   1
  -7  -4  -4 75.3935 10.0920   2
   7   4   4 83.8474 9.38526   4
  -7   4  -4 85.5807 8.33822   4
  -7   4  -4 83.7892 8.83046   2
   7   4   4 83.5485 9.38920   1
  -8  -4  -4 125.445 13.4298   2
  -8  -4  -4 77.3228 10.5094   1
   8   4   4 85.6850 10.3159   4
  -8   4  -4 83.3583 9.12857   4
  -8   4  -4 88.2070 9.75845   2
   8   4   4 77.7140 10.2568   1
  -9  -4  -4 28.6575 8.02342   2
  -9  -4  -4 36.0802 7.38627   1
   9   4   4 25.6526 6.84748   4
   9   4   4 33.1702 7.72258   1
  -9   4  -4 32.5039 7.15731   2
 -10  -4  -4 182.928 13.9894   1
 -10  -4  -4 165.194 16.7637   2
  10   4   4 177.336 13.9445   1
 -10   4  -4 206.300 14.3523   2
  10   4   4 192.189 14.1074   4
 -11  -4  -4 -0.9121 4.91849   1
 -11  -4  -4 4.87245 6.00351   2
  11   4   4 2.59944 4.84990   1
 -11   4  -4 8.34080 6.08073   2
  11   4   4 -0.7286 4.95661   4
 -12  -4  -4 9.39200 6.96269   2
 -12  -4  -4 30.5009 8.71386   1
  12   4   4 20.8878 7.26333   1
 -12   4  -4 25.1064 7.78842   2
 -13  -4  -4 50.4412 9.91270   1
 -13  -4  -4 61.1827 12.4156   2
  13   4   4 59.5683 12.2830   1
 -13   4  -4 48.8746 10.6997   2
  13  -5  -4 4.89077 6.20860   1
  13   5  -4 -3.1626 4.54008   1
  13   5  -4 3.66270 6.33667   4
  12  -5  -4 38.1904 10.0155   1
  12   5  -4 57.3613 10.5421   4
  12   5  -4 34.3406 7.64460   1
  11  -5  -4 121.513 14.3157   1
  11   5  -4 89.6247 10.3512   1
 -11   5   4 127.390 14.9431   4
  11   5  -4 99.6884 12.6222   4
  10  -5  -4 2.84884 5.17714   1
  10   5  -4 2.04718 4.97176   4
  10   5  -4 0.22991 3.95809   1
 -10   5   4 0.37209 4.92942   4
   9  -5  -4 371.237 18.4415   1
   9   5  -4 364.537 18.2774   4
  -9   5   4 380.133 18.9065   4
   9   5  -4 413.839 15.9477   1
   8  -5  -4 48.3072 7.99915   1
   8   5  -4 55.0338 8.17701   4
  -8   5   4 82.9702 10.5437   4
   8   5  -4 66.2125 7.51024   1
   7  -5  -4 49.6456 8.50253   1
  -7   5   4 53.0940 8.45544   4
   7   5  -4 56.8645 6.61723   1
   7   5  -4 39.5662 7.01694   4
   6  -5  -4 35.0872 6.67410   1
   6   5  -4 34.2572 4.70925   1
  -6   5   4 28.3978 6.22583   4
   6   5  -4 33.5446 6.01005   4
   5  -5  -4 51.6114 7.44311   1
   5   5  -4 53.2668 4.57153   1
  -5   5   4 50.3767 7.34260   4
   4  -5  -4 1.25324 3.09620   1
   4   5  -4 0.81411 2.80944   4
  -4   5   4 4.79140 3.71705   4
   3  -5  -4 651.175 19.1988   1
   3  -5  -4 637.236 19.4137   2
   3   5  -4 644.670 16.0957   4
  -3   5   4 647.299 19.5238   4
   2  -5  -4 296.041 12.6042   1
   2  -5  -4 300.233 12.8158   2
  -2   5   4 311.252 13.1545   4
   2   5  -4 315.373 9.98300   4
   1  -5  -4 142.927 9.01255   2
   1  -5  -4 159.292 9.33682   1
  -1  -5   4 157.875 4.73658   2
   1   5  -4 167.137 6.56421   4
  -1   5   4 162.872 9.66003   4
   0  -5  -4 26.3038 5.09608   2
   0  -5  -4 23.0766 4.67947   1
   0   5  -4 27.7977 3.12649   4
   0   5   4 36.6408 6.01946   1
   0   5   4 39.5981 6.16061   4
  -1  -5  -4 43.7666 6.14101   2
  -1  -5  -4 27.6904 5.05579   1
  -1   5  -4 36.3911 3.49043   4
   1   5   4 29.2842 4.95005   1
   1   5   4 36.0928 5.65878   4
  -2  -5  -4 363.872 14.5698   2
  -2  -5  -4 369.517 14.1827   1
   2   5   4 374.897 14.2233   1
   2   5   4 375.783 14.3388   4
  -2   5  -4 375.326 9.55163   4
  -3  -5  -4 510.463 17.9125   2
  -3  -5  -4 493.913 17.0541   1
  -3   5  -4 500.571 12.2961   4
   3   5   4 482.430 16.4030   1
   3   5   4 494.291 16.8100   4
  -4  -5  -4 174.385 10.7525   1
  -4  -5  -4 153.008 10.9456   2
  -4   5  -4 165.924 7.79305   4
   4   5   4 166.705 10.7405   4
  -4   5  -4 163.085 6.46032   2
   4   5   4 197.702 11.1396   1
  -5  -5  -4 194.327 11.9256   1
  -5  -5  -4 196.738 12.7700   2
   5   5   4 205.324 11.8627   4
  -5   5  -4 191.421 9.31928   4
   5   5   4 184.885 11.5897   1
  -5   5  -4 197.980 8.51654   2
  -6  -5  -4 26.3071 6.45612   2
  -6  -5  -4 30.2998 3.27361   3
  -6  -5  -4 36.1353 7.54545   1
  -6   5  -4 19.6789 4.75708   4
   6   5   4 22.9924 5.84684   1
  -6   5  -4 29.9591 5.11389   2
   6   5   4 34.2073 6.83769   4
  -7  -5  -4 216.730 14.8972   2
  -7  -5  -4 227.970 14.1925   1
   7   5   4 226.363 13.8510   4
  -7   5  -4 215.012 11.6826   4
   7   5   4 208.140 13.3603   1
  -7   5  -4 205.163 11.0314   2
  -8  -5  -4 85.8158 11.4570   1
  -8  -5  -4 92.6430 12.2332   2
   8   5   4 104.256 12.3766   1
  -8   5  -4 85.9003 9.05136   4
  -8   5  -4 80.8110 8.94880   2
   8   5   4 75.8718 10.2746   4
  -9  -5  -4 114.159 13.9352   2
  -9  -5  -4 135.293 14.1563   1
  -9   5  -4 127.957 12.0251   2
  -9   5  -4 109.733 10.8574   4
   9   5   4 130.342 13.0063   4
   9   5   4 120.514 12.1566   1
 -10  -5  -4 7.86174 6.56719   2
 -10  -5  -4 -0.6337 4.67186   1
 -10   5  -4 1.19894 5.04182   2
  10   5   4 -1.4603 5.05140   1
  10   5   4 3.77199 5.43279   4
 -11  -5  -4 64.3723 10.1102   1
 -11  -5  -4 75.9899 13.0886   2
  11   5   4 66.9713 10.6231   1
  11   5   4 59.3695 10.4485   4
 -11   5  -4 87.5418 11.9448   2
 -12  -5  -4 19.5014 8.41328   2
 -12  -5  -4 20.4634 7.60334   1
 -12   5  -4 17.5810 7.78745   2
  12   5   4 29.2576 8.85455   1
 -13  -5  -4 -0.5341 6.09474   1
 -13  -5  -4 10.5674 7.72086   2
 -13   5  -4 6.17971 7.10461   2
  13   5   4 6.84550 6.39777   1
  12  -6  -4 69.3525 11.8002   1
 -12  -6   4 51.7791 11.2784   2
 -12   6   4 67.2130 11.9792   4
  12   6  -4 62.1977 9.39690   1
  12   6  -4 78.5390 12.5352   4
 -11  -6   4 -9.0615 5.01566   2
  11  -6  -4 -1.5910 5.63106   1
  11   6  -4 1.40293 4.19108   1
  11   6  -4 5.10541 5.93290   4
 -11   6   4 12.8459 7.03386   4
  10  -6  -4 92.5181 13.5016   1
  10   6  -4 51.9748 7.81015   1
  10   6  -4 45.7526 8.85422   4
 -10   6   4 43.0482 9.07548   4
   9  -6  -4 140.894 13.1690   1
   9   6  -4 165.805 10.7538   1
  -9   6   4 195.900 14.7466   4
   9   6  -4 149.028 13.8109   4
   8  -6  -4 4.46010 4.98800   1
   8   6  -4 2.42338 3.67519   1
  -8   6   4 3.81928 4.86327   4
   8   6  -4 6.21061 4.78049   4
   7  -6  -4 310.747 16.3417   1
  -7   6   4 341.554 17.5222   4
   7   6  -4 320.503 15.6383   4
   7   6  -4 309.480 11.7699   1
   6  -6  -4 72.7894 9.21092   1
   6   6  -4 92.3453 6.12962   1
   6   6  -4 86.2067 9.32476   4
  -6   6   4 77.9972 9.97707   4
   5  -6  -4 9.62436 4.83976   1
  -5  -6   4 4.95213 3.72399   2
   5   6  -4 8.73559 4.03512   4
  -5   6   4 13.5130 5.25298   4
  -4  -6   4 316.692 12.2392   2
   4  -6  -4 336.626 15.0626   1
  -4   6   4 349.737 15.5689   4
   4   6  -4 299.201 12.6159   4
   3  -6  -4 0.63048 3.29342   1
  -3  -6   4 1.53286 2.33697   2
   3  -6  -4 -0.7206 3.28712   2
   3   6  -4 1.81927 2.92047   4
  -3   6   4 -1.0709 3.71068   4
   2  -6  -4 217.595 11.4194   2
  -2  -6   4 206.516 7.15048   2
   2  -6  -4 197.025 11.4816   1
   2   6  -4 219.157 9.34538   4
  -2   6   4 209.742 11.9209   4
   1  -6  -4 -4.1220 2.44990   2
   1  -6  -4 1.23890 3.41770   1
  -1   6   4 -1.1904 3.34707   4
   1   6  -4 1.58611 2.40527   4
   0  -6  -4 874.692 23.5006   2
   0  -6  -4 903.032 23.7995   1
   0   6   4 905.058 24.4570   4
   0   6   4 878.522 23.3896   1
   0   6  -4 880.967 18.0580   4
  -1  -6  -4 5.36517 4.11128   1
  -1  -6  -4 1.43289 3.42301   2
  -1   6  -4 1.12410 2.29984   4
   1   6   4 2.38744 3.74662   4
   1   6   4 -0.7759 3.09251   1
  -2  -6  -4 471.519 17.6073   2
  -2  -6  -4 461.718 17.0847   1
  -2   6  -4 454.298 12.4179   4
   2   6   4 484.287 17.4355   4
   2   6   4 439.719 16.3895   1
  -3  -6  -4 -0.4312 3.75073   2
  -3  -6  -4 3.97411 4.13803   1
  -3   6  -4 2.27527 2.96723   4
   3   6   4 4.70647 4.12891   4
   3   6   4 6.90426 4.13085   1
  -4  -6  -4 71.9690 9.13124   1
  -4  -6  -4 75.5647 9.44426   2
  -4   6  -4 75.9629 4.18035   2
  -4   6  -4 68.1543 6.58366   4
   4   6   4 68.2650 9.21135   4
   4   6   4 68.7205 8.14761   1
  -5  -6  -4 69.3687 9.55458   2
  -5  -6  -4 67.5662 9.75227   1
  -5   6  -4 67.5973 5.77007   2
   5   6   4 62.6606 8.18935   1
   5   6   4 67.3427 9.12163   4
  -5   6  -4 74.8194 7.28998   4
  -6  -6  -4 586.420 23.0764   2
  -6  -6  -4 548.988 13.2798   3
  -6  -6  -4 546.113 21.2763   1
  -6   6  -4 594.388 16.2001   2
   6   6   4 600.104 21.6155   1
   6   6   4 623.982 22.0004   4
  -6   6  -4 627.076 18.7187   4
  -7  -6  -4 88.5720 11.3855   1
  -7  -6  -4 103.421 12.3545   2
   7   6   4 93.0900 10.5318   1
  -7   6  -4 83.5100 9.17002   4
   7   6   4 115.560 12.2881   4
  -7   6  -4 104.624 9.13745   2
  -8  -6  -4 -0.9641 4.25950   1
  -8  -6  -4 0.45390 4.81110   2
  -8   6  -4 -2.8390 3.62738   2
   8   6   4 1.16699 4.67128   1
  -8   6  -4 4.38111 4.17284   4
   8   6   4 3.45272 4.95828   4
  -9  -6  -4 11.9125 6.16416   1
  -9  -6  -4 19.3872 7.55776   2
   9   6   4 21.7713 7.36133   1
  -9   6  -4 11.5341 5.16293   2
  -9   6  -4 24.8224 5.95728   4
   9   6   4 22.4048 7.51275   4
 -10  -6  -4 14.3762 7.48690   2
 -10  -6  -4 33.8888 9.43709   1
  10   6   4 12.6029 6.57839   1
 -10   6  -4 22.1717 6.45948   4
  10   6   4 14.5954 7.07335   4
 -10   6  -4 23.0449 6.98408   2
 -11  -6  -4 0.42432 6.19173   2
 -11  -6  -4 7.42007 6.40587   1
 -11   6  -4 -3.5075 4.64741   2
  11   6   4 -1.0886 6.02468   4
  11   6   4 4.81124 5.44784   1
 -12  -6  -4 27.4834 9.01483   1
 -12  -6  -4 31.0873 10.3630   2
  12   6   4 29.1403 9.07059   1
 -12   6  -4 32.2691 8.93115   2
 -12  -7   4 127.444 16.3603   2
 -12  -7   4 125.121 17.0175   1
  12  -7  -4 149.614 17.6026   1
  12   7  -4 145.190 13.3624   1
 -12   7   4 137.370 16.7020   4
  12   7  -4 103.181 14.6024   4
 -11  -7   4 9.61560 7.92327   1
  11  -7  -4 -1.5806 5.29795   1
 -11  -7   4 8.82633 6.67437   2
  11   7  -4 4.25048 6.33126   4
  11   7  -4 4.80424 4.70410   1
 -11   7   4 2.42507 6.15365   4
  10  -7  -4 294.636 18.5393   1
 -10  -7   4 317.761 22.5634   1
 -10  -7   4 267.333 18.3630   2
  10   7  -4 278.551 13.7362   1
 -10   7   4 262.417 18.1641   4
  10   7  -4 280.523 18.2031   4
  -9  -7   4 9.74935 5.82443   2
   9  -7  -4 10.6579 5.83782   1
   9   7  -4 6.46187 5.36102   4
   9   7  -4 5.13896 3.76013   1
  -9   7   4 -6.8820 4.54004   4
  -8  -7   4 1.42181 4.77440   2
   8  -7  -4 4.62210 4.97344   1
   8   7  -4 3.81762 4.96782   4
  -8   7   4 -1.0764 5.10013   4
   8   7  -4 0.06339 3.12226   1
   7  -7  -4 -2.6044 4.28355   1
  -7  -7   4 -4.6570 3.77289   2
  -7   7   4 -6.7772 4.02204   4
   7   7  -4 2.78502 3.09480   1
   7   7  -4 -0.2747 4.09152   4
   6  -7  -4 500.082 20.7502   1
  -6  -7   4 472.494 18.1410   2
  -6   7   4 478.477 20.3844   4
   6   7  -4 504.870 19.2029   4
   5  -7  -4 13.2053 5.46703   1
  -5  -7   4 6.22952 4.07463   2
   5   7  -4 9.52662 4.51744   4
  -5   7   4 20.9648 6.40480   4
  -4  -7   4 980.283 22.5825   2
   4  -7  -4 986.548 27.7037   1
  -4   7   4 972.110 28.0688   4
   4   7  -4 942.101 24.4393   4
   3  -7  -4 11.1763 4.91621   2
  -3  -7   4 18.8858 3.85198   2
  -3  -7   4 22.2671 5.49463   1
   3  -7  -4 25.6348 5.90781   1
  -3   7   4 16.1674 5.82608   4
   3   7  -4 23.4416 5.26481   4
   2  -7  -4 1161.73 28.9402   2
  -2  -7   4 1261.90 35.5513   1
   2  -7  -4 1189.21 29.9341   1
  -2  -7   4 1175.12 20.5089   2
  -2   7   4 1167.64 30.3781   4
   2   7  -4 1215.42 25.8711   4
   1  -7  -4 190.650 11.6395   2
   1  -7  -4 197.353 12.1204   1
   1   7  -4 183.878 9.26371   4
  -1   7   4 194.203 12.4790   4
   0  -7  -4 67.1299 8.85508   1
   0  -7  -4 68.4632 8.22700   2
   0   7  -4 72.6261 6.68957   4
   0   7   4 70.2983 9.02527   4
  -1  -7  -4 22.1065 5.74945   1
  -1  -7  -4 30.1301 6.01850   2
   1   7   4 19.5494 5.69368   1
  -1   7  -4 27.3260 4.56458   4
   1   7   4 19.5984 5.73733   4
  -2  -7  -4 64.7999 9.20052   1
  -2  -7  -4 59.3501 8.55222   2
   2   7   4 73.6183 9.49133   4
   2   7   4 76.6464 8.71493   1
  -2   7  -4 71.6536 6.81586   4
  -3  -7  -4 1012.66 28.2114   2
  -3  -7  -4 1016.12 28.2936   1
   3   7   4 965.228 27.7038   4
  -3   7  -4 989.830 22.4246   4
   3   7   4 965.313 26.7176   1
  -4  -7  -4 1.44460 4.75956   1
  -4  -7  -4 -0.3144 4.08380   2
   4   7   4 -5.4005 3.74875   4
  -4   7  -4 -3.1202 2.86696   4
   4   7   4 -3.9752 3.73444   1
  -5  -7  -4 57.8360 9.08599   2
  -5  -7  -4 50.4940 8.27054   1
   5   7   4 49.7404 8.26178   4
   5   7   4 45.5679 8.09680   1
  -5   7  -4 65.7159 7.49431   4
  -5   7  -4 55.6430 4.76460   2
  -6  -7  -4 28.0030 7.54743   1
  -6  -7  -4 29.1373 7.90369   2
  -6   7  -4 30.9052 6.14289   4
   6   7   4 33.5426 7.97705   1
  -6   7  -4 40.7987 5.14411   2
   6   7   4 48.6440 8.66471   4
  -7  -7  -4 4.84159 5.09366   1
  -7  -7  -4 -5.2552 4.40844   2
  -7   7  -4 0.34639 3.14458   2
  -7   7  -4 10.1663 4.38915   4
   7   7   4 6.90860 5.23086   4
   7   7   4 -1.4250 4.06900   1
  -8  -7  -4 47.1940 9.62409   2
  -8  -7  -4 46.9907 8.61347   1
   8   7   4 31.9192 7.47562   1
   8   7   4 47.3677 8.97588   4
  -8   7  -4 44.5937 7.05726   2
  -8   7  -4 47.0213 8.02592   4
  -9  -7  -4 35.6897 9.28477   2
  -9  -7  -4 21.6341 7.66523   1
  -9   7  -4 29.3076 7.09167   2
  -9   7  -4 22.0510 6.33260   4
   9   7   4 20.1250 7.67450   4
   9   7   4 19.9488 7.21013   1
 -10  -7  -4 86.8473 12.9630   1
 -10  -7  -4 113.535 15.4679   2
  10   7   4 94.1134 12.9872   1
  10   7   4 115.442 14.2494   4
 -10   7  -4 104.312 12.0305   4
 -11  -7  -4 0.85132 6.33770   2
 -11  -7  -4 -1.0124 5.76264   1
 -11   7  -4 1.37492 5.32289   4
  11   7   4 3.91237 5.75914   1
  11   7   4 -1.2749 6.60238   4
 -11  -8   4 -0.2749 6.06481   2
  11  -8  -4 10.9907 6.68181   1
 -11   8   4 1.74410 6.30868   4
  11   8  -4 0.67578 6.86143   4
  11   8  -4 5.98269 4.54122   1
  10  -8  -4 24.1551 8.04798   1
 -10  -8   4 28.2825 8.31781   2
  10   8  -4 42.1057 9.54210   4
  10   8  -4 29.6797 5.98646   1
 -10   8   4 35.1053 9.05418   4
   9  -8  -4 40.1768 9.94515   1
  -9  -8   4 41.8695 9.31431   2
   9   8  -4 41.1576 6.53263   1
   9   8  -4 42.3012 9.02473   4
  -9   8   4 45.0479 9.72543   4
  -8  -8   4 16.9426 6.49103   2
   8  -8  -4 33.6447 8.31966   1
   8   8  -4 21.5821 7.31905   4
  -8   8   4 18.9310 7.14332   4
   8   8  -4 20.8715 4.49966   1
  -7  -8   4 0.11558 4.25895   2
   7  -8  -4 3.05627 5.49930   1
   7   8  -4 3.15434 4.70022   4
  -7   8   4 -1.5599 5.43941   4
   6  -8  -4 -1.2556 4.28858   1
  -6  -8   4 4.37665 3.96589   2
   6   8  -4 6.27294 4.77322   4
  -6   8   4 1.11658 5.29850   4
   5  -8  -4 17.9471 6.22647   1
  -5  -8   4 16.2092 4.67149   2
  -5   8   4 12.8254 6.01658   4
   5   8  -4 27.2030 6.51676   4
   4  -8  -4 95.9396 10.5557   1
  -4  -8   4 97.3469 8.28024   2
  -4   8   4 99.1575 11.5398   4
   4   8  -4 89.7350 9.56275   4
  -3  -8   4 3.41528 2.86593   2
   3  -8  -4 10.5273 5.33880   1
   3  -8  -4 6.58537 4.33487   2
  -3   8   4 3.22562 5.53867   4
   3   8  -4 8.03645 4.21133   4
   2  -8  -4 147.535 14.4942   1
   2  -8  -4 130.370 10.3760   2
  -2  -8   4 144.799 8.36540   2
   2   8  -4 146.085 9.81360   4
  -2   8   4 152.244 13.9666   4
   1  -8  -4 736.525 23.1500   2
  -1   8   4 744.198 25.0385   4
   1   8  -4 768.175 20.5856   4
   0  -8  -4 4.74289 4.08322   2
   0  -8  -4 -2.1461 4.08386   1
   0   8  -4 1.54587 3.35234   4
   0   8   4 -6.1414 3.66457   4
  -1  -8  -4 321.905 16.4790   1
  -1  -8  -4 330.375 15.9571   2
   1   8   4 312.147 15.2601   1
   1   8   4 306.526 16.1459   4
  -1   8  -4 333.882 13.1061   4
  -2  -8  -4 203.312 12.9753   2
  -2  -8  -4 227.152 14.1727   1
   2   8   4 241.464 15.0471   4
  -2   8  -4 218.051 10.8603   4
   2   8   4 238.781 13.6752   1
  -3  -8  -4 -6.6164 3.95151   1
  -3  -8  -4 1.88968 4.71824   2
  -3   8  -4 -0.9012 3.14615   4
   3   8   4 1.99893 4.77644   4
   3   8   4 1.62532 4.17373   1
  -4  -8  -4 380.053 18.5307   1
  -4  -8  -4 367.332 18.2113   2
  -4   8  -4 346.569 14.4193   4
   4   8   4 384.125 18.8281   4
   4   8   4 344.832 16.8130   1
  -5  -8  -4 118.643 13.0769   1
  -5  -8  -4 155.653 14.6325   2
  -5   8  -4 126.409 10.8746   4
   5   8   4 109.924 11.8349   1
   5   8   4 118.574 12.8839   4
  -6  -8  -4 186.020 14.2361   1
  -6  -8  -4 204.179 14.9250   2
   6   8   4 200.885 13.8432   1
  -6   8  -4 182.624 11.9982   4
   6   8   4 167.918 15.2710   4
  -7  -8  -4 75.2406 11.9272   2
  -7  -8  -4 57.2233 9.27044   1
   7   8   4 56.5727 9.99247   1
   7   8   4 41.5667 9.14627   4
  -7   8  -4 63.9593 8.75133   4
  -8  -8  -4 3.71524 5.55677   2
  -8  -8  -4 -7.0045 3.92517   1
   8   8   4 -2.2361 4.97706   4
   8   8   4 -1.2673 4.30958   1
  -8   8  -4 1.56843 4.22109   4
  -9  -8  -4 68.0751 12.3182   2
  -9  -8  -4 94.8540 13.5857   1
   9   8   4 100.815 13.7566   4
  -9   8  -4 88.3071 11.5023   4
   9   8   4 81.6558 12.3316   1
 -10  -8  -4 90.3454 14.3627   2
 -10  -8  -4 42.9691 10.6491   1
 -10   8  -4 58.4674 9.98531   4
  10   8   4 72.3764 12.6911   4
  10   8   4 54.9432 10.4226   1
 -11  -8  -4 11.0423 7.95369   2
 -11  -8  -4 22.9818 9.48339   1
 -11   8  -4 18.6979 7.22411   4
  11   8   4 24.9180 9.39706   4
  11   8   4 14.2051 7.24201   1
 -10  -9   4 30.7115 8.71483   2
  10  -9  -4 69.4637 13.4776   1
  10   9  -4 26.3678 8.75500   4
 -10   9   4 29.7693 9.49114   4
  10   9  -4 27.1553 5.50285   1
  -9  -9   4 32.7801 8.48026   2
   9  -9  -4 28.7777 8.68787   1
  -9   9   4 25.8900 8.90213   4
   9   9  -4 34.3521 9.15779   4
   8  -9  -4 448.943 22.6858   1
  -8  -9   4 446.143 20.2928   2
   8   9  -4 473.016 22.3789   4
  -8   9   4 445.905 22.9540   4
   7  -9  -4 54.9333 10.0183   1
  -7  -9   4 59.7243 9.26348   2
   7   9  -4 69.3118 10.4904   4
  -7   9   4 71.0394 11.3695   4
  -6  -9   4 129.691 11.5067   2
   6  -9  -4 129.045 14.4891   1
   6   9  -4 109.688 12.4521   4
  -6   9   4 112.569 13.3510   4
  -5  -9   4 172.306 11.6229   2
   5  -9  -4 202.877 14.8204   1
   5   9  -4 168.181 12.5323   4
  -5   9   4 147.165 14.9644   4
   4  -9  -4 611.910 23.7323   1
   4   9  -4 552.324 20.6935   4
  -4   9   4 530.378 22.6675   4
   3  -9  -4 145.169 11.4619   2
   3  -9  -4 176.568 13.4887   1
   3   9  -4 171.911 11.7521   4
  -3   9   4 184.993 13.8539   4
   2  -9  -4 50.8234 8.61919   1
   2  -9  -4 62.7700 8.93835   2
   2   9  -4 52.0819 7.82508   4
  -2   9   4 53.4972 8.97394   4
   1  -9  -4 159.872 11.6121   2
   1  -9  -4 159.050 12.7494   1
  -1   9   4 193.402 14.0588   4
   1   9  -4 174.602 11.1608   4
   0  -9  -4 146.403 13.9210   1
   0  -9  -4 142.226 11.2353   2
   0   9  -4 135.196 11.1500   4
   0   9   4 139.577 13.5487   4
  -1  -9  -4 307.386 15.7689   2
  -1  -9  -4 285.660 16.2323   1
   1   9   4 321.889 17.6224   4
  -1   9  -4 321.301 14.0378   4
  -2  -9  -4 319.618 17.3558   1
  -2  -9  -4 327.054 16.3645   2
   2   9   4 320.600 17.5790   4
  -2   9  -4 300.759 13.9291   4
   2   9   4 298.066 15.7676   1
  -3  -9  -4 12.3420 6.63491   1
  -3  -9  -4 15.0567 6.15862   2
   3   9   4 13.6783 5.70825   1
   3   9   4 14.9110 6.53510   4
  -3   9  -4 8.42896 4.42008   4
  -4  -9  -4 100.009 11.9554   1
  -4  -9  -4 112.510 12.4329   2
  -4   9  -4 126.421 11.1051   4
   4   9   4 109.914 12.1391   1
   4   9   4 106.685 12.5549   4
  -5  -9  -4 41.2443 9.05906   2
  -5  -9  -4 39.2836 8.12574   1
   5   9   4 36.4702 8.49039   4
   5   9   4 56.4235 9.17041   1
  -5   9  -4 48.1672 7.51477   4
  -6  -9  -4 15.3021 6.85889   2
  -6  -9  -4 16.7863 6.53386   1
   6   9   4 26.7123 7.95733   4
   6   9   4 13.2976 5.51278   1
  -6   9  -4 18.5589 5.69787   4
  -7  -9  -4 10.1842 6.53556   1
  -7  -9  -4 6.17392 5.91570   2
  -7   9  -4 7.62926 5.02836   4
   7   9   4 2.10836 5.84287   4
   7   9   4 9.67528 5.91814   1
  -8  -9  -4 133.526 16.0986   2
  -8  -9  -4 91.4158 12.8730   1
  -8   9  -4 127.490 13.0996   4
   8   9   4 115.172 13.7973   1
   8   9   4 110.636 14.3443   4
  -9  -9  -4 9.08691 7.39441   2
  -9  -9  -4 8.41185 6.39745   1
   9   9   4 6.94680 5.61219   1
   9   9   4 19.0619 8.42650   4
  -9   9  -4 14.7323 6.68494   4
 -10  -9  -4 16.5980 8.49867   2
 -10  -9  -4 2.50940 7.18864   1
  10   9   4 7.99782 7.31497   4
  10   9   4 11.1101 6.52747   1
 -10   9  -4 10.3168 6.51706   4
   9 -10  -4 -0.0315 6.53418   1
  -9  10   4 7.90987 7.94000   4
   9  10  -4 2.78599 6.50510   4
   8 -10  -4 19.1834 7.99011   1
   8  10  -4 22.6339 8.06843   4
  -8  10   4 14.3873 7.77965   4
   7 -10  -4 66.0187 11.2972   1
   7  10  -4 59.8140 10.5967   4
  -7  10   4 58.8267 11.1230   4
   6 -10  -4 -2.9584 4.89473   1
   6  10  -4 2.66232 5.16702   4
  -6  10   4 -13.095 4.48995   4
   5 -10  -4 6.68308 5.64107   1
   5  10  -4 3.10094 4.67983   4
  -5  10   4 -2.6496 5.07650   4
   4 -10  -4 0.39188 4.56073   1
  -4  10   4 2.96527 5.39942   4
   4  10  -4 1.97624 4.68440   4
   3 -10  -4 75.9663 11.8514   1
   3 -10  -4 94.3388 11.4000   2
  -3  10   4 62.1702 10.4362   4
   3  10  -4 68.4927 9.40523   4
   2 -10  -4 92.3026 12.9724   1
   2 -10  -4 100.483 11.2499   2
   2  10  -4 93.8150 10.4746   4
  -2  10   4 90.1391 11.7408   4
   1 -10  -4 22.9740 7.42923   1
   1 -10  -4 9.49991 5.15838   2
  -1  10   4 2.16046 5.59261   4
   1  10  -4 12.2528 5.16445   4
   0 -10  -4 18.0556 6.15580   2
   0 -10  -4 21.4130 7.74635   1
   0  10  -4 15.6880 5.49118   4
   0  10   4 8.51042 6.36178   4
  -1 -10  -4 4.67946 4.83537   2
  -1 -10  -4 -2.1300 4.38048   1
   1  10   4 2.32840 5.12135   4
  -1  10  -4 -5.0719 3.63600   4
  -2 -10  -4 0.90786 4.72393   1
  -2 -10  -4 -2.7180 4.07503   2
   2  10   4 10.1006 6.14626   4
  -2  10  -4 -2.9460 3.46639   4
  -3 -10  -4 27.1814 8.13853   1
  -3 -10  -4 15.4372 6.40658   2
   3  10   4 25.9633 8.05426   4
  -3  10  -4 32.7775 6.89684   4
   3  10   4 30.4705 7.59234   1
  -4 -10  -4 1.63947 5.14535   2
  -4 -10  -4 4.13488 5.65212   1
   4  10   4 -1.8499 5.33904   4
   4  10   4 3.57964 4.87779   1
  -4  10  -4 0.31989 4.37886   4
  -5 -10  -4 -1.2665 5.12271   2
  -5 -10  -4 5.86227 5.39101   1
   5  10   4 0.65679 6.19890   4
  -5  10  -4 1.35983 4.13609   4
   5  10   4 5.02924 5.34996   1
  -6 -10  -4 2.70120 5.89567   2
  -6 -10  -4 3.96870 6.49316   1
   6  10   4 7.87585 5.75380   1
  -6  10  -4 -4.1588 4.13533   4
   6  10   4 2.70047 6.15782   4
  -7 -10  -4 14.0793 7.05681   2
  -7 -10  -4 17.3377 8.12243   1
   7  10   4 8.85976 5.99201   1
  -7  10  -4 20.4365 6.86731   4
   7  10   4 11.9861 7.95308   4
  -8 -10  -4 4.99351 5.81357   2
  -8 -10  -4 7.72146 6.85891   1
   8  10   4 -2.6769 4.48016   1
  -8  10  -4 3.39889 4.96417   4
   8  10   4 9.67905 8.11495   4
   7 -11  -4 105.082 14.5164   1
   7  11  -4 104.212 13.7251   4
  -7  11   4 114.520 15.5454   4
   6 -11  -4 80.7684 12.4496   1
  -6  11   4 75.6074 12.5995   4
   6  11  -4 67.5151 10.7856   4
   5 -11  -4 98.6207 14.0920   1
  -5  11   4 101.574 14.2025   4
   5  11  -4 91.7977 11.9699   4
   4 -11  -4 240.901 17.1951   1
   4  11  -4 233.377 15.6796   4
  -4  11   4 257.512 18.4906   4
   3 -11  -4 145.709 13.4756   2
   3 -11  -4 171.176 16.3811   1
  -3  11   4 150.842 15.6356   4
   3  11  -4 184.047 13.7971   4
   2 -11  -4 50.3645 8.69502   2
   2 -11  -4 27.4171 8.29733   1
   2  11  -4 45.1329 8.33526   4
  -2  11   4 23.7512 8.05479   4
   1 -11  -4 117.607 14.7044   1
   1 -11  -4 129.938 13.0407   2
  -1  11   4 119.803 14.3882   4
   1  11  -4 111.897 11.7395   4
   0 -11  -4 4.37755 4.97646   1
   0 -11  -4 4.32482 4.98878   2
   0  11   4 13.9315 7.16676   4
   0  11  -4 1.38623 4.64080   4
  -1 -11  -4 7.53777 5.63760   2
  -1 -11  -4 9.33722 5.92168   1
   1  11   4 9.20981 6.67054   4
  -1  11  -4 1.43678 4.05317   4
  -2 -11  -4 -1.3719 4.43960   2
  -2 -11  -4 -4.1772 4.24225   1
  -2  11  -4 0.64708 4.15876   4
   2  11   4 -8.5925 4.77729   4
  -3 -11  -4 89.4890 11.7380   2
  -3 -11  -4 73.9499 10.9916   1
   3  11   4 96.8938 13.7657   4
  -3  11  -4 78.5796 10.3269   4
  -4 -11  -4 1.46214 5.06612   2
  -4 -11  -4 5.34693 5.55136   1
  -4  11  -4 2.00906 4.91643   4
   4  11   4 -4.6112 3.93629   1
   4  11   4 9.32544 7.15647   4
  -5 -11  -4 198.047 15.8399   2
   5  11   4 201.930 19.1590   4
  -5  11  -4 207.813 14.4405   4
   5  11   4 209.699 15.2753   1
  -6 -11  -4 27.6588 8.50737   2
  -6 -11  -4 43.5910 10.9657   1
  -6  11  -4 50.5738 9.10337   4
   6  11   4 31.4650 8.29690   1
   6  11   4 28.4393 9.93393   4
  -7 -11  -4 -2.0583 6.24734   2
  -7 -11  -4 2.47144 5.78925   1
   7  11   4 -0.9087 6.67866   4
   7  11   4 3.16874 5.74582   1
  -7  11  -4 -6.5635 3.82947   4
   4 -12  -4 18.2595 8.99850   1
  -4  12   4 16.5531 8.06278   4
   4  12  -4 20.0527 7.18604   4
   3 -12  -4 0.23695 6.52623   1
   3  12  -4 0.29788 5.36186   4
  -3  12   4 6.28172 7.12068   4
   2 -12  -4 29.9318 9.15137   1
   2  12  -4 28.0467 7.62993   4
  -2  12   4 31.6530 9.62125   4
   1 -12  -4 -3.2358 5.48762   1
  -1  12   4 1.51301 6.07796   4
   1  12  -4 3.87368 4.91754   4
   0 -12  -4 98.7497 11.9736   2
   0 -12  -4 82.0079 13.4692   1
   0  12   4 96.2447 13.6511   4
   0  12  -4 76.8244 10.9052   4
  -1 -12  -4 3.46373 5.33440   1
  -1 -12  -4 -4.3173 4.67692   2
  -1  12  -4 2.54310 5.15420   4
   1  12   4 2.17655 6.73737   4
  -2 -12  -4 4.69347 5.72305   2
  -2 -12  -4 -5.4368 4.95905   1
   2  12   4 20.4587 8.60266   4
  -2  12  -4 24.8246 7.28569   4
  -3 -12  -4 65.5130 10.9239   2
   3  12   4 55.2129 11.3116   4
  -3  12  -4 55.7755 9.55398   4
  -4 -12  -4 30.3726 8.24317   1
  -4 -12  -4 64.8790 10.8538   2
   4  12   4 32.3376 10.1955   4
  -4  12  -4 45.1774 9.05109   4
  14   0  -5 -3.1353 4.90981   1
  13   0  -5 110.175 13.9630   1
  12   0  -5 1.18239 4.64359   3
  12   0  -5 -5.3173 3.80663   1
  11   0  -5 5.22043 4.71141   1
  11   0  -5 20.9921 6.21884   3
  10   0  -5 1.58837 4.01007   1
  10   0  -5 5.13511 4.19097   3
   9   0  -5 2.99048 4.18049   3
   9   0  -5 -2.1976 4.06221   1
   8   0  -5 0.94775 3.29445   1
   8   0  -5 -4.6137 3.48478   3
   7   0  -5 102.311 9.72789   1
   7   0  -5 84.6817 9.07550   3
   6   0  -5 -0.5090 3.20140   3
   6   0  -5 5.15881 3.25652   1
   5   0  -5 712.895 19.8536   3
   5   0  -5 683.472 16.8095   1
   4   0  -5 3.29454 3.24006   3
   4   0  -5 0.48741 2.17862   1
   3   0  -5 227.867 10.5660   3
   3   0  -5 219.839 7.26438   1
   3   0  -5 217.220 7.55804   1
   2   0  -5 -4.1333 2.06670   2
   2   0  -5 -0.1091 1.47964   1
   2   0  -5 -2.4242 2.70560   3
   2   0  -5 1.17707 1.44567   1
   1   0  -5 115.955 7.57153   3
   1   0  -5 104.867 6.44053   2
   0   0  -5 -0.8890 2.30059   2
   0   0  -5 -0.7334 2.99393   3
   0   0  -5 -3.0765 1.71935   4
  -1   0  -5 1678.88 29.1546   2
  -1   0  -5 1712.08 25.2461   4
  -1   0  -5 1676.42 30.5744   3
  -2   0  -5 -0.7955 2.42726   3
  -2   0  -5 0.71514 2.50556   2
  -3   0  -5 813.863 19.3994   2
   4   0   5 1.15659 2.07848   1
  -4   0  -5 0.09957 2.64648   2
  -5   0  -5 103.790 5.08543   1
   5   0   5 110.194 6.99497   4
  -5   0  -5 105.153 5.25169   1
  -5   0  -5 103.210 8.16830   2
   5   0   5 101.791 6.80795   1
  -6   0  -5 1.17270 2.33569   1
  -6   0  -5 0.68945 2.35584   1
   6   0   5 -2.2738 2.40228   4
   6   0   5 0.08867 2.71060   1
  -6   0  -5 2.54265 3.74878   2
   7   0   5 281.033 12.6254   1
   7   0   5 267.000 11.0227   4
  -7   0  -5 263.806 9.83119   1
  -7   0  -5 263.563 10.1797   1
  -7   0  -5 281.822 14.5068   2
  -8   0  -5 -3.7504 2.84154   1
   8   0   5 5.51024 3.43931   4
  -8   0  -5 1.28611 3.05320   1
   8   0   5 0.44968 3.47360   1
  -8   0  -5 2.20498 4.32917   2
   9   0   5 91.0547 9.97812   1
  -9   0  -5 72.8280 7.87706   1
  -9   0  -5 64.0467 9.93395   2
 -10   0  -5 0.30127 5.50980   2
  10   0   5 -7.4494 3.50706   1
 -10   0  -5 -3.0008 3.55401   1
 -11   0  -5 272.346 13.7142   1
  11   0   5 228.118 15.7912   1
 -11   0  -5 275.178 18.6573   2
  12   0   5 -4.7562 5.25874   1
 -12   0  -5 -3.7571 4.11376   1
 -12   0  -5 -8.3302 4.85410   2
 -13   0  -5 170.669 18.3820   2
 -13   0  -5 176.107 12.6273   1
  14  -1  -5 2.74844 6.15642   1
  14   1  -5 -0.5282 5.14647   1
  13  -1  -5 121.807 15.1650   1
  13   1  -5 97.8512 12.3789   1
  12  -1  -5 4.16362 5.90593   3
  12  -1  -5 25.0068 7.88383   1
  12   1  -5 23.5268 6.63830   1
  11  -1  -5 205.729 14.0880   1
  11   1  -5 191.841 12.2620   3
  11   1  -5 178.929 13.0827   1
  10  -1  -5 73.1255 8.94875   1
  10   1  -5 65.7067 9.36335   1
  10   1  -5 61.0459 8.29714   3
   9  -1  -5 281.093 14.7683   1
   9   1  -5 290.151 13.8572   3
   9   1  -5 302.233 14.4021   1
   8  -1  -5 202.032 11.9713   1
   8   1  -5 201.892 11.4894   3
   8   1  -5 215.934 11.5722   1
   7  -1  -5 629.982 19.1886   1
   7   1  -5 605.683 17.8470   1
   7   1  -5 637.229 19.4567   3
   6  -1  -5 906.920 22.2578   1
   6   1  -5 897.926 20.6934   1
   6   1  -5 923.866 23.2249   3
   5  -1  -5 48.1650 5.46800   1
   5   1  -5 48.2435 6.23819   3
   5   1  -5 50.3783 5.26336   1
  -5   1   5 56.6594 6.41769   4
   4  -1  -5 17.9334 3.73303   1
   4   1  -5 15.8009 4.24493   3
   4   1  -5 18.3026 3.14475   1
  -4   1   5 16.2376 3.70952   4
   3  -1  -5 171.795 7.41858   1
  -3   1   5 190.669 8.06460   4
   3   1  -5 177.937 9.55109   3
   2  -1  -5 120.946 5.74323   1
   2  -1  -5 111.519 7.94868   3
   2  -1  -5 124.406 7.55882   2
  -2   1   5 116.069 5.96925   4
   2   1  -5 124.107 7.81512   3
   1  -1  -5 72.6041 4.71626   1
   1  -1  -5 79.2047 4.53252   1
   1  -1  -5 80.9530 6.91565   2
   1  -1  -5 70.7004 6.95722   3
  -1   1   5 82.8597 5.25908   1
   1   1  -5 79.0138 5.36573   2
  -1   1   5 79.2638 4.83306   4
   1   1  -5 83.6286 6.46845   3
   1   1  -5 82.4639 3.69865   4
   0  -1  -5 923.466 15.5170   1
   0  -1  -5 919.031 15.5349   1
   0  -1  -5 941.251 20.4849   2
   0  -1  -5 958.989 21.2875   3
   0   1   5 920.562 17.2901   1
   0   1   5 916.739 16.5926   4
   0   1  -5 916.980 21.3484   3
   0   1  -5 891.249 18.0039   2
   0   1  -5 924.731 13.1343   4
  -1  -1  -5 4.52409 2.01997   1
  -1  -1  -5 8.72820 1.97189   1
  -1  -1  -5 7.55347 3.16405   2
  -1  -1  -5 5.13002 3.05413   3
  -1   1  -5 12.5563 1.43004   4
   1   1   5 4.99141 2.04134   4
   1   1   5 8.64733 2.47544   1
  -1   1  -5 7.99746 2.57865   2
  -2  -1  -5 13.7961 3.75687   2
  -2  -1  -5 10.4677 3.31944   3
  -2  -1  -5 9.75811 2.23174   1
  -2  -1  -5 14.1444 2.38738   1
  -2   1  -5 5.86130 2.70583   2
  -2   1  -5 10.3044 1.86625   4
   2   1   5 7.91075 2.47985   1
   2   1   5 11.7554 2.52261   4
  -3  -1  -5 58.7098 4.17767   1
  -3  -1  -5 61.3368 4.37193   1
  -3  -1  -5 63.3054 5.95548   3
  -3  -1  -5 57.5575 6.52089   2
  -3   1  -5 73.7643 5.75268   2
   3   1   5 66.7974 5.14607   1
  -3   1  -5 57.6483 4.04013   4
   3   1   5 63.8309 4.74457   4
  -4  -1  -5 33.5327 3.74280   1
  -4  -1  -5 33.1539 5.42847   2
  -4  -1  -5 42.5810 4.48647   1
   4   1   5 44.9656 4.74735   4
   4   1   5 39.1044 4.76107   1
  -4   1  -5 51.2833 6.10547   2
   5  -1   5 1286.01 24.1659   1
  -5  -1  -5 1294.41 30.0469   2
  -5  -1  -5 1318.94 24.3731   1
   5   1   5 1326.00 26.5549   1
   5   1   5 1307.28 25.1622   4
  -5   1  -5 1292.21 28.0598   2
  -6  -1  -5 553.687 15.2257   1
   6  -1   5 539.740 15.5981   1
  -6  -1  -5 542.061 19.4641   2
  -6   1  -5 542.734 18.0540   2
   6   1   5 550.587 15.8690   4
   6   1   5 542.355 16.9410   1
   7  -1   5 40.4486 6.36181   1
  -7  -1  -5 39.0621 5.86731   1
  -7  -1  -5 42.8812 7.58422   2
  -7   1  -5 39.2528 4.20441   1
  -7   1  -5 35.2355 6.96189   2
   7   1   5 47.0673 6.29803   4
   7   1   5 41.3331 6.64224   1
  -8  -1  -5 89.2378 10.8046   2
   8  -1   5 103.858 9.63578   1
  -8  -1  -5 86.5402 8.39905   1
  -8   1  -5 86.8926 6.08794   1
   8   1   5 95.0285 9.77566   1
  -8   1  -5 96.4016 6.58986   1
  -8   1  -5 84.5720 10.1302   2
   8   1   5 99.3869 9.23948   4
  -9  -1  -5 244.851 16.0607   2
  -9  -1  -5 283.542 13.4991   1
   9  -1   5 249.001 13.7517   1
  -9   1  -5 250.604 10.5616   1
   9   1   5 253.161 14.6497   1
  -9   1  -5 271.664 16.0790   2
  10  -1   5 49.0146 8.45125   1
 -10  -1  -5 48.5209 9.47448   2
 -10  -1  -5 63.7578 8.39302   1
 -10   1  -5 52.7682 6.46253   1
  10   1   5 50.6246 9.30357   1
 -10   1  -5 55.7208 9.87349   2
 -11  -1  -5 46.1155 9.96109   2
 -11  -1  -5 46.2996 8.12383   1
 -11   1  -5 62.6103 10.9006   2
  11   1   5 62.0509 10.4645   1
 -11   1  -5 43.4868 6.54795   1
 -12  -1  -5 141.929 16.6207   2
 -12  -1  -5 138.628 12.7816   1
 -12   1  -5 157.360 16.8428   2
  12   1   5 157.326 15.8762   1
 -12   1  -5 155.629 10.5272   1
 -13  -1  -5 9.16387 6.99567   2
 -13  -1  -5 2.79999 5.32351   1
  13   1   5 6.63391 7.13724   1
 -13   1  -5 10.7082 5.10499   1
 -13   1  -5 9.88650 6.57987   2
  14  -2  -5 140.613 15.6868   1
  14   2  -5 124.823 14.8427   1
  13  -2  -5 25.6559 8.24972   1
  13   2  -5 12.7812 6.41359   1
  12  -2  -5 74.2376 11.4542   1
  12   2  -5 75.7494 10.9380   1
  11  -2  -5 204.229 14.7281   1
  11   2  -5 222.721 14.0679   1
  11   2  -5 215.048 12.8659   3
  10  -2  -5 37.7354 7.47944   1
  10   2  -5 53.1558 7.57905   3
  10   2  -5 56.7185 8.15967   1
   9  -2  -5 1.73275 4.70425   1
   9   2  -5 3.40331 4.06164   1
   9   2  -5 -1.6507 3.09221   3
   8  -2  -5 16.8983 5.84792   1
   8   2  -5 20.6893 5.28655   1
   8   2  -5 14.1943 4.91337   3
   7  -2  -5 46.3796 6.57736   1
   7   2  -5 40.4811 6.32164   3
  -7   2   5 62.4622 8.30112   4
   7   2  -5 51.8216 6.21656   1
   6  -2  -5 107.464 8.33056   1
   6   2  -5 110.766 8.10235   3
   6   2  -5 108.517 6.91661   1
  -6   2   5 109.204 9.55065   4
   5  -2  -5 219.072 10.4167   1
  -5   2   5 209.035 10.4379   4
   5   2  -5 216.342 8.14920   1
   5   2  -5 225.343 10.8257   3
   4  -2  -5 55.3414 6.22028   1
   4   2  -5 44.5176 3.50131   1
   4   2  -5 54.6206 6.62793   3
  -4   2   5 39.0570 5.44514   4
   3  -2  -5 920.007 22.8387   2
   3  -2  -5 966.048 20.6456   1
   3   2  -5 941.351 22.7621   3
  -3   2   5 974.756 21.1840   4
   2  -2  -5 27.1385 4.85779   2
   2  -2  -5 32.2590 4.41001   1
  -2   2   5 29.3340 4.31656   4
   2   2  -5 30.1031 4.98406   3
   1  -2  -5 469.009 14.6884   2
   1  -2  -5 445.124 12.1083   1
  -1   2   5 493.259 12.8712   4
  -1   2   5 472.350 13.1001   1
   0  -2  -5 684.485 15.0563   1
   0  -2  -5 691.359 17.9773   2
   0   2  -5 678.181 13.8519   2
   0   2   5 685.063 15.5380   4
   0   2   5 680.274 15.7930   1
  -1  -2  -5 3741.12 56.1387   3
  -1  -2  -5 3805.16 52.8617   1
  -1  -2  -5 3769.52 57.6073   2
  -1   2  -5 3898.62 51.3656   2
   1   2   5 3808.31 54.0531   1
   1   2   5 3762.50 53.3489   4
  -2  -2  -5 -3.9218 2.29219   2
  -2  -2  -5 0.03122 2.68521   3
  -2  -2  -5 -2.7756 2.12624   1
   2   2   5 -0.7687 2.12886   4
   2   2   5 -1.3481 2.25423   1
  -2   2  -5 -0.4799 1.86968   2
  -3  -2  -5 3.96432 2.61827   1
  -3  -2  -5 2.46461 3.11489   2
  -3  -2  -5 -1.7818 2.37263   3
  -3   2  -5 -2.8046 1.89637   2
  -3   2  -5 -0.2731 1.38475   4
   3   2   5 -0.2143 2.46953   4
   3   2   5 1.32052 2.42345   1
  -3   2  -5 -0.8621 1.34692   4
  -4  -2  -5 3.21961 2.57675   3
  -4  -2  -5 0.89614 3.06741   2
  -4  -2  -5 4.69166 2.97259   1
   4   2   5 6.15161 2.95730   1
   4   2   5 0.73659 2.61540   4
  -4   2  -5 5.47738 2.38760   4
  -4   2  -5 1.16070 1.88786   4
  -4   2  -5 4.40428 2.89051   2
  -5  -2  -5 3.66947 3.38601   2
  -5  -2  -5 -2.1055 2.62816   1
  -5   2  -5 -0.3320 2.72573   2
   5   2   5 7.06317 3.26468   4
   5   2   5 6.69974 3.27618   1
   6  -2   5 574.286 15.5735   1
  -6  -2  -5 596.941 21.0335   2
  -6  -2  -5 564.083 16.9620   1
   6   2   5 573.129 17.2885   4
  -6   2  -5 567.531 18.1180   2
   6   2   5 598.317 18.4060   1
  -7  -2  -5 1.57263 3.82917   1
  -7  -2  -5 1.98637 4.29003   2
   7  -2   5 5.08800 3.36919   1
   7   2   5 2.41178 3.52370   1
   7   2   5 0.91733 3.55502   4
  -7   2  -5 -1.1145 3.64327   2
   8  -2   5 134.818 9.91168   1
  -8  -2  -5 149.002 13.9490   2
  -8  -2  -5 136.439 10.3168   1
  -8   2  -5 132.197 12.1021   2
   8   2   5 139.704 10.3110   4
   8   2   5 121.134 11.4884   1
   9  -2   5 28.2718 6.55176   1
  -9  -2  -5 36.7635 6.90677   1
  -9  -2  -5 30.2324 8.16761   2
   9   2   5 42.2479 8.57879   1
   9   2   5 21.5605 5.94361   4
  -9   2  -5 39.2007 8.16556   2
 -10  -2  -5 -2.1878 4.73257   2
 -10  -2  -5 -0.9731 4.21197   1
  10   2   5 -6.0879 3.73556   1
 -10   2  -5 -4.2173 4.09709   2
 -11  -2  -5 -2.8355 5.14259   2
 -11  -2  -5 0.18288 4.60912   1
  11   2   5 0.17917 4.67719   1
 -11   2  -5 -4.8378 5.05575   2
 -11   2  -5 0.73149 3.21838   1
 -12  -2  -5 48.1197 8.88715   1
 -12  -2  -5 66.1834 11.9575   2
 -12   2  -5 66.0740 11.1351   2
 -12   2  -5 54.3162 6.46190   1
  12   2   5 50.5345 9.81745   1
 -13  -2  -5 29.2741 7.90940   1
 -13  -2  -5 33.7413 10.6836   2
  13   2   5 49.1386 10.5916   1
 -13   2  -5 48.1778 10.5713   2
  13  -3  -5 12.3186 6.63906   1
  13   3  -5 26.7915 7.41503   1
  12  -3  -5 223.083 16.4621   1
  12   3  -5 223.017 14.4660   1
  11  -3  -5 8.62710 5.44027   1
  11   3  -5 12.4522 5.43187   1
  10  -3  -5 47.6188 8.89826   1
  10   3  -5 43.5806 6.78739   3
  10   3  -5 42.5835 7.25654   1
   9  -3  -5 1048.77 29.7931   1
  -9   3   5 1008.24 30.0062   4
   9   3  -5 1008.01 25.6875   3
   9   3  -5 986.466 25.7051   1
   8  -3  -5 30.2095 6.35310   1
   8   3  -5 38.6085 6.55491   3
  -8   3   5 38.2267 7.25704   4
   8   3  -5 34.5638 5.87383   1
   7  -3  -5 9.09782 4.49744   1
  -7   3   5 14.4922 4.94997   4
   7   3  -5 7.83921 3.41281   1
   7   3  -5 11.1962 4.32795   3
   6  -3  -5 3.40184 3.84016   1
   6   3  -5 1.99569 3.06592   3
   6   3  -5 -3.1153 2.14803   1
  -6   3   5 -0.3465 3.35205   4
   5  -3  -5 -0.4148 2.65785   1
   5   3  -5 0.12910 1.89621   1
   5   3  -5 -0.2662 3.06566   3
  -5   3   5 1.70502 3.28362   4
   4  -3  -5 11.8324 3.53065   1
  -4   3   5 16.9536 4.41208   4
   3  -3  -5 6.05874 3.08544   1
   3  -3  -5 4.64017 3.49556   2
  -3   3   5 4.64127 3.06104   4
   2  -3  -5 226.779 10.8910   2
   2  -3  -5 235.528 10.0010   1
  -2   3   5 238.922 10.2234   4
   1  -3  -5 296.609 10.7310   1
   1  -3  -5 308.775 12.3552   2
  -1   3   5 282.209 10.9076   1
  -1   3   5 284.488 10.9644   4
   0  -3  -5 138.162 7.46721   1
   0  -3  -5 136.551 8.61247   2
   0   3   5 130.032 7.55901   4
   0   3   5 143.555 7.86873   1
  -1  -3  -5 71.7428 6.26156   1
  -1  -3  -5 68.5799 7.24708   2
   1   3   5 74.2733 7.09914   1
  -1   3  -5 64.8727 3.71052   2
   1   3   5 74.6353 6.57840   4
  -2  -3  -5 1099.93 23.0890   3
  -2  -3  -5 1036.23 25.1059   2
  -2  -3  -5 1073.45 22.5516   1
   2   3   5 1065.90 22.7197   4
   2   3   5 1096.75 23.3680   1
  -2   3  -5 1058.24 18.0429   2
  -3  -3  -5 161.810 8.61304   1
  -3  -3  -5 168.611 10.1399   2
  -3  -3  -5 174.470 8.28498   3
  -3   3  -5 161.192 4.98166   4
   3   3   5 157.245 8.77068   1
   3   3   5 166.427 8.81444   4
  -3   3  -5 160.013 6.63241   2
  -3   3  -5 168.335 5.30196   4
  -4  -3  -5 256.747 11.0593   1
  -4  -3  -5 256.117 9.32257   3
  -4  -3  -5 263.316 12.9924   2
   4   3   5 259.828 11.3287   4
   4   3   5 272.478 11.7234   1
  -4   3  -5 250.310 9.43869   2
  -4   3  -5 262.465 8.32973   4
  -5  -3  -5 11.1741 3.88140   1
  -5  -3  -5 3.53437 3.89153   2
  -5  -3  -5 6.95510 2.69976   3
   5   3   5 5.78865 3.45070   1
  -5   3  -5 7.39282 2.84101   4
  -5   3  -5 12.6763 3.63868   2
   5   3   5 6.22284 3.77931   4
   6  -3   5 172.685 9.92082   1
  -6  -3  -5 164.942 10.3459   1
  -6  -3  -5 195.997 12.7766   2
   6   3   5 175.990 10.9203   1
  -6   3  -5 161.579 9.53930   2
   6   3   5 163.850 10.3178   4
  -6   3  -5 187.313 9.36207   4
   7  -3   5 53.9134 6.73107   1
  -7  -3  -5 70.3449 9.70932   2
  -7  -3  -5 50.8584 7.67908   1
   7   3   5 77.3597 9.19719   1
  -7   3  -5 77.7518 8.54938   2
   7   3   5 77.3268 8.63127   4
  -8  -3  -5 335.686 15.6252   1
  -8  -3  -5 317.272 17.8600   2
   8   3   5 302.550 15.6430   1
   8   3   5 317.175 15.1999   4
  -8   3  -5 281.221 14.4976   2
  -9  -3  -5 75.4630 9.49073   1
  -9  -3  -5 58.3097 10.3298   2
  -9   3  -5 73.2125 9.83046   2
   9   3   5 78.7322 11.3984   1
   9   3   5 87.5647 10.2234   4
 -10  -3  -5 8.05127 5.32687   1
 -10  -3  -5 -8.0875 4.18784   2
  10   3   5 -0.3046 4.24103   1
 -10   3  -5 2.21904 4.87076   2
 -11  -3  -5 32.4697 9.20377   2
 -11  -3  -5 42.1818 8.18415   1
 -11   3  -5 31.3746 7.93098   2
  11   3   5 55.2773 10.5892   1
 -12  -3  -5 7.73259 5.77844   1
 -12  -3  -5 0.05595 6.15662   2
 -12   3  -5 4.08738 5.60277   2
  12   3   5 1.22915 5.36976   1
 -13  -3  -5 95.0248 12.2519   1
 -13  -3  -5 95.2148 14.9116   2
 -13   3  -5 102.550 14.2237   2
  13   3   5 72.2793 11.8929   1
  13  -4  -5 54.6888 10.3799   1
  13   4  -5 61.3149 9.86647   1
  13   4  -5 62.0225 11.7508   4
  12  -4  -5 54.3516 9.59572   1
  12   4  -5 54.2701 9.02549   1
  12   4  -5 54.5677 10.4236   4
  11  -4  -5 10.8549 6.83921   1
  11   4  -5 7.33397 4.63797   1
  10  -4  -5 91.5487 12.0086   1
 -10   4   5 104.765 12.6124   4
  10   4  -5 92.6908 9.74273   1
   9  -4  -5 184.402 13.1889   1
   9   4  -5 151.666 10.0638   1
  -9   4   5 158.979 14.3254   4
   8  -4  -5 296.911 15.4363   1
  -8   4   5 292.533 15.9182   4
   8   4  -5 276.016 12.0973   1
   7  -4  -5 58.9643 8.02101   1
   7   4  -5 68.1308 6.68928   1
  -7   4   5 59.9736 8.47625   4
   6  -4  -5 172.303 11.2087   1
   6   4  -5 187.418 7.89160   1
  -6   4   5 192.380 12.0034   4
   5  -4  -5 -0.7819 2.92947   1
  -5   4   5 -0.0459 3.46203   4
   4  -4  -5 36.6143 6.34803   2
   4  -4  -5 47.5087 6.97218   1
  -4   4   5 46.0596 6.48282   4
   3  -4  -5 18.4920 4.52094   1
   3  -4  -5 14.9017 4.52847   2
  -3   4   5 21.6970 4.72669   4
   2  -4  -5 163.366 9.25366   1
   2  -4  -5 172.036 10.0000   2
  -2   4   5 166.672 9.37041   4
   1  -4  -5 5.12798 3.08492   1
   1  -4  -5 7.63855 3.77274   2
  -1   4   5 8.89748 3.55357   4
  -1   4   5 8.60854 3.24159   1
   0  -4  -5 574.350 16.5175   1
   0  -4  -5 572.622 17.8888   2
   0   4   5 587.277 16.8622   4
   0   4   5 576.653 16.7921   1
  -1  -4  -5 594.590 18.6052   2
  -1  -4  -5 614.108 17.1633   1
   1   4   5 627.859 17.6397   1
   1   4   5 598.398 17.5029   4
  -2  -4  -5 1.81257 3.14814   2
  -2  -4  -5 3.18436 3.00632   1
  -2   4  -5 -0.7412 1.19164   2
   2   4   5 2.36921 3.04296   4
   2   4   5 1.76208 2.93344   1
  -3  -4  -5 16.5228 4.56738   1
  -3  -4  -5 14.2497 4.67558   2
  -3   4  -5 18.6401 2.57862   4
   3   4   5 15.7964 4.65880   1
   3   4   5 25.6782 5.11233   4
  -3   4  -5 17.6696 2.68906   2
  -4  -4  -5 10.1995 3.27508   3
  -4  -4  -5 10.7705 4.94943   2
  -4  -4  -5 10.3775 4.47041   1
   4   4   5 10.4432 3.97569   1
   4   4   5 11.6104 4.18702   4
  -4   4  -5 9.02826 2.66212   4
  -4   4  -5 9.69794 2.95724   2
  -5  -4  -5 4.71919 4.09580   1
  -5  -4  -5 1.20221 4.20063   2
  -5  -4  -5 -0.1915 2.39235   3
  -5   4  -5 1.58339 2.57215   4
   5   4   5 5.31554 3.82515   4
  -5   4  -5 6.17487 2.93408   2
   5   4   5 4.41426 3.59674   1
  -6  -4  -5 11.1532 4.52108   1
  -6  -4  -5 14.2731 5.65818   2
   6   4   5 11.6370 5.17312   1
  -6   4  -5 23.5638 4.89372   2
  -6   4  -5 13.9530 4.00310   4
   6   4   5 22.2841 5.80519   4
  -7  -4  -5 11.9865 5.87320   2
  -7  -4  -5 6.40492 4.96748   1
  -7   4  -5 3.12419 3.77515   4
   7   4   5 21.4298 6.03361   4
   7   4   5 9.64105 4.78457   1
  -7   4  -5 10.0386 4.26247   2
  -8  -4  -5 53.0753 9.78319   2
  -8  -4  -5 56.6525 8.73455   1
  -8   4  -5 61.8653 8.13544   2
  -8   4  -5 55.4054 7.70024   4
   8   4   5 75.6385 10.0484   1
   8   4   5 63.6080 9.14220   4
  -9  -4  -5 202.367 13.9560   1
  -9  -4  -5 210.056 15.9953   2
  -9   4  -5 206.531 13.0874   2
   9   4   5 204.210 14.0809   1
   9   4   5 191.426 13.4859   4
 -10  -4  -5 108.232 14.6029   2
 -10  -4  -5 84.3605 10.7143   1
  10   4   5 88.0167 11.0147   1
 -10   4  -5 114.188 12.4137   2
  10   4   5 89.3425 11.5800   4
 -11  -4  -5 84.5889 12.0273   1
 -11  -4  -5 65.9245 11.9288   2
 -11   4  -5 92.8732 11.8362   2
  11   4   5 72.9319 11.1169   1
 -12  -4  -5 96.9076 14.8028   2
 -12  -4  -5 98.1569 12.6293   1
 -12   4  -5 126.833 14.7206   2
  12   4   5 103.056 13.3643   1
 -13  -4  -5 24.0382 8.26359   1
 -13  -4  -5 29.7860 10.0776   2
  13   4   5 53.5833 12.2162   1
 -13   4  -5 31.5726 9.48567   2
  13  -5  -5 122.032 15.2357   1
  13   5  -5 121.399 15.5472   4
  13   5  -5 115.609 12.6192   1
  12  -5  -5 3.43569 5.68262   1
  12   5  -5 7.66303 6.70590   4
  12   5  -5 3.98984 4.87453   1
  11  -5  -5 217.456 16.1315   1
  11   5  -5 201.704 12.6924   1
  11   5  -5 182.476 16.5524   4
 -11   5   5 181.781 17.7478   4
  10  -5  -5 27.6416 7.42420   1
  10   5  -5 21.7108 5.77702   1
  10   5  -5 32.7435 7.82965   4
 -10   5   5 41.5352 8.85396   4
   9  -5  -5 11.8496 5.71368   1
  -9   5   5 28.5285 7.63080   4
   9   5  -5 13.5324 4.62598   1
   8  -5  -5 24.7941 6.17861   1
  -8   5   5 39.9390 7.99163   4
   8   5  -5 26.6609 5.08746   1
   7  -5  -5 13.7234 5.46119   1
  -7   5   5 9.18821 5.47864   4
   7   5  -5 9.91689 3.54607   1
   6  -5  -5 25.6567 5.92686   1
  -6   5   5 13.9811 5.56467   4
   5  -5  -5 69.6671 9.02470   1
  -5   5   5 43.3305 7.19835   4
   4  -5  -5 8.67750 4.21348   1
   4  -5  -5 6.53108 4.24718   2
  -4   5   5 0.62557 4.01750   4
   3  -5  -5 604.762 19.0666   1
   3  -5  -5 597.269 19.6710   2
  -3   5   5 615.114 19.3838   4
   2  -5  -5 290.858 12.7910   1
   2  -5  -5 266.977 12.8419   2
  -2   5   5 276.141 13.0155   4
   1  -5  -5 119.034 9.14439   2
   1  -5  -5 116.540 8.70337   1
  -1   5   5 113.958 8.70322   4
  -1   5   5 107.494 8.33385   1
   0  -5  -5 199.535 11.1539   2
   0  -5  -5 195.886 10.5651   1
   0   5   5 200.069 10.9630   4
   0   5   5 202.743 10.7801   1
   0   5  -5 207.618 6.05794   4
  -1  -5  -5 6.29652 3.58581   1
  -1  -5  -5 2.79894 3.57497   2
   1   5   5 0.27521 2.91713   1
  -1   5  -5 3.24085 1.64069   4
   1   5   5 -1.2153 3.10116   4
  -2  -5  -5 260.915 12.5310   1
  -2  -5  -5 239.730 12.9251   2
   2   5   5 262.119 12.4551   1
  -2   5  -5 254.328 6.96469   4
   2   5   5 266.553 12.5145   4
  -3  -5  -5 478.485 18.4492   2
  -3  -5  -5 481.177 17.1199   1
   3   5   5 491.178 17.1476   1
   3   5   5 522.320 17.6818   4
  -3   5  -5 492.577 11.5303   4
  -4  -5  -5 205.827 11.9475   1
  -4  -5  -5 185.127 12.2912   2
   4   5   5 175.064 11.2184   1
   4   5   5 203.054 11.6065   4
  -4   5  -5 212.008 8.33749   4
  -4   5  -5 208.841 7.04470   2
  -5  -5  -5 69.0606 8.44451   1
  -5  -5  -5 85.4078 6.30849   3
  -5  -5  -5 88.1683 10.6653   2
   5   5   5 83.0284 9.27015   4
  -5   5  -5 93.2382 6.77361   4
  -5   5  -5 78.7810 5.70091   2
   5   5   5 85.0908 9.34881   1
  -6  -5  -5 138.157 6.49200   3
  -6  -5  -5 154.989 14.6386   2
  -6  -5  -5 134.864 12.8976   1
  -6   5  -5 133.877 8.76619   4
   6   5   5 135.353 11.8043   1
  -6   5  -5 145.222 8.45326   2
   6   5   5 152.512 11.4736   4
  -7  -5  -5 124.714 12.0144   1
  -7  -5  -5 133.624 14.5456   2
   7   5   5 86.1435 10.3263   4
  -7   5  -5 116.511 8.54418   2
  -7   5  -5 114.186 9.74322   4
   7   5   5 99.8403 10.9159   1
  -8  -5  -5 30.0881 7.65622   1
  -8  -5  -5 18.8042 6.89390   2
   8   5   5 20.6350 6.68596   4
  -8   5  -5 25.0328 5.91648   4
  -8   5  -5 31.9017 6.13237   2
   8   5   5 33.6379 7.56282   1
  -9  -5  -5 -6.0919 3.93787   1
  -9  -5  -5 1.79011 4.94744   2
  -9   5  -5 -2.4222 3.62180   4
   9   5   5 -4.5013 4.55208   4
  -9   5  -5 -2.0443 3.98175   2
   9   5   5 -1.1443 4.31134   1
 -10  -5  -5 21.5671 8.05737   2
 -10  -5  -5 29.0357 7.52705   1
  10   5   5 26.1399 7.63580   4
 -10   5  -5 30.9781 7.18488   2
  10   5   5 26.1809 7.74500   1
 -11  -5  -5 65.0808 12.6367   2
 -11  -5  -5 44.8149 9.92410   1
 -11   5  -5 51.9579 9.42975   2
  11   5   5 70.1091 12.1512   1
 -12  -5  -5 -2.2475 5.90183   1
 -12  -5  -5 -7.6023 6.80243   2
 -12   5  -5 -5.0228 4.69591   2
  12   5   5 5.84892 6.42776   1
  12  -6  -5 24.6383 9.21459   1
  12   6  -5 23.8572 6.42813   1
 -12   6   5 6.84815 7.29721   4
  12   6  -5 14.5803 7.43302   4
  11  -6  -5 54.0687 11.1932   1
 -11   6   5 53.7216 10.5842   4
  11   6  -5 68.5965 11.4563   4
  11   6  -5 74.7354 9.18161   1
  10  -6  -5 -3.9503 4.36554   1
 -10   6   5 6.72733 5.66412   4
  10   6  -5 1.31411 5.04622   4
  10   6  -5 2.78504 3.89821   1
   9  -6  -5 8.14525 5.36108   1
  -9   6   5 5.09019 5.78200   4
   9   6  -5 -1.1484 4.58950   4
   9   6  -5 1.46892 3.51666   1
   8  -6  -5 -0.1200 4.35931   1
   8   6  -5 2.57637 4.43547   4
  -8   6   5 -3.7173 4.43916   4
   8   6  -5 2.89512 2.98601   1
   7  -6  -5 101.472 10.8382   1
  -7   6   5 81.6260 10.5709   4
   7   6  -5 85.1208 9.88280   4
   6  -6  -5 9.20726 4.96596   1
   6   6  -5 9.83272 4.68415   4
  -6   6   5 2.86944 4.57498   4
   5  -6  -5 283.812 14.9094   1
  -5   6   5 292.156 15.4030   4
   5   6  -5 267.259 12.7667   4
   4  -6  -5 28.8266 6.24446   1
   4  -6  -5 29.5605 6.50043   2
   4   6  -5 16.8715 4.52768   4
  -4   6   5 26.1764 6.42385   4
   3  -6  -5 16.0603 5.17545   2
  -3  -6   5 29.2160 4.53989   2
   3  -6  -5 34.5742 6.13820   1
   3   6  -5 24.6480 4.56967   4
  -3   6   5 22.8783 5.74918   4
   2  -6  -5 -3.5081 3.39900   2
   2  -6  -5 3.86889 3.93136   1
  -2  -6   5 0.21645 1.89445   2
  -2   6   5 -2.9878 3.28344   4
   2   6  -5 0.06670 2.47454   4
   1  -6  -5 1644.58 35.4883   1
   1  -6  -5 1707.81 36.7802   2
   1   6  -5 1734.12 28.4532   4
  -1   6   5 1709.07 36.3526   4
   0  -6  -5 297.178 14.1582   2
   0  -6  -5 323.116 14.4473   1
   0   6   5 287.939 13.9291   4
   0   6   5 325.332 14.3608   1
   0   6  -5 321.650 9.52866   4
  -1  -6  -5 703.465 22.0345   2
  -1  -6  -5 660.902 20.9197   1
  -1   6  -5 676.384 14.3464   4
   1   6   5 653.292 20.7707   1
   1   6   5 692.909 21.6932   4
  -2  -6  -5 133.081 10.5339   2
  -2  -6  -5 136.302 10.3985   1
  -2   6  -5 134.970 6.46582   4
   2   6   5 142.889 10.6723   4
   2   6   5 123.173 9.76026   1
  -3  -6  -5 1210.86 31.7010   2
  -3  -6  -5 1203.19 30.1742   1
  -3   6  -5 1241.58 22.9451   4
   3   6   5 1258.23 30.5284   1
   3   6   5 1231.50 30.4973   4
  -4  -6  -5 10.8817 5.69691   1
  -4  -6  -5 14.8025 5.79075   2
   4   6   5 13.3772 5.25630   1
   4   6   5 11.3669 5.07024   4
  -4   6  -5 8.30289 3.14906   4
  -5  -6  -5 222.738 14.5398   2
  -5  -6  -5 249.343 14.2915   1
  -5   6  -5 225.225 10.4893   4
   5   6   5 247.658 14.5135   4
   5   6   5 225.658 13.6398   1
  -5   6  -5 235.387 8.31031   2
  -6  -6  -5 5.78740 5.32708   1
  -6  -6  -5 -3.4468 4.61155   2
  -6  -6  -5 2.93163 2.77191   3
  -6   6  -5 1.42977 2.66928   2
   6   6   5 0.61506 4.34032   1
  -6   6  -5 -3.7153 2.89020   4
   6   6   5 0.92347 4.57933   4
  -7  -6  -5 17.8708 6.58199   2
  -7  -6  -5 7.09771 5.70415   1
   7   6   5 1.85829 4.70060   4
  -7   6  -5 3.48404 3.98962   4
   7   6   5 3.86611 4.95715   1
  -7   6  -5 13.2443 3.87371   2
  -8  -6  -5 6.96544 5.44260   1
  -8  -6  -5 19.1228 7.37940   2
   8   6   5 11.2703 5.98193   4
  -8   6  -5 12.8565 5.11202   4
  -8   6  -5 13.1130 4.66950   2
   8   6   5 12.2178 5.88241   1
  -9  -6  -5 4.40843 5.68203   2
  -9  -6  -5 -4.2794 4.77156   1
   9   6   5 0.29012 4.58764   1
   9   6   5 -5.3477 5.18825   4
  -9   6  -5 -0.5922 3.82734   4
  -9   6  -5 1.71186 3.76001   2
 -10  -6  -5 214.469 20.4111   2
 -10  -6  -5 198.929 15.9545   1
 -10   6  -5 205.929 14.4217   4
 -10   6  -5 208.606 13.7098   2
  10   6   5 205.353 15.8561   1
  10   6   5 216.058 16.5256   4
 -11  -6  -5 49.3910 11.1105   2
 -11  -6  -5 23.8430 7.98756   1
  11   6   5 29.7438 8.57704   1
 -11   6  -5 31.2744 7.75987   2
 -12  -6  -5 -1.3640 5.94384   1
 -12  -6  -5 8.03058 7.48727   2
 -12   6  -5 2.18784 5.25320   2
  12   6   5 -2.1355 5.92686   1
 -11  -7   5 173.031 18.0180   2
  11  -7  -5 174.313 17.5281   1
  11   7  -5 214.658 19.3401   4
 -11   7   5 165.136 16.8040   4
  11   7  -5 173.585 11.2316   1
  10  -7  -5 3.70005 5.51345   1
 -10  -7   5 8.38754 6.47610   2
 -10   7   5 9.30961 7.23116   4
  10   7  -5 1.83280 5.25179   4
  10   7  -5 9.31436 4.21525   1
  -9  -7   5 133.906 14.5011   2
   9  -7  -5 161.705 15.9737   1
   9   7  -5 123.280 8.43249   1
   9   7  -5 122.515 13.0970   4
  -9   7   5 115.663 14.3368   4
   8  -7  -5 21.4964 6.88781   1
  -8  -7   5 12.1349 5.95908   2
   8   7  -5 23.1089 6.70764   4
  -8   7   5 13.1542 6.99364   4
  -7  -7   5 245.842 14.4253   2
   7  -7  -5 281.555 16.4206   1
   7   7  -5 258.715 14.9583   4
  -7   7   5 273.502 16.8544   4
  -6  -7   5 47.8788 7.65587   2
   6  -7  -5 56.0255 9.05494   1
  -6   7   5 60.6301 9.28101   4
   6   7  -5 58.7179 8.23954   4
  -5  -7   5 8.66112 4.31784   2
   5  -7  -5 2.13612 4.62936   1
   5   7  -5 6.89468 4.17473   4
  -5   7   5 6.91899 5.95789   4
   4  -7  -5 12.2855 5.34821   2
  -4  -7   5 14.8502 3.94152   2
   4  -7  -5 11.8906 5.40849   1
   4   7  -5 18.3146 4.98484   4
  -4   7   5 18.8919 6.11047   4
   3  -7  -5 126.019 11.5788   2
  -3  -7   5 123.194 6.82256   2
   3  -7  -5 122.906 11.2654   1
  -3   7   5 126.898 12.2812   4
   3   7  -5 120.812 8.63277   4
   2  -7  -5 52.6780 8.21856   2
   2  -7  -5 40.1397 7.31571   1
  -2  -7   5 52.0576 3.84108   2
  -2   7   5 74.5751 9.65596   4
   2   7  -5 62.5345 6.76051   4
   1  -7  -5 6.69987 4.47000   1
   1  -7  -5 8.15114 4.81858   2
   1   7  -5 8.39823 3.46068   4
  -1   7   5 13.1815 5.34001   4
   0  -7  -5 19.9734 6.07548   1
   0  -7  -5 8.95613 4.69113   2
   0   7  -5 18.4434 3.85904   4
   0   7   5 28.8998 6.52055   4
   0   7   5 14.9876 4.88258   1
  -1  -7  -5 29.0327 6.30960   1
  -1  -7  -5 23.1859 5.84696   2
  -1   7  -5 25.6621 4.22777   4
   1   7   5 21.4385 6.40385   4
   1   7   5 25.1614 5.66649   1
  -2  -7  -5 13.3435 5.48328   2
  -2  -7  -5 10.7871 5.06000   1
   2   7   5 9.03636 4.79796   1
   2   7   5 8.31395 4.80242   4
  -2   7  -5 10.4424 3.44825   4
  -3  -7  -5 156.445 12.1773   2
  -3  -7  -5 170.041 12.4779   1
   3   7   5 172.965 14.6411   4
  -3   7  -5 187.445 9.22243   4
   3   7   5 195.290 12.6211   1
  -4  -7  -5 39.4568 7.88189   2
  -4  -7  -5 34.4939 7.02504   1
   4   7   5 40.3524 7.65853   1
  -4   7  -5 44.8931 5.79533   4
   4   7   5 43.7767 7.91970   4
  -5  -7  -5 179.159 13.3195   1
  -5  -7  -5 179.502 13.7065   2
   5   7   5 167.432 14.4936   4
   5   7   5 192.869 13.1764   1
  -5   7  -5 181.054 10.3186   4
  -6  -7  -5 -2.9885 3.89497   1
  -6  -7  -5 -1.8740 4.68497   2
   6   7   5 -0.6513 4.35706   1
   6   7   5 4.66731 5.42641   4
  -6   7  -5 -1.4112 3.20362   4
  -7  -7  -5 187.518 17.5202   2
  -7  -7  -5 183.791 14.1360   1
   7   7   5 172.521 13.7963   1
   7   7   5 198.158 14.7289   4
  -7   7  -5 197.377 12.1392   4
  -8  -7  -5 383.431 20.2982   1
  -8  -7  -5 403.002 22.0867   2
   8   7   5 387.554 19.7770   1
  -8   7  -5 396.069 17.4881   4
   8   7   5 406.283 20.6962   4
  -9  -7  -5 8.43082 6.70525   1
  -9  -7  -5 4.47036 6.29121   2
   9   7   5 10.8400 6.78063   1
  -9   7  -5 8.09247 5.30026   4
   9   7   5 17.7307 7.43421   4
 -10  -7  -5 9.90411 6.98408   2
 -10  -7  -5 -5.8465 4.93285   1
  10   7   5 11.8132 6.43911   4
  10   7   5 -4.4892 4.87912   1
 -10   7  -5 3.54411 4.70695   4
 -11  -7  -5 95.0128 13.0463   1
 -11  -7  -5 117.913 16.9324   2
  11   7   5 124.861 15.2458   1
 -11   7  -5 102.865 12.5851   4
  11  -8  -5 50.5566 10.7510   1
  11   8  -5 47.3575 10.3452   4
 -11   8   5 34.2244 9.46033   4
  11   8  -5 39.8205 6.29517   1
 -10  -8   5 10.8001 7.13322   2
  10  -8  -5 12.0786 7.94285   1
 -10   8   5 6.49536 7.12554   4
  10   8  -5 13.7958 7.47646   4
   9  -8  -5 49.0317 9.64380   1
  -9  -8   5 41.3476 8.88607   2
   9   8  -5 57.5053 10.1538   4
  -9   8   5 66.0859 11.4561   4
   8  -8  -5 8.04208 6.26333   1
  -8  -8   5 16.7569 6.34230   2
  -8   8   5 13.0901 7.26283   4
   8   8  -5 11.1371 5.55114   4
  -7  -8   5 108.898 11.3284   2
   7  -8  -5 111.809 13.1833   1
  -7   8   5 98.5518 12.1034   4
   7   8  -5 131.136 12.9386   4
  -6  -8   5 458.334 17.8822   2
   6  -8  -5 506.358 22.1803   1
   6   8  -5 464.809 19.4018   4
  -6   8   5 472.881 21.8996   4
  -5  -8   5 400.951 15.1765   2
   5  -8  -5 413.008 19.6514   1
  -5   8   5 413.048 20.0076   4
   5   8  -5 423.451 17.5457   4
   4  -8  -5 190.863 13.7014   1
   4  -8  -5 244.279 14.6492   2
  -4  -8   5 231.979 10.2592   2
  -4   8   5 208.283 14.7590   4
   4   8  -5 220.787 12.4411   4
   3  -8  -5 97.8376 12.0039   1
   3  -8  -5 105.046 11.2894   2
  -3   8   5 84.1498 10.7801   4
   3   8  -5 89.3566 8.81913   4
   2  -8  -5 41.2355 7.71424   2
   2  -8  -5 47.2943 9.21330   1
   2   8  -5 39.7332 6.12718   4
  -2   8   5 44.6275 8.60193   4
   1  -8  -5 87.8385 10.9891   1
   1  -8  -5 84.9542 10.1777   2
   1   8  -5 95.7974 8.32344   4
  -1   8   5 85.3358 10.7116   4
   0  -8  -5 89.9006 10.5291   1
   0  -8  -5 89.0008 10.5765   2
   0   8   5 104.340 11.4660   4
   0   8  -5 105.868 8.49784   4
  -1  -8  -5 622.467 22.4746   2
  -1  -8  -5 627.310 23.0557   1
   1   8   5 612.678 23.3054   4
   1   8   5 598.669 21.9196   1
  -1   8  -5 639.122 17.4272   4
  -2  -8  -5 359.861 18.0003   1
  -2  -8  -5 383.115 18.4828   2
   2   8   5 369.953 17.4268   1
  -2   8  -5 398.847 13.7687   4
   2   8   5 418.137 19.2603   4
  -3  -8  -5 122.862 12.8753   2
  -3  -8  -5 130.506 12.5347   1
  -3   8  -5 129.643 8.72869   4
   3   8   5 132.641 13.3034   4
   3   8   5 129.230 12.1009   1
  -4  -8  -5 39.6414 7.68054   1
  -4  -8  -5 40.0044 8.34754   2
  -4   8  -5 44.8666 6.29490   4
   4   8   5 42.1856 8.02408   1
   4   8   5 38.8012 8.06620   4
  -5  -8  -5 55.6812 10.0748   2
  -5  -8  -5 56.5199 9.11347   1
   5   8   5 61.9287 9.69218   1
  -5   8  -5 60.4636 7.58834   4
   5   8   5 52.0146 9.59351   4
  -6  -8  -5 21.3878 7.00096   1
  -6  -8  -5 38.7497 9.08166   2
  -6   8  -5 36.3187 6.60076   4
   6   8   5 30.7871 7.17217   1
   6   8   5 42.6112 9.21535   4
  -7  -8  -5 132.456 14.9363   2
  -7  -8  -5 172.080 17.3532   1
   7   8   5 158.429 15.6937   4
  -7   8  -5 136.441 11.9642   4
   7   8   5 143.226 14.7193   1
  -8  -8  -5 83.2294 13.4516   2
  -8  -8  -5 61.8113 10.1556   1
   8   8   5 84.7189 12.2862   4
   8   8   5 90.9877 11.6193   1
  -8   8  -5 95.0565 11.1633   4
  -9  -8  -5 274.321 18.6701   1
  -9  -8  -5 251.289 19.3761   2
  -9   8  -5 244.976 15.6789   4
   9   8   5 258.824 18.5275   4
   9   8   5 300.769 18.9119   1
 -10  -8  -5 4.86598 6.46538   2
 -10  -8  -5 2.13571 5.40914   1
  10   8   5 3.90892 5.83059   1
  10   8   5 2.49359 7.11516   4
 -10   8  -5 9.22867 5.82623   4
  -9  -9   5 29.8701 7.93852   2
   9  -9  -5 59.1191 11.5046   1
  -9   9   5 39.1477 10.4436   4
   9   9  -5 56.1773 10.4641   4
   8  -9  -5 38.8834 9.40202   1
  -8  -9   5 20.0175 6.59575   2
   8   9  -5 33.5066 8.86611   4
  -8   9   5 28.5498 8.41224   4
   7  -9  -5 57.1786 10.5529   1
  -7  -9   5 69.7409 10.6036   2
  -7   9   5 57.7619 11.2042   4
   7   9  -5 61.2715 9.84672   4
   6  -9  -5 19.6274 7.13164   1
  -6   9   5 14.8447 6.87296   4
   6   9  -5 4.17024 5.05590   4
   5  -9  -5 50.2760 10.2877   1
  -5   9   5 57.8785 10.3906   4
   5   9  -5 40.3352 7.57063   4
   4  -9  -5 5.81075 5.21526   1
   4  -9  -5 17.5552 6.01587   2
   4   9  -5 3.31338 4.39506   4
  -4   9   5 12.3845 6.24221   4
   3  -9  -5 551.224 22.8089   1
   3  -9  -5 511.265 21.0590   2
   3   9  -5 554.596 19.5229   4
  -3   9   5 537.687 23.1639   4
   2  -9  -5 112.226 13.7175   1
   2  -9  -5 111.726 11.7408   2
  -2   9   5 89.6235 11.4876   4
   2   9  -5 97.8358 9.48892   4
   1  -9  -5 70.9836 9.82883   2
   1  -9  -5 79.6926 11.6221   1
  -1   9   5 43.5465 8.80876   4
   1   9  -5 42.8495 6.87292   4
   0  -9  -5 15.9159 5.60816   2
   0  -9  -5 11.7666 5.33287   1
   0   9   5 11.0443 6.03734   4
   0   9  -5 15.9817 4.81639   4
  -1  -9  -5 2.35290 4.75268   2
  -1  -9  -5 1.61841 3.98049   1
  -1   9  -5 -0.0886 3.29086   4
   1   9   5 0.98201 5.10873   4
  -2  -9  -5 691.276 25.2859   2
  -2  -9  -5 719.802 26.1046   1
   2   9   5 660.984 24.2569   1
   2   9   5 726.501 26.9250   4
  -2   9  -5 745.171 20.8314   4
  -3  -9  -5 89.3061 11.3862   2
  -3  -9  -5 98.0276 11.3014   1
   3   9   5 111.309 12.7795   4
   3   9   5 80.8792 10.4358   1
  -3   9  -5 105.325 9.55688   4
  -4  -9  -5 143.807 16.0274   1
   4   9   5 117.837 13.4810   4
   4   9   5 142.458 14.2030   1
  -4   9  -5 125.136 10.8971   4
  -5  -9  -5 -2.3126 4.80171   2
  -5  -9  -5 4.44705 5.86052   1
   5   9   5 7.68126 6.16565   4
  -5   9  -5 0.72057 3.89074   4
   5   9   5 2.55845 4.58699   1
  -6  -9  -5 46.1625 9.01262   1
  -6  -9  -5 63.2940 11.1803   2
   6   9   5 47.5191 9.91536   4
   6   9   5 44.0761 8.97664   1
  -6   9  -5 39.2720 7.29248   4
  -7  -9  -5 60.5345 11.2492   2
  -7  -9  -5 55.0570 9.98171   1
   7   9   5 65.9355 10.9602   1
  -7   9  -5 80.3388 10.0389   4
   7   9   5 60.7062 11.4621   4
  -8  -9  -5 44.9688 10.1371   1
  -8  -9  -5 63.2885 11.5343   2
  -8   9  -5 46.1276 8.62982   4
   8   9   5 71.7204 11.1383   1
   8   9   5 84.9422 13.7694   4
  -9  -9  -5 23.5171 8.68635   1
  -9  -9  -5 20.0923 8.82013   2
   9   9   5 23.3219 8.37856   1
   9   9   5 18.5506 8.41990   4
  -9   9  -5 36.8173 8.66093   4
   8 -10  -5 -3.8712 5.17408   1
  -8  10   5 7.39483 6.79649   4
   8  10  -5 1.85467 6.07968   4
   7 -10  -5 1.68387 5.38218   1
  -7  10   5 8.81490 6.83197   4
   7  10  -5 -7.6174 4.32757   4
   6 -10  -5 239.371 17.6746   1
   6  10  -5 202.906 15.0630   4
  -6  10   5 200.691 18.8647   4
   5 -10  -5 -3.8094 5.06403   1
  -5  10   5 -7.7957 5.22379   4
   5  10  -5 -2.0802 4.55803   4
   4 -10  -5 66.9039 11.1153   1
   4  10  -5 86.2454 10.3801   4
  -4  10   5 72.8392 11.4393   4
   3 -10  -5 143.243 13.6966   2
   3 -10  -5 123.979 13.4216   1
   3  10  -5 136.014 12.2855   4
  -3  10   5 136.366 14.8288   4
   2 -10  -5 42.7885 8.39625   2
   2 -10  -5 56.6084 11.0304   1
  -2  10   5 40.4744 8.87941   4
   2  10  -5 58.1221 8.41487   4
   1 -10  -5 96.8849 11.4764   2
   1 -10  -5 117.491 13.2849   1
   1  10  -5 98.8111 10.1154   4
  -1  10   5 96.5643 12.2718   4
   0 -10  -5 56.7431 10.4267   1
   0 -10  -5 74.6346 10.4343   2
   0  10  -5 59.3618 8.19861   4
   0  10   5 51.5782 9.98764   4
  -1 -10  -5 14.2799 6.21021   1
  -1 -10  -5 23.1529 7.10606   2
  -1  10  -5 11.0598 4.75634   4
   1  10   5 16.6762 7.38187   4
  -2 -10  -5 114.466 14.4871   1
  -2 -10  -5 140.624 14.0317   2
  -2  10  -5 104.687 10.3058   4
   2  10   5 128.637 15.3672   4
  -3 -10  -5 30.9951 7.83900   2
  -3 -10  -5 22.9378 8.09541   1
   3  10   5 32.0503 7.75138   1
   3  10   5 28.1898 8.24283   4
  -3  10  -5 38.1818 7.00713   4
  -4 -10  -5 4.03440 5.79175   1
  -4 -10  -5 8.25931 5.79851   2
   4  10   5 5.41085 5.44170   1
  -4  10  -5 10.2349 4.91227   4
   4  10   5 9.20325 6.23259   4
  -5 -10  -5 48.9613 9.87739   2
  -5 -10  -5 52.5065 9.82327   1
   5  10   5 46.4970 10.1272   4
  -5  10  -5 60.9712 8.62737   4
   5  10   5 46.1181 9.12398   1
  -6 -10  -5 8.54173 7.21815   1
  -6 -10  -5 19.6025 7.90568   2
   6  10   5 18.3190 7.15193   1
   6  10   5 6.50314 6.89429   4
  -6  10  -5 20.4742 6.14922   4
  -7 -10  -5 3.23348 6.45832   1
  -7 -10  -5 14.8710 7.54084   2
   7  10   5 3.96677 5.52284   1
  -7  10  -5 8.30169 5.70432   4
   7  10   5 0.61168 6.49713   4
  -8 -10  -5 39.3447 11.0279   1
  -8 -10  -5 18.6771 8.55721   2
   8  10   5 42.8216 10.4795   4
  -8  10  -5 32.2795 7.72613   4
   8  10   5 45.6501 10.0138   1
   6 -11  -5 44.5049 10.1940   1
   6  11  -5 48.2128 9.57831   4
  -6  11   5 59.0346 11.7374   4
   5 -11  -5 1.50857 6.67583   1
   5  11  -5 14.5315 5.86689   4
  -5  11   5 3.40387 6.56424   4
   4 -11  -5 118.778 15.1564   1
   4  11  -5 111.973 12.6804   4
  -4  11   5 86.5145 12.8212   4
   3 -11  -5 8.61975 6.55366   1
   3 -11  -5 13.8960 6.07974   2
  -3  11   5 4.84619 6.64386   4
   3  11  -5 4.29656 4.94158   4
   2 -11  -5 33.3527 7.77226   2
   2 -11  -5 24.0662 8.50383   1
   2  11  -5 26.3910 7.04861   4
  -2  11   5 44.1816 10.3440   4
   1 -11  -5 68.8046 11.7816   1
   1 -11  -5 77.3900 10.8104   2
   1  11  -5 72.6211 9.81504   4
  -1  11   5 77.7360 12.2811   4
   0 -11  -5 8.67131 5.22150   2
   0 -11  -5 7.40896 6.47273   1
   0  11   5 8.26181 6.69831   4
   0  11  -5 6.59820 4.56259   4
  -1 -11  -5 80.0506 12.3166   1
  -1 -11  -5 99.7155 12.3398   2
  -1  11  -5 79.4763 9.51489   4
   1  11   5 103.702 14.4205   4
  -2 -11  -5 17.0514 7.49742   1
  -2 -11  -5 19.9042 6.96656   2
   2  11   5 11.6856 7.36240   4
  -2  11  -5 22.4604 6.06859   4
  -3 -11  -5 -2.0837 4.46430   1
  -3 -11  -5 0.14897 5.43182   2
  -3  11  -5 1.81896 4.73510   4
   3  11   5 5.65449 6.35730   4
  -4 -11  -5 196.157 20.5293   1
  -4 -11  -5 141.303 15.3169   2
   4  11   5 147.337 14.9634   1
   4  11   5 155.692 16.6949   4
  -4  11  -5 148.014 13.2006   4
  -5 -11  -5 9.03496 7.39708   1
  -5 -11  -5 -1.2808 5.84002   2
   5  11   5 -3.9076 4.78527   1
  -5  11  -5 1.48123 4.28386   4
   5  11   5 -0.2944 6.73971   4
  -6 -11  -5 23.0274 8.04129   1
  -6 -11  -5 62.3188 11.7778   2
   6  11   5 68.3894 12.6430   4
  -6  11  -5 49.2593 8.83212   4
   6  11   5 40.2941 9.25636   1
   4 -12  -5 30.0443 9.32347   1
   4  12  -5 33.1461 8.30577   4
  -4  12   5 43.8836 10.6447   4
   3 -12  -5 28.0662 7.88640   2
   3 -12  -5 29.6545 8.88569   1
   3  12  -5 50.1473 9.08870   4
  -3  12   5 51.4251 11.3242   4
   2 -12  -5 1.55643 5.32458   2
   2 -12  -5 -4.5916 5.12704   1
   2  12  -5 -4.9538 4.59572   4
  -2  12   5 0.81023 6.36011   4
   1 -12  -5 50.1473 9.58533   2
   1 -12  -5 44.2371 10.2832   1
  -1  12   5 37.8266 10.4927   4
   1  12  -5 54.4424 9.36644   4
   0 -12  -5 71.2095 11.7730   1
   0 -12  -5 98.3394 12.4594   2
   0  12   5 82.5792 13.4691   4
   0  12  -5 90.7605 11.6638   4
  -1 -12  -5 -3.8246 4.96587   2
  -1 -12  -5 0.09699 5.43917   1
   1  12   5 -1.5907 6.42360   4
  -1  12  -5 -1.4633 4.62884   4
  -2 -12  -5 4.56673 5.52641   2
  -2 -12  -5 -3.4020 5.05014   1
   2  12   5 16.0492 8.49686   4
  -2  12  -5 13.6468 5.95073   4
  -3 -12  -5 3.56176 6.14048   1
  -3 -12  -5 -0.1901 5.15108   2
  -3  12  -5 8.22970 5.95933   4
   3  12   5 4.90933 7.92429   4
  14   0  -6 27.3667 8.29553   1
  13   0  -6 1.54935 4.97375   1
  12   0  -6 154.858 12.7852   3
  12   0  -6 152.139 13.9292   1
  11   0  -6 -2.8549 3.98198   1
  11   0  -6 -0.7635 4.70896   3
  10   0  -6 725.679 24.0541   1
  10   0  -6 796.681 25.5977   3
   9   0  -6 -1.7407 3.70024   1
   9   0  -6 -1.6244 4.18914   3
   8   0  -6 677.292 20.6760   1
   8   0  -6 700.276 22.7916   3
   7   0  -6 -3.2172 3.59803   3
   7   0  -6 1.10737 3.16854   1
   6   0  -6 823.366 23.4174   3
   6   0  -6 737.224 19.0337   1
   5   0  -6 -0.4116 2.31540   1
   5   0  -6 3.53597 3.83060   3
   4   0  -6 634.953 14.4131   1
   4   0  -6 635.637 16.9877   1
   4   0  -6 602.728 19.2692   3
   3   0  -6 -0.0154 1.60280   1
   3   0  -6 -1.0316 1.64850   1
   3   0  -6 2.04412 3.25366   3
   2   0  -6 1477.38 30.7117   3
   2   0  -6 1428.65 28.4106   2
  -2   0   6 1410.70 24.4724   1
   1   0  -6 1.28961 3.07823   3
   1   0  -6 -1.8424 2.21860   2
   0   0  -6 339.357 11.8057   2
   0   0  -6 316.216 12.6844   3
  -1   0  -6 -0.0482 2.81013   3
  -1   0  -6 1.65345 2.66979   2
  -1   0  -6 -1.4020 1.67120   4
  -2   0  -6 23.1938 4.91471   3
  -2   0  -6 19.4458 4.14921   2
  -3   0  -6 -0.8700 2.52929   2
   4   0   6 258.078 9.40680   1
  -4   0  -6 258.884 11.7709   2
   5   0   6 0.02420 2.40457   1
  -5   0  -6 -2.4307 2.86161   2
  -6   0  -6 313.656 14.9099   2
   6   0   6 300.928 12.1739   1
  -7   0  -6 0.69109 2.19521   1
   7   0   6 0.62759 3.02331   4
  -7   0  -6 -2.9913 3.83207   2
   7   0   6 -1.9140 3.06860   1
  -7   0  -6 6.26286 2.89969   1
  -8   0  -6 320.397 16.9524   2
  -8   0  -6 313.461 10.5938   1
   8   0   6 307.066 14.6276   1
  -8   0  -6 324.021 11.2102   1
  -9   0  -6 -2.2931 4.47294   2
   9   0   6 -0.3552 4.41416   1
  -9   0  -6 -3.0939 2.91988   1
 -10   0  -6 302.498 12.4231   1
  10   0   6 311.274 16.8289   1
 -10   0  -6 341.430 19.4982   2
 -11   0  -6 10.4403 6.24531   2
 -11   0  -6 -1.1274 3.77111   1
 -12   0  -6 -0.2302 3.94896   1
 -12   0  -6 2.86440 6.51020   2
 -13   0  -6 0.33290 5.87486   2
 -13   0  -6 7.39184 4.73473   1
  13  -1  -6 35.3437 8.85913   3
  13  -1  -6 37.0072 8.65763   1
  13   1  -6 38.6926 8.27166   1
  12  -1  -6 183.790 14.5892   1
  12  -1  -6 220.337 15.2707   3
  12   1  -6 181.845 13.7887   1
  12   1  -6 190.190 22.4719   3
  11  -1  -6 53.7947 8.57202   1
  11  -1  -6 41.5837 8.54527   3
  11   1  -6 42.2390 7.95971   3
  11   1  -6 60.5933 8.98981   1
  10  -1  -6 99.1678 11.8784   3
  10  -1  -6 109.912 11.0331   1
  10   1  -6 109.493 11.2849   3
  10   1  -6 118.785 11.0447   1
   9  -1  -6 58.4528 8.39878   1
   9  -1  -6 68.7750 9.93909   3
   9   1  -6 57.6722 8.26661   3
   9   1  -6 65.3145 8.03703   1
   8  -1  -6 712.425 22.0769   1
   8   1  -6 704.223 22.5669   3
   8   1  -6 719.435 20.5149   1
   7  -1  -6 27.5353 5.97873   1
   7   1  -6 17.8550 4.52575   1
   7   1  -6 30.1282 6.28060   3
   6  -1  -6 88.1034 7.86660   1
   6   1  -6 82.9264 8.97815   3
   6   1  -6 73.0658 6.54928   1
   5  -1  -6 101.454 10.1289   3
   5  -1  -6 85.2217 6.69769   1
   5   1  -6 88.6802 8.94456   3
   5   1  -6 77.9823 5.52215   1
   4  -1  -6 180.972 11.0700   3
   4  -1  -6 191.453 8.51931   1
   4   1  -6 199.544 10.9072   3
   4   1  -6 197.572 6.54360   1
   4   1  -6 188.979 6.53544   1
  -4   1   6 205.634 9.09825   4
   3  -1  -6 137.512 9.55914   3
   3  -1  -6 141.914 6.82067   1
   3  -1  -6 128.091 8.72501   2
   3   1  -6 121.134 8.78310   3
  -3   1   6 153.657 7.28781   4
   2  -1  -6 1.03511 1.86660   1
   2  -1  -6 1.08114 1.87451   1
   2  -1  -6 0.02977 3.36351   3
   2  -1  -6 3.04410 2.86057   2
  -2   1   6 1.06098 1.99114   4
  -2   1   6 0.13527 2.04333   1
   2   1  -6 1.70075 2.56083   2
   2   1  -6 3.36070 3.39220   3
   1  -1  -6 370.450 8.98843   1
   1  -1  -6 367.950 8.97113   1
   1  -1  -6 361.432 13.9003   3
   1  -1  -6 362.548 12.9868   2
   1   1  -6 368.760 11.7545   2
  -1   1   6 378.197 10.8377   1
   1   1  -6 372.265 13.9986   3
  -1   1   6 367.854 9.98446   4
   1   1  -6 361.990 8.60327   4
   0  -1  -6 73.6731 3.90515   1
   0  -1  -6 80.0983 7.36290   2
   0  -1  -6 73.2339 7.22832   3
   0  -1  -6 80.4278 3.95706   1
   0   1  -6 76.5699 5.73998   2
   0   1   6 83.0630 5.26933   1
   0   1  -6 82.4165 8.08791   3
   0   1  -6 79.3224 3.52987   4
  -1  -1  -6 5.91861 3.64271   3
  -1  -1  -6 7.87945 3.57915   2
  -1  -1  -6 9.42341 1.98549   1
  -1   1  -6 6.69011 1.68564   4
  -1   1  -6 4.86921 2.83302   2
   1   1   6 11.1939 2.84986   1
  -2  -1  -6 39.4396 3.16860   1
  -2  -1  -6 40.2777 5.50638   3
  -2  -1  -6 40.7901 3.29413   1
  -2  -1  -6 42.0937 5.95642   2
  -2   1  -6 36.2596 3.10598   4
   2   1   6 40.2581 4.41868   1
  -2   1  -6 34.7614 4.78172   2
  -3  -1  -6 111.095 4.76914   1
  -3  -1  -6 103.632 7.31721   3
  -3  -1  -6 108.039 8.03544   2
  -3  -1  -6 103.615 4.93816   1
  -3   1  -6 88.7840 4.84584   4
   3   1   6 106.899 6.42717   1
  -3   1  -6 103.581 7.04106   2
  -4  -1  -6 186.086 6.96644   1
  -4  -1  -6 177.784 6.59516   1
  -4  -1  -6 172.343 10.3054   2
   4   1   6 175.532 7.62203   4
   4   1   6 181.843 8.56995   1
  -4   1  -6 178.172 9.48785   2
  -5  -1  -6 2.68961 3.74256   2
  -5  -1  -6 10.5135 2.97272   1
  -5  -1  -6 10.2712 2.83008   1
  -5   1  -6 10.0772 3.99454   2
   5   1   6 3.06454 3.20916   1
   5   1   6 9.82412 3.18239   4
  -6  -1  -6 965.791 20.4521   1
  -6  -1  -6 945.709 27.1525   2
  -6  -1  -6 985.265 19.9081   1
   6  -1   6 977.702 22.1339   1
   6   1   6 1000.44 24.0675   1
  -6   1  -6 999.946 26.0623   2
   6   1   6 989.681 21.9842   4
  -7  -1  -6 60.9671 9.23952   2
   7  -1   6 74.4032 7.83580   1
  -7  -1  -6 62.2008 6.59272   1
  -7  -1  -6 72.0866 6.68450   1
  -7   1  -6 70.5329 9.17378   2
   7   1   6 74.9794 7.42773   4
   7   1   6 82.3650 9.47451   1
  -8  -1  -6 277.864 16.2727   2
   8  -1   6 274.080 13.3551   1
  -8  -1  -6 290.295 12.1612   1
  -8   1  -6 302.233 16.0269   2
   8   1   6 269.700 14.1640   1
  -9  -1  -6 14.9197 6.65199   2
  -9  -1  -6 16.0158 4.75756   1
  -9   1  -6 13.0455 6.02404   2
   9   1   6 18.5940 5.87914   1
 -10  -1  -6 137.256 10.1047   1
 -10  -1  -6 132.081 15.0751   2
  10   1   6 153.450 14.5152   1
 -10   1  -6 134.039 14.2004   2
 -11  -1  -6 556.509 26.2070   2
 -11  -1  -6 549.402 19.3036   1
  11   1   6 567.097 23.9305   1
 -11   1  -6 625.904 26.6427   2
 -12  -1  -6 9.66104 5.11485   1
 -12  -1  -6 13.1808 7.82101   2
 -12   1  -6 5.82329 6.85788   2
  12   1   6 11.8445 6.86075   1
 -13  -1  -6 -3.3680 5.74748   2
 -13  -1  -6 -5.1878 4.25342   1
 -13   1  -6 -1.7557 6.44269   2
  13  -2  -6 15.4662 7.26843   1
  13  -2  -6 18.2561 8.56678   3
  13   2  -6 23.2852 7.06273   1
  12  -2  -6 -2.3442 4.40725   1
  12   2  -6 0.37786 4.13002   1
  11  -2  -6 -1.1605 4.35013   1
  11   2  -6 -1.3365 3.99154   1
  11   2  -6 10.8679 4.81129   3
  10  -2  -6 57.4513 8.67208   1
  10   2  -6 102.114 10.4182   1
  10   2  -6 80.8847 9.48006   3
   9  -2  -6 149.894 11.6474   1
   9   2  -6 162.592 10.5218   1
   9   2  -6 156.524 11.1108   3
   8  -2  -6 180.873 11.7692   1
   8   2  -6 191.476 11.7038   3
   8   2  -6 185.124 10.3436   1
   7  -2  -6 163.663 10.8487   1
   7   2  -6 143.271 10.2266   3
   7   2  -6 173.288 9.03039   1
  -7   2   6 159.620 11.2122   4
   6  -2  -6 56.3700 7.29055   1
  -6   2   6 38.1702 6.30217   4
   6   2  -6 42.8752 4.99959   1
   6   2  -6 52.6801 7.35050   3
   5  -2  -6 274.208 11.8297   1
  -5   2   6 289.407 12.3036   4
   5   2  -6 278.674 13.1017   3
   5   2  -6 290.814 8.47015   1
   4  -2  -6 713.113 18.2812   1
   4   2  -6 731.487 20.9951   3
  -4   2   6 732.738 19.0299   4
   3  -2  -6 5.58462 3.37742   2
   3  -2  -6 0.03148 2.31869   1
  -3   2   6 -1.6588 2.63195   4
   3   2  -6 9.26967 3.94554   3
   2  -2  -6 356.397 13.7788   2
   2  -2  -6 373.517 11.5951   1
  -2   2   6 391.746 12.7670   1
  -2   2   6 361.866 11.8172   4
   2   2  -6 388.018 14.8433   3
   1  -2  -6 285.169 12.2399   2
   1  -2  -6 267.993 12.4446   3
   1  -2  -6 281.815 9.46546   1
  -1   2   6 299.511 10.1976   4
  -1   2   6 269.836 10.2533   1
   1   2  -6 297.479 9.82442   2
   0  -2  -6 1668.39 32.9793   2
   0  -2  -6 1714.65 33.5481   3
   0  -2  -6 1684.66 28.0210   1
   0   2   6 1701.49 29.7525   1
   0   2  -6 1682.14 27.9444   2
   0   2   6 1669.37 28.7674   4
  -1  -2  -6 199.693 10.3150   2
  -1  -2  -6 191.345 9.97553   3
  -1  -2  -6 219.583 8.13328   1
   1   2   6 207.040 8.44284   4
   1   2   6 198.223 8.69535   1
  -1   2  -6 208.738 7.86954   2
  -2  -2  -6 320.761 10.1004   1
  -2  -2  -6 319.691 13.1287   2
  -2  -2  -6 305.536 12.0093   3
  -2   2  -6 314.833 10.1833   2
   2   2   6 305.963 10.9282   1
   2   2   6 322.265 10.6343   4
  -3  -2  -6 892.238 20.8830   3
  -3  -2  -6 888.309 18.6881   1
  -3  -2  -6 848.540 23.2555   2
  -3   2  -6 898.722 19.4459   2
   3   2   6 901.139 20.4635   1
  -3   2  -6 873.079 15.0305   4
   3   2   6 897.608 19.5478   4
  -4  -2  -6 42.9840 5.65010   3
  -4  -2  -6 39.0061 4.92493   1
  -4  -2  -6 33.8567 6.22765   2
  -4   2  -6 49.7777 6.07501   2
   4   2   6 44.7382 5.40244   4
  -4   2  -6 38.0308 3.90267   4
   4   2   6 40.7008 5.51648   1
  -5  -2  -6 101.946 7.23169   1
  -5  -2  -6 101.499 10.0200   2
   5   2   6 116.855 7.85417   4
  -5   2  -6 106.028 7.91937   2
   5   2   6 118.994 8.51010   1
   6  -2   6 4.08847 3.19189   1
  -6  -2  -6 8.19187 3.62947   1
  -6  -2  -6 -3.2741 3.36003   2
  -6   2  -6 0.07768 3.37502   2
   6   2   6 2.97413 3.69276   1
   6   2   6 -0.3232 3.06771   4
   7  -2   6 499.081 16.4111   1
  -7  -2  -6 511.395 21.3305   2
  -7  -2  -6 514.717 16.5713   1
   7   2   6 509.899 17.2323   4
  -7   2  -6 543.773 19.3079   2
   7   2   6 510.520 18.5931   1
  -8  -2  -6 13.2626 4.71575   1
  -8  -2  -6 20.1055 7.27449   2
  -8   2  -6 9.59219 5.26052   2
   8   2   6 16.0758 5.58008   1
   8   2   6 2.79293 4.39431   4
  -9  -2  -6 212.422 15.7312   2
  -9  -2  -6 198.198 12.0353   1
  -9   2  -6 186.734 13.5730   2
   9   2   6 233.362 14.2458   1
 -10  -2  -6 84.8251 9.50197   1
 -10  -2  -6 79.0673 12.0919   2
 -10   2  -6 72.4741 10.9200   2
  10   2   6 82.1689 10.8385   1
 -11  -2  -6 23.5329 8.55202   2
 -11  -2  -6 31.2987 7.00528   1
 -11   2  -6 36.6769 8.86537   2
  11   2   6 13.2121 6.37463   1
 -12  -2  -6 99.4101 10.9503   1
 -12  -2  -6 75.4822 12.8360   2
  12   2   6 84.1395 11.7106   1
 -12   2  -6 89.7520 12.9348   2
 -13  -2  -6 59.5008 12.6993   2
 -13  -2  -6 78.5245 10.7712   1
 -13   2  -6 93.2795 14.1332   2
  13   2   6 88.6546 14.0707   1
  13  -3  -6 77.0248 11.8757   1
  13   3  -6 88.1643 11.6551   1
  12  -3  -6 11.8753 6.21506   1
  12   3  -6 14.7630 5.73216   1
  11  -3  -6 58.4325 9.76582   1
  11   3  -6 56.9289 8.78675   1
  10  -3  -6 26.6024 7.03076   1
  10   3  -6 30.2379 6.64062   1
  10   3  -6 23.1276 6.24517   3
   9  -3  -6 1347.71 34.8053   1
   9   3  -6 1361.93 32.4294   3
   9   3  -6 1299.08 29.4714   1
   8  -3  -6 19.0887 6.03447   1
  -8   3   6 17.6765 6.06807   4
   8   3  -6 21.8201 4.96068   1
   8   3  -6 19.1628 5.81167   3
   7  -3  -6 15.6470 5.02454   1
   7   3  -6 5.67372 3.27173   1
   7   3  -6 11.9594 4.68147   3
  -7   3   6 14.6966 5.16001   4
   6  -3  -6 266.109 12.9682   1
  -6   3   6 289.585 13.8821   4
   6   3  -6 279.205 13.6052   3
   6   3  -6 260.419 8.89542   1
   5  -3  -6 150.871 9.62473   1
  -5   3   6 152.345 9.97949   4
   5   3  -6 155.089 10.3552   3
   4  -3  -6 250.517 12.8707   2
   4  -3  -6 259.809 11.6403   1
  -4   3   6 247.595 11.9122   4
   3  -3  -6 226.462 11.9867   2
   3  -3  -6 228.919 10.3917   1
  -3   3   6 233.211 10.8138   4
   2  -3  -6 361.421 12.5244   1
   2  -3  -6 354.372 14.3160   2
  -2   3   6 363.204 12.9155   4
   1  -3  -6 200.238 9.25067   1
   1  -3  -6 206.157 11.0096   2
  -1   3   6 212.405 9.73953   4
  -1   3   6 221.314 10.1037   1
   0  -3  -6 195.146 10.5811   2
   0  -3  -6 175.947 8.63747   1
   0   3   6 189.632 9.32691   1
   0   3  -6 180.770 6.70095   2
   0   3   6 192.726 9.14093   4
  -1  -3  -6 214.173 10.9976   3
  -1  -3  -6 228.405 11.5431   2
  -1  -3  -6 210.727 9.34782   1
   1   3   6 223.077 9.80727   4
  -1   3  -6 224.337 7.36666   2
   1   3   6 224.100 10.1059   1
  -2  -3  -6 556.064 18.3381   2
  -2  -3  -6 547.252 16.4348   3
  -2  -3  -6 533.186 15.1046   1
   2   3   6 557.995 16.3175   1
   2   3   6 541.831 15.8108   4
  -2   3  -6 547.533 12.6774   2
  -3  -3  -6 27.3176 5.10889   3
  -3  -3  -6 23.3202 5.40758   2
  -3  -3  -6 18.7960 4.08496   1
  -3   3  -6 23.5651 2.32367   4
   3   3   6 13.4016 4.03240   1
  -3   3  -6 20.9440 3.38529   2
  -3   3  -6 21.9507 2.34303   4
   3   3   6 17.5041 4.12260   4
  -4  -3  -6 834.197 20.6788   1
  -4  -3  -6 770.620 23.7800   2
  -4  -3  -6 827.219 19.5628   3
  -4   3  -6 820.520 15.9857   4
   4   3   6 829.879 20.9127   4
  -4   3  -6 815.848 15.7622   4
   4   3   6 858.280 22.0259   1
  -4   3  -6 843.130 18.9297   2
  -5  -3  -6 570.211 20.8839   2
  -5  -3  -6 572.953 17.3839   1
  -5  -3  -6 583.669 15.4116   3
   5   3   6 563.587 17.4852   4
   5   3   6 570.868 18.3710   1
  -5   3  -6 562.319 14.4025   4
  -5   3  -6 582.989 16.6155   2
  -6  -3  -6 161.128 10.1849   1
  -6  -3  -6 171.756 12.7040   2
   6   3   6 158.305 10.2622   4
   6   3   6 183.631 11.3528   1
  -6   3  -6 173.310 10.0611   2
  -7  -3  -6 30.0551 7.47226   2
  -7  -3  -6 26.2574 6.15235   1
   7   3   6 20.9913 5.37731   4
  -7   3  -6 31.1534 6.33891   2
   7   3   6 35.8526 7.12015   1
  -8  -3  -6 45.4087 9.01742   2
  -8  -3  -6 45.4893 7.58877   1
   8   3   6 70.3180 8.87988   4
   8   3   6 48.9642 7.89742   1
  -8   3  -6 60.3432 8.54448   2
  -9  -3  -6 3.70238 5.81418   2
  -9  -3  -6 5.11728 4.68670   1
  -9   3  -6 7.74750 5.22000   2
   9   3   6 1.93381 4.57015   1
 -10  -3  -6 -1.1468 4.44411   1
 -10  -3  -6 0.28588 5.33990   2
 -10   3  -6 -3.5224 4.30167   2
  10   3   6 7.23540 5.85739   1
 -11  -3  -6 2.87887 4.63913   1
 -11  -3  -6 13.6089 7.10655   2
 -11   3  -6 4.85692 5.47042   2
  11   3   6 -0.3182 5.52719   1
 -12  -3  -6 1.31761 5.08176   1
 -12  -3  -6 8.09128 7.58071   2
 -12   3  -6 1.32801 5.51401   2
  12   3   6 -5.0224 4.88884   1
 -13  -3  -6 25.5858 7.40453   1
 -13  -3  -6 37.7965 11.0170   2
 -13   3  -6 37.9082 9.72674   2
  13   3   6 32.9255 9.79937   1
  13  -4  -6 24.0369 8.09927   1
  13   4  -6 22.2464 6.56188   1
  12  -4  -6 1.33437 5.07403   1
  12   4  -6 -0.2021 4.33009   1
  11  -4  -6 7.10338 5.47717   1
  11   4  -6 3.05066 4.27652   1
  10  -4  -6 22.1993 6.84239   1
  10   4  -6 31.1966 6.29100   1
 -10   4   6 31.6922 8.41554   4
   9  -4  -6 6.81259 5.00309   1
   9   4  -6 5.91628 3.78795   1
  -9   4   6 1.20195 5.03440   4
   8  -4  -6 726.569 24.2776   1
   8   4  -6 732.048 18.4989   1
  -8   4   6 730.328 24.7280   4
   7  -4  -6 215.773 13.2358   1
   7   4  -6 198.111 8.48328   1
  -7   4   6 196.830 12.9829   4
   6  -4  -6 477.610 18.0946   1
  -6   4   6 442.345 17.8490   4
   5  -4  -6 126.566 11.6365   1
  -5   4   6 133.964 11.2914   4
   4  -4  -6 294.098 13.0285   1
   4  -4  -6 283.629 14.1920   2
  -4   4   6 258.259 12.7299   4
   3  -4  -6 3.02068 3.35174   1
   3  -4  -6 2.37545 3.59596   2
  -3   4   6 -0.8641 2.93604   4
   2  -4  -6 290.460 13.5405   2
   2  -4  -6 276.977 12.0443   1
  -2   4   6 274.401 12.1858   4
   1  -4  -6 613.031 17.6939   1
   1  -4  -6 624.776 19.8171   2
  -1   4   6 572.641 17.8311   1
  -1   4   6 631.559 18.2547   4
   0  -4  -6 135.239 9.59505   2
   0  -4  -6 153.986 8.95950   1
   0   4   6 162.268 9.44768   1
   0   4   6 156.038 9.26741   4
  -1  -4  -6 220.542 10.5560   1
  -1  -4  -6 216.307 11.9583   2
  -1   4  -6 217.969 5.96771   2
   1   4   6 217.547 10.7954   4
  -2  -4  -6 136.355 10.1168   2
  -2  -4  -6 138.621 8.83270   1
   2   4   6 167.596 9.70958   1
   2   4   6 146.098 9.39566   4
  -2   4  -6 144.481 5.27719   2
  -3  -4  -6 78.2643 7.93864   3
  -3  -4  -6 77.6656 8.26521   1
  -3  -4  -6 65.4870 8.38387   2
   3   4   6 69.3586 7.30950   1
   3   4   6 56.3351 7.03852   4
  -3   4  -6 62.3895 3.51547   4
  -3   4  -6 62.8334 4.33376   2
  -4  -4  -6 127.361 8.10462   3
  -4  -4  -6 124.755 11.6768   2
  -4  -4  -6 120.632 9.14040   1
   4   4   6 128.149 9.59596   1
   4   4   6 118.161 8.99257   4
  -4   4  -6 131.935 6.78603   2
  -4   4  -6 132.932 6.09045   4
  -5  -4  -6 -0.3508 3.47597   1
  -5  -4  -6 -2.4860 2.77384   3
  -5  -4  -6 8.81843 4.72556   2
   5   4   6 1.85395 3.91961   4
  -5   4  -6 -2.7950 2.11351   4
  -5   4  -6 0.19366 2.59357   2
   5   4   6 4.80197 3.76200   1
  -6  -4  -6 4.90784 2.98224   3
  -6  -4  -6 5.06472 4.54987   1
  -6  -4  -6 10.7281 5.45973   2
   6   4   6 -4.2463 3.37409   1
  -6   4  -6 10.0309 3.38207   4
  -6   4  -6 6.21712 3.53027   2
   6   4   6 11.0539 4.74776   4
  -7  -4  -6 509.136 22.4364   2
  -7  -4  -6 521.037 19.2672   1
  -7   4  -6 500.403 16.7408   4
   7   4   6 489.055 18.9496   4
  -7   4  -6 516.411 17.5277   2
   7   4   6 533.153 20.5516   1
  -8  -4  -6 713.696 23.2370   1
  -8  -4  -6 688.109 26.8609   2
   8   4   6 641.399 23.5314   1
   8   4   6 640.975 22.5413   4
  -8   4  -6 698.469 22.0767   2
  -9  -4  -6 183.449 13.1928   1
  -9  -4  -6 207.558 16.3230   2
   9   4   6 184.811 20.1313   4
  -9   4  -6 193.836 13.1554   2
   9   4   6 197.829 17.5461   1
 -10  -4  -6 23.3903 7.34993   1
 -10  -4  -6 21.4882 7.62910   2
  10   4   6 16.9657 6.47395   1
 -10   4  -6 23.5732 6.82694   2
 -11  -4  -6 80.2628 13.5601   2
 -11  -4  -6 79.3806 11.4381   1
 -11   4  -6 69.1919 11.0061   2
  11   4   6 75.8669 11.9301   1
 -12  -4  -6 46.4042 11.4691   2
 -12  -4  -6 44.9595 8.94026   1
  12   4   6 49.4981 11.4200   1
 -12   4  -6 31.6850 8.94464   2
  12  -5  -6 -1.9611 5.97952   1
  12   5  -6 -0.8290 3.95406   1
  12   5  -6 -5.3245 5.17838   4
  11  -5  -6 77.0708 11.2857   1
  11   5  -6 80.2248 9.25618   1
 -11   5   6 102.545 13.7885   4
  10  -5  -6 24.3119 7.29517   1
 -10   5   6 21.7855 7.20409   4
  10   5  -6 34.8517 6.17979   1
   9  -5  -6 37.5066 8.01131   1
  -9   5   6 42.1858 8.67491   4
   9   5  -6 36.0896 5.84536   1
   8  -5  -6 246.645 15.2067   1
  -8   5   6 313.476 17.1331   4
   8   5  -6 299.331 10.7831   1
   7  -5  -6 207.537 13.5565   1
  -7   5   6 180.486 13.2211   4
   6  -5  -6 303.964 15.3265   1
  -6   5   6 278.351 15.3379   4
   5  -5  -6 1.95972 3.89555   1
  -5   5   6 2.43736 4.01264   4
   4  -5  -6 19.9478 6.00472   1
   4  -5  -6 10.1251 4.93214   2
  -4   5   6 4.63887 4.50147   4
   3  -5  -6 671.263 21.0171   1
   3  -5  -6 723.999 23.0164   2
  -3   5   6 738.757 22.0713   4
   2  -5  -6 78.2157 9.10696   2
   2  -5  -6 82.3540 8.94316   1
  -2   5   6 80.6412 8.39260   4
   1  -5  -6 624.420 19.1261   1
   1  -5  -6 601.275 20.5225   2
  -1   5   6 634.171 19.7752   1
  -1   5   6 586.648 19.0786   4
   0  -5  -6 80.9026 8.53338   1
   0  -5  -6 73.2352 8.91925   2
   0   5   6 83.2013 8.11322   1
   0   5   6 86.6103 8.71530   4
  -1  -5  -6 161.115 11.0233   2
  -1  -5  -6 182.588 10.6361   1
   1   5   6 158.757 10.3082   4
   1   5   6 172.332 10.5166   1
  -2  -5  -6 292.044 15.0357   2
  -2  -5  -6 291.099 13.2628   1
   2   5   6 306.314 14.0171   4
   2   5   6 306.363 13.8203   1
  -3  -5  -6 109.993 10.3531   1
  -3  -5  -6 105.296 10.7390   2
   3   5   6 146.671 10.3979   4
   3   5   6 119.928 9.59750   1
  -3   5  -6 128.393 5.37775   4
  -4  -5  -6 -1.7659 3.99560   2
  -4  -5  -6 6.34342 4.25009   3
  -4  -5  -6 5.42839 4.14953   1
   4   5   6 1.53281 3.87643   4
   4   5   6 7.36199 4.34846   1
  -4   5  -6 7.55046 2.70965   4
  -4   5  -6 9.15007 2.45771   2
  -5  -5  -6 168.898 11.7960   1
  -5  -5  -6 192.430 13.4859   2
  -5  -5  -6 164.901 8.94666   3
  -5   5  -6 179.058 8.45332   4
   5   5   6 159.178 11.4686   4
   5   5   6 163.629 11.6873   1
  -5   5  -6 169.213 7.82238   2
  -6  -5  -6 4.46025 2.75534   3
  -6  -5  -6 -1.2880 4.68632   2
  -6  -5  -6 -4.5528 3.78823   1
   6   5   6 -3.4646 3.61353   1
  -6   5  -6 0.50269 3.04298   2
   6   5   6 -8.6585 4.02039   4
  -6   5  -6 -7.3816 2.36822   4
  -7  -5  -6 17.8588 7.20964   2
  -7  -5  -6 21.6711 6.27029   1
   7   5   6 12.9121 5.96987   4
   7   5   6 15.5225 5.82069   1
  -7   5  -6 9.81622 4.18425   2
  -7   5  -6 16.7776 4.57339   4
  -8  -5  -6 16.2677 6.70517   2
  -8  -5  -6 17.3964 6.54209   1
  -8   5  -6 19.7610 5.32908   4
   8   5   6 13.1184 6.02832   4
  -8   5  -6 14.2622 5.15574   2
   8   5   6 14.7426 6.00246   1
  -9  -5  -6 138.664 15.6429   2
  -9  -5  -6 180.949 13.8099   1
  -9   5  -6 178.161 12.3741   2
   9   5   6 159.942 15.0862   1
   9   5   6 157.987 14.5975   4
 -10  -5  -6 31.2248 7.84262   1
 -10  -5  -6 30.0256 9.20577   2
  10   5   6 22.8740 7.80946   1
 -10   5  -6 23.3125 6.71349   2
 -11  -5  -6 16.4327 8.24374   2
 -11  -5  -6 19.9879 7.66291   1
 -11   5  -6 13.8253 6.60463   2
  11   5   6 -2.2572 6.06575   1
 -12  -5  -6 12.8018 8.30154   2
 -12  -5  -6 17.2510 7.44035   1
 -12   5  -6 2.35705 5.88037   2
  12   5   6 0.14377 6.14714   1
  12  -6  -6 14.5696 7.20205   1
  12   6  -6 12.0731 5.41186   1
  12   6  -6 1.15898 6.33699   4
 -12   6   6 2.45694 7.22352   4
  11  -6  -6 71.8445 11.0725   1
  11   6  -6 58.5583 10.3576   4
  11   6  -6 61.6165 7.92895   1
 -11   6   6 60.7456 11.2209   4
  10  -6  -6 161.990 16.5971   1
  10   6  -6 147.115 14.6858   4
 -10   6   6 109.542 13.3229   4
  10   6  -6 110.300 8.34871   1
   9  -6  -6 8.71103 5.68824   1
   9   6  -6 15.7341 6.62667   4
   9   6  -6 14.0934 3.76514   1
  -9   6   6 11.0351 6.09002   4
   8  -6  -6 27.4403 7.76549   1
   8   6  -6 20.4878 6.41356   4
  -8   6   6 36.9905 8.43580   4
   7  -6  -6 346.699 17.7508   1
  -7   6   6 343.036 18.4467   4
   6  -6  -6 405.608 18.2694   1
  -6   6   6 392.324 18.3679   4
   5  -6  -6 3.86807 4.70181   1
  -5   6   6 3.53190 4.29596   4
   4  -6  -6 186.218 12.6764   2
   4  -6  -6 146.039 11.4191   1
  -4   6   6 141.438 12.6015   4
   3  -6  -6 18.2891 5.51085   1
   3  -6  -6 12.2198 5.30260   2
  -3   6   6 2.24572 4.04941   4
   2  -6  -6 41.7529 7.09384   1
   2  -6  -6 40.0617 7.13784   2
   2   6  -6 53.1466 5.38587   4
  -2   6   6 41.6693 7.23258   4
   1  -6  -6 57.4816 8.33587   2
   1  -6  -6 59.1239 8.21000   1
  -1   6   6 59.8587 8.29154   4
   1   6  -6 48.8842 4.69839   4
   0  -6  -6 13.7251 5.14682   1
   0  -6  -6 23.6457 5.98536   2
   0   6   6 21.9629 5.73315   4
   0   6  -6 14.9705 2.81225   4
   0   6   6 12.3428 5.50788   1
  -1  -6  -6 22.3528 6.20808   2
  -1  -6  -6 23.5368 5.71385   1
   1   6   6 37.4412 6.98386   4
  -1   6  -6 28.7064 3.29294   4
   1   6   6 29.2635 6.76931   1
  -2  -6  -6 56.7673 8.84117   2
  -2  -6  -6 48.5163 8.01457   1
   2   6   6 59.3761 8.39518   1
  -2   6  -6 62.6865 4.46191   4
   2   6   6 68.4503 9.05137   4
  -3  -6  -6 227.888 14.3748   2
  -3  -6  -6 213.430 13.1175   1
   3   6   6 221.942 13.2131   4
  -3   6  -6 214.800 8.05192   4
   3   6   6 219.038 12.9422   1
  -4  -6  -6 1.35533 4.60573   2
  -4  -6  -6 2.22645 4.63516   1
  -4   6  -6 -0.1940 2.55684   4
   4   6   6 0.81332 3.74373   1
   4   6   6 -1.6590 4.09535   4
  -5  -6  -6 57.6195 6.89542   3
  -5  -6  -6 37.4864 7.24886   1
  -5  -6  -6 61.6969 9.78838   2
  -5   6  -6 55.2642 6.00350   4
   5   6   6 61.3785 8.96256   4
  -5   6  -6 51.6612 4.65107   2
   5   6   6 47.8039 7.82863   1
  -6  -6  -6 58.4079 6.04707   3
  -6  -6  -6 53.5203 8.55719   1
  -6  -6  -6 53.5435 9.37301   2
  -6   6  -6 58.2609 6.93508   4
   6   6   6 33.2123 7.47108   1
   6   6   6 54.3760 8.95089   4
  -6   6  -6 61.8741 5.98027   2
  -7  -6  -6 5.76407 4.88839   1
  -7  -6  -6 2.80671 5.47077   2
  -7   6  -6 7.32954 3.96606   4
  -7   6  -6 6.16492 3.59566   2
   7   6   6 8.17297 5.60693   1
   7   6   6 1.30018 5.26598   4
  -8  -6  -6 221.143 16.9744   2
  -8  -6  -6 230.658 15.4193   1
  -8   6  -6 222.297 12.7006   4
   8   6   6 261.293 16.2818   4
   8   6   6 230.300 15.7503   1
  -8   6  -6 260.151 12.4048   2
  -9  -6  -6 21.9382 7.23213   1
  -9  -6  -6 18.0795 8.12314   2
  -9   6  -6 18.3512 5.69721   4
  -9   6  -6 24.9888 5.90367   2
   9   6   6 4.57224 6.25552   1
   9   6   6 16.1935 7.38783   4
 -10  -6  -6 34.9698 9.88023   2
 -10  -6  -6 64.8667 10.8855   1
 -10   6  -6 65.2617 13.8645   2
  10   6   6 75.8843 12.6523   1
 -11  -6  -6 -2.1841 6.04758   2
 -11  -6  -6 5.09699 6.08012   1
  11   6   6 -1.1911 6.07982   1
  11  -7  -6 1.34807 5.94469   1
 -11  -7   6 3.12119 6.50089   2
  11   7  -6 5.72550 3.99261   1
  11   7  -6 6.88720 6.89879   4
 -11   7   6 8.93959 7.14078   4
  10  -7  -6 27.5560 8.22295   1
 -10   7   6 35.7158 9.22635   4
  10   7  -6 34.1115 8.69885   4
   9  -7  -6 124.187 13.6270   1
  -9   7   6 121.718 14.5705   4
   9   7  -6 124.387 13.5056   4
   8  -7  -6 5.31118 5.84804   1
   8   7  -6 4.16961 4.98992   4
  -8   7   6 1.12242 5.67237   4
   7  -7  -6 66.0268 9.70405   1
   7   7  -6 66.6636 9.15678   4
  -7   7   6 84.6690 11.6140   4
   6  -7  -6 11.2694 5.86333   1
   6   7  -6 14.2087 5.15840   4
  -6   7   6 14.8913 6.69804   4
  -5  -7   6 29.5256 5.96945   2
   5  -7  -6 34.4129 7.76073   1
  -5   7   6 39.2865 8.31135   4
   5   7  -6 39.3141 6.69470   4
   4  -7  -6 9.69583 5.66405   1
  -4  -7   6 2.84385 3.26105   2
   4  -7  -6 8.22127 4.91246   2
  -4   7   6 -0.9825 4.54728   4
   4   7  -6 0.94426 3.65809   4
  -3  -7   6 3.32677 2.53769   2
   3  -7  -6 12.7061 5.35305   1
   3  -7  -6 7.32457 4.95367   2
  -3   7   6 7.01680 4.96643   4
   3   7  -6 2.47097 3.19838   4
   2  -7  -6 101.476 10.9212   2
   2  -7  -6 103.220 11.4820   1
  -2   7   6 87.2680 10.5722   4
   2   7  -6 96.0540 7.18176   4
   1  -7  -6 64.6149 9.02268   2
   1  -7  -6 57.4234 9.15589   1
  -1   7   6 62.9793 8.78583   4
   1   7  -6 64.4684 6.09377   4
   0  -7  -6 697.015 23.9768   2
   0  -7  -6 683.937 22.9645   1
   0   7   6 685.388 23.4407   4
   0   7  -6 693.430 16.0977   4
   0   7   6 694.050 23.2333   1
  -1  -7  -6 107.270 11.4009   2
  -1  -7  -6 106.093 11.6412   1
   1   7   6 117.848 11.1792   1
   1   7   6 99.8173 10.8387   4
  -1   7  -6 107.774 6.43038   4
  -2  -7  -6 296.293 15.6954   1
  -2  -7  -6 298.291 16.1859   2
   2   7   6 293.769 15.3646   1
   2   7   6 319.968 16.5827   4
  -2   7  -6 299.445 10.1392   4
  -3  -7  -6 134.868 13.6814   2
  -3  -7  -6 120.444 12.2249   1
  -3   7  -6 137.415 7.69193   4
   3   7   6 124.748 12.0461   4
   3   7   6 120.385 11.5715   1
  -4  -7  -6 819.524 28.0105   2
  -4  -7  -6 875.635 27.5211   1
  -4   7  -6 844.971 19.8574   4
   4   7   6 822.473 26.7394   1
   4   7   6 901.565 27.9406   4
  -5  -7  -6 5.43994 4.92675   1
  -5  -7  -6 -3.6759 4.24045   2
  -5   7  -6 -0.2852 2.99709   4
   5   7   6 -2.3657 3.85667   1
   5   7   6 0.40295 4.79436   4
  -6  -7  -6 144.668 14.4431   1
  -6  -7  -6 192.541 15.2102   2
  -6   7  -6 161.607 10.2357   4
   6   7   6 172.212 13.3157   1
   6   7   6 162.091 14.8425   4
  -7  -7  -6 20.3027 7.20951   1
  -7  -7  -6 31.9959 8.66109   2
   7   7   6 28.5173 7.66740   4
   7   7   6 11.0227 6.11994   1
  -7   7  -6 18.3151 5.54811   4
  -8  -7  -6 102.641 14.0353   2
  -8  -7  -6 98.2680 12.3385   1
  -8   7  -6 104.893 10.7175   4
   8   7   6 102.267 12.8203   4
   8   7   6 123.356 14.7792   1
  -9  -7  -6 249.808 19.6535   2
  -9  -7  -6 229.175 16.6329   1
  -9   7  -6 211.960 13.5816   4
   9   7   6 238.653 17.0866   1
   9   7   6 178.853 17.0887   4
 -10  -7  -6 35.7626 10.2544   2
 -10  -7  -6 29.8965 9.30892   1
 -10   7  -6 24.9200 7.03944   4
  10   7   6 36.7307 9.82250   1
 -11  -7  -6 8.62179 8.09836   2
 -11  -7  -6 1.09269 6.71098   1
  11   7   6 11.1597 7.38303   1
 -10  -8   6 162.146 16.7618   2
  10  -8  -6 189.706 18.1250   1
 -10   8   6 145.221 16.4024   4
  10   8  -6 125.930 14.9153   4
  -9  -8   6 16.3352 7.11698   2
   9  -8  -6 18.7279 7.84850   1
  -9   8   6 16.1657 7.37600   4
   9   8  -6 10.3695 6.59472   4
   8  -8  -6 27.9340 7.79267   1
  -8  -8   6 28.6183 7.79162   2
  -8   8   6 20.4502 8.18371   4
   8   8  -6 24.1840 7.19803   4
  -7  -8   6 152.234 11.8387   2
   7  -8  -6 159.830 15.6964   1
  -7   8   6 161.990 15.9208   4
   7   8  -6 148.129 13.7430   4
  -6  -8   6 288.216 14.1147   2
   6  -8  -6 330.519 18.4930   1
   6   8  -6 296.134 15.6954   4
  -6   8   6 328.588 18.7785   4
  -5  -8   6 125.308 9.56093   2
   5  -8  -6 154.675 14.6420   1
   5   8  -6 114.692 10.8431   4
  -5   8   6 132.374 13.7856   4
   4  -8  -6 317.832 17.4035   2
   4  -8  -6 355.745 18.1745   1
   4   8  -6 339.709 14.8850   4
  -4   8   6 345.088 18.3855   4
   3  -8  -6 8.52170 4.83986   2
   3  -8  -6 5.33813 5.21765   1
  -3   8   6 -1.4881 4.42575   4
   3   8  -6 5.65641 4.09657   4
   2  -8  -6 144.607 13.3205   2
   2  -8  -6 168.484 15.4851   1
   2   8  -6 130.189 8.85816   4
  -2   8   6 131.885 13.1293   4
   1  -8  -6 233.305 14.6985   2
   1  -8  -6 243.968 14.9098   1
  -1   8   6 221.486 15.0055   4
   1   8  -6 210.369 10.2937   4
   0  -8  -6 23.8857 7.38849   1
   0  -8  -6 21.2790 6.55127   2
   0   8  -6 21.3538 4.52450   4
   0   8   6 12.1639 6.14495   4
  -1  -8  -6 15.5614 6.36145   2
  -1  -8  -6 11.7897 5.36307   1
   1   8   6 6.72804 5.41949   4
  -1   8  -6 23.5828 4.61047   4
   1   8   6 26.4579 6.85512   1
  -2  -8  -6 471.885 20.8820   2
  -2  -8  -6 515.923 21.4435   1
   2   8   6 530.610 21.2660   1
   2   8   6 480.138 21.2580   4
  -2   8  -6 506.164 15.1426   4
  -3  -8  -6 471.018 21.4212   2
  -3  -8  -6 471.911 20.9007   1
  -3   8  -6 457.291 14.7373   4
   3   8   6 491.447 20.6451   1
   3   8   6 477.670 20.9484   4
  -4  -8  -6 14.2245 6.62029   2
  -4  -8  -6 16.1406 7.02858   1
   4   8   6 16.3507 6.46820   1
  -4   8  -6 21.9054 4.83537   4
   4   8   6 16.5844 6.86315   4
  -5  -8  -6 -0.0056 4.88735   2
  -5  -8  -6 6.78434 6.29453   1
  -5   8  -6 4.16795 3.81146   4
   5   8   6 12.9594 5.75630   1
   5   8   6 1.02156 5.29621   4
  -6  -8  -6 -7.1959 4.47253   2
  -6  -8  -6 3.21911 5.38824   1
   6   8   6 -2.1112 3.91463   1
   6   8   6 -6.7853 4.50276   4
  -6   8  -6 1.30461 3.37305   4
  -7  -8  -6 34.4725 8.86282   2
  -7  -8  -6 23.0236 7.30934   1
  -7   8  -6 29.2252 6.19460   4
   7   8   6 17.0630 6.92548   1
   7   8   6 21.8069 7.66233   4
  -8  -8  -6 22.5281 8.36559   1
  -8  -8  -6 36.4683 9.64288   2
   8   8   6 27.5403 8.66004   4
   8   8   6 25.0501 8.33593   1
  -8   8  -6 20.7185 6.24027   4
  -9  -8  -6 149.844 17.9699   2
  -9  -8  -6 102.409 13.0334   1
   9   8   6 134.798 15.9741   4
   9   8   6 97.7513 13.2629   1
  -9   8  -6 110.998 12.1552   4
 -10  -8  -6 18.4811 9.61857   2
 -10  -8  -6 33.8443 9.01622   1
 -10   8  -6 28.6063 7.47060   4
  10   8   6 29.9453 8.69955   1
   9  -9  -6 4.33161 5.82821   1
  -9   9   6 2.00698 6.35686   4
   9   9  -6 0.63637 5.79425   4
   8  -9  -6 22.5468 8.20498   1
   8   9  -6 18.0914 7.22432   4
  -8   9   6 20.0983 8.13868   4
   7  -9  -6 48.8215 9.94438   1
  -7   9   6 55.1727 10.7191   4
   7   9  -6 46.2824 8.81926   4
   6  -9  -6 146.443 15.0781   1
  -6   9   6 120.286 14.4690   4
   6   9  -6 109.642 12.0329   4
   5  -9  -6 3.77626 5.48376   1
   5   9  -6 14.5102 5.61760   4
  -5   9   6 14.2363 6.83089   4
   4  -9  -6 0.39297 5.04493   2
   4  -9  -6 0.55497 5.40840   1
   4   9  -6 -1.9188 3.49441   4
  -4   9   6 -6.2806 4.23809   4
   3  -9  -6 90.7586 11.6269   2
   3  -9  -6 71.7513 10.5885   1
  -3   9   6 74.1706 11.2576   4
   3   9  -6 79.8739 9.10547   4
   2  -9  -6 68.9963 10.1348   1
   2  -9  -6 90.3755 11.4330   2
   2   9  -6 72.8574 8.09501   4
  -2   9   6 63.1483 10.1987   4
   1  -9  -6 282.157 16.5242   2
   1  -9  -6 285.497 16.8525   1
  -1   9   6 266.952 16.9187   4
   1   9  -6 258.339 12.4924   4
   0  -9  -6 40.5901 8.74929   2
   0  -9  -6 57.8253 9.97571   1
   0   9  -6 41.8019 6.19009   4
   0   9   6 30.0529 7.79234   4
  -1  -9  -6 88.7191 11.3337   2
  -1  -9  -6 72.5138 10.0885   1
  -1   9  -6 101.596 8.76124   4
   1   9   6 95.3623 12.7525   4
  -2  -9  -6 328.185 18.1937   1
  -2  -9  -6 317.422 18.2506   2
   2   9   6 290.986 16.8035   1
  -2   9  -6 322.905 13.2485   4
   2   9   6 326.621 19.0001   4
  -3  -9  -6 151.215 15.3175   2
  -3  -9  -6 164.368 16.2424   1
   3   9   6 144.910 13.5769   1
  -3   9  -6 155.482 9.95498   4
   3   9   6 164.219 16.0186   4
  -4  -9  -6 224.019 16.1963   1
  -4  -9  -6 186.788 17.2676   2
   4   9   6 233.630 16.5167   4
  -4   9  -6 194.144 11.3527   4
   4   9   6 215.684 15.2426   1
  -5  -9  -6 292.798 18.3563   1
  -5  -9  -6 276.694 18.3670   2
   5   9   6 290.071 18.6559   4
  -5   9  -6 267.783 13.5700   4
   5   9   6 282.421 17.3501   1
  -6  -9  -6 38.0726 9.39710   1
  -6  -9  -6 31.3396 8.83120   2
   6   9   6 23.5821 6.95012   1
  -6   9  -6 36.7275 6.85015   4
   6   9   6 37.8127 9.23875   4
  -7  -9  -6 145.304 16.7719   1
  -7  -9  -6 125.944 15.5204   2
   7   9   6 144.953 16.0328   4
   7   9   6 129.647 14.5283   1
  -7   9  -6 138.883 12.2041   4
  -8  -9  -6 61.7471 12.0641   2
  -8  -9  -6 95.6442 14.5084   1
  -8   9  -6 93.5613 11.3315   4
   8   9   6 93.4435 13.5185   4
   8   9   6 73.5540 11.5928   1
  -9  -9  -6 9.41647 6.86133   1
  -9  -9  -6 5.12319 7.21329   2
  -9   9  -6 3.43252 4.70869   4
   9   9   6 3.70321 6.34718   1
   9   9   6 12.3632 7.83312   4
   8 -10  -6 -4.7836 5.86025   1
   8  10  -6 7.91102 6.22816   4
  -8  10   6 -0.0365 6.07390   4
   7 -10  -6 29.7223 9.78370   1
  -7  10   6 28.4937 9.24322   4
   7  10  -6 29.5831 8.15808   4
   6 -10  -6 -2.6327 4.83849   1
  -6  10   6 6.22809 6.18080   4
   6  10  -6 -3.6894 4.48866   4
   5 -10  -6 100.146 13.2999   1
  -5  10   6 107.117 13.4261   4
   5  10  -6 116.876 12.2247   4
   4 -10  -6 -7.1736 4.32176   1
   4 -10  -6 1.96386 4.44618   2
   4  10  -6 -0.1907 4.36742   4
  -4  10   6 6.48591 6.59743   4
   3 -10  -6 1.86780 5.39190   1
   3 -10  -6 1.79741 4.64348   2
   3  10  -6 1.34868 4.04840   4
  -3  10   6 1.38543 6.02485   4
   2 -10  -6 19.3107 7.06109   2
   2 -10  -6 31.6940 8.55005   1
   2  10  -6 34.6618 6.85705   4
  -2  10   6 39.5089 9.63481   4
   1 -10  -6 261.539 17.2096   1
   1 -10  -6 247.929 16.2332   2
   1  10  -6 238.222 13.1192   4
  -1  10   6 275.901 18.3514   4
   0 -10  -6 102.212 12.7388   2
   0 -10  -6 106.289 13.6938   1
   0  10   6 109.866 13.9051   4
   0  10  -6 91.3754 9.32999   4
  -1 -10  -6 109.352 14.7068   1
  -1 -10  -6 85.8249 11.5241   2
  -1  10  -6 85.1530 9.19345   4
   1  10   6 85.5819 12.7292   4
  -2 -10  -6 14.8292 6.26273   1
  -2 -10  -6 32.9441 8.45264   2
  -2  10  -6 31.1825 6.19430   4
   2  10   6 35.5005 9.08408   4
  -3 -10  -6 12.6416 6.43252   2
  -3 -10  -6 0.57676 5.11971   1
  -3  10  -6 13.0366 4.98204   4
   3  10   6 6.77425 6.38982   4
   3  10   6 13.6378 6.43459   1
  -4 -10  -6 16.4189 7.38696   2
  -4 -10  -6 9.77140 6.47299   1
   4  10   6 15.9144 7.28075   1
  -4  10  -6 23.1156 6.04631   4
   4  10   6 7.05277 6.38624   4
  -5 -10  -6 92.1050 13.0260   2
  -5 -10  -6 69.5294 11.1778   1
   5  10   6 85.2028 11.8913   1
  -5  10  -6 100.662 10.4781   4
   5  10   6 74.7538 12.4360   4
  -6 -10  -6 -2.5826 5.22267   2
  -6 -10  -6 12.8809 7.96156   1
  -6  10  -6 5.60548 5.01369   4
   6  10   6 -4.7939 5.83237   4
   6  10   6 9.82259 6.59326   1
  -7 -10  -6 65.7179 12.7630   1
  -7 -10  -6 66.7662 12.2207   2
   7  10   6 73.9891 11.8915   1
  -7  10  -6 76.1661 10.0152   4
   7  10   6 81.0072 12.9776   4
   6 -11  -6 4.04531 6.25379   1
  -6  11   6 5.39145 7.60383   4
   6  11  -6 24.1425 7.70272   4
   5 -11  -6 54.6896 10.9246   1
   5  11  -6 62.3418 10.3471   4
  -5  11   6 65.9911 12.3962   4
   4 -11  -6 16.2961 7.19829   1
   4  11  -6 4.32280 5.12112   4
  -4  11   6 26.9096 9.03602   4
   3 -11  -6 25.0130 7.44298   2
   3 -11  -6 26.5880 8.78503   1
   3  11  -6 23.6244 6.89010   4
  -3  11   6 17.6954 8.14848   4
   2 -11  -6 103.559 12.9212   2
   2 -11  -6 78.3093 11.8189   1
   2  11  -6 104.097 11.3569   4
  -2  11   6 79.8741 12.4000   4
   1 -11  -6 212.551 16.8930   1
  -1  11   6 156.583 16.9975   4
   1  11  -6 154.371 13.1894   4
   0 -11  -6 43.9720 9.11477   1
   0 -11  -6 49.7443 9.51544   2
   0  11  -6 64.2087 9.20906   4
   0  11   6 80.7073 13.2641   4
  -1 -11  -6 7.00756 6.20385   2
  -1 -11  -6 -0.1666 5.56413   1
  -1  11  -6 2.86251 4.51216   4
   1  11   6 4.05232 6.76419   4
  -2 -11  -6 253.022 18.3614   1
  -2 -11  -6 220.807 16.6077   2
   2  11   6 268.345 19.8427   4
  -2  11  -6 233.406 13.9353   4
  -3 -11  -6 254.699 17.9998   2
  -3 -11  -6 268.444 18.9160   1
   3  11   6 278.969 20.2586   4
  -3  11  -6 236.137 14.0048   4
  -4 -11  -6 95.8672 13.3628   2
  -4 -11  -6 100.625 14.6180   1
  -4  11  -6 91.9248 10.6631   4
   4  11   6 106.074 13.7031   1
   4  11   6 91.5613 13.9823   4
  -5 -11  -6 89.0589 13.5854   2
  -5 -11  -6 106.608 14.5924   1
  -5  11  -6 112.873 11.8175   4
   5  11   6 105.340 14.2322   1
   5  11   6 122.378 16.0669   4
   2 -12  -6 -4.4819 5.68915   1
   2 -12  -6 4.11142 5.67828   2
   2  12  -6 -5.6788 4.87734   4
  -2  12   6 -1.2843 6.18870   4
   1 -12  -6 2.52757 7.39640   1
   1 -12  -6 -1.5593 5.23199   2
  -1  12   6 -5.5602 5.98286   4
   1  12  -6 5.27282 5.53287   4
   0 -12  -6 -1.1063 6.13865   1
   0 -12  -6 2.60435 5.98298   2
   0  12  -6 1.01010 5.25773   4
   0  12   6 -4.8070 6.02951   4
  -1 -12  -6 45.9916 10.1634   2
  -1 -12  -6 45.9744 10.0041   1
  -1  12  -6 50.6402 8.68159   4
   1  12   6 29.1521 9.76940   4
  -2 -12  -6 -0.1573 5.69207   2
  -2 -12  -6 7.80583 6.57427   1
   2  12   6 2.13522 7.01109   4
  -2  12  -6 6.43803 5.27618   4
  13   0  -7 417.822 20.8133   1
  12   0  -7 -5.4732 3.88136   1
  12   0  -7 -6.2978 4.21096   3
  11   0  -7 207.375 13.9575   1
  11   0  -7 235.498 15.4474   3
  10   0  -7 4.46505 4.14817   1
  10   0  -7 2.03441 4.79338   3
   9   0  -7 849.942 24.3693   1
   9   0  -7 816.813 27.1575   3
   8   0  -7 -0.9631 3.57202   1
   8   0  -7 -1.0569 4.46280   3
   7   0  -7 418.478 18.2324   3
   7   0  -7 426.662 15.0377   1
   6   0  -7 -2.6910 2.47588   1
   6   0  -7 2.92988 4.51400   3
   5   0  -7 3104.77 47.0354   1
   5   0  -7 3145.19 56.6716   3
   5   0  -7 3167.21 47.1282   1
   4   0  -7 -1.4631 1.66030   1
   4   0  -7 1.02429 2.14477   1
   4   0  -7 -1.3298 3.46837   3
   3   0  -7 822.095 23.6703   3
   3   0  -7 876.570 14.7782   1
   2   0  -7 -3.2127 3.02610   3
   2   0  -7 -1.5610 2.66499   2
  -2   0   7 0.96760 2.13030   1
   1   0  -7 1846.99 34.5056   2
   1   0  -7 1853.78 37.4524   3
   0   0  -7 0.98740 3.00311   3
   0   0  -7 2.58282 2.84405   2
  -1   0  -7 792.837 20.2375   2
  -1   0  -7 786.147 21.7814   3
  -2   0  -7 -2.5690 2.32785   2
  -2   0  -7 0.74524 3.25170   3
  -3   0  -7 85.6434 8.11647   2
  -4   0  -7 -5.4675 2.61438   2
   4   0   7 -1.7935 2.30913   1
   5   0   7 -0.0436 2.75762   1
  -5   0  -7 10.7703 4.77504   2
   6   0   7 3.02672 3.31990   1
  -6   0  -7 1.49761 4.00827   2
   7   0   7 173.079 10.8090   1
  -7   0  -7 175.734 12.5080   2
   8   0   7 2.24505 3.91706   1
  -8   0  -7 0.54207 4.73639   2
  -9   0  -7 70.9616 10.7128   2
 -10   0  -7 -6.6763 4.50688   2
 -11   0  -7 44.0460 9.96666   2
 -12   0  -7 6.60303 6.16828   2
 -13   0  -7 184.571 19.2939   2
  13  -1  -7 74.1676 11.3679   1
  13  -1  -7 95.4028 12.9736   3
  13   1  -7 86.0891 11.9900   1
  12  -1  -7 41.8616 9.38036   3
  12  -1  -7 40.5059 8.24241   1
  12   1  -7 40.6663 8.45903   3
  12   1  -7 32.3750 7.72725   1
  11  -1  -7 25.7180 6.83567   1
  11  -1  -7 19.3419 7.06890   3
  11   1  -7 13.3803 5.37618   1
  11   1  -7 17.9142 6.84663   3
  10  -1  -7 5.22734 4.59691   1
  10  -1  -7 10.3570 5.98215   3
  10   1  -7 4.21060 4.21574   1
  10   1  -7 3.75344 4.60780   3
   9  -1  -7 39.7590 7.36661   1
   9  -1  -7 39.6296 8.14175   3
   9   1  -7 35.5711 6.44667   1
   9   1  -7 42.2213 7.99056   3
   8  -1  -7 328.783 17.3014   3
   8  -1  -7 301.551 14.2582   1
   8   1  -7 309.890 15.9947   3
   8   1  -7 352.121 13.9519   1
   7  -1  -7 80.1851 8.35259   1
   7  -1  -7 89.0659 10.7260   3
   7   1  -7 75.6474 9.55650   3
   7   1  -7 85.4576 7.73083   1
   6  -1  -7 9.97859 4.28198   1
   6  -1  -7 6.47330 5.07160   3
   6   1  -7 9.21072 3.09543   1
   6   1  -7 5.14433 4.46068   3
   6   1  -7 7.25757 3.08923   1
   5  -1  -7 176.343 12.0106   3
   5  -1  -7 182.468 9.12087   1
   5   1  -7 177.083 7.18518   1
   5   1  -7 177.766 11.8277   3
   5   1  -7 186.234 7.12614   1
   4  -1  -7 28.1410 6.29104   3
   4  -1  -7 23.0226 4.06068   1
  -4   1   7 25.7072 4.54075   4
   4   1  -7 26.8106 6.22127   3
   3  -1  -7 655.612 14.8531   1
   3  -1  -7 652.281 20.9152   3
   3  -1  -7 665.645 20.0559   2
   3  -1  -7 668.654 14.8906   1
  -3   1   7 648.460 15.8689   4
   3   1  -7 678.472 21.1659   3
   2  -1  -7 56.4990 4.34512   1
   2  -1  -7 46.1589 6.55139   2
   2  -1  -7 53.7908 4.45037   1
   2  -1  -7 56.9073 7.89953   3
   2   1  -7 45.0965 5.81169   2
   2   1  -7 54.9162 7.27226   3
  -2   1   7 50.1059 4.71268   4
  -2   1   7 50.2054 5.65725   1
   1  -1  -7 101.377 4.59286   1
   1  -1  -7 86.0470 8.68966   3
   1  -1  -7 109.096 8.09172   2
   1  -1  -7 107.921 4.65913   1
  -1   1   7 106.180 6.47638   1
   1   1  -7 100.459 8.24951   3
   1   1  -7 100.178 5.03293   4
   1   1  -7 102.782 7.10089   2
   0  -1  -7 -1.1083 3.04086   2
   0  -1  -7 8.53766 4.14764   3
   0   1  -7 0.02680 2.45826   2
   0   1   7 6.96266 2.63299   1
   0   1  -7 2.77788 1.64767   4
   0   1  -7 4.18137 3.57681   3
  -1  -1  -7 -2.7845 3.15672   3
  -1  -1  -7 2.07211 3.05226   2
  -1   1  -7 1.68122 3.26762   3
  -1   1  -7 -0.2240 2.58965   2
  -1   1  -7 -0.8025 1.43041   4
   1   1   7 3.13874 2.26495   1
  -2  -1  -7 239.498 11.6893   2
  -2  -1  -7 243.776 11.4495   3
   2   1   7 231.324 8.92683   1
  -2   1  -7 220.012 9.93882   2
  -2   1  -7 222.224 6.95970   4
  -3  -1  -7 315.661 13.6420   2
  -3  -1  -7 290.679 12.6174   3
  -3   1  -7 296.497 12.0109   2
  -3   1  -7 295.469 8.89474   4
   3   1   7 309.146 10.8592   1
  -4  -1  -7 117.858 9.32874   2
  -4   1  -7 123.073 8.35458   2
   4   1   7 128.675 7.81729   1
  -5  -1  -7 475.656 11.2191   1
  -5  -1  -7 488.163 18.8153   2
   5   1   7 462.084 15.1499   1
  -5   1  -7 443.002 16.4605   2
  -6  -1  -7 46.7185 4.55964   1
  -6  -1  -7 49.9688 4.83014   1
   6  -1   7 59.3872 6.62902   1
  -6  -1  -7 40.0699 7.41377   2
   6   1   7 49.2265 5.71538   4
  -6   1  -7 49.4070 7.41355   2
   6   1   7 50.5621 6.85881   1
  -7  -1  -7 20.5023 4.25196   1
  -7  -1  -7 13.0399 5.45906   2
  -7  -1  -7 12.8730 3.65298   1
   7   1   7 10.6590 4.83696   1
  -7   1  -7 23.6815 6.16525   2
  -8  -1  -7 21.0642 4.67033   1
  -8  -1  -7 8.85051 5.74911   2
  -8   1  -7 18.5173 6.50641   2
   8   1   7 8.98987 5.28926   1
  -9  -1  -7 56.7635 10.2001   2
  -9  -1  -7 55.2469 6.72229   1
   9   1   7 39.6330 7.72705   1
  -9   1  -7 45.3676 8.93760   2
 -10  -1  -7 5.06348 3.84568   1
 -10  -1  -7 1.42344 5.62353   2
 -10   1  -7 0.37875 5.50004   2
 -11  -1  -7 362.970 22.1493   2
 -11  -1  -7 403.140 15.2821   1
 -11   1  -7 367.286 21.2400   2
 -12  -1  -7 63.9159 12.3965   2
 -12  -1  -7 60.2707 7.98429   1
 -12   1  -7 66.4473 12.4217   2
 -13  -1  -7 28.9232 10.5156   2
 -13  -1  -7 36.9879 7.07095   1
 -13   1  -7 23.8307 9.10113   2
  13  -2  -7 84.8652 12.8325   1
  13  -2  -7 81.3345 12.8809   3
  13   2  -7 80.6903 10.6962   1
  12  -2  -7 133.243 14.2133   1
  12  -2  -7 126.906 15.1577   3
  12   2  -7 158.797 12.3547   1
  11  -2  -7 51.3679 10.3683   3
  11  -2  -7 43.4740 8.22885   1
  11   2  -7 63.1644 9.38915   3
  11   2  -7 46.7792 7.60110   1
  10  -2  -7 240.791 15.0226   1
  10   2  -7 211.201 13.3796   3
  10   2  -7 212.787 12.2313   1
   9  -2  -7 102.962 11.1396   1
   9   2  -7 56.9928 8.47304   3
   9   2  -7 82.7633 8.54490   1
   8  -2  -7 688.130 22.4305   1
   8   2  -7 710.184 23.3402   3
   8   2  -7 693.175 18.8790   1
   7  -2  -7 126.942 9.75561   1
   7   2  -7 112.781 7.31261   1
   7   2  -7 122.290 11.4512   3
   6  -2  -7 948.606 24.2460   1
   6   2  -7 954.526 18.4177   1
  -6   2   7 964.262 24.9210   4
   6   2  -7 934.929 26.4514   3
   6   2  -7 949.703 18.5052   1
   5  -2  -7 490.854 15.9510   1
   5   2  -7 499.829 18.5798   3
  -5   2   7 487.123 16.1702   4
   4  -2  -7 161.354 8.81841   1
  -4   2   7 149.681 9.01808   4
   4   2  -7 150.985 10.6196   3
   3  -2  -7 303.267 11.0319   1
   3  -2  -7 305.318 14.8875   3
   3  -2  -7 305.296 13.9327   2
  -3   2   7 318.544 11.7729   4
   3   2  -7 286.443 14.0388   3
   2  -2  -7 38.5261 6.10211   2
   2  -2  -7 35.8227 4.60309   1
   2  -2  -7 55.8235 8.25550   3
   2   2  -7 48.3826 7.36880   3
  -2   2   7 48.6591 6.27841   1
  -2   2   7 42.5824 5.24981   4
   1  -2  -7 40.5157 6.76555   3
   1  -2  -7 45.8529 4.80242   1
   1  -2  -7 38.6311 6.21266   2
  -1   2   7 38.9834 5.07011   1
   1   2  -7 47.8874 7.31038   3
   1   2  -7 38.4479 5.03584   2
  -1   2   7 41.0645 4.82201   4
   0  -2  -7 139.640 6.51543   1
   0  -2  -7 146.397 9.50310   2
   0  -2  -7 136.826 6.57357   1
   0  -2  -7 139.073 9.87092   3
   0   2   7 144.246 7.27380   4
   0   2   7 140.523 7.88074   1
   0   2  -7 147.264 7.51000   2
  -1  -2  -7 877.410 17.4387   1
  -1  -2  -7 837.686 16.9370   1
  -1  -2  -7 845.850 22.8825   2
  -1  -2  -7 841.666 22.7366   3
   1   2   7 846.446 18.4378   4
   1   2   7 864.327 19.9183   1
  -1   2  -7 828.163 18.7654   2
  -2  -2  -7 298.995 13.6723   2
  -2  -2  -7 318.605 13.2981   3
  -2  -2  -7 294.699 9.57210   1
  -2  -2  -7 315.640 9.56166   1
   2   2   7 294.302 11.3533   1
  -2   2  -7 309.442 10.8972   2
   2   2   7 311.524 10.6046   4
  -3  -2  -7 3.63429 3.70634   2
  -3  -2  -7 2.92801 3.27499   3
  -3  -2  -7 -0.3171 2.31948   1
  -3  -2  -7 4.08913 2.47488   1
  -3   2  -7 3.43409 1.75173   4
  -3   2  -7 -0.8535 2.61155   2
   3   2   7 4.32766 2.74496   4
   3   2   7 0.68626 2.98116   1
  -4  -2  -7 426.230 14.8591   3
  -4  -2  -7 412.936 12.2318   1
  -4  -2  -7 448.660 17.5891   2
  -4  -2  -7 399.642 11.8343   1
  -4   2  -7 427.530 11.1691   4
   4   2   7 409.469 13.2267   4
  -4   2  -7 398.956 13.8544   2
   4   2   7 399.114 14.2628   1
  -5  -2  -7 128.966 11.9888   2
  -5  -2  -7 137.862 7.66558   1
  -5  -2  -7 146.176 8.01921   1
  -5   2  -7 155.715 9.59995   2
   5   2   7 129.604 8.34559   4
   5   2   7 153.790 9.75649   1
  -5   2  -7 140.369 8.77322   4
  -6  -2  -7 249.233 10.8474   1
  -6  -2  -7 236.806 10.1429   1
  -6  -2  -7 238.860 14.5771   2
   6   2   7 232.275 12.2481   1
   6   2   7 235.564 11.2400   4
  -6   2  -7 244.734 12.4771   2
  -7  -2  -7 130.699 13.1254   2
  -7  -2  -7 148.785 9.37998   1
   7   2   7 164.036 11.2967   1
  -7   2  -7 163.273 11.5899   2
  -8  -2  -7 163.386 9.97608   1
  -8  -2  -7 150.973 14.7174   2
   8   2   7 162.571 11.9865   1
  -8   2  -7 162.609 14.0714   2
  -9  -2  -7 119.231 9.41072   1
  -9  -2  -7 115.437 13.7494   2
  -9   2  -7 116.716 12.2987   2
   9   2   7 135.006 13.7964   1
 -10  -2  -7 167.006 11.2229   1
 -10  -2  -7 145.247 15.8449   2
  10   2   7 149.200 14.0579   1
 -10   2  -7 180.722 16.6033   2
 -11  -2  -7 17.5857 8.00288   2
 -11  -2  -7 12.6724 5.37356   1
  11   2   7 14.3141 7.49498   1
 -11   2  -7 16.7819 7.61413   2
 -12  -2  -7 32.9305 6.71060   1
 -12  -2  -7 29.5434 9.84718   2
 -12   2  -7 32.5542 9.67305   2
 -13  -2  -7 33.2331 7.60544   1
 -13  -2  -7 41.3088 11.9629   2
 -13   2  -7 14.3256 8.69547   2
  13  -3  -7 24.2974 7.86444   1
  13   3  -7 31.2922 7.41311   1
  12  -3  -7 22.6491 7.79856   1
  12   3  -7 8.10450 4.99035   1
  11  -3  -7 20.3829 7.04024   1
  11   3  -7 35.1423 8.24023   3
  11   3  -7 22.9906 6.00568   1
  10  -3  -7 55.7023 9.93976   1
  10   3  -7 41.9599 6.72009   1
  10   3  -7 50.7877 8.43670   3
   9  -3  -7 5.76557 4.78800   1
   9   3  -7 0.52282 3.12773   1
   9   3  -7 5.62230 4.65080   3
   8  -3  -7 69.0955 9.79732   1
  -8   3   7 33.2949 7.36020   4
   8   3  -7 58.5877 8.76576   3
   8   3  -7 42.7617 5.72261   1
   7  -3  -7 191.989 12.2292   1
   7   3  -7 181.991 8.01847   1
  -7   3   7 207.564 12.8082   4
   7   3  -7 207.269 12.9964   3
   6  -3  -7 111.451 10.5933   1
  -6   3   7 93.6129 9.59548   4
   6   3  -7 101.204 10.8140   3
   5  -3  -7 50.4343 7.36741   1
  -5   3   7 53.7398 7.19435   4
   5   3  -7 45.4151 7.55784   3
   4  -3  -7 6.07634 4.30364   2
   4  -3  -7 5.07512 3.76294   1
  -4   3   7 1.92472 3.63468   4
   3  -3  -7 310.173 12.3952   1
   3  -3  -7 318.009 14.7606   2
  -3   3   7 310.007 12.7219   4
   2  -3  -7 380.117 13.0826   1
   2  -3  -7 396.863 15.9532   2
  -2   3   7 387.304 13.6301   4
  -2   3   7 414.451 14.7367   1
   1  -3  -7 357.823 12.5186   1
   1  -3  -7 406.397 16.0392   2
  -1   3   7 394.910 14.1174   1
  -1   3   7 397.716 13.4246   4
   0  -3  -7 51.4451 5.87692   1
   0  -3  -7 51.5426 7.04495   2
   0  -3  -7 64.0803 8.35979   3
   0   3   7 47.3215 6.10727   1
   0   3   7 59.0034 6.20203   4
   0   3  -7 62.9887 4.89052   2
  -1  -3  -7 778.464 18.9053   1
  -1  -3  -7 804.029 22.5291   3
  -1  -3  -7 861.847 23.8844   2
  -1   3  -7 833.697 17.1527   2
   1   3   7 818.266 20.7384   1
   1   3   7 792.152 19.6707   4
  -2  -3  -7 155.972 10.1739   3
  -2  -3  -7 164.703 8.63495   1
  -2  -3  -7 169.544 11.0852   2
   2   3   7 173.923 9.68616   1
  -2   3  -7 157.758 7.31135   2
   2   3   7 164.975 8.94411   4
  -3  -3  -7 8.01097 3.91330   3
  -3  -3  -7 3.76255 4.08079   2
  -3  -3  -7 2.68396 3.10158   1
  -3   3  -7 6.59164 2.94986   2
   3   3   7 7.91518 3.53274   4
  -3   3  -7 6.15871 1.76776   4
  -3   3  -7 7.17812 1.74812   4
   3   3   7 2.28309 3.29043   1
  -4  -3  -7 17.3139 4.49248   3
  -4  -3  -7 24.7647 6.42649   2
  -4  -3  -7 25.3563 4.83067   1
   4   3   7 25.7330 5.10503   4
  -4   3  -7 20.9943 2.97497   4
  -4   3  -7 29.7592 4.74664   2
  -4   3  -7 24.0228 3.36422   4
   4   3   7 24.4342 5.49892   1
  -5  -3  -7 467.020 15.5136   1
  -5  -3  -7 485.738 20.0650   2
  -5  -3  -7 469.972 15.0558   3
   5   3   7 452.101 15.9001   4
  -5   3  -7 507.991 15.7994   2
   5   3   7 474.547 17.3822   1
  -6  -3  -7 -0.2781 3.79911   1
  -6  -3  -7 -0.1216 4.28190   2
   6   3   7 0.46275 3.56009   1
  -6   3  -7 0.60242 3.27614   2
   6   3   7 -1.6323 3.39972   4
  -7  -3  -7 49.9739 7.15085   1
  -7  -3  -7 39.5885 8.58167   2
   7   3   7 45.6457 7.07847   4
  -7   3  -7 48.4700 7.56646   2
   7   3   7 37.7736 7.45329   1
  -8  -3  -7 243.981 13.1587   1
  -8  -3  -7 248.747 16.9611   2
   8   3   7 245.093 14.7207   1
  -8   3  -7 270.504 14.7041   2
  -9  -3  -7 -4.3043 3.38064   1
  -9  -3  -7 -3.1421 4.67216   2
   9   3   7 1.41751 5.28264   1
  -9   3  -7 1.54506 4.47742   2
 -10  -3  -7 155.224 11.7267   1
 -10  -3  -7 147.868 16.3178   2
  10   3   7 150.336 14.5912   1
 -10   3  -7 180.080 14.4243   2
 -11  -3  -7 -2.1799 4.34912   1
 -11  -3  -7 -1.9051 5.68072   2
  11   3   7 5.35930 6.04702   1
 -11   3  -7 -4.3921 5.12906   2
 -12  -3  -7 195.506 20.8153   2
 -12  -3  -7 210.029 14.1889   1
  12   3   7 148.315 15.8450   1
 -12   3  -7 205.987 18.7909   2
  12  -4  -7 2.08862 5.51957   1
  12   4  -7 -0.0131 4.22644   1
  11  -4  -7 19.2430 6.79839   1
  11   4  -7 27.5626 5.91559   1
  10  -4  -7 0.34324 5.36530   1
  10   4  -7 -0.7658 3.47350   1
 -10   4   7 5.40857 6.30519   4
   9  -4  -7 122.251 11.9574   1
   9   4  -7 145.484 8.67656   1
  -9   4   7 148.469 14.3514   4
   8  -4  -7 4.84214 4.75064   1
   8   4  -7 7.02458 3.16661   1
  -8   4   7 15.2224 5.75467   4
   7  -4  -7 77.0160 10.0902   1
  -7   4   7 69.2653 9.46822   4
   6  -4  -7 134.292 12.0920   1
  -6   4   7 127.280 11.6284   4
   5  -4  -7 191.875 11.6507   1
  -5   4   7 188.235 11.9253   4
   4  -4  -7 116.668 11.8425   2
   4  -4  -7 91.1665 8.60786   1
  -4   4   7 113.682 10.3607   4
   3  -4  -7 4.16462 4.11010   2
   3  -4  -7 1.25153 3.22187   1
  -3   4   7 2.20550 3.37095   4
   2  -4  -7 137.853 10.4563   2
   2  -4  -7 127.361 8.81670   1
  -2   4   7 147.753 9.44088   4
   1  -4  -7 255.171 13.4143   2
   1  -4  -7 207.367 10.6053   1
  -1   4   7 213.644 11.0506   4
  -1   4   7 221.363 11.4764   1
   0  -4  -7 84.2813 8.08538   1
   0  -4  -7 60.8829 8.03808   2
   0   4   7 67.8083 7.60505   1
   0   4   7 63.2816 7.24380   4
  -1  -4  -7 145.215 9.05170   1
  -1  -4  -7 149.619 10.7829   2
   1   4   7 147.145 9.62692   1
  -1   4  -7 130.292 5.58606   2
   1   4   7 142.318 9.32532   4
  -2  -4  -7 270.473 13.3744   3
  -2  -4  -7 284.955 12.2803   1
  -2  -4  -7 289.964 14.8490   2
  -2   4  -7 284.977 8.49610   2
   2   4   7 299.718 12.9654   4
   2   4   7 283.932 12.8973   1
  -3  -4  -7 1.65780 4.20456   2
  -3  -4  -7 9.86166 4.32389   3
  -3  -4  -7 4.03890 3.64649   1
   3   4   7 -2.2368 3.34220   4
  -3   4  -7 1.46781 2.24705   2
   3   4   7 1.74015 3.48990   1
  -4  -4  -7 171.303 12.7264   2
  -4  -4  -7 158.776 9.59857   3
  -4  -4  -7 165.097 10.3747   1
   4   4   7 157.584 10.9495   1
  -4   4  -7 160.512 7.71532   2
  -4   4  -7 149.410 6.33445   4
   4   4   7 152.787 10.1562   4
  -5  -4  -7 18.1400 5.22863   1
  -5  -4  -7 8.23292 5.46429   2
  -5  -4  -7 19.6414 4.88280   3
  -5   4  -7 26.0648 4.74665   2
  -5   4  -7 24.2863 3.89430   4
   5   4   7 22.5463 5.50554   4
   5   4   7 27.3423 5.86413   1
  -6  -4  -7 2.09852 3.37504   3
  -6  -4  -7 14.3731 6.50580   2
  -6  -4  -7 13.3303 5.14340   1
  -6   4  -7 8.43534 3.98459   2
   6   4   7 6.53848 5.03594   1
   6   4   7 9.27159 4.89160   4
  -6   4  -7 9.25803 3.64037   4
  -7  -4  -7 173.120 11.7338   1
  -7  -4  -7 156.501 14.9624   2
   7   4   7 150.603 11.3591   4
  -7   4  -7 153.720 10.3141   2
   7   4   7 162.392 14.0066   1
  -8  -4  -7 212.310 16.2375   2
  -8  -4  -7 207.643 13.0795   1
  -8   4  -7 179.858 11.9438   2
   8   4   7 210.204 14.3872   1
  -9  -4  -7 101.204 11.2234   1
  -9  -4  -7 105.442 14.0418   2
   9   4   7 114.801 13.2739   1
  -9   4  -7 113.828 11.8123   2
 -10  -4  -7 6.54666 4.87632   1
 -10  -4  -7 7.58414 6.59821   2
 -10   4  -7 12.4872 5.65249   2
  10   4   7 3.03113 5.08830   1
 -11  -4  -7 63.7771 11.7801   2
 -11  -4  -7 79.6974 10.6709   1
 -11   4  -7 77.4995 11.2270   2
  11   4   7 84.8869 13.2786   1
 -12  -4  -7 117.628 13.4350   1
 -12  -4  -7 114.485 16.5622   2
  12   4   7 105.472 13.7211   1
 -12   4  -7 144.071 15.9283   2
  12  -5  -7 31.5293 8.68874   1
  12   5  -7 42.4442 7.11254   1
  11  -5  -7 9.13370 6.08996   1
 -11   5   7 -5.2806 5.19423   4
  11   5  -7 -2.0947 3.44143   1
  10  -5  -7 78.6879 10.9173   1
  10   5  -7 73.3032 7.36855   1
 -10   5   7 83.3429 11.9868   4
   9  -5  -7 5.75469 4.86276   1
  -9   5   7 0.71858 4.79696   4
   8  -5  -7 210.769 14.2949   1
  -8   5   7 205.030 14.8055   4
   7  -5  -7 65.4707 10.1419   1
  -7   5   7 54.3555 9.26150   4
   6  -5  -7 1319.74 33.7764   1
  -6   5   7 1373.54 34.9051   4
   5  -5  -7 75.2665 9.00265   1
  -5   5   7 97.2258 10.7200   4
   4  -5  -7 0.80206 3.74938   1
   4  -5  -7 2.14052 4.44741   2
  -4   5   7 3.93316 4.15641   4
   3  -5  -7 307.191 14.2733   1
   3  -5  -7 279.349 15.3659   2
  -3   5   7 307.433 14.8506   4
   2  -5  -7 35.1778 6.37506   1
   2  -5  -7 25.4805 6.34005   2
  -2   5   7 35.5826 6.73793   4
   1  -5  -7 192.666 11.3051   1
   1  -5  -7 217.819 13.1385   2
  -1   5   7 186.832 11.6910   1
  -1   5   7 219.444 12.3253   4
   0  -5  -7 423.016 15.9841   1
   0  -5  -7 417.631 17.7398   2
   0   5   7 420.007 16.3070   4
   0   5   7 390.874 16.2555   1
  -1  -5  -7 288.650 15.3809   2
  -1  -5  -7 307.864 13.7028   1
   1   5   7 320.891 14.3287   4
   1   5   7 302.721 14.2752   1
  -2  -5  -7 37.1233 7.57549   2
  -2  -5  -7 24.5814 5.39329   1
   2   5   7 34.0416 6.71221   1
   2   5   7 40.8058 6.76388   4
  -3  -5  -7 29.4756 6.41564   1
  -3  -5  -7 32.8117 6.61996   3
  -3  -5  -7 29.2558 7.27523   2
   3   5   7 23.1210 5.43165   1
  -3   5  -7 29.3487 3.14781   2
  -3   5  -7 27.7322 2.87789   4
   3   5   7 27.3744 6.10953   4
  -4  -5  -7 184.766 13.4909   2
  -4  -5  -7 210.889 12.3773   1
  -4  -5  -7 185.648 10.9024   3
   4   5   7 200.486 12.7049   1
   4   5   7 201.122 12.3860   4
  -4   5  -7 208.430 7.63384   2
  -4   5  -7 194.487 7.44636   4
  -5  -5  -7 21.4595 6.88147   2
  -5  -5  -7 20.6697 5.98032   1
  -5  -5  -7 23.7278 5.05028   3
   5   5   7 15.7653 5.89343   1
  -5   5  -7 27.4576 4.25620   2
  -5   5  -7 20.2140 4.03436   4
   5   5   7 20.0580 5.79461   4
  -6  -5  -7 158.212 11.8895   1
  -6  -5  -7 179.013 9.07009   3
  -6  -5  -7 194.005 14.6970   2
  -6   5  -7 169.392 9.18911   2
   6   5   7 179.640 12.6227   4
   6   5   7 163.859 12.6900   1
  -6   5  -7 179.863 9.32630   4
  -7  -5  -7 11.8759 6.72324   2
  -7  -5  -7 8.77554 5.45566   1
   7   5   7 16.3732 6.38269   1
  -7   5  -7 12.1910 4.40033   2
   7   5   7 22.2207 6.39219   4
  -7   5  -7 18.3697 4.68940   4
  -8  -5  -7 6.86520 5.19406   1
  -8  -5  -7 0.05110 5.58268   2
   8   5   7 11.7186 5.51716   1
  -8   5  -7 14.8240 5.11873   2
  -9  -5  -7 143.049 16.5673   2
  -9  -5  -7 194.114 14.2334   1
  -9   5  -7 152.551 11.4603   2
   9   5   7 169.190 16.4064   1
 -10  -5  -7 106.586 15.6161   2
 -10  -5  -7 70.7450 10.9197   1
  10   5   7 74.8340 11.8554   1
 -10   5  -7 70.6205 9.99074   2
 -11  -5  -7 -4.2750 4.46575   1
 -11  -5  -7 -4.8873 6.26746   2
 -11   5  -7 -0.6796 5.38711   2
  11   5   7 12.2425 7.04430   1
 -12  -5  -7 25.7729 10.1448   2
 -12  -5  -7 8.09442 6.28694   1
  12   5   7 27.8842 9.73108   1
 -12   5  -7 10.4297 6.92298   2
  11  -6  -7 42.3169 9.38390   1
  11   6  -7 50.8754 10.5014   4
 -11   6   7 32.5596 9.06855   4
  10  -6  -7 -0.2015 4.97441   1
  10   6  -7 0.32411 5.30953   4
 -10   6   7 6.53806 6.10971   4
   9  -6  -7 120.245 14.8121   1
  -9   6   7 106.387 13.5034   4
   8  -6  -7 61.2273 10.2663   1
  -8   6   7 58.8360 9.98519   4
   7  -6  -7 1304.52 35.8666   1
  -7   6   7 1416.45 37.8927   4
   6  -6  -7 27.4161 6.45407   1
  -6   6   7 30.7001 7.37287   4
   5  -6  -7 210.806 13.5314   1
  -5   6   7 209.336 14.0286   4
   4  -6  -7 11.9405 5.54243   2
   4  -6  -7 25.8078 7.05048   1
  -4   6   7 5.38911 4.91662   4
   3  -6  -7 24.7798 6.76817   1
   3  -6  -7 25.8624 6.72467   2
  -3   6   7 28.7872 6.79048   4
   2  -6  -7 169.740 11.6593   1
   2  -6  -7 190.160 12.9293   2
  -2   6   7 204.058 12.6840   4
   1  -6  -7 247.835 13.4134   1
   1  -6  -7 239.044 14.3980   2
  -1   6   7 246.934 13.7511   1
  -1   6   7 256.324 14.0131   4
   0  -6  -7 -0.6325 3.84955   1
   0  -6  -7 0.57058 3.99954   2
   0   6   7 6.52109 4.59990   4
   0   6   7 2.30739 3.85815   1
   0   6  -7 0.94468 1.88666   4
  -1  -6  -7 138.786 10.8194   1
  -1  -6  -7 139.776 13.0704   2
   1   6   7 131.910 12.0406   4
   1   6   7 119.183 12.2201   1
  -2  -6  -7 117.593 11.6657   1
  -2  -6  -7 133.904 13.1858   2
   2   6   7 125.518 11.3575   1
  -2   6  -7 121.095 5.09455   4
   2   6   7 111.816 11.0155   4
  -3  -6  -7 2.37631 5.07377   2
  -3  -6  -7 2.68591 4.48118   1
  -3   6  -7 -1.5186 1.98908   4
   3   6   7 -2.2008 3.45658   1
   3   6   7 0.36379 4.93549   4
  -4  -6  -7 705.260 23.2363   1
  -4  -6  -7 627.577 20.4643   3
  -4  -6  -7 711.122 25.9603   2
  -4   6  -7 687.903 15.6280   4
   4   6   7 679.876 23.1712   4
   4   6   7 657.419 23.1600   1
  -5  -6  -7 59.9227 7.50256   3
  -5  -6  -7 50.3487 8.59587   1
  -5  -6  -7 47.2184 8.92401   2
   5   6   7 50.0675 8.81494   1
   5   6   7 58.2882 9.04725   4
  -5   6  -7 54.9448 6.01038   4
  -6  -6  -7 4.05036 5.28701   2
  -6  -6  -7 3.00552 5.34258   1
  -6  -6  -7 3.78782 3.55929   3
   6   6   7 6.86910 5.32920   4
   6   6   7 11.7159 5.59638   1
  -6   6  -7 4.72799 3.63200   4
  -7  -6  -7 326.961 19.8392   2
  -7  -6  -7 322.894 17.3900   1
  -7   6  -7 320.811 13.7855   4
   7   6   7 340.703 18.4942   1
   7   6   7 355.594 18.1777   4
  -8  -6  -7 49.9921 10.9781   2
  -8  -6  -7 59.2237 10.4969   1
  -8   6  -7 52.3609 7.42996   4
   8   6   7 36.0075 8.61935   1
   8   6   7 37.7064 14.4228   4
  -9  -6  -7 409.216 23.9730   2
  -9  -6  -7 422.464 20.8033   1
   9   6   7 404.590 21.7074   1
  -9   6  -7 429.659 18.3432   4
 -10  -6  -7 24.9145 9.47478   2
 -10  -6  -7 16.6283 6.97970   1
  10   6   7 23.1618 8.48520   1
 -11  -6  -7 112.162 13.6768   1
 -11  -6  -7 95.0216 15.6041   2
  11   6   7 133.898 17.2545   1
  11  -7  -7 41.2990 9.88341   1
 -11   7   7 23.8247 8.62925   4
  11   7  -7 46.5668 10.4554   4
  10  -7  -7 10.4144 6.80256   1
 -10   7   7 39.2920 9.62395   4
  10   7  -7 42.6879 8.85297   4
   9  -7  -7 -0.4220 5.56041   1
   9   7  -7 0.84512 5.13144   4
  -9   7   7 0.64046 5.89787   4
   8  -7  -7 85.6122 12.9204   1
   8   7  -7 60.3345 9.54796   4
  -8   7   7 78.5772 11.9400   4
   7  -7  -7 24.5969 7.18144   1
   7   7  -7 21.9287 6.25938   4
  -7   7   7 21.2225 7.62120   4
   6  -7  -7 23.2093 6.77610   1
  -6   7   7 27.1804 7.70385   4
   6   7  -7 35.3027 6.83890   4
   5  -7  -7 201.388 14.1150   1
  -5   7   7 235.333 15.4763   4
   5   7  -7 223.101 12.2880   4
   4  -7  -7 51.7967 9.23351   2
   4  -7  -7 75.4585 9.84028   1
   4   7  -7 74.9866 7.87645   4
  -4   7   7 72.5637 10.2783   4
   3  -7  -7 123.123 12.7410   1
   3  -7  -7 131.270 13.5769   2
  -3   7   7 151.340 13.2246   4
   3   7  -7 121.788 8.15961   4
   2  -7  -7 7.68028 5.29876   2
   2  -7  -7 8.62204 5.09014   1
   2   7  -7 12.1973 3.79174   4
  -2   7   7 23.0711 6.96477   4
   1  -7  -7 1372.71 34.3400   1
   1  -7  -7 1376.12 36.2008   2
   1   7  -7 1328.27 24.6210   4
  -1   7   7 1297.70 34.1162   4
   0  -7  -7 37.8126 7.92347   2
   0  -7  -7 39.2500 7.52806   1
   0   7   7 33.4836 7.54488   1
   0   7   7 37.6676 7.74011   4
   0   7  -7 43.1320 4.61061   4
  -1  -7  -7 540.048 20.8521   1
  -1  -7  -7 524.970 21.7208   2
  -1   7  -7 544.451 12.8543   4
   1   7   7 516.729 21.0326   4
   1   7   7 523.423 20.8028   1
  -2  -7  -7 -0.5244 4.46401   2
  -2  -7  -7 -2.4643 4.00900   1
   2   7   7 1.00754 4.34434   4
  -2   7  -7 -0.2058 2.46211   4
   2   7   7 1.56667 4.35209   1
  -3  -7  -7 289.503 17.2493   2
  -3  -7  -7 305.485 16.2775   1
   3   7   7 336.010 17.4341   4
   3   7   7 325.888 16.7912   1
  -3   7  -7 318.800 10.4150   4
  -4  -7  -7 6.06467 5.10001   1
  -4  -7  -7 0.99343 5.22260   2
  -4   7  -7 6.61986 3.10201   4
   4   7   7 8.54293 5.43486   4
   4   7   7 -2.6060 4.61486   1
  -5  -7  -7 112.640 13.8532   2
  -5  -7  -7 97.4940 12.4258   1
  -5  -7  -7 101.019 9.68191   3
  -5   7  -7 91.3048 8.00347   4
   5   7   7 72.9116 10.4246   4
   5   7   7 89.0176 10.5409   1
  -6  -7  -7 11.9320 7.28772   2
  -6  -7  -7 31.5423 7.65016   1
   6   7   7 26.7625 7.48847   4
   6   7   7 21.0643 6.63326   1
  -6   7  -7 38.8844 5.97290   4
  -7  -7  -7 4.24187 5.17076   1
  -7  -7  -7 3.89920 6.11516   2
   7   7   7 4.72902 6.04929   4
  -7   7  -7 5.42571 4.06229   4
   7   7   7 2.64861 5.39189   1
  -8  -7  -7 26.3070 8.71143   2
  -8  -7  -7 28.8136 8.70376   1
   8   7   7 34.2122 11.4266   4
  -8   7  -7 29.8728 6.39588   4
   8   7   7 30.8754 8.43478   1
  -9  -7  -7 29.6695 9.45508   2
  -9  -7  -7 31.5853 8.95318   1
   9   7   7 32.8309 8.75634   1
  -9   7  -7 32.0543 6.68371   4
 -10  -7  -7 49.9142 10.6666   1
 -10  -7  -7 33.7567 10.4252   2
  10   7   7 35.5994 9.74446   1
 -10   7  -7 59.6933 9.69093   4
  10  -8  -7 9.61340 7.06353   1
 -10  -8   7 -7.6103 5.42880   2
  10   8  -7 13.5463 6.62243   4
 -10   8   7 3.68164 6.60225   4
  -9  -8   7 156.484 15.3667   2
   9  -8  -7 136.059 15.2163   1
  -9   8   7 151.839 17.4185   4
   9   8  -7 151.397 15.0728   4
  -8  -8   7 1.69250 5.18694   2
   8  -8  -7 6.11521 5.86322   1
  -8   8   7 0.17137 5.99154   4
   8   8  -7 3.73609 4.71653   4
   7  -8  -7 1.44063 5.30439   1
  -7  -8   7 3.46673 5.23155   2
   7   8  -7 4.05331 5.23253   4
  -7   8   7 4.34925 5.87755   4
   6  -8  -7 63.3194 10.7604   1
  -6   8   7 58.9436 10.3401   4
   6   8  -7 56.2099 8.67813   4
   5  -8  -7 9.05456 5.73110   1
  -5   8   7 11.4774 6.58675   4
   5   8  -7 9.79040 4.68768   4
   4  -8  -7 10.2908 5.88575   1
   4  -8  -7 5.50529 5.46561   2
  -4   8   7 10.1216 6.13958   4
   4   8  -7 7.78145 4.71928   4
   3  -8  -7 8.44360 5.81610   1
   3  -8  -7 9.92261 5.85253   2
   3   8  -7 4.19315 3.88898   4
  -3   8   7 22.1630 7.20690   4
   2  -8  -7 50.7184 8.77069   1
   2  -8  -7 60.3846 9.51291   2
   2   8  -7 53.3675 6.45047   4
  -2   8   7 43.3655 8.47747   4
   1  -8  -7 141.113 13.9876   2
   1  -8  -7 137.452 13.0269   1
  -1   8   7 129.985 13.1392   4
   1   8  -7 142.976 8.39899   4
   0  -8  -7 24.7155 6.75933   1
   0  -8  -7 25.7594 7.39639   2
   0   8  -7 34.6927 4.93462   4
   0   8   7 30.7413 7.67316   4
  -1  -8  -7 25.4410 6.75300   1
  -1  -8  -7 18.0653 6.69329   2
   1   8   7 5.80488 5.62395   4
   1   8   7 9.57465 5.23981   1
  -1   8  -7 18.4484 3.88331   4
  -2  -8  -7 8.26361 5.61628   1
  -2  -8  -7 17.6913 6.89170   2
   2   8   7 7.31878 5.48818   1
  -2   8  -7 5.30941 3.07821   4
   2   8   7 6.55905 5.61352   4
  -3  -8  -7 58.0625 10.4497   2
  -3  -8  -7 49.3882 8.63295   1
  -3   8  -7 52.2887 6.10952   4
   3   8   7 47.4231 9.28514   4
   3   8   7 56.8905 9.18877   1
  -4  -8  -7 22.6721 7.92172   2
  -4  -8  -7 24.6452 6.83390   1
   4   8   7 10.9541 5.83951   1
   4   8   7 28.1845 7.97237   4
  -4   8  -7 27.6917 4.99055   4
  -5  -8  -7 52.5811 9.46151   1
  -5  -8  -7 56.2323 10.6441   2
   5   8   7 57.1453 10.0302   4
   5   8   7 45.7593 8.79416   1
  -5   8  -7 53.2895 6.57132   4
  -6  -8  -7 19.8922 7.81750   2
  -6  -8  -7 8.33031 6.30227   1
   6   8   7 19.2775 7.38079   1
   6   8   7 28.9504 8.71646   4
  -6   8  -7 16.1541 4.80606   4
  -7  -8  -7 72.1620 11.7726   1
  -7  -8  -7 83.1946 13.0958   2
   7   8   7 80.8447 12.2492   1
   7   8   7 80.9795 11.8416   4
  -7   8  -7 88.8976 9.52517   4
  -8  -8  -7 41.7146 9.22600   1
  -8  -8  -7 45.2784 10.7154   2
   8   8   7 49.4619 14.2231   4
   8   8   7 33.6463 9.59195   1
  -8   8  -7 47.4036 7.99258   4
  -9  -8  -7 24.8978 9.63198   2
  -9  -8  -7 31.5091 9.86851   1
  -9   8  -7 28.8105 7.18666   4
   9   8   7 46.1295 10.5154   1
   9  -9  -7 6.85853 7.19815   1
  -9   9   7 -2.0351 5.99133   4
   9   9  -7 0.56595 5.90790   4
   8  -9  -7 58.4679 11.1761   1
  -8   9   7 53.7564 11.7667   4
   8   9  -7 37.3650 8.36405   4
   7  -9  -7 6.33959 6.14816   1
   7   9  -7 -0.6537 4.30501   4
  -7   9   7 3.60619 5.95019   4
   6  -9  -7 29.0157 8.39355   1
  -6   9   7 48.2449 10.1092   4
   6   9  -7 34.9443 7.35299   4
   5  -9  -7 -3.3434 4.84125   1
   5   9  -7 -1.6309 4.10064   4
  -5   9   7 -2.7420 5.28941   4
   4  -9  -7 51.7927 9.96338   2
   4  -9  -7 55.6320 9.54408   1
  -4   9   7 40.9640 9.38917   4
   4   9  -7 49.1264 7.87804   4
   3  -9  -7 20.5923 6.75454   2
   3  -9  -7 16.3405 6.42986   1
  -3   9   7 12.0730 6.36699   4
   3   9  -7 19.6667 5.33886   4
   2  -9  -7 523.507 22.6799   1
   2  -9  -7 506.653 22.5104   2
   2   9  -7 443.846 16.3142   4
  -2   9   7 476.884 22.6076   4
   1  -9  -7 258.350 16.5896   2
   1  -9  -7 222.965 15.6339   1
  -1   9   7 221.520 16.2975   4
   1   9  -7 203.870 10.9602   4
   0  -9  -7 197.041 14.8128   1
   0  -9  -7 204.812 15.1598   2
   0   9   7 167.794 15.5692   4
   0   9  -7 189.281 10.1339   4
  -1  -9  -7 9.96260 5.56891   1
  -1  -9  -7 5.50216 5.34664   2
  -1   9  -7 1.89517 3.31070   4
   1   9   7 3.83855 5.88060   4
   1   9   7 1.41170 4.72565   1
  -2  -9  -7 28.1062 7.83042   1
  -2  -9  -7 33.3464 8.68060   2
   2   9   7 32.6535 7.80445   1
  -2   9  -7 38.5069 5.94164   4
   2   9   7 23.4297 7.88679   4
  -3  -9  -7 299.942 18.1254   1
  -3  -9  -7 331.323 19.6087   2
   3   9   7 346.007 19.4626   4
  -3   9  -7 312.816 12.9770   4
   3   9   7 304.516 18.1447   1
  -4  -9  -7 122.366 14.8813   2
  -4  -9  -7 100.756 12.4456   1
   4   9   7 132.352 14.7286   4
  -4   9  -7 105.751 9.07365   4
   4   9   7 92.8579 12.5429   1
  -5  -9  -7 15.5822 7.57211   1
  -5  -9  -7 6.53022 6.80718   2
   5   9   7 12.7182 7.18877   4
   5   9   7 7.80853 5.91796   1
  -5   9  -7 7.04757 4.51094   4
  -6  -9  -7 42.9805 10.7236   2
  -6  -9  -7 45.5095 10.0834   1
   6   9   7 51.0529 10.6336   4
   6   9   7 42.6346 9.18193   1
  -6   9  -7 45.1294 7.23220   4
  -7  -9  -7 70.3508 12.5676   1
  -7  -9  -7 65.8678 12.1383   2
   7   9   7 70.4490 12.2679   4
  -7   9  -7 55.5902 8.03563   4
   7   9   7 81.0225 13.1955   1
  -8  -9  -7 9.65644 7.19115   1
  -8  -9  -7 3.57462 6.91548   2
   8   9   7 13.2379 6.70274   1
  -8   9  -7 -0.9174 4.77054   4
   7 -10  -7 25.5854 8.62187   1
  -7  10   7 1.84451 6.56010   4
   7  10  -7 9.31933 6.27648   4
   6 -10  -7 1.48142 6.08095   1
   6  10  -7 -0.5694 4.79558   4
  -6  10   7 -2.9616 5.95037   4
   5 -10  -7 32.0217 8.74405   1
  -5  10   7 27.4798 8.46992   4
   5  10  -7 31.8937 7.49133   4
   4 -10  -7 33.9597 8.76055   1
   4 -10  -7 37.6580 8.77627   2
  -4  10   7 45.5085 10.1042   4
   4  10  -7 45.7968 7.97371   4
   3 -10  -7 8.11413 5.92764   1
   3 -10  -7 9.82312 6.27489   2
  -3  10   7 4.21805 6.32441   4
   3  10  -7 6.78960 4.84952   4
   2 -10  -7 1.94031 5.52198   2
   2 -10  -7 -4.3896 4.44991   1
   2  10  -7 -1.2669 4.02574   4
  -2  10   7 1.16253 5.97324   4
   1 -10  -7 201.272 15.9259   1
   1 -10  -7 207.565 15.6326   2
  -1  10   7 174.862 17.5668   4
   1  10  -7 167.180 11.0001   4
   0 -10  -7 221.287 16.3803   1
   0 -10  -7 161.593 16.0064   2
   0  10   7 197.369 18.2395   4
   0  10  -7 194.023 11.5114   4
  -1 -10  -7 12.2701 6.26213   1
  -1 -10  -7 2.15659 5.24484   2
   1  10   7 2.94420 6.56211   4
  -1  10  -7 3.13291 3.77742   4
  -2 -10  -7 119.180 14.2290   1
  -2 -10  -7 138.445 15.2192   2
  -2  10  -7 127.073 10.8167   4
   2  10   7 107.245 13.2557   1
   2  10   7 124.762 14.5681   4
  -3 -10  -7 18.0528 7.19339   1
  -3 -10  -7 17.2221 7.05721   2
   3  10   7 21.4218 7.23482   1
   3  10   7 20.1274 8.30665   4
  -3  10  -7 27.0451 5.74557   4
  -4 -10  -7 24.1873 8.42069   1
  -4 -10  -7 39.4624 9.80635   2
   4  10   7 29.1577 8.29401   1
  -4  10  -7 33.6271 6.52980   4
   4  10   7 20.8668 8.72549   4
  -5 -10  -7 10.5557 7.04164   2
  -5 -10  -7 6.76505 5.86218   1
  -5  10  -7 7.80140 4.60594   4
   5  10   7 1.80650 5.58479   1
   5  10   7 8.84382 7.32668   4
  -6 -10  -7 94.9755 14.1042   1
  -6 -10  -7 91.6179 14.2187   2
   6  10   7 112.486 14.8805   4
  -6  10  -7 124.602 11.9245   4
   6  10   7 102.792 13.3186   1
  -7 -10  -7 8.02491 7.02945   1
  -7 -10  -7 3.42011 6.60702   2
  -7  10  -7 8.42821 5.01289   4
   7  10   7 3.95060 5.65308   1
   7  10   7 11.9616 8.44767   4
   5 -11  -7 2.57364 6.25051   1
   5  11  -7 1.36424 5.24662   4
  -5  11   7 10.3398 7.47456   4
   4 -11  -7 20.0444 8.66604   1
   4  11  -7 23.4254 6.93808   4
  -4  11   7 17.8930 8.59813   4
   3 -11  -7 41.7628 9.61889   1
   3 -11  -7 28.1724 8.26917   2
   3  11  -7 36.8748 7.52239   4
  -3  11   7 31.1778 8.91089   4
   2 -11  -7 40.1158 9.31408   1
   2 -11  -7 25.2176 8.27354   2
  -2  11   7 33.9847 9.71853   4
   2  11  -7 39.5311 7.47361   4
   1 -11  -7 20.1277 7.47429   1
   1 -11  -7 24.5149 8.03820   2
   1  11  -7 17.9452 5.73273   4
  -1  11   7 22.6842 8.75746   4
   0 -11  -7 265.138 18.7079   1
   0 -11  -7 267.561 18.2505   2
   0  11   7 282.184 20.2117   4
   0  11  -7 249.860 14.0263   4
  -1 -11  -7 50.2520 10.9991   1
  -1 -11  -7 37.5598 9.37032   2
   1  11   7 50.2770 11.3974   4
  -1  11  -7 42.7923 7.45467   4
  -2 -11  -7 284.764 19.5415   1
  -2 -11  -7 232.683 17.9319   2
   2  11   7 243.091 18.8142   4
  -2  11  -7 270.281 14.3175   4
  -3 -11  -7 38.7775 9.71172   2
  -3 -11  -7 28.6412 9.53389   1
  -3  11  -7 44.2055 7.56268   4
   3  11   7 51.5753 9.74890   1
   3  11   7 25.4296 9.13468   4
  -4 -11  -7 9.04631 7.01336   2
  -4 -11  -7 9.25507 6.37384   1
   4  11   7 -5.7165 5.75534   4
  -4  11  -7 4.81965 4.50282   4
   4  11   7 3.33042 5.96479   1
  -5  11  -7 64.1193 9.11106   4
   5  11   7 74.8054 13.6353   4
  13   0  -8 0.91765 4.83643   1
  13   0  -8 -3.5411 5.97978   3
  12   0  -8 164.049 12.9993   1
  12   0  -8 178.947 14.9981   3
  11   0  -8 -4.4723 3.99708   1
  11   0  -8 -1.5352 4.73092   3
  10   0  -8 91.2673 12.1856   3
  10   0  -8 81.6026 9.74493   1
   9   0  -8 -2.4434 3.26872   1
   9   0  -8 -7.8105 4.15611   3
   8   0  -8 762.974 21.4444   1
   8   0  -8 748.914 26.3450   3
   7   0  -8 -0.9756 3.15598   1
   7   0  -8 6.68228 5.10849   3
   6   0  -8 92.7044 6.88447   1
   6   0  -8 109.760 12.2243   3
   6   0  -8 84.7360 6.69672   1
   5   0  -8 2.75338 2.57502   1
   5   0  -8 -1.4835 2.10241   1
   5   0  -8 4.19900 4.62887   3
   4   0  -8 639.194 22.1977   3
   3   0  -8 -0.6204 3.91485   3
   3   0  -8 0.82053 3.33408   2
   2   0  -8 21.6695 5.07074   2
   2   0  -8 13.5130 5.16863   3
  -2   0   8 21.7888 3.86122   1
   1   0  -8 -7.0937 3.08905   3
   1   0  -8 1.34909 3.20839   2
   0   0  -8 2031.62 41.1463   3
   0   0  -8 2017.68 38.1637   2
  -1   0  -8 -1.8900 3.43148   3
  -1   0  -8 6.17840 3.39286   2
  -2   0  -8 387.274 16.0946   3
  -2   0  -8 417.591 15.3159   2
  -3   0  -8 -0.3079 3.34055   2
  -4   0  -8 41.3393 6.86561   2
  -5   0  -8 0.17692 3.83950   2
   5   0   8 0.73168 2.92806   1
  -6   0  -8 381.132 17.5018   2
   6   0   8 352.996 16.4274   1
  -7   0  -8 1.34408 4.80868   2
  -8   0  -8 94.9822 11.6805   2
  -9   0  -8 1.53166 4.93986   2
 -10   0  -8 44.4227 9.78094   2
 -11   0  -8 3.26553 5.91746   2
 -12   0  -8 7.83110 6.85822   2
  13  -1  -8 54.5771 10.6497   3
  13  -1  -8 44.3345 9.58428   1
  13   1  -8 32.1387 7.86446   1
  12  -1  -8 15.3800 6.57407   1
  12  -1  -8 27.9303 8.72327   3
  12   1  -8 15.5570 6.89371   3
  12   1  -8 16.5300 6.47591   1
  11  -1  -8 47.6089 8.58039   1
  11  -1  -8 49.8946 9.97245   3
  11   1  -8 48.1453 8.15594   1
  11   1  -8 56.7148 10.0805   3
  10  -1  -8 -4.3861 4.61747   3
  10  -1  -8 -1.8443 3.78013   1
  10   1  -8 3.76669 4.48094   1
  10   1  -8 -3.1005 4.45795   3
   9  -1  -8 42.9417 8.79378   3
   9  -1  -8 44.1332 7.58823   1
   9   1  -8 48.4870 9.03061   3
   9   1  -8 35.9321 6.34077   1
   8  -1  -8 507.374 18.1551   1
   8  -1  -8 525.865 22.3510   3
   8   1  -8 522.417 21.6430   3
   8   1  -8 550.631 16.8015   1
   7  -1  -8 41.9453 8.50751   3
   7  -1  -8 33.5892 5.95407   1
   7   1  -8 31.3644 7.70896   3
   7   1  -8 32.2713 5.09355   1
   6  -1  -8 570.956 17.1638   1
   6  -1  -8 556.647 21.9914   3
   6   1  -8 571.013 13.8358   1
   6   1  -8 565.634 13.9524   1
   6   1  -8 587.463 21.9415   3
   5  -1  -8 135.819 8.11850   1
   5  -1  -8 137.170 11.4776   3
   5   1  -8 138.739 11.5794   3
   4  -1  -8 21.1505 3.87872   1
   4  -1  -8 20.3334 4.00779   1
   4  -1  -8 13.4241 5.92618   3
   4   1  -8 19.5197 6.41309   3
   3  -1  -8 2.60775 3.35706   2
   3  -1  -8 0.97265 2.24723   1
   3  -1  -8 -1.6288 1.82677   1
   3  -1  -8 2.51461 4.40333   3
  -3   1   8 -1.2058 2.43583   4
   3   1  -8 0.66189 3.54067   3
   2  -1  -8 408.071 15.9137   2
   2  -1  -8 393.224 17.0600   3
   2  -1  -8 412.773 9.62629   1
  -2   1   8 407.598 13.2777   1
   2   1  -8 390.244 16.8465   3
   2   1  -8 388.397 14.3234   2
   1  -1  -8 57.6215 7.19863   2
   1  -1  -8 44.8458 7.78207   3
   1   1  -8 45.4176 6.06310   2
   1   1  -8 62.9719 4.53911   4
  -1   1   8 60.2884 6.06856   1
   1   1  -8 56.1777 8.05626   3
   0  -1  -8 2157.56 43.2169   3
   0  -1  -8 2164.30 41.3661   2
   0   1  -8 2184.35 32.3094   4
   0   1   8 2173.54 35.8427   1
   0   1  -8 2206.45 44.1078   3
   0   1  -8 2197.07 38.9629   2
  -1  -1  -8 1959.14 40.5051   3
  -1  -1  -8 1972.81 39.3887   2
   1   1   8 2082.28 34.1417   1
  -1   1  -8 2027.66 36.7818   2
  -1   1  -8 2018.97 41.2957   3
  -1   1  -8 2021.41 30.1015   4
  -2  -1  -8 153.934 10.1964   2
  -2  -1  -8 166.670 10.7225   3
   2   1   8 141.585 7.81938   1
  -2   1  -8 146.084 9.00694   2
  -2   1  -8 152.100 6.35097   4
  -3  -1  -8 0.46785 3.61095   3
  -3  -1  -8 -2.8811 3.32421   2
   3   1   8 2.54671 2.55901   1
  -3   1  -8 2.27794 3.47126   2
  -3   1  -8 3.30178 2.23861   4
  -4  -1  -8 419.978 17.1797   2
  -4   1  -8 404.704 15.5077   2
   4   1   8 403.834 13.8710   1
  -4   1  -8 401.000 12.9698   4
  -5  -1  -8 -0.3196 3.75544   2
   5   1   8 5.74914 3.45292   1
  -5   1  -8 2.57853 3.88070   2
  -6  -1  -8 -1.8959 4.34325   2
  -6   1  -8 -3.9590 3.70204   2
   6   1   8 -5.3147 2.55527   1
  -7  -1  -8 -4.0013 4.09185   2
   7   1   8 2.01114 3.83547   1
  -7   1  -8 0.88785 4.22701   2
  -8  -1  -8 19.0232 6.45857   2
  -8   1  -8 11.0228 5.82013   2
  -9  -1  -8 17.0980 7.20361   2
  -9   1  -8 31.9888 8.19878   2
 -10  -1  -8 75.8411 12.4621   2
 -10   1  -8 78.0525 11.9248   2
 -11  -1  -8 -0.0983 3.42053   1
 -11  -1  -8 5.21560 6.60317   2
 -11   1  -8 0.84558 5.42223   2
 -12  -1  -8 164.896 19.1203   2
 -12   1  -8 147.053 17.2761   2
  13  -2  -8 211.761 16.5837   1
  13  -2  -8 206.452 19.5775   3
  13   2  -8 222.165 14.5360   1
  12  -2  -8 46.8075 8.99596   1
  12  -2  -8 55.0528 10.8769   3
  12   2  -8 61.4023 9.11664   1
  11  -2  -8 9.47193 5.41590   1
  11  -2  -8 6.44960 6.85976   3
  11   2  -8 9.90095 4.66045   1
  11   2  -8 20.1496 6.81439   3
  10  -2  -8 58.9067 8.99723   1
  10  -2  -8 38.7583 9.79877   3
  10   2  -8 62.4230 7.94933   1
  10   2  -8 49.2036 9.13272   3
   9  -2  -8 186.310 12.7180   1
   9  -2  -8 195.450 15.7429   3
   9   2  -8 205.479 10.6715   1
   9   2  -8 206.553 13.9862   3
   8  -2  -8 -0.3288 5.09152   3
   8  -2  -8 1.49471 3.63449   1
   8   2  -8 3.47396 4.39733   3
   8   2  -8 1.89632 3.02275   1
   7  -2  -8 83.7921 8.83604   1
   7  -2  -8 79.9219 11.2175   3
   7   2  -8 83.3102 5.69893   1
   7   2  -8 90.1743 6.07277   1
   7   2  -8 71.6856 9.91576   3
   6  -2  -8 268.102 16.4302   3
   6  -2  -8 260.754 12.3581   1
  -6   2   8 233.606 12.8348   4
   6   2  -8 233.281 14.3804   3
   5  -2  -8 11.2482 6.17309   3
   5  -2  -8 3.91252 3.43158   1
   5   2  -8 2.96508 4.55149   3
  -5   2   8 15.0633 4.42881   4
   4  -2  -8 105.453 7.68922   1
   4  -2  -8 106.538 11.2324   2
   4  -2  -8 115.513 12.1690   3
   4   2  -8 92.7134 10.3004   3
  -4   2   8 106.423 8.64499   4
   3  -2  -8 330.736 11.5600   1
   3  -2  -8 346.315 16.6339   3
   3  -2  -8 332.663 15.3762   2
   3   2  -8 311.398 15.5915   3
  -3   2   8 318.542 12.1460   4
   2  -2  -8 202.088 12.3858   3
   2  -2  -8 182.490 8.09620   1
   2  -2  -8 193.055 11.5474   2
   2  -2  -8 182.778 8.23138   1
  -2   2   8 186.731 9.05829   4
   2   2  -8 188.139 12.3694   3
  -2   2   8 193.379 10.1797   1
   2   2  -8 186.550 7.16754   4
   1  -2  -8 -0.3056 3.17834   2
   1  -2  -8 0.54177 2.21221   1
   1  -2  -8 0.06218 1.95902   1
   1  -2  -8 0.02291 3.98423   3
   1   2  -8 0.55707 2.74654   2
   1   2  -8 0.63283 1.66611   4
  -1   2   8 0.48521 2.43823   4
  -1   2   8 1.98475 2.75474   1
   1   2  -8 1.77515 3.95506   3
   0  -2  -8 687.879 15.0260   1
   0  -2  -8 669.489 21.3881   2
   0  -2  -8 704.045 14.8886   1
   0  -2  -8 700.597 22.2939   3
   0   2   8 687.313 16.3911   4
   0   2  -8 693.325 12.1206   4
   0   2   8 692.408 18.3583   1
   0   2  -8 701.514 17.8404   2
  -1  -2  -8 1317.72 22.4174   1
  -1  -2  -8 1314.38 22.3186   1
  -1  -2  -8 1335.31 31.2318   3
  -1  -2  -8 1314.49 31.3121   2
   1   2   8 1283.84 26.7343   1
   1   2   8 1269.01 24.4340   4
  -1   2  -8 1303.67 18.8371   4
  -1   2  -8 1293.07 26.3448   2
  -2  -2  -8 2062.96 41.1021   3
  -2  -2  -8 2024.36 41.9247   2
  -2  -2  -8 2162.94 32.1381   1
  -2  -2  -8 2084.94 31.5729   1
  -2   2  -8 2087.03 36.7906   2
   2   2   8 2089.03 37.2956   1
   2   2   8 2065.93 34.5544   4
  -2   2  -8 2081.78 29.1078   4
  -3  -2  -8 1.03186 2.29598   1
  -3  -2  -8 -0.1520 2.34815   1
  -3  -2  -8 4.61450 4.20860   2
  -3   2  -8 5.03966 3.26653   2
   3   2   8 3.10586 2.98357   4
  -3   2  -8 -0.0463 1.78232   4
   3   2   8 -2.0762 2.76701   1
  -4  -2  -8 134.496 6.94091   1
  -4  -2  -8 127.163 9.59667   3
  -4  -2  -8 129.120 11.8876   2
  -4  -2  -8 129.442 6.55259   1
  -4   2  -8 129.936 8.85648   2
   4   2   8 130.241 8.96970   1
  -4   2  -8 145.147 6.85926   4
   4   2   8 149.656 8.18997   4
  -5  -2  -8 2.34888 4.57260   2
  -5  -2  -8 1.81370 2.95359   1
  -5  -2  -8 2.10490 2.72461   1
   5   2   8 7.81393 4.31057   4
  -5   2  -8 -0.3619 3.22404   2
   5   2   8 2.25716 3.63825   1
  -5   2  -8 -1.7289 2.39621   4
  -6  -2  -8 -3.2876 4.52017   2
  -6  -2  -8 2.17896 2.76532   1
  -6  -2  -8 2.78580 3.23248   1
   6   2   8 -0.6228 3.48627   1
  -6   2  -8 8.09900 4.32908   2
  -7  -2  -8 335.911 12.2074   1
  -7  -2  -8 350.108 18.5970   2
   7   2   8 306.164 15.2957   1
  -7   2  -8 348.790 16.2260   2
  -8  -2  -8 14.7963 6.56892   2
  -8  -2  -8 7.67388 3.95577   1
   8   2   8 21.4887 6.14595   1
  -8   2  -8 25.6085 6.54978   2
  -9  -2  -8 60.2028 7.31390   1
  -9  -2  -8 77.5072 12.2856   2
  -9   2  -8 77.5072 10.9290   2
   9   2   8 68.5475 11.3507   1
 -10  -2  -8 127.881 9.56420   1
 -10  -2  -8 155.613 16.7163   2
 -10   2  -8 135.723 14.6773   2
 -11  -2  -8 -1.8540 5.46142   2
 -11  -2  -8 3.78643 4.54948   1
 -11   2  -8 -2.7524 5.28616   2
 -12  -2  -8 23.0326 8.93997   2
 -12  -2  -8 26.1584 6.36260   1
 -12   2  -8 24.7124 9.04429   2
  12  -3  -8 -5.7037 4.47732   1
  12  -3  -8 6.62889 7.83470   3
  12   3  -8 1.61283 3.69668   1
  11  -3  -8 3.88880 5.05660   1
  11   3  -8 10.6895 6.00692   3
  11   3  -8 13.3219 4.93028   1
  10  -3  -8 100.526 12.8947   1
  10   3  -8 101.699 9.10623   1
  10   3  -8 82.2329 11.0697   3
   9  -3  -8 0.28128 3.77797   1
   9   3  -8 2.26146 4.92928   3
   9   3  -8 1.12830 3.00713   1
   8  -3  -8 165.396 12.0875   1
   8   3  -8 154.451 12.4429   3
  -8   3   8 168.169 12.9373   4
   7  -3  -8 155.466 11.1292   1
   7   3  -8 152.924 12.3974   3
  -7   3   8 148.469 12.5985   4
   6  -3  -8 125.984 11.0511   1
   6   3  -8 132.851 13.0612   3
  -6   3   8 153.205 10.8638   4
   5  -3  -8 665.918 20.0531   1
   5   3  -8 645.423 23.2191   3
  -5   3   8 676.058 20.8144   4
   4  -3  -8 13.4162 4.28221   1
   4  -3  -8 8.50478 4.59399   2
   4   3  -8 8.63540 5.20067   3
  -4   3   8 17.0037 4.82830   4
   3  -3  -8 259.242 14.2002   2
   3  -3  -8 266.312 11.6856   1
  -3   3   8 273.639 12.4077   4
   2  -3  -8 32.3591 7.57465   3
   2  -3  -8 21.4972 4.47777   1
   2  -3  -8 27.5371 6.13559   2
  -2   3   8 14.4851 4.22336   1
  -2   3   8 22.7905 4.70915   4
   1  -3  -8 64.0860 8.80808   2
   1  -3  -8 75.4095 10.0723   3
   1  -3  -8 69.6911 6.65602   1
  -1   3   8 77.8516 8.84081   1
  -1   3   8 61.6762 6.61767   4
   0  -3  -8 10.9911 3.58331   1
   0  -3  -8 8.51974 4.37872   2
   0  -3  -8 12.5034 5.20302   3
   0   3  -8 13.4764 3.47988   2
   0   3   8 -1.2963 2.84730   1
   0   3   8 5.59733 3.33744   4
  -1  -3  -8 189.180 12.0951   2
  -1  -3  -8 201.050 12.4482   3
  -1  -3  -8 208.658 9.52137   1
  -1   3  -8 193.118 8.55948   2
   1   3   8 195.775 9.95170   4
   1   3   8 222.197 11.0713   1
  -2  -3  -8 0.82631 3.95765   2
  -2  -3  -8 0.31542 2.97178   1
  -2  -3  -8 1.60994 4.03910   3
   2   3   8 1.28528 3.01391   4
  -2   3  -8 3.58591 2.77745   2
   2   3   8 3.08978 3.31189   1
  -3  -3  -8 2.64030 3.19828   1
  -3  -3  -8 -1.0869 3.90965   3
  -3  -3  -8 8.45602 4.85686   2
   3   3   8 3.36168 3.65768   1
   3   3   8 0.39981 3.05439   4
  -3   3  -8 1.31726 1.65266   4
  -3   3  -8 2.62537 2.94746   2
  -4  -3  -8 -3.4725 3.43769   3
  -4  -3  -8 -5.5548 3.71701   2
  -4  -3  -8 0.27116 3.38403   1
   4   3   8 -1.7839 3.11631   4
  -4   3  -8 0.68666 1.98538   4
   4   3   8 3.37645 3.44531   1
  -4   3  -8 -1.6250 2.52612   2
  -5  -3  -8 95.6498 9.13406   3
  -5  -3  -8 101.130 8.01788   1
  -5  -3  -8 104.849 12.2306   2
   5   3   8 91.3003 8.53769   4
   5   3   8 118.146 10.9269   1
  -5   3  -8 87.6307 6.02828   4
  -5   3  -8 109.076 8.27195   2
  -6  -3  -8 -9.6099 3.72646   2
  -6  -3  -8 1.77103 3.75152   1
  -6   3  -8 -1.0324 3.58287   2
   6   3   8 4.62460 4.24179   1
  -7  -3  -8 16.6756 4.99254   1
  -7  -3  -8 3.52038 5.42921   2
   7   3   8 17.5892 5.65516   1
  -7   3  -8 14.5554 5.31548   2
  -8  -3  -8 29.7169 8.28445   2
  -8  -3  -8 24.6476 5.81239   1
  -8   3  -8 29.5407 6.85205   2
   8   3   8 22.7467 6.60213   1
  -9  -3  -8 259.944 13.5204   1
  -9  -3  -8 281.212 19.4232   2
   9   3   8 248.241 15.9884   1
  -9   3  -8 243.861 15.1800   2
 -10  -3  -8 83.5007 9.59410   1
 -10  -3  -8 107.953 14.7108   2
 -10   3  -8 112.739 12.9287   2
  10   3   8 87.2077 11.6199   1
 -11  -3  -8 115.054 15.7729   2
 -11  -3  -8 139.070 12.5917   1
  11   3   8 159.602 20.6054   1
 -11   3  -8 128.500 14.6158   2
 -12  -3  -8 1.82836 5.25407   1
 -12  -3  -8 -8.0577 5.49875   2
 -12   3  -8 -9.0529 4.99265   2
  12  -4  -8 1.82244 5.91552   1
  12   4  -8 13.7639 5.03437   1
  11  -4  -8 24.3551 8.24372   1
  11   4  -8 14.2712 4.55947   1
  10  -4  -8 142.591 14.8746   1
  10   4  -8 119.443 8.11750   1
   9  -4  -8 28.6407 6.87399   1
  -9   4   8 33.1544 7.95187   4
   8  -4  -8 560.601 21.7631   1
  -8   4   8 540.836 21.9399   4
   7  -4  -8 52.6783 8.77883   1
  -7   4   8 75.0606 9.94710   4
   6  -4  -8 102.137 10.0830   1
  -6   4   8 127.972 12.1212   4
   5  -4  -8 65.2931 7.94841   1
  -5   4   8 59.7338 8.17025   4
   4  -4  -8 47.9992 7.98810   2
   4  -4  -8 46.0603 7.07416   1
  -4   4   8 42.5219 7.22151   4
   3  -4  -8 32.3458 7.17533   2
   3  -4  -8 18.6475 5.09559   1
  -3   4   8 22.4525 5.61476   4
   2  -4  -8 256.665 14.3627   2
   2  -4  -8 261.118 12.2991   1
  -2   4   8 273.775 12.8640   4
   1  -4  -8 177.259 12.2507   2
   1  -4  -8 163.716 9.83983   1
  -1   4   8 187.498 10.8306   4
  -1   4   8 195.725 11.4885   1
   0  -4  -8 94.4868 8.67080   1
   0  -4  -8 96.3853 10.8005   2
   0   4   8 92.7949 8.92665   4
   0   4   8 83.1474 8.50589   1
  -1  -4  -8 195.840 12.9580   2
  -1  -4  -8 192.298 10.4210   1
  -1  -4  -8 201.936 13.1464   3
   1   4   8 206.405 11.1627   4
  -1   4  -8 202.828 7.71551   2
   1   4   8 193.758 11.2618   1
  -2  -4  -8 52.3326 7.89552   3
  -2  -4  -8 42.6190 7.80820   2
  -2  -4  -8 40.8149 6.04548   1
   2   4   8 39.3531 6.72086   1
  -2   4  -8 48.9189 4.91092   2
   2   4   8 44.2456 6.65377   4
  -3  -4  -8 301.245 14.2940   3
  -3  -4  -8 320.706 16.6661   2
  -3  -4  -8 298.357 12.9522   1
   3   4   8 273.047 13.8773   1
  -3   4  -8 291.709 10.2008   2
   3   4   8 331.090 14.0574   4
  -4  -4  -8 12.9245 4.95116   3
  -4  -4  -8 17.7763 5.09691   1
  -4  -4  -8 15.2031 5.93108   2
  -4   4  -8 15.2614 2.70727   4
  -4   4  -8 16.8306 2.87997   4
   4   4   8 15.3808 5.18725   4
   4   4   8 16.4650 5.49226   1
  -4   4  -8 10.6057 3.51328   2
  -5  -4  -8 -1.0081 4.59765   2
  -5  -4  -8 5.24866 3.77086   3
  -5  -4  -8 3.27115 4.17878   1
  -5   4  -8 4.33641 2.84581   4
   5   4   8 4.72523 4.38401   1
  -5   4  -8 5.58336 3.26778   2
   5   4   8 4.40638 3.93410   4
  -6  -4  -8 94.7718 9.80205   1
  -6  -4  -8 93.7451 12.2292   2
  -6  -4  -8 97.8378 7.95403   3
  -6   4  -8 96.2213 8.87738   2
   6   4   8 94.7701 10.5375   1
  -7  -4  -8 157.274 11.2596   1
  -7  -4  -8 150.596 15.6142   2
  -7   4  -8 133.360 10.0460   2
   7   4   8 152.388 14.5484   1
  -8  -4  -8 238.719 13.6473   1
  -8  -4  -8 178.358 17.4786   2
  -8   4  -8 235.461 13.4842   2
   8   4   8 220.237 15.2516   1
  -9  -4  -8 82.3092 12.7918   2
  -9  -4  -8 90.1048 10.5368   1
   9   4   8 77.9067 11.1554   1
  -9   4  -8 105.735 11.6025   2
 -10  -4  -8 2.29788 4.88322   1
 -10  -4  -8 4.28659 6.58383   2
  10   4   8 6.90559 6.23002   1
 -10   4  -8 16.0829 6.24612   2
 -11  -4  -8 14.3215 8.37575   2
 -11  -4  -8 9.13615 5.78159   1
  11   4   8 11.0700 7.09024   1
 -11   4  -8 20.4834 7.27622   2
  12   4   8 0.64029 6.17158   1
  11  -5  -8 -2.1208 5.08028   1
  10  -5  -8 55.9416 9.86513   1
 -10   5   8 47.3327 9.94028   4
   9  -5  -8 25.0025 7.15082   1
  -9   5   8 22.3614 7.22244   4
   8  -5  -8 12.3361 5.61799   1
  -8   5   8 16.3255 6.30299   4
   7  -5  -8 11.7369 5.93688   1
  -7   5   8 21.5346 6.73237   4
   6  -5  -8 138.467 13.2069   1
  -6   5   8 122.739 12.0924   4
   5  -5  -8 141.050 11.3277   1
  -5   5   8 134.941 12.3491   4
   4  -5  -8 125.572 12.7094   2
   4  -5  -8 140.868 10.7368   1
  -4   5   8 132.862 12.2256   4
   3  -5  -8 37.5350 6.85205   1
   3  -5  -8 42.2287 8.39846   2
  -3   5   8 23.9339 6.12269   4
   2  -5  -8 291.601 15.8866   2
   2  -5  -8 285.022 13.8608   1
  -2   5   8 282.009 14.2499   4
   1  -5  -8 33.3090 6.44089   1
   1  -5  -8 21.8974 6.36419   2
  -1   5   8 18.7561 5.48532   4
  -1   5   8 42.1409 7.96615   1
   0  -5  -8 98.6584 11.3107   2
   0  -5  -8 76.7057 8.46539   1
   0   5   8 117.491 10.4777   4
   0   5   8 101.178 10.0273   1
  -1  -5  -8 142.869 13.5192   2
  -1  -5  -8 142.993 10.2106   1
   1   5   8 156.706 11.2550   1
   1   5   8 158.760 11.0800   4
  -2  -5  -8 -6.3774 4.28617   3
  -2  -5  -8 5.13697 5.14429   2
  -2  -5  -8 -5.5656 3.08179   1
   2   5   8 -3.9846 3.51211   4
  -2   5  -8 0.22443 1.64878   2
   2   5   8 3.86300 4.40487   1
  -3  -5  -8 108.398 10.3312   1
  -3  -5  -8 102.651 11.9181   2
  -3  -5  -8 111.149 10.7019   3
   3   5   8 90.8499 9.66263   4
  -3   5  -8 91.2900 5.10372   2
   3   5   8 107.811 10.6907   1
  -4  -5  -8 77.5444 10.6304   2
  -4  -5  -8 101.070 10.2054   3
  -4  -5  -8 88.8827 9.47539   1
  -4   5  -8 83.1729 5.16320   4
  -4   5  -8 97.1187 5.93757   2
   4   5   8 86.7247 10.2523   1
   4   5   8 86.5626 9.78463   4
  -5  -5  -8 41.6548 7.53863   1
  -5  -5  -8 34.2421 6.38487   3
  -5  -5  -8 39.8704 8.62655   2
   5   5   8 35.2543 7.48450   1
   5   5   8 50.5862 8.21113   4
  -5   5  -8 49.8948 5.29338   4
  -5   5  -8 49.2281 5.55383   2
  -6  -5  -8 5.64551 4.54957   1
  -6  -5  -8 -6.4257 4.15181   2
  -6  -5  -8 2.77495 3.38611   3
  -6   5  -8 -4.0876 2.48205   4
  -6   5  -8 -1.0625 2.80176   2
   6   5   8 -1.2895 4.47983   1
   6   5   8 -1.9285 4.73665   4
  -7  -5  -8 388.222 21.4805   2
  -7  -5  -8 360.833 17.1681   1
   7   5   8 356.712 18.6682   1
  -7   5  -8 375.470 14.7156   2
  -8  -5  -8 52.9875 8.76040   1
  -8  -5  -8 85.3537 13.2034   2
  -8   5  -8 78.9996 9.01820   2
   8   5   8 64.9118 10.8086   1
  -9  -5  -8 189.224 19.8616   2
  -9  -5  -8 195.845 13.9131   1
   9   5   8 145.824 15.2081   1
  -9   5  -8 192.643 12.7004   2
 -10  -5  -8 -1.7804 5.41172   2
 -10  -5  -8 -0.4834 4.96042   1
  10   5   8 -1.3238 5.86489   1
 -10   5  -8 0.44781 5.01770   2
 -11  -5  -8 45.2264 11.3571   2
 -11  -5  -8 28.1664 8.23930   1
  11   5   8 16.3560 8.23319   1
  11  -6  -8 13.8730 7.53827   1
 -11   6   8 17.8552 7.96697   4
  10  -6  -8 39.9993 9.83428   1
 -10   6   8 37.1942 9.36133   4
   9  -6  -8 96.4649 13.1809   1
  -9   6   8 83.0970 12.1564   4
   8  -6  -8 55.5175 9.68446   1
  -8   6   8 56.6279 10.0229   4
   7  -6  -8 -0.9301 4.88655   1
  -7   6   8 1.08506 5.36331   4
   6  -6  -8 64.5550 10.6933   1
  -6   6   8 53.5802 9.75686   4
   5  -6  -8 4.55095 4.57588   1
  -5   6   8 16.3674 6.17344   4
   4  -6  -8 25.3492 7.21507   2
   4  -6  -8 17.0984 5.96764   1
  -4   6   8 24.0238 6.66714   4
   3  -6  -8 27.3235 7.00394   2
   3  -6  -8 15.6429 5.59087   1
  -3   6   8 26.0059 6.99858   4
   2  -6  -8 6.22499 5.30128   2
   2  -6  -8 4.54702 4.41169   1
  -2   6   8 7.02990 4.73834   4
   1  -6  -8 273.288 14.3164   1
   1  -6  -8 246.734 15.4192   2
  -1   6   8 252.628 14.5649   1
  -1   6   8 254.461 14.6277   4
   0  -6  -8 115.282 10.8883   1
   0  -6  -8 146.141 14.1923   2
   0   6   8 103.079 10.9482   1
   0   6   8 125.915 11.8838   4
  -1  -6  -8 44.1914 8.29210   2
  -1  -6  -8 34.8216 6.89360   1
   1   6   8 49.0148 8.16768   1
   1   6   8 41.3135 7.56792   4
  -2  -6  -8 11.1224 5.45556   1
  -2  -6  -8 11.3431 5.90229   2
   2   6   8 13.3366 6.03520   1
   2   6   8 -0.9087 4.08802   4
  -3  -6  -8 -0.4564 4.56382   2
  -3  -6  -8 1.59051 4.95096   3
  -3  -6  -8 -4.9178 3.65343   1
   3   6   8 10.4237 5.28828   4
  -3   6  -8 -0.7230 1.87547   4
   3   6   8 1.33575 4.10092   1
  -4  -6  -8 -0.6933 4.93850   2
  -4  -6  -8 4.51544 4.69996   3
  -4  -6  -8 0.21838 4.19825   1
   4   6   8 -3.7012 3.69219   1
  -4   6  -8 4.87467 2.44007   4
   4   6   8 3.40050 4.67349   4
  -5  -6  -8 117.977 13.7276   2
  -5  -6  -8 110.134 12.2627   1
  -5  -6  -8 116.602 10.4674   3
  -5   6  -8 101.231 6.98154   4
   5   6   8 100.641 11.4106   4
   5   6   8 85.7062 11.1782   1
  -6  -6  -8 170.595 16.5725   3
  -6  -6  -8 195.282 18.5416   2
  -6  -6  -8 184.553 13.3368   1
  -6   6  -8 159.394 9.25623   4
   6   6   8 182.773 14.1161   1
   6   6   8 178.753 13.6653   4
  -7  -6  -8 10.7856 6.60230   2
  -7  -6  -8 18.3049 6.78999   1
   7   6   8 18.9947 7.41627   1
  -7   6  -8 18.7371 4.90162   4
  -8  -6  -8 27.6091 8.95167   2
  -8  -6  -8 20.4229 6.83060   1
  -8   6  -8 13.4010 4.83777   4
   8   6   8 24.7426 8.38408   1
  -9  -6  -8 16.0192 6.70644   1
  -9  -6  -8 38.3365 9.79387   2
   9   6   8 15.1726 7.17681   1
 -10  -6  -8 1.73971 7.27572   2
 -10  -6  -8 -8.4696 4.23910   1
  10   6   8 3.09686 6.26684   1
  10  -7  -8 2.28594 5.67304   1
 -10   7   8 18.0331 8.05548   4
  10   7  -8 8.50360 6.26413   4
   9  -7  -8 4.33614 5.59413   1
  -9   7   8 4.66663 6.01608   4
   9   7  -8 -1.7549 5.01560   4
   8  -7  -8 -2.8923 4.52764   1
   8   7  -8 1.19255 4.36488   4
  -8   7   8 -2.2080 5.33407   4
   7  -7  -8 44.1284 9.30049   1
   7   7  -8 50.3127 8.39116   4
  -7   7   8 59.9006 10.8518   4
   6  -7  -8 384.425 19.4466   1
  -6   7   8 387.664 20.0084   4
   5  -7  -8 1.08766 4.53391   1
  -5   7   8 4.46900 5.59554   4
   4  -7  -8 232.633 14.8386   1
   4  -7  -8 278.649 17.0459   2
  -4   7   8 195.844 14.1564   4
   3  -7  -8 33.0236 7.85417   2
   3  -7  -8 31.3387 7.11341   1
  -3   7   8 40.3270 8.16149   4
   3   7  -8 44.1179 5.77913   4
   2  -7  -8 1111.81 33.1134   2
   2  -7  -8 1085.98 30.8735   1
   2   7  -8 1073.43 22.4520   4
  -2   7   8 1094.93 31.3627   4
   1  -7  -8 304.279 17.4001   2
   1  -7  -8 311.601 16.3972   1
  -1   7   8 312.441 16.5818   4
   1   7  -8 294.317 9.94754   4
   0  -7  -8 61.3328 9.72264   2
   0  -7  -8 81.2822 10.2527   1
   0   7   8 76.8753 10.4195   4
   0   7  -8 70.9727 5.04751   4
   0   7   8 63.8639 9.60902   1
  -1  -7  -8 42.1623 8.38771   1
  -1  -7  -8 33.4820 7.96171   2
  -1   7  -8 29.9071 3.54221   4
   1   7   8 34.7158 7.36371   4
   1   7   8 27.3225 6.67067   1
  -2  -7  -8 4.76190 5.50045   2
  -2  -7  -8 6.85778 5.08069   1
  -2   7  -8 8.08098 2.68159   4
   2   7   8 11.1181 5.89774   4
   2   7   8 2.54359 4.57169   1
  -3  -7  -8 500.226 22.9201   2
  -3  -7  -8 419.362 19.3213   1
   3   7   8 428.903 19.7281   1
  -3   7  -8 462.629 11.9660   4
   3   7   8 472.279 20.3773   4
  -4  -7  -8 47.9067 10.0147   2
  -4  -7  -8 62.2555 9.17916   3
  -4  -7  -8 44.2342 8.58040   1
  -4   7  -8 55.0596 5.43819   4
   4   7   8 48.0314 9.38918   1
   4   7   8 42.5468 8.68622   4
  -5  -7  -8 60.2812 10.9421   2
  -5  -7  -8 59.4902 9.47801   1
  -5  -7  -8 80.7779 9.24627   3
   5   7   8 74.0328 10.5095   4
  -5   7  -8 66.2437 6.56873   4
   5   7   8 74.2322 11.5661   1
  -6  -7  -8 -2.9304 5.09590   2
  -6  -7  -8 3.29552 5.42518   1
   6   7   8 -8.2070 4.26344   1
   6   7   8 -0.4521 5.30046   4
  -6   7  -8 -3.5535 3.00532   4
  -7  -7  -8 -2.7828 5.15101   2
  -7  -7  -8 -5.2767 4.27266   1
  -7   7  -8 2.82686 3.77531   4
   7   7   8 -4.6305 4.56355   1
  -8  -7  -8 31.1468 8.09225   1
  -8  -7  -8 16.4933 7.93948   2
   8   7   8 25.6332 7.66795   1
  -8   7  -8 22.4000 5.78524   4
  -9  -7  -8 31.4174 9.77182   2
  -9  -7  -8 14.9846 7.09717   1
   9   7   8 22.2839 8.52769   1
  -9   7  -8 20.2987 6.15408   4
 -10  -7  -8 16.8398 7.63892   1
 -10  -7  -8 23.4431 9.83743   2
  10   7   8 30.8417 9.25907   1
   9  -8  -8 2.06446 5.79002   1
   9   8  -8 8.83989 6.11506   4
  -9   8   8 2.67347 6.55739   4
   8  -8  -8 70.5559 12.0889   1
   8   8  -8 36.3849 8.10370   4
  -8   8   8 25.5345 8.83843   4
   7  -8  -8 85.3764 12.6123   1
   7   8  -8 92.5619 10.9484   4
  -7   8   8 86.5089 12.5454   4
   6  -8  -8 65.1297 10.3146   1
  -6   8   8 34.5503 8.78659   4
   6   8  -8 64.0261 8.83620   4
   5  -8  -8 -1.0599 4.78634   1
  -5   8   8 -0.4531 4.88766   4
   5   8  -8 0.91129 3.84465   4
   4  -8  -8 11.2003 6.20637   1
   4  -8  -8 6.08599 5.56855   2
   4   8  -8 9.00002 4.29095   4
  -4   8   8 13.2434 6.78137   4
   3  -8  -8 -6.0412 3.93678   2
   3  -8  -8 -2.3571 3.95008   1
  -3   8   8 -0.5125 5.16792   4
   3   8  -8 4.34274 3.65423   4
   2  -8  -8 310.349 18.0037   2
   2  -8  -8 295.164 16.9211   1
   2   8  -8 291.546 11.9979   4
  -2   8   8 310.033 17.5459   4
   1  -8  -8 242.246 15.3760   1
   1  -8  -8 242.181 16.5428   2
  -1   8   8 216.942 15.4320   4
   1   8  -8 246.027 10.1823   4
   0  -8  -8 3.82057 4.97961   1
   0  -8  -8 0.55888 5.09339   2
   0   8  -8 -1.9316 2.73113   4
   0   8   8 3.65887 5.40136   4
  -1  -8  -8 0.82149 4.71839   1
  -1  -8  -8 1.53097 4.65161   2
   1   8   8 -5.9320 4.46603   4
   1   8   8 3.51819 4.61426   1
  -1   8  -8 4.07835 2.71083   4
  -2  -8  -8 247.078 15.8538   1
  -2  -8  -8 252.421 17.0473   2
   2   8   8 268.440 16.9307   4
   2   8   8 278.271 16.8245   1
  -2   8  -8 248.678 9.64792   4
  -3  -8  -8 7.86344 6.52990   2
  -3  -8  -8 15.1119 6.76083   1
   3   8   8 14.5387 5.89179   1
  -3   8  -8 11.1228 3.54571   4
   3   8   8 8.40730 6.32189   4
  -4  -8  -8 656.583 27.7702   2
  -4  -8  -8 644.466 25.3928   1
   4   8   8 655.160 26.1306   4
   4   8   8 613.473 25.1530   1
  -4   8  -8 659.391 17.5329   4
  -5  -8  -8 23.5754 7.39357   1
  -5  -8  -8 35.5586 9.14252   2
  -5  -8  -8 46.4629 12.0108   3
   5   8   8 52.5881 9.94251   4
  -5   8  -8 46.9089 6.39026   4
   5   8   8 34.9601 8.13367   1
  -6  -8  -8 104.245 14.1875   2
  -6  -8  -8 90.9526 11.9480   1
   6   8   8 104.264 13.5666   4
  -6   8  -8 107.009 9.26867   4
   6   8   8 101.468 13.2200   1
  -7  -8  -8 30.2243 8.90850   1
  -7  -8  -8 29.5801 9.66265   2
  -7   8  -8 29.1514 6.15272   4
   7   8   8 42.2494 9.99188   1
  -8  -8  -8 104.797 13.1243   1
  -8  -8  -8 116.934 16.7044   2
   8   8   8 108.132 13.9108   1
  -8   8  -8 119.436 11.4734   4
  -9  -8  -8 122.174 14.4414   1
  -9  -8  -8 141.663 18.1194   2
  -9   8  -8 132.727 12.8647   4
   9   8   8 113.014 14.8246   1
   8  -9  -8 57.8670 11.3138   1
   8   9  -8 54.5337 10.1314   4
  -8   9   8 36.8095 10.4903   4
   7  -9  -8 106.397 14.3027   1
  -7   9   8 89.4887 13.0904   4
   7   9  -8 101.756 12.1717   4
   6  -9  -8 0.21105 5.28471   1
  -6   9   8 13.4929 7.26453   4
   6   9  -8 -1.7630 3.76419   4
   5  -9  -8 18.2574 7.14248   1
   5   9  -8 14.1730 5.29692   4
  -5   9   8 11.3268 7.60493   4
   4  -9  -8 36.6346 9.02110   2
   4  -9  -8 35.1388 8.40297   1
   4   9  -8 47.9290 7.53846   4
  -4   9   8 40.5485 8.86535   4
   3  -9  -8 82.1434 12.2264   2
   3  -9  -8 74.7489 11.4076   1
  -3   9   8 62.6986 10.7171   4
   3   9  -8 79.8146 8.76041   4
   2  -9  -8 39.5669 8.89946   2
   2  -9  -8 61.3716 10.9487   1
   2   9  -8 69.4902 7.69887   4
  -2   9   8 48.4260 9.81170   4
   1  -9  -8 314.332 19.2217   2
   1  -9  -8 358.645 19.4752   1
  -1   9   8 400.065 20.7981   4
   1   9  -8 356.815 13.5520   4
   0  -9  -8 58.6082 9.92519   1
   0  -9  -8 64.0169 10.8915   2
   0   9   8 62.3587 10.9687   4
   0   9  -8 76.2196 7.24889   4
  -1  -9  -8 191.899 17.6455   2
  -1  -9  -8 150.814 14.2842   1
   1   9   8 174.214 16.5623   4
   1   9   8 165.992 15.8839   1
  -1   9  -8 163.554 9.13180   4
  -2  -9  -8 250.930 17.5472   2
  -2  -9  -8 252.912 16.9384   1
   2   9   8 312.174 18.5064   1
  -2   9  -8 258.690 11.1075   4
   2   9   8 226.396 16.9778   4
  -3  -9  -8 46.0430 9.11091   1
  -3  -9  -8 54.8581 10.6372   2
   3   9   8 48.4152 9.86399   1
   3   9   8 53.0563 10.5821   4
  -3   9  -8 54.3075 6.57701   4
  -4  -9  -8 -3.7654 5.41201   2
  -4  -9  -8 1.02701 4.85679   1
  -4   9  -8 -4.3860 2.81047   4
   4   9   8 3.49884 5.33537   1
   4   9   8 -4.1393 5.04410   4
  -5  -9  -8 15.4230 7.15778   1
  -5  -9  -8 18.1265 8.07323   2
   5   9   8 20.5644 8.08576   4
   5   9   8 12.4170 6.59858   1
  -5   9  -8 26.8319 5.48022   4
  -6  -9  -8 4.46798 6.97041   2
  -6  -9  -8 1.94261 6.10967   1
  -6   9  -8 -3.3518 3.28780   4
   6   9   8 10.5604 9.06419   4
   6   9   8 0.85789 5.27138   1
  -7  -9  -8 6.23180 7.57204   2
  -7  -9  -8 1.00539 5.90158   1
  -7   9  -8 2.59363 4.31493   4
   7   9   8 -2.0950 5.63870   1
   6 -10  -8 -4.2962 5.35717   1
   6  10  -8 3.69859 5.32370   4
  -6  10   8 -6.5070 5.25489   4
   5 -10  -8 0.78141 5.63232   1
   5  10  -8 5.05481 5.28669   4
  -5  10   8 3.82510 6.57678   4
   4 -10  -8 -1.0936 5.63180   2
   4 -10  -8 5.27513 6.01872   1
  -4  10   8 0.77124 6.15478   4
   4  10  -8 8.27961 5.53424   4
   3 -10  -8 173.803 18.1898   1
   3 -10  -8 217.283 16.8362   2
  -3  10   8 222.946 19.5187   4
   3  10  -8 194.234 12.5639   4
   2 -10  -8 68.0267 11.6654   2
   2 -10  -8 59.2367 11.0239   1
   2  10  -8 63.4716 8.23436   4
  -2  10   8 41.2297 9.61316   4
   1 -10  -8 43.0106 9.73727   2
   1 -10  -8 46.3691 10.3768   1
  -1  10   8 48.7246 10.4105   4
   1  10  -8 46.7109 7.05440   4
   0 -10  -8 55.9968 10.6081   2
   0 -10  -8 63.1580 11.6301   1
   0  10   8 61.6068 11.3366   4
   0  10  -8 53.3912 7.25698   4
  -1 -10  -8 31.7527 8.61684   2
  -1 -10  -8 38.7779 9.46192   1
  -1  10  -8 27.9581 5.69011   4
   1  10   8 40.8153 9.48358   4
  -2 -10  -8 5.08940 5.65285   2
  -2 -10  -8 6.78160 6.88738   1
   2  10   8 5.25626 6.85431   4
  -2  10  -8 -5.5062 3.18586   4
   2  10   8 -1.4259 4.21460   1
  -3 -10  -8 287.151 19.7703   2
  -3 -10  -8 254.602 18.1266   1
   3  10   8 240.484 18.5966   4
  -3  10  -8 245.040 12.3469   4
   3  10   8 241.807 17.6232   1
  -4 -10  -8 7.24034 6.68080   1
  -4 -10  -8 11.1694 6.87524   2
   4  10   8 2.48412 5.80422   1
  -4  10  -8 -3.4430 3.68608   4
   4  10   8 5.93140 7.33369   4
  -5 -10  -8 122.049 16.3852   2
  -5 -10  -8 113.888 15.2215   1
  -5  10  -8 116.989 10.7487   4
   5  10   8 125.595 15.6499   4
   5  10   8 137.524 15.6806   1
  -6 -10  -8 7.91696 7.69626   2
  -6 -10  -8 6.07690 6.80463   1
  -6  10  -8 0.03428 4.24833   4
   6  10   8 -1.1798 5.40630   1
   4 -11  -8 85.8804 13.0829   2
   4 -11  -8 111.222 15.0679   1
  -4  11   8 117.810 16.0149   4
   4  11  -8 112.361 12.1671   4
   3 -11  -8 25.7457 8.30238   2
   3 -11  -8 34.7127 10.0549   1
  -3  11   8 33.3106 10.0552   4
   3  11  -8 46.8132 8.21691   4
   2 -11  -8 6.06625 6.30974   2
   2 -11  -8 4.63285 6.56376   1
  -2  11   8 10.3003 7.54293   4
   2  11  -8 11.9985 5.50553   4
   1 -11  -8 28.8970 8.84862   1
   1 -11  -8 34.8246 9.31691   2
   1  11  -8 37.8732 7.38182   4
  -1  11   8 32.9008 9.69294   4
   0 -11  -8 22.6231 8.05956   2
   0 -11  -8 14.4204 7.23633   1
   0  11  -8 16.9950 5.72268   4
   0  11   8 12.5025 8.06077   4
  -1 -11  -8 3.32252 6.03172   2
  -1 -11  -8 10.6425 7.50754   1
  -1  11  -8 6.43797 4.83873   4
   1  11   8 -0.0641 6.73943   4
  -2 -11  -8 10.9025 7.45011   1
  -2 -11  -8 4.77922 6.76590   2
   2  11   8 0.05105 6.36540   4
  -2  11  -8 -2.3640 3.70004   4
  -3 -11  -8 0.94652 6.16358   2
  -3 -11  -8 -1.6835 5.48460   1
  -3  11  -8 -3.4741 3.89780   4
   3  11   8 -7.5996 5.90746   4
   3  11   8 -2.2689 5.29459   1
  12   0  -9 6.14307 6.49578   3
  12   0  -9 0.14861 4.73315   1
  11   0  -9 16.0418 6.01109   1
  11   0  -9 12.4143 6.95281   3
  10   0  -9 -1.9740 5.18806   3
  10   0  -9 0.73788 3.75727   1
   9   0  -9 34.4272 6.38532   1
   9   0  -9 31.8362 8.23766   3
   8   0  -9 1.18893 3.37982   1
   8   0  -9 1.39466 5.10972   3
   7   0  -9 3.72292 5.26347   3
   7   0  -9 6.75026 3.48036   1
   6   0  -9 0.52449 2.74087   1
   6   0  -9 4.23460 2.51333   1
   6   0  -9 -3.0569 4.56961   3
   5   0  -9 659.914 24.2838   3
   4   0  -9 -9.9478 3.31538   3
   3   0  -9 59.6345 7.99030   2
   3   0  -9 61.3706 9.55271   3
   2   0  -9 2.53479 4.48546   3
  -2   0   9 -0.9344 2.36629   1
   2   0  -9 -3.6065 2.87639   2
   1   0  -9 489.982 17.4627   2
   1   0  -9 495.103 19.7160   3
   0   0  -9 -0.8901 4.24452   3
   0   0  -9 -3.4714 3.30902   2
  -1   0  -9 2222.06 46.2679   3
  -1   0  -9 2277.82 42.9235   2
  -2   0  -9 3.20426 4.34084   3
  -2   0  -9 0.68227 3.39614   2
  -3   0  -9 1663.28 36.3127   2
  -4   0  -9 -4.9683 3.05571   2
  -5   0  -9 270.296 14.9295   2
  -6   0  -9 1.08699 4.44870   2
  -7   0  -9 0.83378 4.86699   2
  -8   0  -9 0.75455 5.15391   2
  -9   0  -9 30.7953 8.87597   2
 -10   0  -9 -1.0907 5.40731   2
 -11   0  -9 103.243 14.2485   2
 -12   0  -9 1.50817 6.55255   2
  12  -1  -9 8.54275 5.91815   1
  12  -1  -9 20.2620 7.92603   3
  12   1  -9 10.3620 6.58924   3
  12   1  -9 1.54553 4.32209   1
  11  -1  -9 440.937 19.3960   1
  11  -1  -9 395.505 22.0199   3
  11   1  -9 417.297 17.2423   1
  11   1  -9 412.822 21.5656   3
  10  -1  -9 175.374 12.4179   1
  10  -1  -9 178.266 17.8817   3
  10   1  -9 190.965 11.3556   1
  10   1  -9 174.113 14.5810   3
   9  -1  -9 14.1471 7.21831   3
   9  -1  -9 17.9569 5.45568   1
   9   1  -9 22.1638 7.52405   3
   9   1  -9 21.3440 4.87825   1
   8  -1  -9 107.488 13.5433   3
   8  -1  -9 109.736 10.2124   1
   8   1  -9 87.3501 7.69706   1
   8   1  -9 107.819 12.7877   3
   7  -1  -9 433.158 20.9740   3
   7  -1  -9 414.683 15.1143   1
   7   1  -9 405.875 12.1311   1
   7   1  -9 403.011 19.6511   3
   6  -1  -9 95.4641 7.59158   1
   6  -1  -9 105.169 12.4438   3
   6   1  -9 106.671 12.2138   3
   5  -1  -9 163.701 8.20940   1
   5  -1  -9 175.765 8.53703   1
   5  -1  -9 138.522 13.8729   3
   5   1  -9 166.828 13.1314   3
   4  -1  -9 1.92788 2.44591   1
   4  -1  -9 1.19769 2.25211   1
   4  -1  -9 1.30298 4.49492   3
   4   1  -9 1.68580 4.43082   3
   3  -1  -9 123.999 11.3620   2
   3  -1  -9 99.8065 11.2869   3
   3   1  -9 148.582 11.4736   3
   2  -1  -9 29.0143 7.00292   3
   2  -1  -9 27.9892 5.92692   2
  -2   1   9 35.0716 5.31808   1
   2   1  -9 39.1834 6.31583   2
   2   1  -9 29.7213 6.74253   3
   1  -1  -9 15.9966 5.10566   2
   1  -1  -9 3.15259 4.56653   3
   1   1  -9 10.8477 2.92986   4
  -1   1   9 10.2370 3.53806   1
   1   1  -9 10.4789 5.25950   3
   1   1  -9 6.36862 3.59954   2
   0  -1  -9 86.9015 10.0092   3
   0  -1  -9 103.437 10.0740   2
   0   1   9 96.7274 6.92210   1
   0   1  -9 91.1321 10.2097   3
   0   1  -9 100.806 8.09968   2
   0   1  -9 122.226 6.08633   4
  -1  -1  -9 108.884 10.3455   2
  -1  -1  -9 99.7235 10.6197   3
  -1   1  -9 108.354 11.0187   3
  -1   1  -9 108.782 8.37778   2
  -1   1  -9 115.193 5.93543   4
   1   1   9 100.942 7.34606   1
  -2  -1  -9 -0.8708 4.00964   3
  -2  -1  -9 1.26306 3.84278   2
   2   1   9 0.20215 2.58222   1
  -2   1  -9 5.03329 2.48421   4
  -2   1  -9 0.47070 3.39395   2
  -3  -1  -9 114.481 11.0807   2
  -3  -1  -9 71.7375 9.33684   3
  -3   1  -9 95.7107 6.16270   4
  -3   1  -9 82.5290 8.76099   2
   3   1   9 94.1767 7.44243   1
  -4  -1  -9 -0.8768 3.74776   2
  -4   1  -9 1.86259 3.87445   2
  -4   1  -9 3.73008 2.83150   4
   4   1   9 6.50316 3.48498   1
  -5  -1  -9 136.581 13.0335   2
   5   1   9 123.550 12.8620   1
  -5   1  -9 102.939 10.5098   2
  -6  -1  -9 437.493 19.8373   2
  -6   1  -9 402.374 17.8248   2
  -7  -1  -9 5.50008 5.86674   2
  -7   1  -9 8.20656 5.55519   2
  -8  -1  -9 11.7571 6.05331   2
  -8   1  -9 8.09739 5.47455   2
  -9  -1  -9 3.68275 5.31032   2
  -9   1  -9 6.76428 6.12268   2
 -10  -1  -9 16.6350 7.66601   2
 -10   1  -9 1.36572 5.80223   2
 -11  -1  -9 13.8133 7.85639   2
 -11   1  -9 3.30159 6.10180   2
 -12  -1  -9 85.7968 14.6312   2
 -12   1  -9 111.146 15.1827   2
  12  -2  -9 32.2871 9.52277   3
  12  -2  -9 45.1218 9.27128   1
  12   2  -9 44.3197 10.0532   3
  12   2  -9 33.2961 6.82536   1
  11  -2  -9 57.3176 11.6003   3
  11  -2  -9 44.4711 8.56521   1
  11   2  -9 54.6038 10.0237   3
  11   2  -9 46.9803 7.24452   1
  10  -2  -9 10.6655 5.11155   1
  10  -2  -9 11.1392 6.65823   3
  10   2  -9 4.54805 5.70117   3
  10   2  -9 12.9338 4.54816   1
   9  -2  -9 35.2956 6.99717   1
   9  -2  -9 43.9390 9.52447   3
   9   2  -9 37.5600 8.28582   3
   9   2  -9 34.0414 5.17714   1
   8  -2  -9 6.83341 4.39721   1
   8  -2  -9 8.20494 6.15227   3
   8   2  -9 18.4239 6.69122   3
   7  -2  -9 3.62314 5.64947   3
   7  -2  -9 6.62407 4.18736   1
   7   2  -9 6.64164 5.40385   3
   6  -2  -9 11.4627 4.52497   1
   6  -2  -9 6.19885 6.17365   3
   6   2  -9 17.1643 6.44537   3
   5  -2  -9 34.2025 7.94496   3
   5  -2  -9 34.2781 5.68514   1
  -5   2   9 36.4994 6.18315   4
   5   2  -9 37.0310 8.10022   3
   4  -2  -9 134.900 13.2183   3
   4  -2  -9 138.435 8.40319   1
   4  -2  -9 141.018 12.7276   2
  -4   2   9 145.749 9.03315   4
   4   2  -9 150.247 14.1179   3
   3  -2  -9 103.663 10.8151   2
   3  -2  -9 126.112 13.2689   3
   3  -2  -9 103.363 6.86201   1
   3  -2  -9 101.251 6.73152   1
   3   2  -9 80.6107 10.3931   3
  -3   2   9 111.015 7.79999   4
   2  -2  -9 265.696 9.47292   1
   2  -2  -9 252.866 15.3401   3
   2  -2  -9 256.159 13.9197   2
   2  -2  -9 262.357 9.31143   1
  -2   2   9 248.612 10.4342   4
  -2   2   9 250.469 12.0098   1
   2   2  -9 295.580 9.64858   4
   2   2  -9 239.943 14.7285   3
   1  -2  -9 73.1270 9.14311   2
   1  -2  -9 55.2407 8.92487   3
   1  -2  -9 67.1876 5.42116   1
   1  -2  -9 64.5969 4.84649   1
   1   2  -9 59.9596 4.53668   4
   1   2  -9 76.0658 10.0707   3
  -1   2   9 56.0329 7.29983   1
  -1   2   9 70.5114 6.37960   4
   1   2  -9 61.2685 6.92415   2
   0  -2  -9 1056.49 29.5201   3
   0  -2  -9 1050.72 28.5360   2
   0  -2  -9 1062.19 18.8584   1
   0  -2  -9 1073.54 18.7551   1
   0   2  -9 1057.61 24.3147   2
   0   2  -9 1050.21 17.8959   4
   0   2   9 1043.65 24.3547   1
  -1  -2  -9 244.841 13.5093   2
  -1  -2  -9 249.543 14.0618   3
  -1   2  -9 233.571 6.96725   4
  -1   2  -9 229.350 10.9865   2
   1   2   9 233.652 10.9903   1
  -2  -2  -9 905.124 26.3911   3
  -2  -2  -9 929.796 27.1272   2
  -2   2  -9 900.268 16.3984   4
  -2   2  -9 921.054 22.6136   2
   2   2   9 920.174 22.7141   1
  -3  -2  -9 63.5790 8.52784   3
  -3  -2  -9 60.3055 8.91045   2
  -3   2  -9 55.0519 4.65184   4
   3   2   9 51.5395 6.73751   1
  -3   2  -9 72.0394 7.84851   2
  -4  -2  -9 40.4152 7.72927   2
  -4  -2  -9 22.4155 6.01693   3
   4   2   9 38.0587 6.53581   1
  -4   2  -9 35.4337 4.50154   4
  -4   2  -9 32.9788 6.16037   2
  -5  -2  -9 12.8325 5.90534   2
  -5   2  -9 17.0858 5.18364   2
   5   2   9 23.6959 5.35857   1
  -6  -2  -9 30.3836 8.28625   2
   6   2   9 38.4927 6.77335   1
  -6   2  -9 46.9574 7.62344   2
  -7  -2  -9 1.38441 5.10603   2
  -7   2  -9 4.42158 4.98930   2
  -8  -2  -9 25.0278 8.24286   2
  -8   2  -9 27.6920 7.40466   2
  -9  -2  -9 -2.1489 2.93553   1
  -9  -2  -9 -1.1847 5.47997   2
  -9   2  -9 -3.1163 4.49080   2
 -10  -2  -9 2.92869 3.80849   1
 -10  -2  -9 15.3083 7.81487   2
 -10   2  -9 9.63452 6.03914   2
 -11  -2  -9 35.2718 10.3837   2
 -11   2  -9 42.6852 9.56382   2
 -12  -2  -9 -1.1381 6.88041   2
 -12   2  -9 3.91803 6.27888   2
  12  -3  -9 68.4905 13.0439   3
  12  -3  -9 77.5548 10.9875   1
  12   3  -9 118.268 10.6564   1
  11  -3  -9 2.74393 5.23427   1
  11  -3  -9 -3.9686 6.56332   3
  11   3  -9 6.25138 4.02229   1
  11   3  -9 12.9566 6.18382   3
  10  -3  -9 -2.3253 6.45226   3
  10  -3  -9 17.7938 6.24164   1
  10   3  -9 17.3038 6.80475   3
  10   3  -9 13.2485 4.10769   1
   9  -3  -9 156.618 12.3999   1
   9  -3  -9 164.784 17.6357   3
   9   3  -9 154.732 15.3120   3
   8  -3  -9 80.3643 10.4019   1
   8  -3  -9 80.2948 12.5772   3
   8   3  -9 77.1869 10.8858   3
   7  -3  -9 114.271 10.7753   1
  -7   3   9 129.697 12.1484   4
   7   3  -9 115.771 12.7767   3
   6  -3  -9 0.21965 3.66301   1
  -6   3   9 1.83143 3.95563   4
   6   3  -9 -0.6609 4.23968   3
   5  -3  -9 170.207 10.6942   1
  -5   3   9 173.011 11.3313   4
   5   3  -9 152.302 12.6251   3
   4  -3  -9 33.3889 7.29459   2
   4  -3  -9 30.8019 8.25215   3
   4  -3  -9 35.3471 6.08124   1
   4   3  -9 39.1136 8.25809   3
  -4   3   9 33.4245 6.08833   4
   3  -3  -9 25.0100 7.36422   3
   3  -3  -9 10.5132 5.25838   2
   3  -3  -9 15.4452 4.30440   1
   3   3  -9 7.15092 3.04635   4
  -3   3   9 9.99104 4.50970   4
   2  -3  -9 0.73887 3.74598   2
   2  -3  -9 0.66630 2.97262   1
   2  -3  -9 4.57578 5.11268   3
  -2   3   9 -0.1478 3.34817   4
  -2   3   9 2.83164 3.39140   1
   1  -3  -9 2.26833 4.07401   2
   1  -3  -9 0.92901 3.01464   1
   1  -3  -9 2.73724 4.79188   3
  -1   3   9 1.32085 3.35860   1
  -1   3   9 -2.2389 2.77898   4
   0  -3  -9 18.4354 3.87645   1
   0  -3  -9 17.3819 4.12697   1
   0  -3  -9 19.2173 5.93543   2
   0  -3  -9 19.5985 6.62240   3
   0   3  -9 19.2487 4.27883   2
   0   3   9 25.5975 4.85570   4
   0   3   9 13.9020 4.86375   1
  -1  -3  -9 149.021 11.7091   3
  -1  -3  -9 116.616 11.5886   2
  -1  -3  -9 141.778 7.93282   1
  -1  -3  -9 113.765 7.12961   1
   1   3   9 119.969 9.13355   1
  -1   3  -9 114.806 7.49094   2
   1   3   9 132.713 8.56442   4
  -2  -3  -9 344.358 11.3857   1
  -2  -3  -9 313.496 16.3969   2
  -2  -3  -9 326.289 15.7986   3
  -2  -3  -9 349.706 11.9190   1
   2   3   9 328.949 12.8679   4
  -2   3  -9 349.975 12.4900   2
   2   3   9 338.901 14.4723   1
  -3  -3  -9 8.52523 5.07858   3
  -3  -3  -9 7.14032 3.48340   1
  -3  -3  -9 4.58166 5.25485   2
  -3  -3  -9 7.02271 3.15580   1
   3   3   9 1.73504 3.89442   4
  -3   3  -9 3.56996 3.21823   2
  -3   3  -9 6.13157 2.02147   4
   3   3   9 6.73123 4.56845   1
  -4  -3  -9 13.5885 4.07374   1
  -4  -3  -9 6.22855 5.20401   2
  -4  -3  -9 8.52373 3.40592   1
  -4  -3  -9 8.04768 5.04581   3
  -4   3  -9 12.7937 2.88163   4
  -4   3  -9 16.2930 4.45246   2
   4   3   9 9.76142 4.61769   1
  -5  -3  -9 -2.1886 4.37625   2
  -5  -3  -9 -0.5470 3.17133   1
  -5  -3  -9 -0.4285 4.09477   3
  -5   3  -9 -3.4172 3.21652   2
   5   3   9 0.97971 3.67289   1
  -6  -3  -9 264.748 11.4847   1
  -6  -3  -9 293.971 18.0732   2
   6   3   9 272.825 14.9371   1
  -6   3  -9 272.757 13.4533   2
  -7  -3  -9 405.432 21.1602   2
  -7  -3  -9 423.820 14.7602   1
  -7   3  -9 367.656 16.6578   2
   7   3   9 392.107 18.2389   1
  -8  -3  -9 80.3860 8.10849   1
  -8  -3  -9 80.4079 12.2860   2
   8   3   9 60.6264 9.93587   1
  -8   3  -9 77.9652 9.98705   2
  -9  -3  -9 135.897 16.1296   2
  -9  -3  -9 158.395 10.2929   1
  -9   3  -9 171.629 13.4039   2
 -10  -3  -9 0.66537 3.96973   1
 -10  -3  -9 -0.3575 6.29605   2
 -10   3  -9 2.48405 5.62086   2
 -11  -3  -9 47.3799 7.13183   1
 -11  -3  -9 49.7476 11.9430   2
 -11   3  -9 54.7607 10.1698   2
  11  -4  -9 -5.8758 4.28084   1
  10  -4  -9 8.91746 5.42216   1
   9  -4  -9 70.3483 9.88224   1
   8  -4  -9 465.704 19.9105   1
  -8   4   9 486.692 23.0806   4
   7  -4  -9 -0.5275 3.88038   1
  -7   4   9 7.15932 5.12361   4
   6  -4  -9 180.562 12.0503   1
  -6   4   9 212.303 13.4803   4
   5  -4  -9 99.0278 9.91038   1
  -5   4   9 104.994 10.6172   4
   4  -4  -9 70.3575 9.90337   2
   4  -4  -9 83.1883 9.03993   1
  -4   4   9 80.9823 9.37471   4
   3  -4  -9 -3.3554 3.21933   1
   3  -4  -9 4.06312 4.81500   2
  -3   4   9 5.99205 4.45622   4
   2  -4  -9 135.009 13.0837   2
   2  -4  -9 134.240 9.42226   1
  -2   4   9 129.633 9.62081   4
   1  -4  -9 4.32441 5.71297   3
   1  -4  -9 2.19326 4.52163   2
   1  -4  -9 4.15863 3.62443   1
  -1   4   9 5.03080 4.17962   4
  -1   4   9 7.86365 4.27170   1
   0  -4  -9 39.5546 7.93981   3
   0  -4  -9 61.3622 9.18605   2
   0  -4  -9 72.5176 7.96860   1
   0   4   9 72.5681 8.04230   4
   0   4   9 68.8978 8.70328   1
  -1  -4  -9 -2.4567 3.04287   1
  -1  -4  -9 -5.5736 4.31081   3
  -1  -4  -9 1.76237 4.53717   2
   1   4   9 2.56816 3.95463   4
  -1   4  -9 -5.6236 1.82796   2
   1   4   9 3.33089 3.60262   1
  -2  -4  -9 116.099 11.8607   3
  -2  -4  -9 101.982 11.4896   2
  -2  -4  -9 100.207 8.94778   1
   2   4   9 102.223 9.31988   4
  -2   4  -9 93.7814 6.44058   2
   2   4   9 97.2250 10.1900   1
  -3  -4  -9 -1.0845 3.40029   1
  -3  -4  -9 7.55822 5.20364   3
  -3  -4  -9 0.35177 4.78429   2
   3   4   9 8.66722 4.45658   1
  -3   4  -9 5.33285 2.86780   2
   3   4   9 2.15000 3.65210   4
  -4  -4  -9 -0.7538 4.72746   2
  -4  -4  -9 5.21051 4.22094   1
  -4  -4  -9 3.83363 4.62732   3
   4   4   9 1.06178 4.39728   1
  -4   4  -9 0.37033 3.06029   2
  -4   4  -9 2.17048 2.10463   4
  -5  -4  -9 69.5895 7.88370   1
  -5  -4  -9 73.3607 8.91456   3
  -5  -4  -9 51.6032 9.11451   2
  -5   4  -9 76.5188 7.70622   2
   5   4   9 79.4581 10.1832   1
  -6  -4  -9 6.08760 4.41319   3
  -6  -4  -9 0.57575 5.27400   2
  -6  -4  -9 3.07769 4.22055   1
  -6   4  -9 2.38149 3.75516   2
   6   4   9 0.97220 4.64641   1
  -7  -4  -9 189.528 17.7483   2
  -7  -4  -9 187.446 11.6430   1
   7   4   9 219.050 14.8427   1
  -7   4  -9 220.542 12.3635   2
  -8  -4  -9 13.0585 5.36971   1
  -8  -4  -9 16.6541 7.45577   2
  -8   4  -9 15.5441 5.53407   2
   8   4   9 25.9515 7.64548   1
  -9  -4  -9 118.810 15.8505   2
  -9  -4  -9 105.796 10.8013   1
  -9   4  -9 111.793 12.1900   2
   9   4   9 123.789 14.2428   1
 -10  -4  -9 38.8470 7.35237   1
 -10  -4  -9 39.8348 10.3989   2
  10   4   9 42.6594 11.1961   1
 -10   4  -9 41.6153 8.47976   2
 -11  -4  -9 0.92393 7.40754   2
 -11  -4  -9 12.7657 6.49320   1
 -11   4  -9 12.7697 6.53084   2
  11  -5  -9 126.963 14.1156   1
  10  -5  -9 -3.6513 4.35074   1
   9  -5  -9 74.6489 11.5331   1
   8  -5  -9 355.831 18.4841   1
  -8   5   9 325.345 18.3971   4
   7  -5  -9 21.3673 6.42746   1
  -7   5   9 13.3671 5.92993   4
   6  -5  -9 63.4576 9.02212   1
  -6   5   9 57.5702 9.13563   4
   5  -5  -9 177.396 12.3386   1
  -5   5   9 159.794 13.8561   4
   4  -5  -9 11.5559 4.85379   1
   4  -5  -9 16.4164 6.52986   2
  -4   5   9 17.1304 5.77774   4
   3  -5  -9 471.393 21.2117   2
   3  -5  -9 477.045 18.1472   1
  -3   5   9 467.395 18.6113   4
   2  -5  -9 221.386 14.6225   2
   2  -5  -9 246.587 13.1800   1
  -2   5   9 221.822 13.3588   4
   1  -5  -9 108.557 12.0488   2
   1  -5  -9 105.658 9.93193   1
  -1   5   9 97.0141 10.4472   1
  -1   5   9 96.3094 10.0486   4
   0  -5  -9 39.7698 6.72301   1
   0  -5  -9 36.1741 7.89372   2
   0   5   9 36.0203 6.68794   4
   0   5   9 31.2266 6.75652   1
  -1  -5  -9 11.0175 6.39018   3
  -1  -5  -9 -4.6574 3.98381   2
  -1  -5  -9 2.98792 4.32755   1
   1   5   9 1.47231 4.24987   4
   1   5   9 -0.9205 3.65906   1
  -2  -5  -9 175.601 13.6448   2
  -2  -5  -9 172.957 13.0519   3
  -2  -5  -9 169.696 11.0815   1
  -2   5  -9 183.458 7.08494   2
   2   5   9 204.560 13.0302   1
   2   5   9 177.366 11.9853   4
  -3  -5  -9 89.2889 9.57533   1
  -3  -5  -9 91.5988 10.8702   3
  -3  -5  -9 79.3826 10.9890   2
   3   5   9 88.0560 9.70387   4
   3   5   9 68.2929 9.05737   1
  -3   5  -9 81.4435 5.40067   2
  -4  -5  -9 199.736 15.3595   2
  -4  -5  -9 208.113 12.5865   3
  -4  -5  -9 209.145 12.3321   1
   4   5   9 204.353 21.7153   4
  -4   5  -9 206.066 7.22285   4
   4   5   9 212.845 13.7729   1
  -4   5  -9 186.208 8.30051   2
  -5  -5  -9 61.9958 10.5762   2
  -5  -5  -9 63.1337 8.24991   1
  -5  -5  -9 80.7156 9.23969   3
  -5   5  -9 72.6900 6.99036   2
  -5   5  -9 76.0968 5.82411   4
   5   5   9 59.2307 9.33499   1
  -6  -5  -9 315.424 14.2929   3
  -6  -5  -9 356.779 16.0842   1
  -6  -5  -9 354.986 20.5597   2
   6   5   9 329.895 17.9906   1
  -6   5  -9 369.853 14.8626   2
  -7  -5  -9 26.8680 8.35944   2
  -7  -5  -9 19.2214 6.28093   1
   7   5   9 28.5999 8.11018   1
  -8  -5  -9 27.9729 6.93947   1
  -8  -5  -9 20.6358 8.03180   2
   8   5   9 27.2875 7.81463   1
  -9  -5  -9 10.5618 5.60186   1
  -9  -5  -9 15.8099 7.66972   2
   9   5   9 8.91320 7.09985   1
 -10  -5  -9 386.641 18.9210   1
 -10  -5  -9 406.747 25.2924   2
  10   5   9 387.138 22.1517   1
  10  -6  -9 17.7373 7.71399   1
   9  -6  -9 0.04523 4.92208   1
  -9   6   9 7.53284 7.97755   4
   8  -6  -9 -0.0870 4.73828   1
  -8   6   9 14.8026 6.97048   4
   7  -6  -9 27.6231 6.96891   1
  -7   6   9 16.0690 6.85492   4
   6  -6  -9 35.9370 7.92107   1
  -6   6   9 39.9730 8.54394   4
   5  -6  -9 28.3873 7.27789   1
  -5   6   9 41.6370 8.33800   4
   4  -6  -9 -6.0892 4.20300   2
   4  -6  -9 4.31623 4.64730   1
  -4   6   9 3.03136 5.33473   4
   3  -6  -9 8.34554 5.80699   2
   3  -6  -9 14.3083 5.63485   1
  -3   6   9 8.50694 5.24898   4
   2  -6  -9 3.85892 5.12137   2
   2  -6  -9 7.45440 4.88019   1
  -2   6   9 4.66680 4.71608   4
   1  -6  -9 908.279 26.5707   1
   1  -6  -9 874.127 29.6025   2
  -1   6   9 866.476 26.6219   4
  -1   6   9 928.443 28.3685   1
   0  -6  -9 22.6562 5.93259   1
   0  -6  -9 15.4797 6.29547   2
   0   6   9 11.0597 5.50097   4
   0   6   9 35.6974 7.86386   1
  -1  -6  -9 29.3397 8.05757   2
  -1  -6  -9 32.3908 6.71400   1
   1   6   9 35.3954 7.63061   1
   1   6   9 26.3013 6.83144   4
  -2  -6  -9 14.2553 6.49763   3
  -2  -6  -9 7.37798 5.02764   1
  -2  -6  -9 19.6798 7.03788   2
   2   6   9 12.2414 5.73776   1
   2   6   9 10.7375 5.20783   4
  -3  -6  -9 793.223 29.0416   2
  -3  -6  -9 713.709 24.3344   3
  -3  -6  -9 775.894 24.2821   1
   3   6   9 728.532 24.5496   4
   3   6   9 707.486 25.2674   1
  -4  -6  -9 7.39463 5.09130   1
  -4  -6  -9 10.9296 5.77373   3
  -4  -6  -9 5.29322 5.72130   2
   4   6   9 8.80524 6.38125   4
   4   6   9 17.4242 6.74777   1
  -4   6  -9 10.5316 2.78048   4
  -5  -6  -9 14.8450 7.38787   2
  -5  -6  -9 29.0531 6.53888   3
  -5  -6  -9 24.1958 6.98250   1
   5   6   9 34.1644 8.55825   1
  -5   6  -9 39.6732 4.89957   4
  -6  -6  -9 14.1660 6.09630   1
  -6  -6  -9 20.5693 8.16784   2
   6   6   9 10.0883 6.16255   1
  -6   6  -9 14.8779 3.92220   4
  -7  -6  -9 32.1963 8.70636   2
  -7  -6  -9 40.6779 8.51002   1
   7   6   9 44.3133 9.04683   1
  -7   6  -9 21.6268 5.23142   4
  -8  -6  -9 2.23224 4.74847   1
  -8  -6  -9 7.89560 7.24682   2
   8   6   9 5.61589 6.58998   1
  -9  -6  -9 24.2221 7.15274   1
  -9  -6  -9 23.2530 9.34788   2
   9   6   9 20.4894 8.35754   1
 -10  -6  -9 128.723 17.9699   2
 -10  -6  -9 139.085 14.0650   1
  10   6   9 149.980 17.3701   1
   9  -7  -9 28.0931 7.87644   1
   9   7  -9 32.7642 8.09969   4
  -9   7   9 26.7887 9.34151   4
   8  -7  -9 2.97250 5.27305   1
  -8   7   9 7.51365 7.02109   4
   7  -7  -9 504.688 22.8552   1
  -7   7   9 505.397 23.9495   4
   6  -7  -9 5.55769 5.16223   1
  -6   7   9 10.7466 6.68171   4
   5  -7  -9 48.9612 8.57146   1
  -5   7   9 33.4806 8.36522   4
   4  -7  -9 158.595 15.6389   2
   4  -7  -9 129.685 12.8667   1
  -4   7   9 134.823 13.8336   4
   3  -7  -9 37.0752 8.64277   2
   3  -7  -9 37.7292 7.38416   1
  -3   7   9 32.0409 7.86539   4
   2  -7  -9 31.2954 7.89089   2
   2  -7  -9 26.1205 6.74362   1
  -2   7   9 26.2542 7.33639   4
   1  -7  -9 512.365 23.0402   2
   1  -7  -9 465.468 19.9726   1
  -1   7   9 484.653 20.7859   4
   1   7  -9 474.957 12.5372   4
   0  -7  -9 0.42752 4.51617   1
   0  -7  -9 0.95303 5.42779   2
   0   7   9 8.78856 5.48130   1
   0   7  -9 9.98650 2.52188   4
   0   7   9 10.5688 5.74226   4
  -1  -7  -9 -1.4854 4.40557   2
  -1  -7  -9 -1.4227 4.27675   1
   1   7   9 5.68689 4.66033   1
   1   7   9 2.98756 4.72440   4
  -2  -7  -9 48.3601 10.0174   2
  -2  -7  -9 44.5837 8.16345   1
   2   7   9 55.2105 9.53356   1
   2   7   9 58.6422 9.40685   4
  -3  -7  -9 156.847 14.6668   3
  -3  -7  -9 168.798 12.9112   1
  -3  -7  -9 154.310 16.0417   2
  -3   7  -9 163.155 6.69612   4
   3   7   9 142.925 14.3564   1
   3   7   9 141.686 13.6923   4
  -4  -7  -9 233.915 15.0760   1
  -4  -7  -9 233.587 14.2596   3
  -4  -7  -9 260.768 18.1785   2
   4   7   9 251.570 18.5763   4
  -4   7  -9 232.024 8.91950   4
   4   7   9 226.261 15.6676   1
  -5  -7  -9 49.0457 8.46930   1
  -5  -7  -9 85.5653 10.1748   3
  -5  -7  -9 79.0556 12.7320   2
  -5   7  -9 67.6844 6.44926   4
   5   7   9 48.9817 9.16860   1
  -6  -7  -9 2.00581 5.14071   1
  -6  -7  -9 -3.3834 5.06857   2
  -6   7  -9 -1.2548 3.04752   4
   6   7   9 -2.8999 4.97683   1
  -7  -7  -9 90.6316 13.6900   2
  -7  -7  -9 102.264 12.5453   1
   7   7   9 113.775 13.5334   1
  -7   7  -9 118.791 8.96077   4
  -8  -7  -9 12.0961 6.59903   1
  -8  -7  -9 15.1870 8.14086   2
  -8   7  -9 15.9571 5.10969   4
   8   7   9 7.37102 6.32544   1
  -9  -7  -9 118.353 16.6762   2
  -9  -7  -9 146.481 15.0466   1
   9   7   9 141.808 17.0410   1
   8  -8  -9 -4.8051 4.68127   1
   8   8  -9 0.32980 4.65072   4
  -8   8   9 -6.5682 5.68183   4
   7  -8  -9 4.45774 5.79347   1
   7   8  -9 2.14926 4.63737   4
  -7   8   9 3.89998 6.61125   4
   6  -8  -9 214.559 16.2699   1
  -6   8   9 238.795 17.5475   4
   6   8  -9 223.458 13.8915   4
   5  -8  -9 12.4942 6.50441   1
   5   8  -9 24.1216 5.86679   4
  -5   8   9 32.7070 8.95143   4
   4  -8  -9 54.9907 10.3775   2
   4  -8  -9 53.1444 9.32021   1
   4   8  -9 56.9977 7.53196   4
  -4   8   9 52.6191 10.0531   4
   3  -8  -9 -0.5624 4.80010   1
   3  -8  -9 2.01077 5.19303   2
   3   8  -9 2.12236 3.49272   4
  -3   8   9 1.92694 5.10438   4
   2  -8  -9 100.090 12.9286   2
   2  -8  -9 109.929 13.6912   1
  -2   8   9 89.1840 12.4173   4
   2   8  -9 103.855 8.34721   4
   1  -8  -9 71.5433 11.8796   2
   1  -8  -9 61.5762 9.58659   1
   1   8  -9 77.3085 6.73221   4
  -1   8   9 88.3444 11.9926   4
   0  -8  -9 16.8947 6.89081   2
   0  -8  -9 20.1415 6.89389   1
   0   8   9 9.30764 6.43126   4
   0   8  -9 23.3724 4.06726   4
   0   8   9 17.7007 6.60723   1
  -1  -8  -9 45.7417 9.83179   2
  -1  -8  -9 53.7831 9.64751   1
   1   8   9 43.1515 8.69618   1
  -1   8  -9 56.9107 5.14464   4
   1   8   9 32.5070 8.25405   4
  -2  -8  -9 41.6391 9.47520   2
  -2  -8  -9 23.9752 7.20519   1
   2   8   9 32.9619 8.23239   4
  -2   8  -9 31.6526 4.28925   4
   2   8   9 29.9780 8.08732   1
  -3  -8  -9 -2.4201 4.33353   1
  -3  -8  -9 2.71449 6.13272   2
  -3   8  -9 5.18639 2.88590   4
   3   8   9 6.24293 6.00915   4
   3   8   9 4.21273 6.06577   1
  -4  -8  -9 46.8106 9.40582   1
  -4  -8  -9 70.6951 10.3898   3
  -4  -8  -9 67.2197 11.5455   2
   4   8   9 62.4302 14.2797   4
   4   8   9 70.2797 11.8535   1
  -4   8  -9 56.8389 6.07307   4
  -5  -8  -9 10.4015 7.10692   2
  -5  -8  -9 15.3032 6.51143   1
   5   8   9 13.7167 6.43519   1
  -5   8  -9 16.6850 4.24518   4
  -6  -8  -9 11.2279 7.76677   2
  -6  -8  -9 2.44711 5.66630   1
   6   8   9 -0.2234 4.94108   1
  -6   8  -9 5.69470 3.80525   4
  -7  -8  -9 121.764 14.7257   1
  -7  -8  -9 135.124 17.2530   2
  -7   8  -9 135.375 10.1988   4
   7   8   9 120.227 15.1476   1
  -8  -8  -9 68.3618 11.4896   1
  -8  -8  -9 64.1648 13.0615   2
   8   8   9 68.2671 12.4236   1
  -8   8  -9 81.1462 9.41774   4
   7  -9  -9 13.0624 7.04228   1
  -7   9   9 10.0135 7.87687   4
   7   9  -9 14.0278 6.08483   4
   6  -9  -9 161.829 16.0548   1
   6   9  -9 161.804 14.1421   4
  -6   9   9 175.905 18.2418   4
   5  -9  -9 26.6445 8.58206   1
   5   9  -9 32.4653 6.87744   4
  -5   9   9 17.4765 7.39830   4
   4  -9  -9 28.9951 8.11487   1
   4  -9  -9 6.00613 6.13093   2
  -4   9   9 15.5413 7.37496   4
   4   9  -9 23.1506 6.11304   4
   3  -9  -9 157.278 15.3168   1
   3  -9  -9 158.762 16.7313   2
   3   9  -9 142.782 10.2785   4
  -3   9   9 142.282 15.4897   4
   2  -9  -9 55.4514 10.1950   1
   2  -9  -9 79.7471 12.1967   2
   2   9  -9 75.5140 7.79377   4
  -2   9   9 119.729 14.5845   4
   1  -9  -9 23.2173 8.14840   2
   1  -9  -9 33.8859 8.98787   1
  -1   9   9 33.7363 8.65163   4
   1   9  -9 25.8097 5.12191   4
   0  -9  -9 8.59061 6.28642   1
   0  -9  -9 30.0385 8.57963   2
   0   9  -9 17.4519 4.57761   4
   0   9   9 28.4570 8.25581   4
  -1  -9  -9 2.05765 5.70054   2
  -1  -9  -9 -0.8172 5.09467   1
   1   9   9 -0.6786 4.50215   1
  -1   9  -9 0.01225 2.89590   4
   1   9   9 -4.5782 5.07347   4
  -2  -9  -9 286.135 19.1486   2
  -2  -9  -9 300.737 18.3132   1
   2   9   9 271.717 18.4910   4
  -2   9  -9 299.619 11.3200   4
   2   9   9 295.219 18.7494   1
  -3  -9  -9 9.03306 6.98702   2
  -3  -9  -9 -1.9971 5.08445   1
   3   9   9 6.88867 6.44275   1
  -3   9  -9 7.45805 3.38631   4
[truncated: 80,860 more chars]
